# Supplementary material for: Comparative gene expression responses to Babesia infection and oil contamination in a seabird
Source: Frontiers journal article supplement (doi:10.3389/fcosc.2024.1425484), 2024-08-22
Supplement: Table_1.XLSX [file Table_1.XLSX]

## Sheet: control vs oil
GeneID	gene	log_fold_change	ave_expression	t	p_val	adj_p_val	B
URIAAL_R04409	Il17re_0	4.65484	-3.22109	7.51453	0.000203159	0.521736	-3.22054
NA	NA	5.11533	-3.52406	6.77734	0.000422549	0.521736	-3.31653
URIAAL_R00122	Hmcn2_0	3.97127	-4.08424	6.5714	0.000429233	0.521736	-3.42207
URIAAL_R08572	Plekhm3	3.49054	4.08405	6.63821	0.000474417	0.521736	-0.917318
URIAAL_R14934	Muc3b	4.14004	-3.99975	6.37452	0.000514487	0.521736	-3.41973
URIAAL_R06524	Greb1	3.87224	-4.13694	6.18723	0.000605165	0.521736	-3.45827
URIAAL_R06020	Irf2bpl	2.24369	2.13901	6.18928	0.00069855	0.521736	-1.65849
URIAAL_R01353	Chn1	-3.59846	-1.9222	-5.94937	0.000820018	0.521736	-3.18413
URIAAL_R08101	Pask_0	-1.43449	5.03658	-5.98518	0.000838839	0.521736	-0.794577
URIAAL_R05708	Ddc	3.69248	-4.22346	5.71063	0.000948086	0.521736	-3.50891
NA	NA	3.74947	-4.19337	5.68336	0.000976809	0.521736	-3.50906
URIAAL_R07678	Abca5_1	1.82015	1.75552	5.70405	0.000979537	0.521736	-1.86502
URIAAL_R11531	Amz1	3.32597	-4.4108	5.66577	0.000990369	0.521736	-3.52757
URIAAL_R01546	Prtg	3.93322	-4.10064	5.64845	0.00106436	0.521736	-3.51243
URIAAL_R08102	Pask_1	-1.28889	5.36499	-5.66326	0.00113034	0.521736	-0.908481
URIAAL_R15549	Myo9a_2	-4.3981	-2.96216	-5.56998	0.0012352	0.521736	-3.38169
URIAAL_R10656	Il18r1	-4.43818	-3.1143	-5.55472	0.00125338	0.521736	-3.40353
URIAAL_R08674	Slc8b1	1.75598	2.42153	5.52085	0.00127534	0.521736	-1.71917
URIAAL_R11315	Glp2r	3.72081	-4.20706	5.43628	0.00128587	0.521736	-3.54212
URIAAL_R13877	Trdmt1	-1.26457	6.33819	-5.5143	0.00130302	0.521736	-0.908487
URIAAL_R06677	Actr6	-1.09275	5.28106	-5.26311	0.00158889	0.521736	-1.11256
NA	NA	3.2321	-0.629713	5.30133	0.00160431	0.521736	-3.06336
NA	NA	3.02773	-4.55964	5.18327	0.00160885	0.521736	-3.58593
URIAAL_R00146	Gsn	1.39038	5.20089	5.25838	0.00167421	0.521736	-1.1683
URIAAL_R12487	Cidea	1.64417	1.95899	5.18678	0.00167955	0.521736	-1.97158
URIAAL_R01654	Polg	1.27008	4.46957	5.20628	0.00176367	0.521736	-1.30685
URIAAL_R04729	Baalc	-4.51093	-3.86122	-5.19134	0.00179031	0.521736	-3.53014
URIAAL_R09835	Tpm2	2.04331	5.58468	5.13129	0.00190205	0.521736	-1.2263
URIAAL_R11889	Hectd4	1.52249	3.65109	5.10152	0.00196037	0.521736	-1.5444
URIAAL_R11076	Dkk1	3.34529	-3.87278	4.98609	0.00201831	0.521736	-3.57623
URIAAL_R14413	Aph1a	1.59656	3.83255	5.05632	0.00205278	0.521736	-1.52992
URIAAL_R12573	Ntn4_1	2.90659	-4.62007	4.948	0.00206088	0.521736	-3.61669
URIAAL_R07895	Hpse	1.53713	4.10507	5.03906	0.00208936	0.521736	-1.48014
URIAAL_R01756	Wdfy4_0	-1.96427	0.80687	-4.96085	0.00214127	0.521736	-2.51067
URIAAL_R14199	Lhcgr	-3.09067	-4.55213	-4.89463	0.00218223	0.521736	-3.61858
URIAAL_R03807	Ric8a	1.25374	2.83278	4.84323	0.00231758	0.521736	-1.81286
URIAAL_R12426	Eda	3.35479	-4.39921	4.85946	0.00233175	0.521736	-3.62038
URIAAL_R12612	Cdcp1	-3.57764	-4.30796	-4.83444	0.00250953	0.521736	-3.62964
URIAAL_R05965	Pgf	-3.75933	-4.22346	-4.84085	0.00256661	0.521736	-3.62893
URIAAL_R01858	Klhdc8a	3.23642	-0.931541	4.83316	0.00258745	0.521736	-3.20469
URIAAL_R12013	Mdm1	1.36391	3.71758	4.79497	0.00269386	0.521736	-1.69565
URIAAL_R10647	Crlf2	-2.7898	-4.70098	-4.67732	0.00276611	0.521736	-3.65569
URIAAL_R05203	Itgb3	2.26583	5.10733	4.76642	0.00277662	0.521736	-1.52627
URIAAL_R06258	Socs3	1.56899	2.45988	4.76504	0.00278068	0.521736	-2.03124
URIAAL_R11046	Arhgap15_0	-1.47637	3.34486	-4.74682	0.00283508	0.521736	-1.80717
URIAAL_R12761	Slc35f1	3.42337	-4.36669	4.70325	0.00285695	0.521736	-3.64723
NA	NA	3.84125	-3.3768	4.73508	0.00287077	0.521736	-3.55944
URIAAL_R03374	Slc9a9	-2.04483	0.302712	-4.66748	0.00294123	0.521736	-2.79929
URIAAL_R09673	Fsd1	3.01767	-2.20632	4.67519	0.00299106	0.521736	-3.42835
URIAAL_R09292	Dock2_2	-0.96879	4.34903	-4.60643	0.00301093	0.521736	-1.63035
URIAAL_R13487	Casc4	-1.92334	7.71301	-4.67764	0.00305279	0.521736	-1.44349
URIAAL_R00426	Slc13a5	4.05747	-3.25132	4.66503	0.00309444	0.521736	-3.54505
URIAAL_R07666	Syngr2	2.09101	1.39123	4.65734	0.00312018	0.521736	-2.44385
URIAAL_R03644	Chrm4	3.21639	-4.46371	4.58743	0.00315623	0.521736	-3.66143
URIAAL_R14097	Soga1	2.22573	0.026986	4.60946	0.00320027	0.521736	-2.93644
URIAAL_R00559	Rsad1	1.89799	1.01259	4.60682	0.00328865	0.521736	-2.57793
URIAAL_R01206	Myocd	3.95729	-2.3714	4.59676	0.00333144	0.521736	-3.44648
URIAAL_R04139	Alpk1	1.82359	-0.282341	4.50829	0.0033418	0.521736	-3.01213
URIAAL_R10604	Tnik_2	2.07103	3.43769	4.57949	0.0033946	0.521736	-1.90713
URIAAL_R06720	Rsph4a	3.49051	-3.55847	4.57582	0.00340818	0.521736	-3.61683
URIAAL_R07237	Iqck	-2.41597	-1.7368	-4.48994	0.00341196	0.521736	-3.3812
URIAAL_R04552	Tcte3	2.86322	-4.64055	4.48947	0.00341377	0.521736	-3.67776
URIAAL_R10674	Zyx	1.43682	2.90358	4.56549	0.00344676	0.521736	-2.01238
URIAAL_R15376	Npc1l1_0	2.74443	-4.70098	4.44637	0.00358519	0.521736	-3.68763
URIAAL_R10993	Slc25a1	1.43901	3.30425	4.50378	0.00368766	0.521736	-1.95891
URIAAL_R07677	Abca5_0	1.34817	1.76488	4.40379	0.00377074	0.521736	-2.3412
URIAAL_R12461	Ldlrad4	1.73036	1.51317	4.47626	0.00380113	0.521736	-2.4532
URIAAL_R06427	Fhod1	1.33646	3.16809	4.4655	0.00384654	0.521736	-2.00677
URIAAL_R07538	Etv4	-2.97679	-0.66592	-4.46445	0.00385101	0.521736	-3.23295
URIAAL_R14750	Rhebl1	3.67776	-4.23308	4.46364	0.00385448	0.521736	-3.68089
URIAAL_R03998	Ahsa2	1.26056	3.74867	4.4491	0.00391694	0.521736	-1.90158
URIAAL_R07776	Slc9a3r1	1.71832	3.89118	4.44784	0.00392244	0.521736	-1.8901
NA	NA	4.51844	-3.78384	4.44714	0.00392546	0.521736	-3.61483
URIAAL_R05771	Kcna4	3.03679	-4.55213	4.38312	0.00393895	0.521736	-3.69378
URIAAL_R09013	Fhl3	1.76068	2.36865	4.43138	0.00399466	0.521736	-2.2305
URIAAL_R11809	Afap1l2_0	3.27962	-4.4293	4.4045	0.00401453	0.521736	-3.69488
URIAAL_R07436	Arhgap5	-1.42373	5.73666	-4.42574	0.00401974	0.521736	-1.69549
URIAAL_R12503	Arhgef17	3.8466	-3.36703	4.42506	0.0040228	0.521736	-3.60412
URIAAL_R13809	Spata17	3.76715	-4.18934	4.4222	0.00403559	0.521736	-3.68306
URIAAL_R07457	Slirp	-0.739283	6.06558	-4.33738	0.00406299	0.521736	-1.68276
URIAAL_R09191	Phgdh	4.03729	-3.26982	4.41293	0.0040774	0.521736	-3.58803
URIAAL_R00507	Evpl	-1.38624	2.0717	-4.37445	0.0041049	0.521736	-2.29996
URIAAL_R11438	Tmem39a	1.31001	3.41998	4.39815	0.00414504	0.521736	-1.99621
URIAAL_R00469	Chrm2	3.10576	-4.51772	4.35021	0.00416245	0.521736	-3.70136
URIAAL_R04959	Scnn1a_0	-1.60126	3.35235	-4.39127	0.00417701	0.521736	-2.02125
URIAAL_R13793	Tmem17_0	3.27082	-1.21676	4.39078	0.00417929	0.521736	-3.33737
URIAAL_R08974	Ltc4s_1	-2.70661	-2.92548	-4.31801	0.00419659	0.521736	-3.58571
URIAAL_R06919	Tbxa2r	2.08722	1.78505	4.37514	0.00425292	0.521736	-2.43747
URIAAL_R10668	Lpcat3	0.975448	5.13575	4.37034	0.00426402	0.521736	-1.77116
URIAAL_R08418	Tnfaip8	-1.44567	1.09586	-4.29211	0.0042819	0.521736	-2.60141
URIAAL_R01248	Dot1l	0.766906	6.57372	4.28201	0.0043548	0.521736	-1.71887
URIAAL_R15092	Apbb1	1.33261	3.78439	4.34961	0.00437625	0.521736	-1.96303
URIAAL_R04118	Emb	-2.37118	-0.872066	-4.30877	0.00442428	0.521736	-3.28647
URIAAL_R06169	Srgn	-1.19665	5.77457	-4.33877	0.00442987	0.521736	-1.75865
URIAAL_R06374	Hopx	-1.66227	0.596459	-4.2747	0.00443487	0.521736	-2.7891
URIAAL_R13612	Asb14	-3.24717	-4.46371	-4.30819	0.00449948	0.521736	-3.71256
URIAAL_R11201	Frmd3	-3.07907	-4.03132	-4.27386	0.00460304	0.521736	-3.69988
URIAAL_R03532	Spo11	2.73859	-4.70098	4.21793	0.00466955	0.521736	-3.72231
URIAAL_R15072	Ddb_3	2.73859	-4.70098	4.21793	0.00466955	0.521736	-3.72231
NA	NA	-3.73689	-3.16123	-4.28651	0.00469865	0.521736	-3.60861
URIAAL_R13381	Unc13c	2.5853	-4.78188	4.20944	0.00471633	0.521736	-3.72825
URIAAL_R00419	Lhx1	3.16364	-4.48762	4.24785	0.00478848	0.521736	-3.72137
URIAAL_R02828	Onecut2_0	3.16364	-4.48762	4.24785	0.00478848	0.521736	-3.72137
URIAAL_R07612	Tmem263_0	1.84364	1.18082	4.22957	0.00501246	0.521736	-2.6704
URIAAL_R09295	Npm1	-1.01484	5.9226	-4.22903	0.00501556	0.521736	-1.8392
URIAAL_R12334	Efhc2	3.70619	-4.21121	4.21481	0.00509757	0.521736	-3.71637
URIAAL_R09142	Tmem117	2.76481	-4.69346	4.14217	0.00510603	0.521736	-3.73414
URIAAL_R05937	Egln3	2.76481	-4.69346	4.14217	0.00510603	0.521736	-3.73414
URIAAL_R13235	Alcam	-3.42696	-4.37246	-4.18953	0.00524714	0.521736	-3.73051
URIAAL_R04052	Reep5	1.43607	5.08486	4.17889	0.00531151	0.521736	-1.93448
URIAAL_R01906	Irf6	-4.11665	-2.7356	-4.17009	0.00536548	0.521736	-3.56861
URIAAL_R02588	Kcnrg	1.94452	1.3376	4.1634	0.00540683	0.521736	-2.65872
URIAAL_R04268	Znf281	1.35166	2.11794	4.14546	0.00542353	0.521736	-2.42152
URIAAL_R01313	Tmem109	3.79272	-2.19653	4.16022	0.00542667	0.521736	-3.51214
URIAAL_R13385	Bnc1	3.64695	-4.24197	4.15881	0.0054355	0.521736	-3.72782
URIAAL_R08990	Fnip1	-1.11915	7.82424	-4.1524	0.00547573	0.521736	-1.86794
URIAAL_R05682	Ly86	-1.55523	6.12716	-4.14971	0.00549269	0.521736	-1.90244
URIAAL_R01752	Msmb_0	-2.16548	0.204197	-4.14544	0.00551977	0.521736	-3.02654
URIAAL_R03041	B4galnt3	2.58182	-4.78188	4.07523	0.0055295	0.521736	-3.75016
URIAAL_R01167	Crem	-1.05961	8.22693	-4.14253	0.00553834	0.521736	-1.87373
URIAAL_R03342	Slc25a36	-1.65252	8.50249	-4.14137	0.00554576	0.521736	-1.87441
NA	NA	-4.16421	-2.96793	-4.12895	0.00562578	0.521736	-3.60276
URIAAL_R13981	Pxylp1	-1.07506	3.7088	-4.1151	0.00568411	0.521736	-2.12858
URIAAL_R02419	Ndnf_1	3.51225	-3.54001	4.11404	0.00572358	0.521736	-3.68703
URIAAL_R12432	Rslbl	-2.83203	-4.14664	-4.06581	0.00573515	0.521736	-3.73475
URIAAL_R03953	Myl9	1.97366	2.38234	4.10876	0.00575868	0.521736	-2.41417
URIAAL_R04161	Phf24	3.02241	-3.78247	4.08153	0.00584947	0.521736	-3.72278
URIAAL_R07056	Cln5	1.50171	3.66445	4.09019	0.00588395	0.521736	-2.16556
URIAAL_R06864	Casp1	2.04947	3.29049	4.08982	0.0058865	0.521736	-2.2446
URIAAL_R03023	Ndufa7	-0.685254	6.20823	-4.01899	0.00591542	0.521736	-1.95437
URIAAL_R02942	Fcgbp_0	3.62407	-4.25356	4.08538	0.00591691	0.521736	-3.7407
URIAAL_R11968	Slc2a5_1	-3.34886	-3.13811	-4.0762	0.00598037	0.521736	-3.65809
URIAAL_R00904	Ssr2	1.03504	5.74533	4.07218	0.00600843	0.521736	-1.97796
URIAAL_R06848	Ceacam6	2.93055	2.28208	4.07042	0.00602075	0.521736	-2.51305
NA	NA	-1.18599	1.62791	-4.00246	0.00603443	0.521736	-2.58068
URIAAL_R03686	Aimp1	-0.829506	5.95118	-4.05108	0.00603774	0.521736	-1.97342
URIAAL_R05247	Calhm5	2.89581	-4.62896	4.02653	0.00607416	0.521736	-3.7597
URIAAL_R06826	Idua	1.84999	1.13737	4.05771	0.00611049	0.521736	-2.76081
URIAAL_R00967	Rcl1	1.26857	2.90388	4.05753	0.00611177	0.521736	-2.31362
URIAAL_R03639	Tnr	3.38864	-3.83422	4.05675	0.00611732	0.521736	-3.72729
URIAAL_R05664	Ankrd33b	2.67251	-4.20706	3.99315	0.00612464	0.521736	-3.74487
URIAAL_R13969	Gpr55	-2.61934	-4.78188	-3.98629	0.00615343	0.521736	-3.7653
URIAAL_R03356	Opa1	-1.48388	9.0087	-4.04935	0.00617039	0.521736	-1.95384
URIAAL_R01178	Ttll1	-1.59526	4.35942	-4.04473	0.00620375	0.521736	-2.11082
URIAAL_R00185	Sardh	3.96425	-3.30077	4.0327	0.00629159	0.521736	-3.66107
URIAAL_R00589	Chst10	2.45366	1.06633	4.03255	0.00629264	0.521736	-2.82908
URIAAL_R12702	Shf	2.09277	4.66132	4.03001	0.00631142	0.521736	-2.10404
URIAAL_R00005	Znf398	3.10393	0.380265	4.01439	0.00642789	0.521736	-3.09325
URIAAL_R08193	Slc2a3	1.20077	4.60104	4.0037	0.00650897	0.521736	-2.11117
URIAAL_R10311	Upp1	-2.36533	0.0667885	-4.00334	0.0065117	0.521736	-3.12897
URIAAL_R03310	Tfrc	1.97004	11.2411	3.99229	0.0065968	0.521736	-2.0132
NA	NA	1.75799	4.12064	3.99035	0.00661183	0.521736	-2.18381
URIAAL_R02124	Pdcd4_3	1.20769	1.96406	3.93838	0.00666274	0.521736	-2.54996
URIAAL_R02768	Fbln7_1	-2.34043	-4.92321	-3.91572	0.00670391	0.521736	-3.78499
URIAAL_R00715	Znf217	-0.828031	7.26223	-3.96258	0.00683174	0.521736	-2.04036
URIAAL_R10481	Rtcb	1.0285	5.2939	3.96197	0.00683668	0.521736	-2.09319
URIAAL_R10229	Icos	-2.3628	-0.593916	-3.96038	0.00684945	0.521736	-3.32199
URIAAL_R06230	Aatk	3.6653	-1.06724	3.95721	0.00687515	0.521736	-3.41954
URIAAL_R03795	Plcb2	1.89472	3.78199	3.95287	0.00691048	0.521736	-2.25882
URIAAL_R13072	Sorbs3	3.34595	-4.39489	3.94968	0.00693658	0.521736	-3.7716
URIAAL_R08343	Aaed1	1.77648	2.96639	3.94692	0.0069593	0.521736	-2.38822
URIAAL_R12425	Lrrc32	1.50733	2.94763	3.94198	0.00700002	0.521736	-2.38687
URIAAL_R05288	Apba1_0	2.34955	-0.973517	3.92768	0.00711964	0.521736	-3.41846
URIAAL_R03458	Trim37_1	0.869033	3.46567	3.86531	0.00713034	0.521736	-2.30106
URIAAL_R10404	A33_0	1.58076	6.54101	3.92073	0.00717854	0.521736	-2.09069
URIAAL_R08209	Tmem115	0.817048	5.82282	3.90804	0.00720254	0.521736	-2.108
URIAAL_R08515	Ccdc93	1.32846	3.43616	3.91749	0.00720616	0.521736	-2.32006
URIAAL_R03757		-1.01444	3.47852	-3.89552	0.00723898	0.521736	-2.3106
URIAAL_R06240	Gpr142	2.29868	-4.92321	3.84991	0.00726653	0.521736	-3.7969
URIAAL_R07120	Zbtb12	-3.45606	-1.46287	-3.90934	0.00727624	0.521736	-3.48348
URIAAL_R00272	Ehmt1	1.8298	0.622023	3.90764	0.00729101	0.521736	-2.97661
URIAAL_R11678	Clec19a	1.91481	1.4779	3.90735	0.0072935	0.521736	-2.74211
URIAAL_R05855	Sar1b	-1.80812	6.9481	-3.90018	0.00735594	0.521736	-2.10308
URIAAL_R01731	Loxl4	3.81904	-4.1477	3.89862	0.00736964	0.521736	-3.76412
URIAAL_R03498	Sp6	3.81904	-4.1477	3.89862	0.00736964	0.521736	-3.76412
URIAAL_R08270	Cd180	3.81904	-4.1477	3.89862	0.00736964	0.521736	-3.76412
URIAAL_R14877	Tigd5	1.91517	2.01856	3.89634	0.00738966	0.521736	-2.62016
URIAAL_R13547	Prickle2	1.83448	-0.326311	3.85394	0.00740706	0.521736	-3.24107
NA	NA	3.83942	-3.10686	3.89104	0.00743643	0.521736	-3.67438
NA	NA	1.3003	1.46016	3.84531	0.00748532	0.521736	-2.72793
URIAAL_R08539	Slc15a2	3.31674	-3.62298	3.88383	0.00750053	0.521736	-3.74221
URIAAL_R08142	Pak6	2.90244	-4.6267	3.86491	0.00751894	0.521736	-3.79326
URIAAL_R14533	Hsf1	-1.56377	4.92636	-3.8721	0.00760628	0.521736	-2.19963
URIAAL_R08716	Cryba4	2.67142	-4.73363	3.8252	0.00762186	0.521736	-3.79662
URIAAL_R05744	Serpinb6_1	-1.98829	-1.32345	-3.80963	0.00763643	0.521736	-3.48824
URIAAL_R05164	Adcy6_0	2.94204	-1.36777	3.8684	0.00763998	0.521736	-3.48802
URIAAL_R11473	Samsn1	-1.02662	3.62609	-3.86125	0.00769381	0.521736	-2.32899
URIAAL_R12132	Mrc1_2	-1.80139	1.76509	-3.84491	0.00785766	0.521736	-2.70097
NA	NA	-3.21921	-1.69035	-3.83941	0.00790961	0.521736	-3.53401
URIAAL_R07133	She	2.215	1.08264	3.83267	0.00797386	0.521736	-2.90234
URIAAL_R12235	Slc7a1	2.96277	-0.304438	3.83244	0.00797605	0.521736	-3.31774
URIAAL_R04768	Gch1	1.36664	1.30592	3.80359	0.00801351	0.521736	-2.80043
URIAAL_R15257	Rnf31	1.41922	4.78259	3.82216	0.00807513	0.521736	-2.24978
URIAAL_R12997	Shc3	2.8044	-4.67496	3.79541	0.00811907	0.521736	-3.80643
URIAAL_R08596	Fam207a	1.22225	2.91877	3.8159	0.00813607	0.521736	-2.47183
URIAAL_R02006	Gpr137b	1.02788	2.91459	3.7788	0.00820462	0.521736	-2.47301
URIAAL_R06865	Tyw1	-1.04222	4.90801	-3.80722	0.00822145	0.521736	-2.24841
URIAAL_R00130	Cel	-1.06668	5.55489	-3.79667	0.00832668	0.521736	-2.22554
URIAAL_R07137	Dok2	1.41674	3.23198	3.79526	0.00834077	0.521736	-2.44086
URIAAL_R04192	Ndfip2	-0.90394	6.20707	-3.79	0.00839386	0.521736	-2.21264
NA	NA	1.25924	3.43393	3.78714	0.00842287	0.521736	-2.41568
URIAAL_R11024	Mic13	1.17831	2.91052	3.77644	0.00853248	0.521736	-2.49991
URIAAL_R12765	Fabp7	-3.34512	-4.4293	-3.77518	0.00854543	0.521736	-3.80486
URIAAL_R00094	Ptgs1	1.64374	3.19759	3.77484	0.008549	0.521736	-2.46591
URIAAL_R12964	Neurod6	2.75026	-4.69346	3.75036	0.00855986	0.521736	-3.81519
URIAAL_R06627	Pds5a	0.823099	3.64343	3.71777	0.00855991	0.521736	-2.39365
URIAAL_R07145	Amigo1	4.50166	-3.78567	3.77345	0.00856335	0.521736	-3.73642
URIAAL_R10804	Slc36a4_1	-3.1292	-3.21538	-3.77118	0.00858691	0.521736	-3.73125
URIAAL_R13052	A2m_3	2.4967	0.106277	3.76961	0.00860324	0.521736	-3.20887
URIAAL_R01099	Atf1	-0.871407	6.64656	-3.76509	0.00865037	0.521736	-2.22849
URIAAL_R14942	Arhgef11_1	3.32515	-2.92987	3.76471	0.00865432	0.521736	-3.6955
URIAAL_R08574	Fzd7	1.65582	0.384411	3.74301	0.00871953	0.521736	-3.09256
URIAAL_R08961	Itk	-2.01969	0.119574	-3.7552	0.00875457	0.521736	-3.185
URIAAL_R00444	Chpt1	1.19413	3.17136	3.7546	0.00876103	0.521736	-2.47586
URIAAL_R10796	Cwc15	-0.816897	6.68137	-3.75095	0.00879978	0.521736	-2.24114
URIAAL_R13313	Creg1	-1.53059	12.0717	-3.74964	0.00881383	0.521736	-2.24158
URIAAL_R06361	Aadat	1.19662	1.02645	3.68807	0.00888421	0.521736	-2.9064
URIAAL_R10883	Yipf4	-0.691917	7.31132	-3.7113	0.00888445	0.521736	-2.24727
URIAAL_R13048	Gas1	1.33598	2.06296	3.7422	0.00889374	0.521736	-2.68001
URIAAL_R00324	Ndufa1	-0.757319	6.96268	-3.7352	0.00891821	0.521736	-2.249
URIAAL_R07265	Rps2	0.933572	9.23649	3.73944	0.00892359	0.521736	-2.23917
URIAAL_R05098	Rgs19	1.29964	3.63822	3.73921	0.0089261	0.521736	-2.42621
URIAAL_R04896	Sik2_0	-1.63699	5.04956	-3.73624	0.00895838	0.521736	-2.30969
NA	NA	-1.02527	5.19556	-3.73227	0.00900163	0.521736	-2.29809
URIAAL_R01690	Anxa2_1	-1.28098	2.21435	-3.73152	0.00900985	0.521736	-2.65519
URIAAL_R08631	Psmd9	-0.606351	8.97916	-3.67164	0.00906937	0.521736	-2.26123
URIAAL_R15373	Setd2	2.12527	-2.40699	3.66928	0.00909629	0.521736	-3.6683
URIAAL_R10807	C2cd2l	-1.53534	6.37194	-3.71983	0.00913884	0.521736	-2.2771
URIAAL_R03418	Pa23	-2.38712	-4.90471	-3.66547	0.00914001	0.521736	-3.83092
URIAAL_R08322	Gp1ba	1.76939	0.678547	3.71893	0.00914888	0.521736	-3.04034
URIAAL_R00334	Mtm1	-1.20064	7.28283	-3.71671	0.00917362	0.521736	-2.2681
URIAAL_R08845	Dbt	1.09498	1.95921	3.66272	0.00923843	0.521736	-2.71117
URIAAL_R15452	Myo10_4	1.11438	3.39105	3.70645	0.0092891	0.521736	-2.4803
URIAAL_R14932	Znf674	4.9588	-1.38789	3.70412	0.00931553	0.521736	-3.52071
URIAAL_R02988	Lrrc4	2.96725	-3.80638	3.70381	0.00931897	0.521736	-3.79886
NA	NA	-0.784298	8.31407	-3.69291	0.00944385	0.521736	-2.28519
URIAAL_R01316	Acadl	0.936747	5.86934	3.69164	0.00945851	0.521736	-2.31133
URIAAL_R13598	Rad18	1.06928	5.64461	3.68844	0.0094955	0.521736	-2.32127
URIAAL_R08882	Mast2_1	-0.774542	5.97324	-3.68488	0.00949945	0.521736	-2.31183
URIAAL_R07602	Cby1	3.08139	-4.00333	3.686	0.00952389	0.521736	-3.81075
URIAAL_R09047	Tent5a_0	-1.3286	5.61077	-3.68299	0.00955896	0.521736	-2.32902
URIAAL_R02120	Bnip3l_0	1.13189	2.35181	3.66398	0.00959923	0.521736	-2.66044
URIAAL_R04426	Chchd6	-0.708337	4.41809	-3.6236	0.00963543	0.521736	-2.39768
URIAAL_R15213	Nfe2l3	2.13234	6.19781	3.67577	0.00964386	0.521736	-2.32619
URIAAL_R03646	Spint1	1.5004	1.08503	3.67445	0.00965938	0.521736	-2.94421
NA	NA	1.26543	3.96255	3.67286	0.00967826	0.521736	-2.44298
URIAAL_R10498	Mapkapk2	2.30218	0.509199	3.67214	0.00968679	0.521736	-3.13316
URIAAL_R12811	Cdc73	-0.825641	6.53199	-3.67085	0.00970205	0.521736	-2.31848
URIAAL_R10671	Tas2r40	-3.7069	-3.0179	-3.66861	0.00972876	0.521736	-3.71818
URIAAL_R13074	Dnajc5_2	2.59239	0.38124	3.66606	0.00975911	0.521736	-3.1882
URIAAL_R12969	Tedc2	1.42561	1.39243	3.6655	0.00976584	0.521736	-2.87341
URIAAL_R14858	Ropn1l	-1.9875	3.70661	-3.66421	0.00978127	0.521736	-2.4909
URIAAL_R06545	Malt1_1	1.97383	-0.356378	3.65858	0.00984909	0.521736	-3.34393
URIAAL_R12103	Col28a1_1	-2.40679	-2.18904	-3.64966	0.00985293	0.521736	-3.65782
URIAAL_R02577	Gtf2f2	-0.765688	5.25682	-3.63681	0.00990111	0.521736	-2.36634
URIAAL_R11979	Gstt1_1	-1.64545	2.14345	-3.65204	0.00992847	0.521736	-2.72953
NA	NA	-2.97154	5.16798	-3.64762	0.00998242	0.521736	-2.40805
URIAAL_R06225	Kif19_0	3.53113	-4.30063	3.64006	0.0100757	0.521736	-3.82453
URIAAL_R09826	Nicn1	1.04538	5.03575	3.63809	0.0101001	0.521736	-2.39132
URIAAL_R04839	Gpr34	-4.22093	-0.556869	-3.6369	0.0101149	0.521736	-3.45791
URIAAL_R07826	S100a11	0.697124	4.58374	3.58196	0.0101576	0.521736	-2.42401
URIAAL_R06062	Cep85	1.55659	2.17654	3.63328	0.01016	0.521736	-2.7346
URIAAL_R15545	Ndufc2	-0.620115	5.98995	-3.57888	0.0101974	0.521736	-2.37336
URIAAL_R01016	Slc26a1	2.14837	-1.91569	3.59686	0.0102068	0.521736	-3.63204
URIAAL_R05828	Tnip1	1.01969	6.23298	3.62772	0.0102298	0.521736	-2.36442
URIAAL_R07858	Rb1cc1	-1.00225	7.53708	-3.62195	0.0103028	0.521736	-2.35713
URIAAL_R05928	Smoc1	-2.69037	-3.69514	-3.60252	0.0104618	0.521736	-3.81349
URIAAL_R00127	Plpp7	1.47569	2.18641	3.60468	0.0105246	0.521736	-2.74887
URIAAL_R14778	Slc39a1	1.89548	1.23175	3.60223	0.0105565	0.521736	-2.96441
URIAAL_R05716	Bag1	-0.864387	4.03366	-3.58607	0.0105669	0.521736	-2.49203
URIAAL_R11268	Commd10	1.51124	2.54814	3.5984	0.0106066	0.521736	-2.6909
URIAAL_R02547	Sumf2	-0.871097	2.93321	-3.54586	0.0106353	0.521736	-2.62254
URIAAL_R00281	Rab14	-0.636178	5.65212	-3.54403	0.0106601	0.521736	-2.4146
URIAAL_R05508	Sec14l1_1	1.63625	4.56714	3.59346	0.0106716	0.521736	-2.46573
URIAAL_R01697	Tmem150a	1.55842	-0.113958	3.54797	0.0106821	0.521736	-3.28409
URIAAL_R07711	Phkb	-1.27038	7.25645	-3.59106	0.0107032	0.521736	-2.38917
URIAAL_R01468	Fbxo3	-1.08981	9.30275	-3.59102	0.0107037	0.521736	-2.38306
URIAAL_R05454	Prdm11	2.07328	-1.22027	3.57172	0.0107221	0.521736	-3.55392
URIAAL_R13070	Tgfa	2.59619	-4.77555	3.55861	0.0108124	0.521736	-3.85552
URIAAL_R09479	Rfxap	-0.830086	6.2513	-3.58212	0.0108224	0.521736	-2.40702
NA	NA	1.09756	2.68486	3.58096	0.0108378	0.521736	-2.67344
URIAAL_R10661	Syb	-1.25728	4.61398	-3.57702	0.0108909	0.521736	-2.47161
URIAAL_R02990	Rara_1	2.34692	-2.40424	3.56101	0.0109064	0.521736	-3.70349
URIAAL_R02247	Eif5	-0.704068	9.36415	-3.56285	0.0110125	0.521736	-2.40655
URIAAL_R12657	Imp3	2.31745	2.91472	3.56802	0.0110132	0.521736	-2.67786
URIAAL_R07814	Cox11	1.10025	4.42741	3.56575	0.0110441	0.521736	-2.49243
NA	NA	1.20457	5.84806	3.56515	0.0110524	0.521736	-2.43221
URIAAL_R13445	Aqp9	-2.26933	-0.839052	-3.56255	0.0110881	0.521736	-3.49953
URIAAL_R04851	Syap1	-0.651747	6.72579	-3.52595	0.0111155	0.521736	-2.42881
URIAAL_R02934	St3gal2_1	1.12136	2.65976	3.56029	0.0111193	0.521736	-2.69252
URIAAL_R07508	Znf385c	3.21477	-3.13883	3.56023	0.01112	0.521736	-3.76585
URIAAL_R03640	C1qtnf4	-2.77254	-3.39116	-3.55969	0.0111276	0.521736	-3.80246
URIAAL_R03337	Cul3	-0.671338	7.02037	-3.53013	0.0112214	0.521736	-2.43177
URIAAL_R00463	Txnrd1	-2.40648	7.1893	-3.54916	0.0112741	0.521736	-2.4331
URIAAL_R11318	Dgkq	1.17344	4.18208	3.54506	0.0113318	0.521736	-2.52996
NA	NA	-1.93246	-0.453639	-3.54144	0.0113829	0.521736	-3.4078
URIAAL_R00614	Csf2ra_0	-3.27948	-2.77117	-3.53883	0.0114199	0.521736	-3.7352
URIAAL_R15266	Ppox_0	1.54652	5.34107	3.53733	0.0114413	0.521736	-2.4759
URIAAL_R07804	Htr3a_0	-2.2839	-1.37102	-3.53413	0.0114869	0.521736	-3.59398
URIAAL_R10591	Cables1	2.30138	2.48964	3.52451	0.0116255	0.521736	-2.77548
URIAAL_R01621	Rora	-2.32067	-1.68278	-3.52314	0.0116454	0.521736	-3.63376
NA	NA	1.42793	2.76034	3.52096	0.011677	0.521736	-2.71184
URIAAL_R01998	Pgbd5	-2.94737	-3.83648	-3.51806	0.0117194	0.521736	-3.83823
URIAAL_R11114	Blk	-2.73783	-0.569864	-3.51805	0.0117196	0.521736	-3.47082
URIAAL_R00198	St6galnac4	1.75332	1.4453	3.51131	0.0118185	0.521736	-2.96253
URIAAL_R12949	Lhfpl2	1.3564	2.3943	3.50782	0.0118702	0.521736	-2.77542
URIAAL_R09036	Srsf10	-0.684584	6.5755	-3.48908	0.011896	0.521736	-2.48029
URIAAL_R02563	Taf15	-1.13426	5.89234	-3.50309	0.0119407	0.521736	-2.49018
URIAAL_R05058	Mcf2l_1	-2.41391	-1.70302	-3.50306	0.011941	0.521736	-3.64044
URIAAL_R11765	Drgx	3.09693	-4.52203	3.50135	0.0119666	0.521736	-3.86344
URIAAL_R08378	Mkln1	-1.10461	9.63356	-3.4983	0.0120124	0.521736	-2.4752
URIAAL_R09965	Arl13a	2.34004	-4.90471	3.44895	0.0120432	0.521736	-3.87558
URIAAL_R02798	Pla2g2e	-3.05534	-3.08165	-3.49533	0.0120571	0.521736	-3.78061
URIAAL_R05279	Cep78	1.71825	1.41775	3.4885	0.0121606	0.521736	-2.98085
URIAAL_R12493	P2ry2	2.06881	5.53939	3.48672	0.0121878	0.521736	-2.52232
URIAAL_R13723	Chst3	3.03438	-2.34125	3.48578	0.0122022	0.521736	-3.70574
URIAAL_R05504	Capn15	1.11565	3.78073	3.47794	0.0123227	0.521736	-2.62112
URIAAL_R14640	Zbtb5_1	-8.2901	2.14702	-3.46979	0.0124493	0.521736	-3.36754
URIAAL_R12302	Sh3bp2	-1.27001	1.76308	-3.46858	0.0124683	0.521736	-2.90928
URIAAL_R06132	Clic4	-0.85715	6.30896	-3.46602	0.0125085	0.521736	-2.51932
URIAAL_R02440	Elf2	-0.820783	8.36683	-3.46257	0.0125627	0.521736	-2.51184
URIAAL_R02094	Leprotl1	-0.697817	5.1412	-3.43212	0.0125927	0.521736	-2.55337
URIAAL_R07357	Mrps35	1.20113	2.70395	3.46014	0.0126011	0.521736	-2.76086
URIAAL_R07658	Fam104a	-0.551291	6.83705	-3.41383	0.0126027	0.521736	-2.5303
URIAAL_R08314	Gatd3a_0	1.40771	2.06275	3.45849	0.0126274	0.521736	-2.86682
URIAAL_R11353	Rhbg	3.54872	-2.01149	3.45737	0.012645	0.521736	-3.66817
URIAAL_R05080	Tnik_0	4.23659	-1.41559	3.45551	0.0126748	0.521736	-3.59991
URIAAL_R00340	Prrg3	-2.09766	-5.04604	-3.40921	0.0126783	0.521736	-3.89005
NA	NA	-3.97554	-2.5069	-3.45445	0.0126917	0.521736	-3.7117
URIAAL_R11122	Gc	3.42125	-1.92865	3.45257	0.0127217	0.521736	-3.66189
URIAAL_R15469	Ppp1r26	2.1683	2.24324	3.45038	0.0127567	0.521736	-2.86386
URIAAL_R06426	Zdhhc1	3.22326	-2.23762	3.44872	0.0127834	0.521736	-3.70001
URIAAL_R10310	Cd226	-3.02172	-0.695462	-3.44841	0.0127885	0.521736	-3.528
URIAAL_R03027	Zfp2	1.70152	1.76644	3.44743	0.0128042	0.521736	-2.93628
URIAAL_R08404	Igfbp1	2.97662	-4.57815	3.44557	0.0128343	0.521736	-3.87779
URIAAL_R03471	Hoxb13a	2.97662	-4.57815	3.44557	0.0128343	0.521736	-3.87779
URIAAL_R09302	Neurl1b	2.97662	-4.57815	3.44557	0.0128343	0.521736	-3.87779
NA	NA	2.8486	-0.562115	3.44293	0.012877	0.521736	-3.49962
URIAAL_R09415	B3gnt2	-1.42862	0.600591	-3.42645	0.0128822	0.521736	-3.17599
URIAAL_R04696	Sulf1	-2.48013	-4.32814	-3.41892	0.0129337	0.521736	-3.87439
URIAAL_R06320	Gse1	2.17687	0.818622	3.43894	0.0129419	0.521736	-3.16153
URIAAL_R09946	Pi4kb_0	-0.832217	7.34334	-3.43665	0.0129793	0.521736	-2.54105
URIAAL_R01554	Tm6sf1	-1.69965	-1.49029	-3.38609	0.0130646	0.521736	-3.64281
URIAAL_R04412	Creld1	1.12413	2.90275	3.43093	0.0130731	0.521736	-2.75596
URIAAL_R12501	Gdpd5_1	2.70722	-4.71512	3.42764	0.0131276	0.521736	-3.88785
URIAAL_R02267	Abhd12_1	2.0567	-5.04604	3.37803	0.0132022	0.521736	-3.89691
URIAAL_R00223	Anapc2	2.04333	4.28239	3.42258	0.0132116	0.521736	-2.64261
URIAAL_R01563	Plekho2	0.980872	2.21291	3.38343	0.0132524	0.521736	-2.85901
URIAAL_R07117	Chrna10	-3.01859	-3.82008	-3.41958	0.0132619	0.521736	-3.85859
URIAAL_R08483	Znf544_0	2.96267	-0.969024	3.41788	0.0132904	0.521736	-3.57291
URIAAL_R00528	Pmp22	1.55053	2.24048	3.41712	0.0133031	0.521736	-2.86807
URIAAL_R10403	Trim27_1	1.22436	7.37232	3.41577	0.0133257	0.521736	-2.56229
URIAAL_R08659	Ddx54	1.45505	4.50575	3.41477	0.0133427	0.521736	-2.62696
URIAAL_R03946	Azi2	-0.782383	6.07983	-3.41217	0.0133865	0.521736	-2.57514
URIAAL_R06569	Cuzd1_0	-2.61096	0.506518	-3.41178	0.0133932	0.521736	-3.27438
URIAAL_R13253	Olig2	2.78758	-4.67496	3.41004	0.0134227	0.521736	-3.88979
URIAAL_R10742	Ddx43	-2.47765	-1.6548	-3.40867	0.0134459	0.521736	-3.66128
URIAAL_R06613	Tmem156	-2.61884	-0.122984	-3.4052	0.013505	0.521736	-3.41238
URIAAL_R05418	Nmt1	1.73462	4.73481	3.40242	0.0135527	0.521736	-2.62977
URIAAL_R05435	Noxa1	2.67783	-3.67467	3.4016	0.0135667	0.521736	-3.85914
URIAAL_R14018	Oaf	2.39143	-4.3484	3.3714	0.0136031	0.521736	-3.88285
URIAAL_R07834	Garem1	1.10293	4.81321	3.39702	0.0136457	0.521736	-2.62421
URIAAL_R13136	Sema5b	2.50443	-4.28797	3.37732	0.0137358	0.521736	-3.88358
URIAAL_R15094	Cyhr1	-0.955294	7.26423	-3.3879	0.0138042	0.521736	-2.59069
URIAAL_R14514	Dcaf10	-0.952304	6.67158	-3.38565	0.0138436	0.521736	-2.59625
URIAAL_R11056	Slc30a9	-0.885339	7.90249	-3.38202	0.0139075	0.521736	-2.59453
URIAAL_R12878	Tspan36	0.874023	4.14471	3.38095	0.0139264	0.521736	-2.67435
URIAAL_R10765	Nr0b2_1	2.51845	-4.81629	3.36445	0.0139412	0.521736	-3.90036
URIAAL_R01354	Csrnp1	1.74001	0.59889	3.37912	0.0139589	0.521736	-3.22456
NA	NA	-2.51395	-4.31399	-3.3651	0.0139839	0.521736	-3.88819
URIAAL_R07934	Wwc2	2.91755	-4.61045	3.37251	0.0140764	0.521736	-3.89496
URIAAL_R04567	Rgs7	2.91755	-4.61045	3.37251	0.0140764	0.521736	-3.89496
URIAAL_R08548	Znf142	0.698767	4.82413	3.3443	0.0140877	0.521736	-2.64982
URIAAL_R07096	Cdkn2b	4.71872	-3.67154	3.36982	0.0141246	0.521736	-3.81142
URIAAL_R07723	Slc9a5_0	1.14104	2.38896	3.36786	0.0141598	0.521736	-2.87256
URIAAL_R04915	Atad2	1.32621	6.09959	3.36768	0.0141631	0.521736	-2.62069
URIAAL_R08558	Chpf	3.33739	-0.222912	3.35624	0.0143706	0.521736	-3.49352
URIAAL_R13652	Ncoa2	1.37441	1.78208	3.35182	0.0144517	0.521736	-2.98488
URIAAL_R06907	Gnmt	-2.31327	4.49737	-3.35156	0.0144564	0.521736	-2.69753
URIAAL_R00986	Ccl4_0	-2.84559	-3.73166	-3.35079	0.0144707	0.521736	-3.87136
URIAAL_R09136	Tfec	-1.81755	0.10084	-3.35056	0.014475	0.521736	-3.35221
URIAAL_R14817	Foxq1	3.08792	-4.52203	3.34808	0.0145206	0.521736	-3.89636
URIAAL_R13411	Man2a2	1.15606	2.93349	3.34628	0.014554	0.521736	-2.81899
NA	NA	-2.02675	2.55403	-3.34623	0.014555	0.521736	-2.88341
URIAAL_R14358	Ddost	0.761679	4.62625	3.33665	0.0145699	0.521736	-2.6804
URIAAL_R10936	Dtx2	1.59787	2.13764	3.34529	0.0145724	0.521736	-2.93558
URIAAL_R09496	Wasf3	-2.47696	-3.55591	-3.33741	0.0146034	0.521736	-3.86659
URIAAL_R01294	Efna1	-2.64662	-4.76338	-3.34355	0.0146047	0.521736	-3.90799
URIAAL_R11584	Llgl1	1.04133	3.1037	3.34332	0.014609	0.521736	-2.80061
URIAAL_R08058	Camta1_0	1.11347	1.59945	3.31969	0.014624	0.521736	-3.0167
NA	NA	1.8541	-1.31197	3.31332	0.0146286	0.521736	-3.64406
URIAAL_R04144	Cep250	1.73393	1.41524	3.34114	0.0146497	0.521736	-3.06842
URIAAL_R12678	Mad2l2	1.31071	2.05027	3.34093	0.0146536	0.521736	-2.94608
URIAAL_R13801	Cnrip1	2.33044	-0.954696	3.33806	0.0147073	0.521736	-3.59656
URIAAL_R11942	Crybb1	3.6833	-4.2344	3.33597	0.0147466	0.521736	-3.88591
URIAAL_R01750	Sec31b	1.07989	5.65251	3.33457	0.0147729	0.521736	-2.65963
NA	NA	-7.3562	1.33351	-3.33224	0.0148168	0.521736	-3.4645
URIAAL_R04479	Hnrnpu	-0.624393	6.46802	-3.30421	0.0148431	0.521736	-2.65917
URIAAL_R01961	Rmnd1	-0.951579	7.29262	-3.33082	0.0148437	0.521736	-2.64876
URIAAL_R02778	Vcan	-1.13695	2.44851	-3.32884	0.0148813	0.521736	-2.89244
URIAAL_R15671	Ecsit	1.01189	3.60943	3.32681	0.0149199	0.521736	-2.76447
URIAAL_R12265	Neuv	2.66406	-3.96141	3.32582	0.0149389	0.521736	-3.88819
URIAAL_R15389	Ccdc142	1.49024	2.38508	3.32569	0.0149413	0.521736	-2.91156
URIAAL_R09159	Ctse_0	-2.3506	-2.25997	-3.32541	0.0149466	0.521736	-3.75691
URIAAL_R12731	Rhog_1	2.50068	3.83067	3.32458	0.0149626	0.521736	-2.76999
URIAAL_R13084	Kctd18	2.03438	-0.616337	3.32188	0.0150141	0.521736	-3.53029
URIAAL_R03405	Heatr6	1.11765	1.88794	3.31287	0.0150196	0.521736	-2.9818
NA	NA	1.5122	0.952709	3.32076	0.0150357	0.521736	-3.16903
URIAAL_R14928	Vcl_1	-1.19206	1.08825	-3.29402	0.0150373	0.521736	-3.12709
NA	NA	-7.42883	1.3873	-3.31643	0.0151192	0.521736	-3.46863
URIAAL_R04521	Hbs1l	-0.616441	7.89765	-3.29534	0.0151382	0.521736	-2.668
URIAAL_R01726	Slc18a2	1.26979	3.29852	3.31423	0.0151617	0.521736	-2.80664
URIAAL_R06386	Polr2b	-0.79358	6.22322	-3.31374	0.0151713	0.521736	-2.67224
URIAAL_R12473	Twsg1	-1.60695	-0.0602568	-3.30451	0.015187	0.521736	-3.39763
URIAAL_R12238	Kcna6	3.47957	-4.32492	3.3127	0.0151915	0.521736	-3.89561
URIAAL_R06832	Abca1_0	1.49936	7.53442	3.31226	0.0152	0.521736	-2.66745
URIAAL_R01604	Nmes1	-1.156	6.55093	-3.31012	0.0152415	0.521736	-2.67384
NA	NA	-1.30735	6.6891	-3.30745	0.0152937	0.521736	-2.67587
URIAAL_R09935	Pkp1	2.58448	-4.77555	3.30405	0.0153142	0.521736	-3.91642
URIAAL_R03556	Mep1b	2.71381	-4.19116	3.3053	0.0153359	0.521736	-3.90043
URIAAL_R02744	Mast4	1.02218	3.21122	3.30227	0.0153956	0.521736	-2.82227
URIAAL_R08797	Fubp1	-1.48982	6.71951	-3.30148	0.0154111	0.521736	-2.68205
NA	NA	-1.06005	2.18718	-3.2925	0.0154358	0.521736	-2.94943
URIAAL_R10368	Pcbp3_0	-3.19277	-3.72883	-3.29912	0.0154577	0.521736	-3.87922
URIAAL_R13578	Ccdc36	-2.8207	-4.67496	-3.29759	0.0154881	0.521736	-3.91432
NA	NA	2.21195	-4.96514	3.25007	0.0156117	0.521736	-3.92254
URIAAL_R05580	Suz12	-1.0805	5.22457	-3.28902	0.0156592	0.521736	-2.71373
URIAAL_R08804	Dmap1	1.32539	6.58848	3.28669	0.015706	0.521736	-2.69784
URIAAL_R06253	Cog1	0.943024	5.65685	3.28627	0.0157145	0.521736	-2.70719
URIAAL_R11623	Usp7	-0.634312	7.99689	-3.27291	0.0157526	0.521736	-2.69787
URIAAL_R10758	Cfap206	-2.20687	0.435783	-3.28343	0.0157719	0.521736	-3.32856
URIAAL_R06302	Dhx38	0.765793	5.32316	3.28173	0.0158064	0.521736	-2.71738
URIAAL_R13477	Parp16	0.897972	4.2759	3.28154	0.0158101	0.521736	-2.75731
URIAAL_R06228	Tepsin	1.19517	6.015	3.28093	0.0158226	0.521736	-2.70846
URIAAL_R07473	Numb	1.69647	0.712811	3.28071	0.015827	0.521736	-3.2479
NA	NA	0.905008	2.43831	3.24616	0.0158392	0.521736	-2.92916
URIAAL_R04257	Spata6	-1.3898	2.22296	-3.27947	0.0158523	0.521736	-2.96488
URIAAL_R02557	Cux1_1	0.921927	4.19009	3.27863	0.0158693	0.521736	-2.76486
URIAAL_R08521	Casp8_1	1.78413	6.17261	3.27839	0.0158741	0.521736	-2.71106
URIAAL_R14525	Enp1	2.32141	0.496439	3.27777	0.0158868	0.521736	-3.32471
URIAAL_R01715	Ldb1	1.99558	6.28056	3.27491	0.0159454	0.521736	-2.71416
URIAAL_R13179	Hibch	1.73429	0.274201	3.26918	0.0160631	0.521736	-3.34872
URIAAL_R07478	Znf668_1	2.40979	1.37979	3.26684	0.0161115	0.521736	-3.15328
URIAAL_R01884	Ccnd3	1.67295	4.14921	3.26217	0.0162085	0.521736	-2.78971		134
URIAAL_R04081	Sbf1_0	1.44938	1.37349	3.26068	0.0162396	0.521736	-3.11986		8
URIAAL_R01314	B4galt3_1	1.38565	3.48376	3.26062	0.0162411	0.521736	-2.83654
URIAAL_R06624	Bod1l	-0.976642	4.72726	-3.25576	0.0163429	0.521736	-2.76114
URIAAL_R06183	Cdhr1	-2.02187	4.09893	-3.25565	0.0163452	0.521736	-2.80279
NA	NA	1.58773	0.919807	3.25392	0.0163817	0.521736	-3.21647
URIAAL_R14088	Capn7	-0.898167	5.33433	-3.25247	0.0164122	0.521736	-2.74652
NA	NA	2.42953	-4.85646	3.23544	0.0164799	0.521736	-3.93109
URIAAL_R05266	Amd1	-1.28341	5.03478	-3.24862	0.0164939	0.521736	-2.75981
URIAAL_R13302	St3gal6	-0.613639	7.6084	-3.23046	0.0165311	0.521736	-2.73911
NA	NA	1.40777	0.739128	3.24592	0.0165514	0.521736	-3.2493
URIAAL_R05879	Rnf145_0	-1.31572	6.69799	-3.24583	0.0165532	0.521736	-2.73911
URIAAL_R02405	Pdss2	1.30124	1.30044	3.24394	0.0165936	0.521736	-3.13836
NA	NA	-1.05099	7.57074	-3.24289	0.0166161	0.521736	-2.73899
URIAAL_R09811	Gmppba	1.05535	3.37478	3.24266	0.0166209	0.521736	-2.85766
URIAAL_R13232	Tbc1d23	-0.899556	7.1473	-3.24266	0.016621	0.521736	-2.74028
URIAAL_R07668	Mafg	-1.36172	7.27417	-3.23926	0.0166939	0.521736	-2.74369
NA	NA	2.64298	-3.97148	3.2383	0.0167148	0.521736	-3.909
URIAAL_R09274	Skil	0.918423	1.55383	3.19784	0.0167286	0.521736	-3.08944
URIAAL_R10015	Cep41	-1.36649	3.13153	-3.23737	0.0167348	0.521736	-2.88776
URIAAL_R02140	Cdhr3	1.70971	-1.27591	3.19106	0.016938	0.521736	-3.67633
URIAAL_R06500	Gclc	-0.991298	9.35954	-3.22793	0.0169399	0.521736	-2.753
URIAAL_R07238	Rhbdf1	2.27794	-1.78314	3.22497	0.0170048	0.521736	-3.73453
URIAAL_R08265	Foxn2_1	1.72554	1.07781	3.22481	0.0170083	0.521736	-3.20643
URIAAL_R00871	Coasy	2.46067	2.39424	3.22006	0.0171131	0.521736	-3.01569
URIAAL_R11726	Cacul1	-0.538826	7.53321	-3.18054	0.0171176	0.521736	-2.77422
URIAAL_R13370	Psma4	-0.868038	7.14081	-3.21963	0.0171225	0.521736	-2.76428
URIAAL_R01689	Anxa2_0	-1.27687	2.4749	-3.21948	0.017126	0.521736	-2.97441
URIAAL_R05110	Gid8	-1.09584	8.01861	-3.21656	0.0171906	0.521736	-2.76582
URIAAL_R08885	Cyp4b1_1	-2.53606	1.43214	-3.21636	0.0171952	0.521736	-3.1752
URIAAL_R15711	Txk_1	-1.88264	-1.27485	-3.20276	0.0172004	0.521736	-3.68395
URIAAL_R15359	Psip1_1	-7.06351	1.14692	-3.21607	0.0172016	0.521736	-3.51854
URIAAL_R12707	Hcn4_1	2.9423	-3.11483	3.21584	0.0172068	0.521736	-3.85547
URIAAL_R04972	Epha1	2.20842	-4.43682	3.18469	0.0172142	0.521736	-3.9279
NA	NA	1.46137	3.36143	3.21535	0.0172177	0.521736	-2.887
URIAAL_R13134	Itgb5	1.8992	-1.21003	3.20582	0.0172183	0.521736	-3.67407
URIAAL_R11662	Sun1_1	-1.11094	8.24426	-3.21368	0.0172547	0.521736	-2.76859
URIAAL_R09349	Htr1b	1.46723	2.58913	3.21262	0.0172786	0.521736	-2.96865
URIAAL_R11487	Maats1_0	-3.03445	-3.80973	-3.21151	0.0173033	0.521736	-3.90635
URIAAL_R07317	Prvu	-2.42005	-3.82008	-3.20685	0.0173063	0.521736	-3.91051
URIAAL_R12134	Mrc1_4	-1.13268	1.21714	-3.18753	0.017318	0.521736	-3.16853
URIAAL_R03380	Plscr2	0.972656	3.61107	3.20525	0.0174441	0.521736	-2.87024
URIAAL_R13497	Map1a_1	2.70374	-4.19672	3.20095	0.0175414	0.521736	-3.92492
URIAAL_R05695	Rnf144b	1.77122	-1.37966	3.17137	0.0175767	0.521736	-3.70126
URIAAL_R10929	Txk_0	-2.1808	-1.07809	-3.19783	0.0176127	0.521736	-3.66349
URIAAL_R03664	Phf21a	1.46244	3.8074	3.19722	0.0176266	0.521736	-2.86772
URIAAL_R07974	Pla2g7	1.71756	4.64287	3.19663	0.01764	0.521736	-2.82725
URIAAL_R00786	Iqsec1	0.959464	1.29929	3.15657	0.0176724	0.521736	-3.16072
URIAAL_R10543	Cd55_0	1.06428	5.31425	3.19412	0.0176975	0.521736	-2.80615
URIAAL_R13259	Ifnar1	0.732099	6.12354	3.19091	0.0177713	0.521736	-2.79875
URIAAL_R06932	Adnp2	-0.757407	7.84124	-3.18999	0.0177924	0.521736	-2.79397
NA	NA	-0.863053	7.49679	-3.18931	0.0178082	0.521736	-2.79526
URIAAL_R07786	Otop3	2.04997	-5.04604	3.14882	0.017856	0.521736	-3.94951
URIAAL_R07729	Calb2	2.04997	-5.04604	3.14882	0.017856	0.521736	-3.94951
URIAAL_R15080	Gtpbp3_0	3.42587	-2.01474	3.18674	0.0178675	0.521736	-3.7507
URIAAL_R03487	Arhgap23	3.1125	-3.98307	3.18416	0.0179275	0.521736	-3.91981
NA	NA	2.14348	1.0213	3.1814	0.017992	0.521736	-3.25944
URIAAL_R05711		-0.943285	5.77786	-3.18071	0.0180081	0.521736	-2.8125
URIAAL_R05316	Ncam1	3.13971	-4.49921	3.1785	0.0180597	0.521736	-3.9343
URIAAL_R07555	Plb	-1.22495	2.51645	-3.17811	0.018069	0.521736	-3.00035
URIAAL_R10611	Atp10a	-2.45874	-1.70404	-3.1764	0.0181091	0.521736	-3.73848
NA	NA	-1.56079	0.633245	-3.17465	0.0181504	0.521736	-3.31433
URIAAL_R11051	Acvr2a_0	-1.18083	4.75463	-3.1746	0.0181515	0.521736	-2.84021
URIAAL_R00307	Fmr1	-0.653037	7.37288	-3.17451	0.0181537	0.521736	-2.81105
URIAAL_R08169	Ap3m2	-0.863246	6.33441	-3.1734	0.0181799	0.521736	-2.81568
NA	NA	-1.16725	0.774376	-3.14138	0.0181965	0.521736	-3.27458
URIAAL_R09188	Crip2	2.97396	-3.816	3.17008	0.0182584	0.521736	-3.91781
URIAAL_R11059	Spata18	1.32601	-0.299411	3.13189	0.0182641	0.521736	-3.50109
URIAAL_R15322	Zscan30_1	2.85972	-1.19638	3.16978	0.0182656	0.521736	-3.6832
NA	NA	2.42564	-4.85646	3.16035	0.0182955	0.521736	-3.95031
URIAAL_R15508	Smpd1	0.844898	4.29587	3.16685	0.0183352	0.521736	-2.86379
URIAAL_R13112	Steap3	2.0789	4.38937	3.16561	0.0183649	0.521736	-2.87175
URIAAL_R05579	Atad5	-1.16745	4.05785	-3.16382	0.0184075	0.521736	-2.88024
URIAAL_R13218	Spice1	1.01046	2.37761	3.16013	0.0184808	0.521736	-3.02797
URIAAL_R13478	Igdcc3	3.63588	-4.24379	3.15895	0.0185245	0.521736	-3.92823
URIAAL_R12602	Nup205_0	0.807177	2.36932	3.12021	0.0185515	0.521736	-3.03141
URIAAL_R08874	B4galt2	1.1398	5.90583	3.15766	0.0185558	0.521736	-2.83546
URIAAL_R14390	Abca1_2	3.60503	-4.26449	3.15763	0.0185565	0.521736	-3.92954
URIAAL_R03086	Dera	-1.28121	1.46583	-3.15752	0.0185591	0.521736	-3.16542
URIAAL_R08224	Comp	1.11366	1.81885	3.15386	0.0186478	0.521736	-3.10937
NA	NA	1.87822	3.19575	3.15232	0.0186852	0.521736	-2.96084
URIAAL_R11054	Slc10a4	3.17707	5.70959	3.15056	0.0187281	0.521736	-2.85615
URIAAL_R03544	Tgm3_0	-1.93895	-1.58211	-3.13954	0.018759	0.521736	-3.74429
URIAAL_R08789	Glmn	-1.80746	5.34267	-3.1488	0.0187712	0.521736	-2.85492
URIAAL_R06817	Arhgap6_1	1.04121	1.06902	3.11086	0.0187852	0.521736	-3.23311
URIAAL_R04007	Rab11fip5	1.2113	6.88424	3.14674	0.0188215	0.521736	-2.8417
URIAAL_R00152	Adgrd2	-2.06741	-1.53947	-3.14584	0.0188436	0.521736	-3.73967
URIAAL_R15258	Serpine1	1.93747	1.60376	3.14569	0.0188474	0.521736	-3.17019
URIAAL_R07732	Fuk	0.958872	4.93187	3.14538	0.0188549	0.521736	-2.86293
URIAAL_R01274	Lrrc4b	2.6149	-1.8497	3.14235	0.0189296	0.521736	-3.76215
URIAAL_R04662	Ptgr2	2.59028	1.07306	3.14198	0.0189386	0.521736	-3.29604
URIAAL_R02385	Sec63	1.2081	2.96614	3.14097	0.0189635	0.521736	-2.98282
URIAAL_R14945	Ppox_1	1.63735	5.08121	3.14059	0.018973	0.521736	-2.86777
URIAAL_R01659	Mef2a	-2.35305	7.73288	-3.13939	0.0190027	0.521736	-2.84833
NA	NA	2.67733	-3.96141	3.13895	0.0190138	0.521736	-3.93254
NA	NA	1.58192	2.9124	3.13697	0.0190629	0.521736	-2.99658
URIAAL_R11720	Calhm3	-2.82884	-4.67088	-3.13651	0.0190742	0.521736	-3.95137
URIAAL_R12549	Pf13	1.45623	-0.232794	3.11144	0.0191245	0.521736	-3.50939
URIAAL_R07937	Fam149a	-2.82868	-4.67088	-3.13418	0.0191323	0.521736	-3.95193
URIAAL_R01941	Sccpdh	1.18719	4.06941	3.13321	0.0191566	0.521736	-2.90856
URIAAL_R07636	Sdk2	2.30945	1.17774	3.13272	0.0191689	0.521736	-3.26282
URIAAL_R04267	Atp6v1g3	-1.96999	-0.744429	-3.13157	0.0191976	0.521736	-3.62706
URIAAL_R07507	Ghdc	3.00621	2.6622	3.13157	0.0191977	0.521736	-3.06327
URIAAL_R03755	Acot7	0.991197	3.69292	3.13137	0.0192027	0.521736	-2.93104
URIAAL_R03212	Ecel1	-2.43121	-3.82759	-3.12938	0.0192526	0.521736	-3.93148
URIAAL_R12518	Fhl1	1.38017	4.03738	3.12886	0.0192656	0.521736	-2.91562
NA	NA	3.82793	-4.13723	3.12874	0.0192687	0.521736	-3.92851
URIAAL_R00238	Ptrh1	2.70413	-2.87882	3.12755	0.0192988	0.521736	-3.86436
URIAAL_R03152	Tango6	1.17738	3.71381	3.12638	0.0193282	0.521736	-2.93549
URIAAL_R03734	Dhrs12	1.23623	6.00709	3.12542	0.0193524	0.521736	-2.86824
URIAAL_R00877	Naglu	1.43117	4.19378	3.12482	0.0193677	0.521736	-2.91249
URIAAL_R10610	Cyfip1	0.875283	4.18569	3.12152	0.0194512	0.521736	-2.91204
NA	NA	0.50472	6.05404	3.08386	0.0194775	0.521736	-2.88291
URIAAL_R02103	Trim2	2.77728	3.75173	3.11932	0.0195072	0.521736	-2.9617
URIAAL_R15445	Bahcc1	2.73972	-3.40124	3.11815	0.0195372	0.521736	-3.90997
URIAAL_R07524	Dnajc7	-0.765811	6.58052	-3.11773	0.019548	0.521736	-2.87297
NA	NA	-0.740681	7.07514	-3.11456	0.0196291	0.521736	-2.87512
NA	NA	2.56311	-0.541783	3.11452	0.0196302	0.521736	-3.61469
URIAAL_R02355	Lcp2_0	0.790336	4.63287	3.11408	0.0196414	0.521736	-2.9016
URIAAL_R12510	Htatsf1	-1.07691	8.59244	-3.1138	0.0196486	0.521736	-2.87455
NA	NA	-0.699263	5.14154	-3.11284	0.0196734	0.521736	-2.89011
NA	NA	-0.543751	6.47672	-3.07581	0.0196893	0.521736	-2.89006
URIAAL_R00556	Fdxr	1.53503	2.66378	3.11132	0.0197124	0.521736	-3.04225
URIAAL_R12424	Wnt11b	1.91716	-0.389577	3.1071	0.0198215	0.521736	-3.56638
NA	NA	2.86816	-1.57529	3.10439	0.0198921	0.521736	-3.74315
URIAAL_R07114	Evi5l	1.67165	-1.7504	3.06407	0.0200024	0.521736	-3.77889
URIAAL_R09356	Elovl4_0	-2.93619	-4.09504	-3.09978	0.0200124	0.521736	-3.94531
URIAAL_R04119	Fgf10	-2.40952	-4.11223	-3.09821	0.0200537	0.521736	-3.94886
URIAAL_R02090	Eif4e_0	-0.997609	7.83123	-3.09796	0.0200603	0.521736	-2.89195
URIAAL_R15339	Znf865_2	2.6841	-1.88536	3.09648	0.0200993	0.521736	-3.77874
URIAAL_R07642	Ccdc40	1.73551	1.29419	3.09375	0.0201711	0.521736	-3.24844
URIAAL_R12972	Abca3	2.00763	3.13816	3.08913	0.0202938	0.521736	-3.0221
URIAAL_R06372	Map9	-2.8127	-4.15078	-3.08705	0.0203493	0.521736	-3.95079
URIAAL_R05603	Wdr83os	1.42917	0.943205	3.08464	0.0204137	0.521736	-3.30526
URIAAL_R03971	Hnrnpr	-1.19248	8.21506	-3.08158	0.0204959	0.521736	-2.90935
URIAAL_R09619	Cenpu	1.03172	3.25494	3.08118	0.0205064	0.521736	-3.00721
URIAAL_R02554	C1qbp	0.907146	2.63607	3.06994	0.0205423	0.521736	-3.06358
URIAAL_R09820	Cyb561d2	0.57659	5.43624	3.04656	0.0205492	0.521736	-2.92923
NA	NA	-1.85105	2.45167	-3.07941	0.0205541	0.521736	-3.0959
URIAAL_R15064	Pbxip1_1	2.42921	-2.13141	3.07789	0.0205954	0.521736	-3.81363
URIAAL_R11071	Ecd	0.969314	5.52696	3.07659	0.0206306	0.521736	-2.92266
URIAAL_R13778	Gpcpd1	-0.973467	8.70956	-3.0765	0.0206328	0.521736	-2.91464
URIAAL_R09644	Stimate_1	-0.875982	4.59515	-3.07585	0.0206506	0.521736	-2.9408
URIAAL_R08416	Hsd17b4	0.865523	5.83546	3.07346	0.0207155	0.521736	-2.92312
URIAAL_R09647	Glt8d1	-0.908629	3.81715	-3.07119	0.0207774	0.521736	-2.97821
URIAAL_R01056	Crk	-0.615816	6.98445	-3.06483	0.020808	0.521736	-2.92434
URIAAL_R04519	Ahi1	-1.1663	4.38293	-3.06989	0.0208129	0.521736	-2.95515
URIAAL_R13857	Ppp1r9a_1	-2.31338	-1.78843	-3.06947	0.0208244	0.521736	-3.7862
URIAAL_R03782	Golim4_0	2.43387	-4.32814	3.06926	0.0208299	0.521736	-3.96226
URIAAL_R08269	Dimt1	0.868739	3.28813	3.0648	0.0209526	0.521736	-3.01821
URIAAL_R10702	Zbtb39	3.18723	-3.42146	3.06379	0.0209805	0.521736	-3.91647
URIAAL_R02421	Frem2_1	2.05388	1.19785	3.06282	0.0210072	0.521736	-3.2941
URIAAL_R00981	Mettl27	3.32501	-3.35043	3.06251	0.0210157	0.521736	-3.90816
URIAAL_R09974	Znf513	0.796766	5.59511	3.0612	0.0210519	0.521736	-2.93767
URIAAL_R08668	Wsb2	1.83016	3.4268	3.06003	0.0210843	0.521736	-3.02146
URIAAL_R07931	Tlr3	-1.42458	-0.740549	-3.02325	0.0211341	0.521736	-3.63961
URIAAL_R02654	Gp1bb	1.50277	5.54605	3.05806	0.021139	0.521736	-2.943
URIAAL_R06560	Bub3	-0.552675	7.01918	-3.03157	0.0211576	0.521736	-2.94457
URIAAL_R15162	Mark2	0.756948	3.77937	3.04606	0.0211648	0.521736	-2.99493
URIAAL_R05433	Sapcd2	3.81583	-3.08802	3.0571	0.0211658	0.521736	-3.87732
URIAAL_R11697	Psd	2.44788	-2.19657	3.05644	0.0211841	0.521736	-3.82694
URIAAL_R12772	Kpna5	-1.02399	7.94217	-3.05414	0.0212485	0.521736	-2.93904
NA	NA	0.603778	6.52302	3.04355	0.021249	0.521736	-2.94391
URIAAL_R01488	Ano5	1.02172	5.1815	3.05401	0.0212521	0.521736	-2.95043
URIAAL_R04962	Ncapd2	0.732211	4.87224	3.05286	0.0212842	0.521736	-2.95637
URIAAL_R02970	Ubap1	-0.726457	5.28597	-3.04934	0.0213832	0.521736	-2.95301
URIAAL_R05425	Dbf4b	-1.24859	1.57697	-3.04848	0.0214073	0.521736	-3.22127
URIAAL_R12471	Rab31	-1.98859	-2.51026	-3.03346	0.021422	0.521736	-3.86863
URIAAL_R14302	Folr1_0	-3.02656	-3.66156	-3.0471	0.0214463	0.521736	-3.94092
URIAAL_R01740	Nfkb2	3.04539	3.16751	3.04556	0.0214897	0.521736	-3.07872
URIAAL_R05096	Tbb6	1.78625	8.43196	3.0451	0.0215029	0.521736	-2.94874
URIAAL_R12821	Kif5b	-0.520066	7.57297	-3.01017	0.021511	0.521736	-2.96084
URIAAL_R04738	Trim55	-2.46473	-4.08424	-3.04288	0.0215658	0.521736	-3.96159
URIAAL_R10391	Slc6a19	-1.61641	-1.284	-3.0105	0.0215682	0.521736	-3.74384
URIAAL_R07184	Haghl	-0.980639	8.27764	-3.04117	0.0216147	0.521736	-2.95297
URIAAL_R01638	Onecut1	3.13502	-2.50245	3.04006	0.0216463	0.521736	-3.84803
NA	NA	0.920925	4.25903	3.03998	0.0216483	0.521736	-2.98767
URIAAL_R05302	Ulk3	0.85977	2.88783	3.03013	0.0216492	0.521736	-3.07303
URIAAL_R03327	Selenot	-0.592215	6.87994	-3.02765	0.021674	0.521736	-2.95975
URIAAL_R11633	Rps15a	-1.04881	9.6655	-3.03834	0.0216953	0.521736	-2.95594
URIAAL_R07716	Heatr3	-0.885576	4.48907	-3.03751	0.0217191	0.521736	-2.98202
URIAAL_R03115	Znf276	0.671023	6.04619	3.0363	0.0217537	0.521736	-2.961
URIAAL_R10722	Slc6a17	2.50154	-4.81629	3.03562	0.0217731	0.521736	-3.98152
NA	NA	-1.30095	7.35665	-3.03529	0.0217828	0.521736	-2.95977
NA	NA	-3.20678	-2.65388	-3.03238	0.0218664	0.521736	-3.86256
NA	NA	2.442	3.58495	3.02779	0.0219994	0.521736	-3.04862
URIAAL_R01669	Rab11a_0	-1.57109	8.40874	-3.02649	0.022037	0.521736	-2.9689
URIAAL_R15280	Obscn_6	2.5721	-4.78188	3.02584	0.0220561	0.521736	-3.98263
URIAAL_R11781	Nkx23	1.97449	2.36478	3.02559	0.0220633	0.521736	-3.15114
URIAAL_R03873	Nap1l4	-0.78231	8.01188	-3.02541	0.0220687	0.521736	-2.97012
URIAAL_R11232	Trdc_1	-1.95839	2.01767	-3.02411	0.0221066	0.521736	-3.19412
URIAAL_R07495	Nrarp	2.57774	2.79665	3.0239	0.0221126	0.521736	-3.11855
URIAAL_R05553	Smtn_0	1.87224	-0.283725	3.02359	0.0221216	0.521736	-3.58319
URIAAL_R04298	Dnajb4	-1.15053	7.00263	-3.02264	0.0221494	0.521736	-2.97368
URIAAL_R03522	Sl9a8	-0.833312	5.46725	-3.02184	0.022173	0.521736	-2.97985
URIAAL_R05313	Mcam	1.09002	4.92	3.02086	0.0222016	0.521736	-2.98899
URIAAL_R14314	Gng12	1.59112	1.1304	3.01951	0.0222413	0.521736	-3.31894
URIAAL_R12512	Vgll1	-1.92168	0.530451	-3.01778	0.0222921	0.521736	-3.43566
URIAAL_R13443	Rnf111	-0.962722	7.81807	-3.01716	0.0223102	0.521736	-2.97913
NA	NA	-1.15402	5.56547	-3.01315	0.022429	0.521736	-2.98867
URIAAL_R11433	Gtf2e1	-1.17764	6.35678	-3.01251	0.0224478	0.521736	-2.9856
URIAAL_R12442	Gpr83_1	-3.48724	-3.78618	-3.01233	0.0224533	0.521736	-3.94756
URIAAL_R04200	Nr1i3	3.63511	-3.06534	3.01144	0.0224797	0.521736	-3.89211
URIAAL_R00335	Mamld1	1.33707	1.02332	3.01126	0.0224851	0.521736	-3.33511
URIAAL_R04040	Msh4	-1.18841	3.75466	-3.01074	0.0225006	0.521736	-3.03968
URIAAL_R08573	Bmpr2	1.5004	3.52763	3.01044	0.0225094	0.521736	-3.05556
URIAAL_R06307	Spata2l	0.685055	4.91467	3.00874	0.0225535	0.521736	-3.00007
URIAAL_R13838	Ppp1cb	-0.764187	8.55476	-3.00597	0.0226429	0.521736	-2.99122
URIAAL_R05112	Lsm14b	-1.77759	4.55233	-3.0047	0.022681	0.521736	-3.01765
URIAAL_R06467	Prmt7	-0.734715	5.26144	-3.00386	0.0227062	0.521736	-3.00044
URIAAL_R14632	Anapc13	1.07751	2.79758	3.0032	0.022726	0.521736	-3.11274
URIAAL_R01086	Utp14a	0.776257	5.95744	3.0031	0.0227289	0.521736	-2.99664
NA	NA	-0.538274	4.72731	-2.96938	0.0227335	0.521736	-3.01866
URIAAL_R04301	Ebna1bp2	1.33167	2.47777	3.00289	0.0227355	0.521736	-3.14568
URIAAL_R13901	Ahr_2	-1.83164	-0.15436	-3.00178	0.0227687	0.521736	-3.5688
URIAAL_R15450	Klk14_1	2.22656	-4.4293	2.98878	0.0228215	0.521736	-3.98232
URIAAL_R15224	Ppp1r18	2.09194	2.6471	2.99862	0.0228641	0.521736	-3.14537
URIAAL_R02224	Papola	-0.869453	7.42271	-2.99558	0.0229563	0.521736	-3.00267
URIAAL_R03044	Cecr2	1.01744	0.757035	2.96208	0.02296	0.521736	-3.3815
URIAAL_R01223	Hapln2	3.1501	-3.96141	2.99363	0.0230159	0.521736	-3.96659
URIAAL_R13029	Arfip2	-1.02291	6.6846	-2.99332	0.0230253	0.521736	-3.0056
URIAAL_R13432	Fbxo22	-0.614146	7.16569	-2.99283	0.0230403	0.521736	-3.00575
NA	NA	3.57753	-2.49639	2.99195	0.023067	0.521736	-3.8533
URIAAL_R11883	Fbxw8	-0.795702	5.90727	-2.98979	0.0231332	0.521736	-3.01097
NA	NA	0.849875	4.55905	2.98818	0.0231827	0.521736	-3.02911
URIAAL_R14346	Sv2a	-3.32582	-1.2237	-2.98808	0.0231858	0.521736	-3.74854
URIAAL_R05727	Bloc1s4	-0.60446	5.9042	-2.97733	0.0232071	0.521736	-3.01669
URIAAL_R11992	Mapk12	-1.06795	3.72927	-2.98738	0.0232073	0.521736	-3.06198
URIAAL_R08123	Knl1_0	-1.7381	2.05407	-2.98699	0.0232192	0.521736	-3.2114
NA	NA	-1.68745	1.99489	-2.98691	0.0232215	0.521736	-3.21822
URIAAL_R13788	Fosl2	2.62008	0.992095	2.98638	0.023238	0.521736	-3.40221
NA	NA	5.34698	-3.33864	2.98619	0.0232439	0.521736	-3.87678
URIAAL_R01713	Mms19	0.695624	5.54329	2.98427	0.0233029	0.521736	-3.01857
URIAAL_R14481	Dazap1	-1.00105	6.72449	-2.98281	0.0233481	0.521736	-3.0169
URIAAL_R13305	Zfp292	-1.13528	5.42795	-2.98136	0.023393	0.521736	-3.02306
URIAAL_R00042	Ccl3	1.82328	-3.33448	2.94727	0.0234273	0.521736	-3.94928
URIAAL_R06943	Bmp3	3.33685	-4.39489	2.97996	0.0234365	0.521736	-3.97942
URIAAL_R00267	Hspa5	-0.569153	7.19156	-2.96577	0.0234716	0.521736	-3.02546
URIAAL_R12982	Lrrc3b_1	2.61432	-0.690912	2.97777	0.0235047	0.521736	-3.69357
NA	NA	1.83213	-1.01556	2.97753	0.0235123	0.521736	-3.73192
URIAAL_R08131	Chst14	1.33461	1.84736	2.97559	0.023573	0.521736	-3.23866
URIAAL_R01244	Btn1a1_3	0.892539	4.61602	2.97547	0.0235765	0.521736	-3.04069
URIAAL_R00725	Cd40	1.11769	2.61527	2.97292	0.0236565	0.521736	-3.15456
URIAAL_R00495	Hsp90b1_0	-1.05168	5.92727	-2.97216	0.0236804	0.521736	-3.02985
URIAAL_R04792	Setd3	-1.12591	5.25222	-2.97086	0.0237215	0.521736	-3.03568
URIAAL_R12723	Slc6a7_1	2.59884	-3.21165	2.96932	0.02377	0.521736	-3.93838
URIAAL_R13005	Ptges3_1	-0.852676	5.97443	-2.9692	0.0237737	0.521736	-3.03275
URIAAL_R11864	Gstt1_0	-2.19342	-2.2402	-2.96914	0.0237757	0.521736	-3.86561
URIAAL_R14772	Fbxo36	-1.04682	1.26353	-2.95143	0.0237894	0.521736	-3.31791
URIAAL_R00496	Hsp90b1_1	-1.00872	5.59424	-2.96741	0.0238301	0.521736	-3.03635
URIAAL_R04060	Rpl7l1	0.500247	6.77776	2.93461	0.0238346	0.521736	-3.04507
URIAAL_R12983	Nr1d1	2.63117	-4.75178	2.9666	0.0238558	0.521736	-3.99633
URIAAL_R13599	Srgap3	1.52264	4.26438	2.96368	0.0239486	0.521736	-3.06529
URIAAL_R06364	Gatb	-1.02383	2.4164	-2.96342	0.023957	0.521736	-3.18016
URIAAL_R09501	Pomp	-0.687735	6.97496	-2.96214	0.0239976	0.521736	-3.03915
URIAAL_R13661	Zfand1	2.67514	-0.381305	2.95965	0.0240772	0.521736	-3.65379
URIAAL_R07990	Ndufb9	-0.569253	8.06235	-2.94983	0.0240812	0.521736	-3.04549
URIAAL_R14396	Pinx1	-1.68706	5.31841	-2.95913	0.0240938	0.521736	-3.04876
URIAAL_R11153	Crygs	-0.717935	2.59754	-2.92559	0.0241293	0.521736	-3.1694
URIAAL_R08256	Gtf2a1l	-2.95233	-3.85498	-2.95739	0.0241497	0.521736	-3.97375
URIAAL_R09841	Tln1	1.86821	5.1931	2.95655	0.0241766	0.521736	-3.05362
URIAAL_R06939	Bmp2k	0.545985	6.38227	2.93157	0.0242496	0.521736	-3.05584
NA	NA	-3.02549	-3.80417	-2.95294	0.0242931	0.521736	-3.9721
URIAAL_R05028	Adprhl1	-1.57815	2.41556	-2.95121	0.0243489	0.521736	-3.19713
URIAAL_R02966	Morc2	-0.861744	7.23055	-2.95011	0.0243845	0.521736	-3.05224
URIAAL_R05850	Nf7o	2.02232	1.93653	2.94859	0.0244341	0.521736	-3.26039
URIAAL_R01348	Wipf1	1.18864	-0.233238	2.91587	0.0244514	0.521736	-3.59055
URIAAL_R02888	Msl1	0.666286	5.84435	2.94759	0.0244667	0.521736	-3.05617
URIAAL_R06682	Tmpo_1	-0.99258	8.3513	-2.94552	0.0245342	0.521736	-3.05745
URIAAL_R14410	Mrps21	-0.582901	5.95497	-2.93197	0.024549	0.521736	-3.06297
URIAAL_R08511	Tsn	-0.63945	5.33324	-2.94132	0.0245894	0.521736	-3.06331
URIAAL_R14763	Zbtb9	1.39938	1.4106	2.94219	0.0246432	0.521736	-3.32251
NA	NA	-2.02631	-2.23771	-2.93996	0.0247164	0.521736	-3.87726
URIAAL_R13178	Nemp2	1.25006	2.09517	2.93992	0.0247176	0.521736	-3.23466
URIAAL_R04174	Vav1	4.72705	-2.21614	2.93991	0.0247178	0.521736	-3.83195
URIAAL_R02538	Atp2a3	1.21097	4.16055	2.93983	0.0247206	0.521736	-3.09023
URIAAL_R07942	Mtmr7	-1.34153	1.58922	-2.93821	0.024774	0.521736	-3.29871
URIAAL_R05012	Dcun1d2	-0.906491	9.2525	-2.93774	0.0247894	0.521736	-3.06612
URIAAL_R07504	Vat1	2.08383	-2.54016	2.93594	0.024849	0.521736	-3.90348
URIAAL_R07304	Adap1_1	-2.46962	-0.526246	-2.93564	0.0248591	0.521736	-3.68375
URIAAL_R13941	Cd36	2.65637	6.63816	2.93258	0.0249606	0.521736	-3.0718
URIAAL_R07477	Znf668_0	2.01756	1.10031	2.93202	0.0249791	0.521736	-3.39496
URIAAL_R01430	Ola1	1.00062	2.79551	2.93078	0.0250203	0.521736	-3.17398
URIAAL_R11254	Ptger4	1.82669	0.552438	2.92879	0.025087	0.521736	-3.47915
URIAAL_R13993	Dia1	-1.59611	3.20777	-2.92872	0.0250893	0.521736	-3.15095
URIAAL_R00373	Znhit3	1.29964	4.50246	2.92811	0.0251097	0.521736	-3.09269
URIAAL_R06825	Mat2a_0	3.23362	3.78083	2.92728	0.0251375	0.521736	-3.14093
URIAAL_R15652	Radil	2.53682	-3.49549	2.9266	0.0251602	0.521736	-3.96997
URIAAL_R10582	Spire1	-1.91224	0.797164	-2.92433	0.0252367	0.521736	-3.44319
URIAAL_R13377	Ccnb2	-1.00747	4.68709	-2.92374	0.0252566	0.521736	-3.09192
URIAAL_R03478	Slc35b1	1.27517	5.64117	2.9221	0.0253119	0.521736	-3.08455
URIAAL_R11712	44990	-0.927461	7.95302	-2.92189	0.025319	0.521736	-3.08338
URIAAL_R07640	Rptor	1.68358	1.18674	2.92175	0.0253237	0.521736	-3.37663
NA	NA	-1.51951	2.64348	-2.92159	0.0253292	0.521736	-3.19961
URIAAL_R15335	Nxph1_1	2.62815	-4.75178	2.91964	0.025395	0.521736	-4.00834
URIAAL_R11120	Ccng2	1.59434	4.15658	2.91959	0.0253967	0.521736	-3.11218
URIAAL_R04185	Apba1_1	-2.8373	-3.60862	-2.91953	0.0253987	0.521736	-3.97409
URIAAL_R10875	Jam3_1	2.15273	-1.06279	2.91895	0.0254183	0.521736	-3.76467
URIAAL_R02540	Cux1_0	3.31342	-1.71298	2.91787	0.0254551	0.521736	-3.81677
URIAAL_R00156	Mvb12b	-1.6606	8.23689	-2.91558	0.0255329	0.521736	-3.09036
URIAAL_R13561	tlr3	-4.15067	-2.58882	-2.91511	0.0255489	0.521736	-3.87837
URIAAL_R01937	Ggps1	-0.745935	6.3678	-2.91313	0.0256166	0.521736	-3.09262
URIAAL_R11309	Slc5a5	2.55288	-4.02381	2.91216	0.0256499	0.521736	-3.99323
URIAAL_R06395	Metap1	0.595212	3.58093	2.87927	0.0257058	0.521736	-3.14685
URIAAL_R01586	Synm	-1.29766	10.0931	-2.90909	0.0257552	0.521736	-3.09768
URIAAL_R07463	Gpr65	-1.18983	0.786282	-2.90264	0.0257621	0.521736	-3.43319
NA	NA	-4.42358	-1.55708	-2.90816	0.0257873	0.521736	-3.79908
URIAAL_R13486	Ctdspl2_0	-1.64106	4.56037	-2.90782	0.025799	0.521736	-3.11325
URIAAL_R14862	Mogs	1.07861	5.26492	2.907	0.0258271	0.521736	-3.10244
NA	NA	1.01442	8.47663	2.90474	0.0259054	0.521736	-3.10248
URIAAL_R08671	Tesc	1.04315	4.18235	2.90408	0.0259283	0.521736	-3.12395
NA	NA	1.02195	1.24356	2.88452	0.0259887	0.521736	-3.36692
URIAAL_R15327	Abca5_3	3.00736	-3.51518	2.90194	0.0260026	0.521736	-3.97136
URIAAL_R14800	Gpr160	0.831924	4.15989	2.90084	0.0260407	0.521736	-3.12713
URIAAL_R13269	Wrb	-0.507089	6.66171	-2.869	0.0260701	0.521736	-3.1184
URIAAL_R10278	Nhlrc1	1.46133	1.92241	2.8996	0.0260839	0.521736	-3.28909
URIAAL_R07215	Cluap1	3.06795	-3.38632	2.89953	0.0260863	0.521736	-3.96225
URIAAL_R03302	Rap2b	1.28485	4.07611	2.89516	0.0262393	0.521736	-3.13722
URIAAL_R12824	Cul2	-0.859301	7.92043	-2.89502	0.0262443	0.521736	-3.11304
URIAAL_R15009	Ikbkg	1.27405	2.65182	2.89476	0.0262532	0.521736	-3.21887
URIAAL_R03116	Spire2	2.86996	-2.69325	2.89396	0.0262816	0.521736	-3.91412
NA	NA	0.926091	4.65193	2.89335	0.0263028	0.521736	-3.12347
URIAAL_R08266	Ppp1r21	-1.01389	6.8358	-2.89276	0.0263238	0.521736	-3.11493
NA	NA	1.69384	3.46599	2.89252	0.0263321	0.521736	-3.16908
URIAAL_R02678	Exoc3l1	0.890125	4.41666	2.89138	0.0263724	0.521736	-3.13009
URIAAL_R10613	Pdcl3	1.56059	2.96758	2.89058	0.0264008	0.521736	-3.20089
URIAAL_R14341	Abhd17a	1.04782	5.24102	2.89006	0.0264191	0.521736	-3.12041
URIAAL_R05547	Gpr61	3.3218	-3.6433	2.88888	0.0264609	0.521736	-3.9772
URIAAL_R00244	Phyhd1	-1.0554	3.18316	-2.88752	0.0265091	0.521736	-3.1849
URIAAL_R01588	Stard5	1.62591	-0.751906	2.88529	0.0265418	0.521736	-3.72196
URIAAL_R09039	Hmgcl	-0.751411	5.19954	-2.88646	0.0265465	0.521736	-3.12407
URIAAL_R12981	Ikzf3	-2.20524	-0.753738	-2.8843	0.0266235	0.521736	-3.7351
URIAAL_R13413	Tubgcp4	0.786575	3.80499	2.8842	0.0266269	0.521736	-3.15561
URIAAL_R10567	Ptpn2	-1.03375	9.24036	-2.88351	0.0266518	0.521736	-3.12619
URIAAL_R12462	Cep192_0	-1.31714	1.17291	-2.88263	0.026683	0.521736	-3.39439
URIAAL_R13256	Son	-1.34165	7.58663	-2.88188	0.0267098	0.521736	-3.12732
URIAAL_R06289	Pkd1l2	2.21669	-4.43682	2.87765	0.0267204	0.521736	-4.01398
URIAAL_R13531	Actr8	0.610357	6.62164	2.87981	0.0267841	0.521736	-3.12905
NA	NA	-1.85358	0.653725	-2.87969	0.0267883	0.521736	-3.49271
URIAAL_R00647	Rpl39	0.820769	7.44771	2.8748	0.0269643	0.521736	-3.13512
URIAAL_R12489	Ankrd12	-1.48657	5.41145	-2.87297	0.0270308	0.521736	-3.13808
URIAAL_R13476	Cers3	-2.06772	2.57547	-2.87214	0.0270607	0.521736	-3.25542
URIAAL_R12638	Apob	2.77483	-3.61424	2.87191	0.0270693	0.521736	-3.98837
URIAAL_R02253	Lgals3	-1.35947	1.35485	-2.87104	0.0271009	0.521736	-3.37767
URIAAL_R00700	Pttg1ip	1.694	-0.776061	2.86994	0.0271408	0.521736	-3.73397
URIAAL_R05958	Riox1	1.9203	1.47728	2.8692	0.0271678	0.521736	-3.37729
URIAAL_R12308	Reep1	1.14579	6.1645	2.86901	0.0271748	0.521736	-3.14067
URIAAL_R03208	Lpp	1.1742	2.41763	2.86866	0.0271873	0.521736	-3.25965
URIAAL_R00126	Aif1l	-1.60327	-0.370568	-2.8686	0.0271896	0.521736	-3.66334
NA	NA	1.2259	3.93931	2.86778	0.0272194	0.521736	-3.16829
URIAAL_R10345	Gmpr	2.35763	4.02627	2.86719	0.0272411	0.521736	-3.17426
URIAAL_R00480	Eps8	-2.65129	-2.93635	-2.86628	0.0272742	0.521736	-3.94739
URIAAL_R02125	Rdh12_0	1.77644	0.386086	2.86622	0.0272764	0.521736	-3.5413
URIAAL_R03970	Cited3	1.07351	5.74887	2.86545	0.0273048	0.521736	-3.14477
URIAAL_R08704	Aldh2	1.25763	7.30546	2.86485	0.0273268	0.521736	-3.14596
URIAAL_R06236	Gcgr_0	3.33428	-1.46094	2.86415	0.0273522	0.521736	-3.8146
URIAAL_R14522	Spinw	-1.26336	3.93816	-2.86382	0.0273646	0.521736	-3.17245
NA	NA	1.18329	1.64687	2.86361	0.0273721	0.521736	-3.34337
URIAAL_R07240	Srebf1	2.60117	1.68103	2.86347	0.0273775	0.521736	-3.3729
URIAAL_R11467	Adprh	2.92763	0.858031	2.86296	0.0273962	0.521736	-3.51478
URIAAL_R02848	Tagln2	1.76255	1.91218	2.86177	0.0274398	0.521736	-3.32453
URIAAL_R00431	Brip1	-1.72877	3.29023	-2.86136	0.0274549	0.521736	-3.20745
NA	NA	-1.56692	0.874632	-2.86129	0.0274576	0.521736	-3.45874
URIAAL_R13217	Naa50	-1.4719	3.99674	-2.86091	0.0274717	0.521736	-3.17434
URIAAL_R14391	Elp3	-0.497804	5.51713	-2.83036	0.0274904	0.521736	-3.16112
URIAAL_R11320	Mtap	1.08468	1.50002	2.85972	0.0275153	0.521736	-3.36319
URIAAL_R01273	Sptb	2.88494	8.04021	2.85835	0.027566	0.521736	-3.15327
URIAAL_R10648	Slc25a6	0.838381	8.49746	2.85833	0.0275669	0.521736	-3.15407
URIAAL_R11686	Trrap	1.34344	2.2835	2.85805	0.0275772	0.521736	-3.28281
URIAAL_R10826	Ube4a	0.978005	6.59659	2.85286	0.0277701	0.521736	-3.15859
URIAAL_R03036	Creb3l2	0.764105	1.70761	2.82131	0.0278348	0.521736	-3.34335
URIAAL_R07479	Znf618	1.04414	1.12891	2.83766	0.0278585	0.521736	-3.41814
URIAAL_R07023	Cacybp	-0.824298	7.29403	-2.84906	0.0279124	0.521736	-3.16351
URIAAL_R10749	Prdm13	4.06704	-4.00409	2.84843	0.027936	0.521736	-3.99081
NA	NA	-1.53484	0.858216	-2.8474	0.0279746	0.521736	-3.46934
URIAAL_R14414	Tars_1	1.08679	3.20753	2.84723	0.027981	0.521736	-3.22046
URIAAL_R13800	C1d	-0.934224	6.10315	-2.84682	0.0279962	0.521736	-3.16484
URIAAL_R11184	Znf24	1.40013	1.53264	2.84648	0.0280092	0.521736	-3.37408
URIAAL_R13607	Frmd4b_0	1.40586	2.31386	2.84568	0.0280391	0.521736	-3.29011
URIAAL_R13491	Unc45a	0.847923	4.5811	2.84502	0.028064	0.521736	-3.17409
URIAAL_R08865	Zzz3	-1.14465	6.21141	-2.84492	0.0280681	0.521736	-3.16696
URIAAL_R11560	Usp31	0.583281	5.09672	2.82888	0.0280831	0.521736	-3.17432
URIAAL_R06803	Pip5k1b	1.63026	5.48802	2.84409	0.0280991	0.521736	-3.16867
URIAAL_R15378	Pld3	1.89955	0.128552	2.84201	0.028178	0.521736	-3.60268
URIAAL_R05630	Kdm1b	1.55283	3.75391	2.84199	0.0281789	0.521736	-3.20203
URIAAL_R01323	Vil1_0	-1.4927	-2.30561	-2.81171	0.0282052	0.521736	-3.92254
URIAAL_R00003	Znf777_0	0.808462	2.25588	2.81597	0.0282493	0.521736	-3.29752
URIAAL_R12051	Dnajb9	-0.812204	5.82073	-2.83927	0.0282818	0.521736	-3.173
URIAAL_R11077	Pla2g12b	2.21439	-4.43682	2.83826	0.0282901	0.521736	-4.02559
URIAAL_R01596	Trpm7	1.84412	4.70272	2.83625	0.0283969	0.521736	-3.18425
URIAAL_R11242	Unc13b	1.77318	-1.26564	2.83612	0.0284019	0.521736	-3.82143
URIAAL_R04660	Cdan1	1.37005	1.45252	2.83598	0.0284072	0.521736	-3.39031
URIAAL_R09849	Tram1l1_1	-0.956483	4.48247	-2.83459	0.0284604	0.521736	-3.1866
NA	NA	1.14738	3.19453	2.83458	0.0284609	0.521736	-3.23302
URIAAL_R14881	Chtop	0.508402	7.11426	2.80986	0.0285246	0.521736	-3.19035
URIAAL_R10964	Rasa4b	3.21197	-3.93653	2.83246	0.0285421	0.521736	-4.00882
URIAAL_R00455	Mical3	0.816188	7.07466	2.83153	0.0285779	0.521736	-3.1827
URIAAL_R14291	Ensa	-0.64073	4.02603	-2.811	0.0286332	0.521736	-3.20606
URIAAL_R14288	Hormad1	1.78999	0.660641	2.8301	0.0286332	0.521736	-3.51945
URIAAL_R05211	Plpp5	-0.992335	1.64267	-2.82295	0.0286944	0.521736	-3.36791
URIAAL_R11480	Sh2d1b	2.70847	-0.130571	2.82841	0.0286983	0.521736	-3.67924
URIAAL_R01835	Cfap61	-1.36101	0.769888	-2.82779	0.0287222	0.521736	-3.49063
URIAAL_R05348	Dgat2_0	2.31687	2.19671	2.8273	0.0287411	0.521736	-3.33355
NA	NA	1.26174	2.67861	2.82702	0.0287521	0.521736	-3.27459
URIAAL_R14884	Ppp1r37	1.32485	6.42008	2.82485	0.0288362	0.521736	-3.18911
URIAAL_R04258	Slc6a9	2.11285	3.31441	2.82461	0.0288453	0.521736	-3.24439
URIAAL_R05765	Ccdc34	-1.16265	0.637363	-2.81401	0.0289042	0.521736	-3.50972
URIAAL_R03442	Synrg	1.40035	1.71082	2.8195	0.0290449	0.521736	-3.3726
NA	NA	1.14147	2.80099	2.81901	0.0290638	0.521736	-3.27161
URIAAL_R09726	Enah	2.38395	2.95884	2.8166	0.0291585	0.521736	-3.27736
URIAAL_R07973	Tnfrsf21	1.79068	-0.367177	2.81491	0.0292249	0.521736	-3.69308
URIAAL_R02387	Rtn4ip1	-0.80504	6.94942	-2.81407	0.029258	0.521736	-3.20193
URIAAL_R13073	Cox7c	0.919719	7.4044	2.81327	0.0292895	0.521736	-3.2034
URIAAL_R11971	Uqcr10	-0.699538	7.06782	-2.81211	0.0293356	0.521736	-3.2043
NA	NA	-0.594722	4.58608	-2.79251	0.0293657	0.521736	-3.21444
URIAAL_R15648	Zbed4_1	1.52029	1.00303	2.81084	0.0293858	0.521736	-3.47342
URIAAL_R09746		-0.697078	2.41118	-2.78189	0.0293893	0.521736	-3.30902
URIAAL_R03934	Cnot10	-1.38577	5.4592	-2.80902	0.0294578	0.521736	-3.20609
URIAAL_R08809	Cyp4b1_0	-3.35097	4.56415	-2.80892	0.0294619	0.521736	-3.22436
URIAAL_R12899	Avl9	-0.758823	7.28982	-2.80785	0.0295044	0.521736	-3.20934
URIAAL_R04397	Gata2	1.6084	2.45068	2.80757	0.0295156	0.521736	-3.31271
URIAAL_R08825	Mrpl37	1.24594	3.38192	2.80682	0.0295454	0.521736	-3.24986
URIAAL_R05294	Sema7a	0.920328	3.0007	2.80469	0.0296306	0.521736	-3.27011
NA	NA	-0.602018	3.65468	-2.77591	0.0296329	0.521736	-3.24523
URIAAL_R02576	Gpalpp1	-0.685912	6.597	-2.80447	0.0296391	0.521736	-3.21205
URIAAL_R00579	Lonrf2	0.855482	5.72111	2.80414	0.0296525	0.521736	-3.21117
URIAAL_R05291	Act5	-0.72964	4.15338	-2.80408	0.029655	0.521736	-3.22361
URIAAL_R07152		-1.15345	5.50407	-2.8038	0.029666	0.521736	-3.21157
URIAAL_R10928	Yipf7	-2.12592	-5.02754	-2.79345	0.0297321	0.521736	-4.0474
URIAAL_R01580	Mns1	-0.925315	4.18617	-2.80186	0.0297438	0.521736	-3.22554
URIAAL_R09630	Cep135	-1.17354	3.52547	-2.80178	0.029747	0.521736	-3.24735
URIAAL_R08582	Hspe1	-0.830643	6.91545	-2.80086	0.029784	0.521736	-3.21655
URIAAL_R00408	Smg8	0.824205	3.83075	2.79944	0.029841	0.521736	-3.23733
URIAAL_R00118	Asb6	1.59104	7.1143	2.79933	0.0298456	0.521736	-3.21831
URIAAL_R09839	Avd_3	3.12303	-2.89101	2.79817	0.0298925	0.521736	-3.95451
URIAAL_R08621	Scarb1	-1.80404	3.2939	-2.79816	0.0298927	0.521736	-3.26596
URIAAL_R12478	Smchd1	-0.665572	7.1199	-2.79784	0.0299059	0.521736	-3.22027
URIAAL_R00560	Epn3	1.76873	2.88348	2.79762	0.0299144	0.521736	-3.29131
URIAAL_R08448	Wasf2	0.613332	3.99736	2.77229	0.0299474	0.521736	-3.24171
URIAAL_R03625	Tada1	-0.657816	6.24129	-2.79655	0.029958	0.521736	-3.22021
URIAAL_R01212	Abcg2	2.31443	2.68064	2.79542	0.0300036	0.521736	-3.31522
URIAAL_R11963	Ddx51	-0.774456	5.75051	-2.7954	0.0300042	0.521736	-3.22073
URIAAL_R13481	Tipin	1.60401	3.05785	2.79448	0.0300417	0.521736	-3.28129
URIAAL_R02692	Hacl1	1.34057	2.72028	2.79408	0.030058	0.521736	-3.30106
URIAAL_R10545	Smpd2	3.17582	-2.24245	2.79248	0.0301231	0.521736	-3.9057
URIAAL_R01309	Grm7_2	-3.73265	-1.15925	-2.79227	0.0301315	0.521736	-3.81806
URIAAL_R14112	Pigt	0.991093	4.0044	2.79167	0.030156	0.521736	-3.2405
URIAAL_R15422	Tmem173_1	3.76431	-1.30336	2.78914	0.0302589	0.521736	-3.82921
URIAAL_R03565	Impact	1.08247	2.85417	2.78782	0.0303132	0.521736	-3.29542
URIAAL_R05239	Rab5a	-0.700117	5.62544	-2.787	0.0303467	0.521736	-3.22978
URIAAL_R07201	Abcc1_1	-1.01718	7.39973	-2.78646	0.0303691	0.521736	-3.23333
URIAAL_R06245	Faap100	1.68211	2.30075	2.78464	0.0304436	0.521736	-3.34565
URIAAL_R06749	Mcu	0.918576	4.03979	2.78429	0.0304583	0.521736	-3.24671
URIAAL_R14730	Fkrp	1.33605	2.90974	2.78275	0.0305214	0.521736	-3.29809
NA	NA	-3.18651	-2.3708	-2.78233	0.030539	0.521736	-3.92088
NA	NA	-1.44954	8.33224	-2.78226	0.0305417	0.521736	-3.23901
URIAAL_R10383	Mbp	-1.47105	0.693137	-2.7821	0.0305484	0.521736	-3.53474
NA	NA	1.10512	5.71499	2.78177	0.0305619	0.521736	-3.23548
URIAAL_R11628	Zc3h7a	-0.891471	7.96473	-2.78103	0.0305928	0.521736	-3.24019
URIAAL_R11065	Nipal1	1.80422	-5.16887	2.75258	0.030605	0.521736	-4.05558
URIAAL_R12808	Rgs1	-2.75927	-0.316144	-2.78032	0.0306219	0.521736	-3.73014
URIAAL_R00912	Slc38a3_0	2.3593	-3.58193	2.78009	0.0306317	0.521736	-4.01656
URIAAL_R13185	Itgb2	1.08384	4.5051	2.77926	0.030666	0.521736	-3.24345
URIAAL_R14113	Dtnbp1_1	1.26956	2.61828	2.77825	0.0307078	0.521736	-3.32058
URIAAL_R06328	Cog8	0.768033	5.12317	2.77426	0.0308739	0.521736	-3.24381
URIAAL_R08855	Gtf2b	-0.572717	5.91113	-2.76903	0.0308745	0.521736	-3.24621
NA	NA	-1.74662	3.07521	-2.77382	0.0308924	0.521736	-3.2997
URIAAL_R09088	Zbtb8a_1	-1.89654	0.599095	-2.77368	0.0308984	0.521736	-3.56561
URIAAL_R05182	Adcy6_2	2.21795	0.0943602	2.77323	0.0309172	0.521736	-3.65145
URIAAL_R12249	Cd9	0.977766	4.68026	2.77248	0.0309484	0.521736	-3.24829
URIAAL_R02640	Rundc3a	1.86432	6.68527	2.77203	0.0309673	0.521736	-3.24766
URIAAL_R00292	Ccdc180_1	-2.70461	0.102015	-2.77194	0.0309713	0.521736	-3.67017
URIAAL_R07019	Coa4	-0.698547	5.06825	-2.77182	0.0309763	0.521736	-3.24653
URIAAL_R06218	Psmd12	-0.55246	6.26523	-2.76312	0.0309862	0.521736	-3.25125
URIAAL_R14426	Tbc1d2	1.6174	2.10203	2.77018	0.0310449	0.521736	-3.37479
URIAAL_R04392	Arl8b	-0.890787	4.82439	-2.76867	0.0311087	0.521736	-3.25107
URIAAL_R11550	Slc9a3r2	0.964163	6.49543	2.76849	0.0311162	0.521736	-3.25167
NA	NA	1.39035	1.77385	2.76844	0.031118	0.521736	-3.40444
URIAAL_R06249	Gna13	-0.933022	6.39503	-2.76766	0.0311511	0.521736	-3.25239
URIAAL_R07914	Abhd18	-0.828124	3.65375	-2.76742	0.031161	0.521736	-3.27437
URIAAL_R01886	Bcl2l15	-0.866045	1.41475	-2.73926	0.0311747	0.521736	-3.44001
URIAAL_R10451	Pmm1	2.6694	-0.431074	2.76652	0.0311991	0.521736	-3.75147
URIAAL_R10062	Macf1_2	-1.58587	0.0207536	-2.76626	0.0312103	0.521736	-3.64983
URIAAL_R04890	Hsf2bp	-2.79523	-2.54856	-2.76581	0.0312291	0.521736	-3.94628
URIAAL_R11221	Ppp2ca_1	-0.621928	5.50348	-2.76561	0.0312377	0.521736	-3.25297
URIAAL_R11454	Sft2d2	-2.31687	-1.7285	-2.76438	0.0312897	0.521736	-3.88818
URIAAL_R11113	Mtmr9_1	-3.19652	6.35202	-2.76403	0.0313046	0.521736	-3.25474
URIAAL_R10819	Bcl9l	3.65323	-2.19887	2.76365	0.0313207	0.521736	-3.90584
URIAAL_R07226	Flii	1.42645	5.70444	2.76344	0.0313295	0.521736	-3.25535
URIAAL_R06371	Bank1	-1.64696	-1.17208	-2.75844	0.0313754	0.521736	-3.83777
URIAAL_R01622	Bnip2	-0.932005	7.07827	-2.76207	0.0313877	0.521736	-3.26009
URIAAL_R08250	Pcare	-3.09045	-4.03474	-2.76138	0.0314169	0.521736	-4.03295
URIAAL_R10645	Tubgcp5	-0.605364	6.01527	-2.76084	0.0314399	0.521736	-3.25915
URIAAL_R08354	Adamts10	3.68687	-2.75377	2.75936	0.031503	0.521736	-3.94801
URIAAL_R05799	Cyp2r1	-1.04084	3.0963	-2.75733	0.0315897	0.521736	-3.3086
URIAAL_R02418	Tnip3	2.28132	0.0721554	2.75581	0.031655	0.521736	-3.66702
URIAAL_R00102	Rgs3	2.12393	-3.45998	2.7539	0.0317372	0.521736	-4.02066
URIAAL_R06337	Taf4_1	-0.694823	3.03115	-2.73061	0.0317642	0.521736	-3.31929
URIAAL_R02821	Pias4	-0.83304	5.27192	-2.75288	0.0317809	0.521736	-3.26662
URIAAL_R00353	Zbtb33	-0.855793	7.12567	-2.75063	0.0318782	0.521736	-3.27303
URIAAL_R11363	Cdc37l1_1	-4.46077	-1.38072	-2.74961	0.0319221	0.521736	-3.84846
URIAAL_R03141	Zfpm1	1.71807	3.73877	2.74854	0.0319686	0.521736	-3.29392
URIAAL_R05194	Kansl1	-1.6558	8.23578	-2.74788	0.0319973	0.521736	-3.27759
URIAAL_R13710	Pdlim1	1.15926	4.39925	2.74757	0.0320106	0.521736	-3.27763
URIAAL_R03073	Dennd5b	-1.77243	-2.14853	-2.7383	0.0320153	0.521736	-3.93747
URIAAL_R09532	Tmco3	-1.01428	7.54072	-2.74571	0.0320916	0.521736	-3.27929
URIAAL_R09163	Tbc1d15	-1.31127	9.32185	-2.74492	0.0321259	0.521736	-3.28165
URIAAL_R01946	Ccsap	1.68477	-0.744993	2.74424	0.0321554	0.521736	-3.78445
URIAAL_R05736		1.32692	1.04586	2.74358	0.0321844	0.521736	-3.5076
NA	NA	-0.89182	6.43094	-2.74263	0.032226	0.521736	-3.28032
URIAAL_R00467	Spic	-2.43252	-4.10064	-2.74239	0.0322364	0.521736	-4.04274
URIAAL_R03635	Abl2	1.53778	-2.23644	2.71496	0.0322435	0.521736	-3.94845
URIAAL_R04677	Lrrcc1	-0.954787	4.70357	-2.74075	0.0323083	0.521736	-3.28134
URIAAL_R14130	Asb16	-2.25552	0.135721	-2.74028	0.0323286	0.521736	-3.66517
URIAAL_R09540	Lamp1	-0.717672	7.26124	-2.74014	0.0323347	0.521736	-3.28511
URIAAL_R15675	Cartpt	2.85106	-3.59032	2.73979	0.0323504	0.521736	-4.02461
URIAAL_R03008	Cfd_1	1.2326	-0.765142	2.70975	0.0324776	0.521736	-3.78233
URIAAL_R10429	Csnk1e	1.25492	2.68257	2.73689	0.0324778	0.521736	-3.35244
URIAAL_R04623	Ndufaf1	-0.643757	4.78446	-2.73633	0.0325024	0.521736	-3.28529
URIAAL_R09111	Mettl25	-0.608178	4.38764	-2.72353	0.0325072	0.521736	-3.29289
NA	NA	3.1419	0.389985	2.7357	0.0325304	0.521736	-3.66441
URIAAL_R08696	Gpn3	-0.563053	6.6011	-2.73275	0.0326284	0.521736	-3.29139
URIAAL_R03584	Rab2a	-0.765196	5.52717	-2.73278	0.0326596	0.521736	-3.28877
URIAAL_R14347	Ca14	1.13398	0.395585	2.71735	0.0327121	0.521736	-3.60322
URIAAL_R10730	Pim1_1	1.46142	5.63024	2.73137	0.032722	0.521736	-3.29018
URIAAL_R03242	Rubcn	0.822126	5.18011	2.73131	0.0327248	0.521736	-3.28991
URIAAL_R07765	Cox10	0.742991	2.88362	2.7174	0.0327514	0.521736	-3.34587
URIAAL_R07870	Asph	-1.56987	-0.857293	-2.73001	0.0327567	0.521736	-3.80541
URIAAL_R03949	Samhd1	-0.913532	6.97379	-2.72777	0.0328825	0.521736	-3.29832
URIAAL_R14706	Isg20l2	2.51654	-0.66493	2.72625	0.0329505	0.521736	-3.79797
URIAAL_R12978	Cers4_1	2.05446	2.89842	2.7262	0.0329529	0.521736	-3.35705
NA	NA	1.48977	0.829682	2.72502	0.0330058	0.521736	-3.55287
NA	NA	-2.85619	-3.50556	-2.72476	0.0330175	0.521736	-4.02455
NA	NA	2.1093	-2.27895	2.72455	0.0330266	0.521736	-3.94969
URIAAL_R11378	Ift57	-1.19243	2.69534	-2.72365	0.0330671	0.521736	-3.36275
URIAAL_R07531	Psmc3ip	0.694974	3.18724	2.70595	0.0331008	0.521736	-3.33906
URIAAL_R13402	Snapc5	-0.638135	7.05916	-2.72161	0.0331591	0.521736	-3.30554
URIAAL_R05446	Api5	-0.749169	7.06873	-2.72105	0.0331844	0.521736	-3.30616
URIAAL_R07464	Spata7_0	-2.35597	-3.45783	-2.71981	0.0332402	0.521736	-4.02891
URIAAL_R01062	Tpst1	2.41939	0.0535566	2.71952	0.0332533	0.521736	-3.69726
URIAAL_R10701	Stat6_1	1.54289	1.07627	2.7185	0.0332992	0.521736	-3.52431
URIAAL_R02760	Cd93	1.25662	2.42603	2.7173	0.0333536	0.521736	-3.38673
URIAAL_R15155	Grin2d	-2.82994	-3.43309	-2.71641	0.033394	0.521736	-4.0232
URIAAL_R03794	Rmdn3	0.917898	4.57424	2.71592	0.0334165	0.521736	-3.30832
URIAAL_R08457	Cyp27b1	2.76923	-4.15547	2.7158	0.033422	0.521736	-4.05009
URIAAL_R00971	Hip1	1.75813	4.08903	2.71517	0.0334507	0.521736	-3.31751
URIAAL_R01283	Calr	-0.938502	6.57336	-2.71448	0.0334821	0.521736	-3.31213
URIAAL_R04038	Tnni3k	2.08237	-5.02754	2.70639	0.0335493	0.521736	-4.07165
URIAAL_R02853	Ptpn11_1	1.67771	4.87931	2.71275	0.0335607	0.521736	-3.31073
URIAAL_R05649	Clptm1l	-0.574412	5.64118	-2.70857	0.0336127	0.521736	-3.3136
NA	NA	-1.73528	3.22388	-2.71143	0.0336211	0.521736	-3.3495
URIAAL_R14517	Pias3	1.48533	2.4539	2.71104	0.0336392	0.521736	-3.39286
URIAAL_R13662	Snx16	-1.12997	2.45703	-2.71097	0.0336422	0.521736	-3.38887
URIAAL_R05817	Rgs14	1.26977	2.10343	2.71091	0.033645	0.521736	-3.41747
URIAAL_R05416	Xpo1	-0.730408	7.13004	-2.7107	0.0336546	0.521736	-3.31797
URIAAL_R06536	Bbs4	-1.13895	5.9421	-2.70874	0.0337446	0.521736	-3.31625
URIAAL_R06147	Sirt1	-0.695373	7.72386	-2.70867	0.0337474	0.521736	-3.3215
URIAAL_R05705	Tent4a	-0.733083	4.84818	-2.70846	0.0337575	0.521736	-3.31475
URIAAL_R06359	Tmem192	-1.07458	4.52635	-2.70836	0.033762	0.521736	-3.31677
URIAAL_R00302	Xiap	-0.699969	6.06518	-2.70834	0.0337629	0.521736	-3.31741
URIAAL_R00298	Magt1	-0.828996	6.94379	-2.70815	0.0337714	0.521736	-3.32033
URIAAL_R13615	Uba3	-0.604085	6.55425	-2.70697	0.0338259	0.521736	-3.32062
URIAAL_R02795	Dnajc16	0.63129	4.37582	2.70079	0.0338326	0.521736	-3.32136
URIAAL_R07641	Slc26a11	2.25467	-1.45339	2.70618	0.0338619	0.521736	-3.88701
URIAAL_R08736	Rnf10	1.05974	8.16316	2.7051	0.0339119	0.521736	-3.32611
URIAAL_R08512	Kalrn	0.764365	5.70889	2.70345	0.0339884	0.521736	-3.32149
URIAAL_R00282	Pnpla7	-0.989846	4.61451	-2.70337	0.0339917	0.521736	-3.32124
URIAAL_R07820	Sphk1	1.25339	6.04884	2.7029	0.0340136	0.521736	-3.32296
URIAAL_R00327	Vbp1	-1.03252	6.38875	-2.70188	0.0340609	0.521736	-3.32557
URIAAL_R13702	Ogdhl	-1.76348	-1.37616	-2.70106	0.0340988	0.521736	-3.8878
URIAAL_R05848	Clk4_0	-0.684262	7.96293	-2.70087	0.0341079	0.521736	-3.33074
URIAAL_R01130	Mob1a	0.972599	7.41283	2.69962	0.0341661	0.521736	-3.33103
URIAAL_R15443	Nfe2	1.70536	3.49864	2.69888	0.0342005	0.521736	-3.34965
URIAAL_R00182	Egfl7	2.25457	-4.16514	2.69878	0.0342049	0.521736	-4.05725
URIAAL_R08663	Tbc1d10a	0.817287	4.02764	2.69787	0.0342473	0.521736	-3.33363
URIAAL_R04069	Slc30a3	1.35382	0.398408	2.6975	0.0342648	0.521736	-3.62725
URIAAL_R12739	Ctbp2_1	0.827383	2.60982	2.69465	0.0343649	0.521736	-3.39105
NA	NA	-1.45225	5.8726	-2.69526	0.0343695	0.521736	-3.33059
URIAAL_R10378	Tex10	-0.701669	5.69294	-2.69399	0.0344289	0.521736	-3.33193
URIAAL_R00422	Evi2a	-0.906364	1.91178	-2.68897	0.034465	0.521736	-3.44502
URIAAL_R05993	Plek2	1.03092	3.22139	2.69299	0.0344758	0.521736	-3.36276
URIAAL_R08765	Dgcr2	-1.36119	6.36323	-2.69243	0.034502	0.521736	-3.33576
URIAAL_R08506	Aamp	0.974395	4.49999	2.69205	0.0345202	0.521736	-3.33393
URIAAL_R11224	Gsr	-1.33828	2.85167	-2.69172	0.0345358	0.521736	-3.38295
URIAAL_R08507	Map3k2	-0.936186	5.04634	-2.69116	0.0345621	0.521736	-3.33316
NA	NA	2.87998	-4.62337	2.69033	0.0346008	0.521736	-4.06592
URIAAL_R02491	Fam49a_1	-1.24567	1.19388	-2.68993	0.0346198	0.521736	-3.52494
URIAAL_R14259	Ephx1_0	0.947506	0.581301	2.66231	0.034694	0.521736	-3.60046
URIAAL_R04832	S100a4	-1.52409	3.5768	-2.68818	0.0347026	0.521736	-3.35625
URIAAL_R11162	Pccb	0.834383	4.1838	2.6868	0.034768	0.521736	-3.34249
URIAAL_R10886	Slc30a6	-0.617743	6.09115	-2.68658	0.0347785	0.521736	-3.34178
URIAAL_R06603	Dhx15	-0.877867	7.20398	-2.68656	0.0347792	0.521736	-3.34535
URIAAL_R07569	H5	2.34936	11.0655	2.68648	0.0347832	0.521736	-3.34584
URIAAL_R12376	Klhl15	-0.933167	6.4934	-2.68639	0.0347875	0.521736	-3.34334
URIAAL_R02724	Paqr6	1.26216	-0.0504294	2.67451	0.0349652	0.521736	-3.70084
NA	NA	-1.87911	-0.9103	-2.68229	0.0349822	0.521736	-3.83848
URIAAL_R08827	Bcl10	-0.605652	4.5082	-2.67403	0.0349842	0.521736	-3.34679
URIAAL_R15527	Map10	1.06149	3.63395	2.68225	0.0349844	0.521736	-3.35894
URIAAL_R00699	Ube2g2	-0.670572	6.51557	-2.68133	0.0350283	0.521736	-3.34924
URIAAL_R00360	Abr	1.04452	0.304048	2.65522	0.0350386	0.521736	-3.64531
URIAAL_R13098	Ttll4	0.483998	4.55431	2.65382	0.0351073	0.521736	-3.35581
URIAAL_R08640	Wscd2	3.74077	-4.18094	2.67947	0.0351173	0.521736	-4.0536
URIAAL_R14212	Cldn22_1	2.55614	-2.97271	2.67947	0.0351173	0.521736	-4.01004
NA	NA	-0.815435	9.8152	-2.6793	0.0351252	0.521736	-3.35623
URIAAL_R14196	Togaram2	-1.46565	1.47099	-2.67892	0.0351434	0.521736	-3.5049
URIAAL_R01647	Mesd	1.18664	2.29096	2.67891	0.0351441	0.521736	-3.42877
URIAAL_R06519	Grhl1	4.53001	-2.72903	2.67799	0.0351882	0.521736	-3.96061
URIAAL_R13226	Gpr15	-2.27574	-0.263394	-2.67798	0.0351888	0.521736	-3.75705
URIAAL_R13999	Ppp1r2	-1.24486	4.98996	-2.67789	0.0351928	0.521736	-3.3474
URIAAL_R10288	Vps4b	-0.62258	6.89629	-2.67488	0.0353377	0.522307	-3.35778
URIAAL_R02746	Serinc5	0.992102	1.54429	2.6744	0.035361	0.522307	-3.4949
URIAAL_R04678	Cpne3	-0.680536	7.22601	-2.6729	0.0354334	0.522307	-3.36094
URIAAL_R10909	Rasgrp3	-1.95244	0.50116	-2.67264	0.0354458	0.522307	-3.6423
URIAAL_R12377	Apoo	-0.991122	5.55533	-2.67199	0.0354776	0.522307	-3.35542
URIAAL_R06895	Pacs1_0	0.731867	2.64002	2.65362	0.035503	0.522307	-3.4138
URIAAL_R02351	Slu7	-0.695308	8.59384	-2.66972	0.0355876	0.522307	-3.36697
URIAAL_R07412	Kmt5b	-1.1869	8.2064	-2.66874	0.0356352	0.522307	-3.36748
URIAAL_R00125	Abl1	1.21052	0.562452	2.66788	0.0356771	0.522307	-3.62006
URIAAL_R10409	Ttc26	0.833785	2.56864	2.6676	0.0356909	0.522307	-3.41799
URIAAL_R03135	Nudt7	0.907087	2.00598	2.66745	0.0356978	0.522307	-3.45769
URIAAL_R06170	Hk1_1	1.42776	5.30253	2.6674	0.0357003	0.522307	-3.35911
URIAAL_R11178	Gipc3	2.61814	-3.21733	2.66708	0.035716	0.522307	-4.02885
URIAAL_R12449	Akr	-1.81344	-1.68851	-2.66517	0.0358091	0.522307	-3.92975
URIAAL_R00350	Stag2_1	-0.82453	6.78503	-2.66511	0.0358123	0.522307	-3.36837
URIAAL_R10294	Fam173b	-1.04305	5.37174	-2.66466	0.0358341	0.522307	-3.36267
URIAAL_R13467	Ticrr_0	2.24409	0.386128	2.66394	0.0358693	0.522307	-3.67307
URIAAL_R11270	Parp8	1.03094	1.4068	2.66293	0.035919	0.522307	-3.51768
URIAAL_R06570	Adam9_1	1.56324	2.85077	2.66259	0.0359355	0.522307	-3.41111
URIAAL_R11773	Cyp26a1	3.0085	-4.02935	2.66254	0.0359382	0.522307	-4.06138
URIAAL_R13206	Mpp4_1	-2.69384	-3.59005	-2.66174	0.0359775	0.522307	-4.04913
URIAAL_R08189	Mier1	-0.894183	4.97935	-2.6614	0.0359942	0.522307	-3.36519
URIAAL_R13114	Fam126b	-1.22078	6.80393	-2.65839	0.0361424	0.522307	-3.37578
URIAAL_R15598	Tgfb1	1.10027	1.50299	2.65807	0.0361581	0.522307	-3.51234
URIAAL_R12514	Tm9sf2_1	-0.764013	7.65466	-2.65788	0.0361675	0.522307	-3.379
URIAAL_R12873	Rnf165	2.82829	-4.1244	2.65671	0.0362256	0.522307	-4.06616
URIAAL_R00050	Ripor1	1.64314	2.23531	2.65647	0.0362374	0.522307	-3.45612
URIAAL_R08021	Slc8a1	-2.44191	-2.35809	-2.65647	0.0362376	0.522307	-3.97559
URIAAL_R09399	Slc1a4	1.87702	1.56241	2.65616	0.036253	0.522307	-3.52087
URIAAL_R05284	Zfand5	-0.685212	4.75848	-2.65586	0.0362677	0.522307	-3.37104
URIAAL_R01874	Trim33	-0.814508	6.49116	-2.65541	0.03629	0.522307	-3.37823
URIAAL_R09441	Slc30a1	1.64573	5.27614	2.65457	0.0363315	0.522307	-3.37282
URIAAL_R04137	Larp7	-0.739194	5.44123	-2.65331	0.0363941	0.522307	-3.37567
URIAAL_R11949	Plbb	2.05013	1.5867	2.65232	0.0364435	0.522307	-3.52303
URIAAL_R01252	Siae	1.5384	0.42199	2.65157	0.0364812	0.522307	-3.65648
URIAAL_R04871	Pdk3	-0.704063	7.30623	-2.65126	0.0364963	0.522307	-3.3857
URIAAL_R02133	Pfkfb3	1.22481	4.97795	2.65044	0.0365372	0.522307	-3.3769
URIAAL_R14280	Lrp1_1	2.3778	-4.10064	2.65019	0.0365498	0.522307	-4.06918
URIAAL_R03278	Armc9	-1.50199	4.59894	-2.64996	0.0365614	0.522307	-3.37804
URIAAL_R05802	Znf143	-0.811954	4.04057	-2.64977	0.0365709	0.522307	-3.38229
URIAAL_R08362	Aspn	-2.89591	-1.95434	-2.64864	0.0366272	0.522393	-3.9407
URIAAL_R14492	Ptpn23	0.755333	2.52097	2.63435	0.0366439	0.522393	-3.4404
URIAAL_R11916		-0.74543	3.67647	-2.64753	0.0366832	0.522477	-3.39121
URIAAL_R10341	Pak1ip1	-0.506563	8.21752	-2.63835	0.0367439	0.522863	-3.39697
URIAAL_R02779	Ak6	0.764622	1.61166	2.6192	0.0368467	0.52304	-3.51272
NA	NA	-1.17284	2.23225	-2.64405	0.0368581	0.52304	-3.4623
URIAAL_R13919	Dnajc2	-0.630046	5.99378	-2.64369	0.0368764	0.52304	-3.38925
URIAAL_R14365	Plekhm2	1.48324	3.15497	2.64275	0.0369236	0.52304	-3.41511
URIAAL_R09038	Tinagl1	2.02718	3.27499	2.64274	0.0369241	0.52304	-3.41368
URIAAL_R13572	Eefsec	-0.579176	7.02182	-2.63759	0.0371853	0.524503	-3.40042
URIAAL_R12558	Sesn3_1	1.43084	1.80966	2.63746	0.0371921	0.524503	-3.50423
URIAAL_R09426	Tasp1	-0.889811	4.69737	-2.6365	0.0372406	0.524503	-3.39175
URIAAL_R13130	Parp14	1.05666	2.81736	2.63643	0.0372445	0.524503	-3.43355
URIAAL_R06443	Vps35	-0.683823	5.82924	-2.63612	0.0372601	0.524503	-3.39679
URIAAL_R10020	Gpatch8	-0.897749	4.53863	-2.63549	0.0372926	0.524503	-3.39311
URIAAL_R06088	Fam167a_0	1.51258	0.662468	2.63412	0.0373621	0.524503	-3.6329
URIAAL_R06687	Metap2	1.11807	6.93556	2.63385	0.0373761	0.524503	-3.40407
URIAAL_R10982	Nmi	1.19275	3.37649	2.6335	0.0373941	0.524503	-3.41433
URIAAL_R05839	Leap2	-1.66541	2.68834	-2.63293	0.0374232	0.524503	-3.44759
URIAAL_R03224	Gpr171	-1.98732	-0.444679	-2.63244	0.0374483	0.524503	-3.79779
URIAAL_R11706	Slc16a12	-1.493	1.08685	-2.63084	0.0375307	0.524503	-3.58351
URIAAL_R09335	Coq3	-0.627565	4.18086	-2.6239	0.0375915	0.524503	-3.40322
URIAAL_R04138	Ap1ar	0.652175	2.24092	2.60246	0.0377197	0.524503	-3.47777
URIAAL_R07913	Hhip	1.72844	-2.8528	2.61156	0.03772	0.524503	-4.03072
URIAAL_R04685	Dcstamp	-2.79917	-2.06842	-2.62676	0.0377406	0.524503	-3.95842
URIAAL_R07234	Igsf6	-0.932408	2.63724	-2.62657	0.0377508	0.524503	-3.45093
URIAAL_R13660	Fabp4	-3.16726	1.05545	-2.62649	0.0377551	0.524503	-3.6418
URIAAL_R04266	Dennd1b	0.893784	1.93438	2.62376	0.0378241	0.524503	-3.49813
URIAAL_R01138	Tars_0	0.849199	5.27679	2.62505	0.0378292	0.524503	-3.40579
URIAAL_R03169	Rnf182_1	-1.24423	1.30937	-2.62484	0.0378404	0.524503	-3.55872
URIAAL_R05945	Ltbp2	0.698116	4.29264	2.62458	0.0378539	0.524503	-3.40564
URIAAL_R01275	Ilk	1.37918	5.13742	2.62356	0.0379068	0.524503	-3.40628
URIAAL_R04564	Nid1	-2.60658	-2.78174	-2.62301	0.0379354	0.524503	-4.01434
URIAAL_R03328	Eif2a	-0.843886	6.29114	-2.62237	0.0379685	0.524503	-3.41452
URIAAL_R08741	Sfi1	-1.06262	3.03021	-2.62236	0.0379691	0.524503	-3.43679
NA	NA	-1.69218	-2.47643	-2.6084	0.0380252	0.524503	-4.00794
URIAAL_R12399	Gpr174_0	1.4726	4.32006	2.62032	0.0380751	0.524503	-3.41068
URIAAL_R01994	Tbp	-0.687196	5.31846	-2.61998	0.0380929	0.524503	-3.41176
URIAAL_R05636	Fars2	-1.07281	4.37334	-2.61997	0.0380937	0.524503	-3.41023
URIAAL_R06303	Vps9d1	0.93925	4.10596	2.6193	0.0381287	0.524503	-3.4129
URIAAL_R02022	Tnfaip3	0.902542	6.52423	2.61866	0.0381619	0.524503	-3.41975
URIAAL_R03890	Tollip	-0.718557	6.67682	-2.61822	0.038185	0.524503	-3.42106
URIAAL_R05996	Gphn	0.972999	3.70267	2.61781	0.0382063	0.524503	-3.42059
URIAAL_R02839	Osbpl3	-1.30091	-0.785019	-2.59662	0.0382982	0.524503	-3.84236
NA	NA	-0.794012	4.10592	-2.61579	0.0383123	0.524503	-3.41632
URIAAL_R14148	Pdk2	1.05555	1.32831	2.61535	0.0383354	0.524503	-3.56123
URIAAL_R07811	Ankrd40_1	1.61173	-0.328106	2.61467	0.0383712	0.524503	-3.78492
URIAAL_R09650	Alas1	0.807217	4.06218	2.61467	0.0383716	0.524503	-3.41795
URIAAL_R02122	Pdcd4_2	0.837101	1.83354	2.60209	0.0383726	0.524503	-3.51618
URIAAL_R11060	Dcun1d4	-1.90332	7.43429	-2.61241	0.0384903	0.52487	-3.4295
URIAAL_R07140	Trappc5	1.6597	2.37434	2.61118	0.0385556	0.52487	-3.48549
URIAAL_R03878	Gtf2h1	-1.05616	7.02212	-2.61114	0.0385575	0.52487	-3.43025
URIAAL_R09702	Fam83d_0	1.65969	-0.693743	2.61112	0.0385584	0.52487	-3.83823
URIAAL_R05097	Npepl1	1.20116	2.13232	2.61095	0.0385676	0.52487	-3.4973
URIAAL_R03091	Cacna1c_0	1.77322	-1.35197	2.60938	0.0386507	0.525052	-3.92111
URIAAL_R08519	Abcb6	0.945702	8.31942	2.60894	0.0386743	0.525052	-3.4361
URIAAL_R12747	Stk32c	2.1891	-3.42274	2.60572	0.0388455	0.525052	-4.06345
URIAAL_R14563	Esam	2.47067	-0.247158	2.60474	0.0388976	0.525052	-3.79675
URIAAL_R02733	Tpm3	0.668756	6.7129	2.60365	0.0389556	0.525052	-3.43774
URIAAL_R13905	Sp4	-1.18332	3.03644	-2.60359	0.0389589	0.525052	-3.45471
URIAAL_R10002	Ctsl_1	0.71338	6.44436	2.60342	0.0389683	0.525052	-3.43675
URIAAL_R05689	Trnau1apl	-0.453224	8.87879	-2.58228	0.0389871	0.525052	-3.45366
URIAAL_R13463	Zfand6	-0.519538	6.42624	-2.59561	0.0390258	0.525052	-3.44111
URIAAL_R09847	Rims4	3.97579	-2.28512	2.60174	0.0390581	0.525052	-3.96831
URIAAL_R08907	Prelid1	-0.586897	8.63016	-2.6013	0.0390819	0.525052	-3.44539
URIAAL_R07230	Ern1_1	1.26956	1.6605	2.60129	0.0390823	0.525052	-3.54369
URIAAL_R07232	Fam234a_0	-0.679079	4.36437	-2.59986	0.0391588	0.525052	-3.43115
URIAAL_R07969	Mfsd2b	1.57076	5.96984	2.59782	0.0392689	0.525052	-3.43917
URIAAL_R12841	Rlf	-1.19491	9.22056	-2.59625	0.0393538	0.525052	-3.45137
URIAAL_R06139	Grid1_0	-2.44267	-2.86905	-2.59514	0.0394134	0.525052	-4.03286
URIAAL_R09853	Oser1_1	-0.588274	7.69912	-2.59464	0.0394406	0.525052	-3.45139
URIAAL_R00184	Vav2	2.97464	-2.31405	2.59398	0.0394766	0.525052	-3.98536
URIAAL_R13358	Nfkbiz_0	2.86334	-2.60081	2.5935	0.0395024	0.525052	-4.00707
URIAAL_R01226	Sra1	0.980755	4.09668	2.59232	0.0395663	0.525052	-3.44078
URIAAL_R00697	Ing5	-0.660903	6.45371	-2.59225	0.0395702	0.525052	-3.44951
URIAAL_R01032	Foxs1	1.15592	-0.0667011	2.57584	0.0396361	0.525052	-3.75254
URIAAL_R15611	Fam213a_1	-1.48402	5.79522	-2.59094	0.0396419	0.525052	-3.44592
URIAAL_R05914	Fam13b	-0.632393	4.75616	-2.59041	0.0396703	0.525052	-3.4413
NA	NA	-1.38504	-0.626229	-2.58466	0.0397179	0.525052	-3.83452
URIAAL_R02843	Ackr1	4.07327	3.14634	2.58947	0.039722	0.525052	-3.49611
URIAAL_R11260	Pbx3_1	0.980122	6.72147	2.58927	0.0397329	0.525052	-3.45391
URIAAL_R07339	Nup50	-0.61018	7.68868	-2.58891	0.0397521	0.525052	-3.45792
NA	NA	0.678909	5.28086	2.58857	0.0397711	0.525052	-3.44611
URIAAL_R14981	Ppp1r3e	1.84501	-0.0786354	2.58762	0.039823	0.525052	-3.77116
URIAAL_R12165	Fam126a	0.866675	2.39409	2.58729	0.0398411	0.525052	-3.49878
URIAAL_R06357	Ppid	1.09449	2.76435	2.58672	0.0398721	0.525052	-3.48141
URIAAL_R05612	Prcc	1.00658	5.40122	2.58634	0.0398929	0.525052	-3.44898
URIAAL_R10319	Cd83	3.55978	-2.09723	2.58581	0.0399219	0.525052	-3.96743
URIAAL_R08509	Ptpn4	-0.958407	8.23741	-2.5853	0.03995	0.525052	-3.46312
URIAAL_R11395	Donson	-0.704201	2.21301	-2.56109	0.0399726	0.525052	-3.516
URIAAL_R02151	Echdc3	0.67873	5.08896	2.58458	0.0399894	0.525052	-3.44922
URIAAL_R05214	Ank1	1.16488	10.7289	2.58398	0.0400223	0.525052	-3.46405
URIAAL_R14566	Rdh5_1	1.87297	-0.852602	2.58396	0.0400237	0.525052	-3.87581
URIAAL_R09722	Atl2	-0.598545	7.5102	-2.58365	0.0400406	0.525052	-3.46347
URIAAL_R05070	Lrrc34	-0.857855	1.9905	-2.57804	0.040142	0.525052	-3.52976
URIAAL_R09456	Meis1_0	1.44739	1.36399	2.58176	0.0401449	0.525052	-3.58821
URIAAL_R07702	Rfwd3	1.07429	2.25579	2.58139	0.0401654	0.525052	-3.5137
URIAAL_R00464	Stab2_0	4.25729	-1.22602	2.58081	0.0401975	0.525052	-3.90976
NA	NA	-1.00172	2.65314	-2.57959	0.0402647	0.525052	-3.49271
URIAAL_R06401	Rnl2	0.741993	3.97542	2.57931	0.0402806	0.525052	-3.45513
URIAAL_R00592	Rev1	-0.989692	7.53398	-2.57867	0.0403158	0.525052	-3.46909
URIAAL_R01785	Trim8	1.04279	0.886298	2.5743	0.040373	0.525052	-3.63669
URIAAL_R07494	Clic3	0.957553	2.31772	2.57624	0.0404506	0.525052	-3.51332
URIAAL_R11086	Atad1	-0.473611	7.28629	-2.561	0.0404689	0.525052	-3.4789
URIAAL_R14996	Map1b_1	2.23238	-1.64652	2.57501	0.0405193	0.525052	-3.95449
NA	NA	1.15991	0.164601	2.56726	0.0405386	0.525052	-3.73001
URIAAL_R01878	Scube3	3.1324	-3.01126	2.57444	0.0405507	0.525052	-4.03633
URIAAL_R02868	Onecut2_1	3.01971	-4.55213	2.57412	0.040569	0.525052	-4.09731
URIAAL_R02227	Rin3	-0.73929	2.02163	-2.55019	0.0406019	0.525052	-3.53795
URIAAL_R13646	Mybl1	-0.942835	2.31858	-2.57343	0.0406075	0.525052	-3.51553
URIAAL_R14983	Lama5_1	-2.14197	-3.31174	-2.57235	0.0406674	0.525052	-4.06926
URIAAL_R08248	Foxn2_0	1.39772	1.11977	2.57172	0.0407029	0.525052	-3.62014
NA	NA	3.33965	-0.593893	2.57169	0.0407047	0.525052	-3.87346
URIAAL_R05263	Slc16a10	1.19336	7.60459	2.5708	0.0407547	0.525052	-3.47818
URIAAL_R03660	Lrp4	3.35506	-3.59082	2.57005	0.0407966	0.525052	-4.06785
URIAAL_R10065	Snx10	-1.07939	4.70147	-2.56994	0.0408028	0.525052	-3.46296
URIAAL_R03415	Zswim7	-0.575527	4.80142	-2.56499	0.0408445	0.525052	-3.46621
URIAAL_R14856	Sox4	1.74464	0.4174	2.5687	0.0408722	0.525052	-3.71122
URIAAL_R08803	Ipo13	1.07563	3.09034	2.5687	0.0408725	0.525052	-3.48526
URIAAL_R13887	Ankib1	0.624487	6.36428	2.5685	0.0408834	0.525052	-3.47595
URIAAL_R08848	F3	-3.06723	-3.13889	-2.5681	0.0409062	0.525052	-4.04873
URIAAL_R13668	Pip4p2	0.858212	1.80353	2.56029	0.0409469	0.525052	-3.55617
URIAAL_R07095	Aco1	1.49434	4.4353	2.56718	0.0409579	0.525052	-3.46568
URIAAL_R02617	Hnf4a	-3.14459	-2.79863	-2.56702	0.0409672	0.525052	-4.02787
URIAAL_R09757	Isy1	-0.96775	6.63851	-2.56694	0.0409713	0.525052	-3.47896
NA	NA	-0.432786	9.02478	-2.54072	0.0411333	0.525303	-3.50028
NA	NA	3.69988	-1.27875	2.56288	0.0412013	0.525303	-3.92199
URIAAL_R13329	Tmprss7	-2.08178	-2.15681	-2.56242	0.0412272	0.525303	-3.99966
URIAAL_R03903	Ggt7	1.7248	0.536034	2.56241	0.0412278	0.525303	-3.70204
URIAAL_R08398	Panx3	2.07536	-0.142394	2.56154	0.0412771	0.525303	-3.79878
URIAAL_R02379	Slc22a16	2.3527	-4.3648	2.56108	0.0413032	0.525303	-4.10176
URIAAL_R12405	Msn	0.686203	4.68873	2.56059	0.0413311	0.525303	-3.47316
NA	NA	0.671441	7.24364	2.55964	0.0413853	0.525303	-3.49007
URIAAL_R03299	Tnk2	1.3967	3.77561	2.55945	0.0413961	0.525303	-3.4787
URIAAL_R05375	Pgm5	-2.78959	-3.91949	-2.55942	0.0413977	0.525303	-4.09064
URIAAL_R03955	Phf20	-1.07963	7.72776	-2.55931	0.0414041	0.525303	-3.49182
NA	NA	-2.95911	-1.87296	-2.55917	0.0414121	0.525303	-3.96975
URIAAL_R11854	Ssh1	0.870695	2.86172	2.55845	0.0414532	0.525303	-3.50236
URIAAL_R11563	Kctd5	-0.544183	5.8403	-2.5557	0.0416102	0.525303	-3.48709
URIAAL_R04554	Trim67	-2.6599	-3.98547	-2.55213	0.0418156	0.525303	-4.09487
URIAAL_R05038	Abcf3	0.725093	6.48722	2.55187	0.0418307	0.525303	-3.49547
URIAAL_R13064	Sp1	1.17387	5.75446	2.55134	0.0418614	0.525303	-3.49038
URIAAL_R01595	Hdc	-0.962037	4.03929	-2.55089	0.0418872	0.525303	-3.484
URIAAL_R04981	Cd4	-2.01853	0.331531	-2.5505	0.0419094	0.525303	-3.73879
URIAAL_R03742	Esd	0.660352	4.51386	2.55041	0.041915	0.525303	-3.48352
URIAAL_R00235	Dpm2	0.816211	3.03247	2.54906	0.0419927	0.525303	-3.50492
URIAAL_R00268	Mapkap1	-0.575147	6.67767	-2.54886	0.0420044	0.525303	-3.50003
URIAAL_R14649	Slc5a3	0.580532	3.54101	2.5247	0.0420705	0.525303	-3.50084
URIAAL_R09445	Bicral	-1.02929	8.50033	-2.54756	0.0420795	0.525303	-3.50698
URIAAL_R07618	Hebp1_0	2.11104	5.06902	2.54558	0.042195	0.525303	-3.48964
URIAAL_R10060	Rab23	1.33554	-1.58027	2.52183	0.042241	0.525303	-3.97075
URIAAL_R08361	Ecm2	2.65457	-2.71657	2.54428	0.0422705	0.525303	-4.03567
URIAAL_R01379	Fzd5	3.67351	-0.314176	2.54422	0.0422736	0.525303	-3.86803
URIAAL_R08542	Tmem177	1.85511	-0.556535	2.54375	0.0423011	0.525303	-3.85506
URIAAL_R14162	Cep126	2.32364	-4.90471	2.54235	0.0423828	0.525303	-4.11689
URIAAL_R15212	Znf99	2.42232	-0.792485	2.54229	0.0423863	0.525303	-3.89552
URIAAL_R07528	Plcl2_0	2.27043	-0.0773551	2.54079	0.0424745	0.525303	-3.80428
URIAAL_R10959	Nf2_1	-0.964576	3.60185	-2.54018	0.0425098	0.525303	-3.49992
URIAAL_R09249	Ece2	0.611164	3.25931	2.5185	0.0425431	0.525303	-3.5138
URIAAL_R01705	Ide	-1.40823	8.12115	-2.53917	0.0425693	0.525303	-3.51578
URIAAL_R12198	Cenpj_2	-1.3667	-0.836784	-2.53012	0.042597	0.525303	-3.88751
URIAAL_R04535	Pcmt1_0	-0.607782	5.98233	-2.53828	0.0426216	0.525303	-3.50775
URIAAL_R05064	Nceh1	0.94642	1.71391	2.53813	0.0426305	0.525303	-3.58588
URIAAL_R08628	Arpc3	0.977975	5.16797	2.53725	0.0426823	0.525303	-3.50148
URIAAL_R07873	Armc1	-0.573665	7.17348	-2.53683	0.0427067	0.525303	-3.51604
URIAAL_R14579	Ylpm1	-0.9769	6.48181	-2.53648	0.0427274	0.525303	-3.51278
URIAAL_R10532	Btg2	0.736996	7.2354	2.53577	0.0427692	0.525303	-3.5174
URIAAL_R14327	Tuba4a	3.13552	-3.96141	2.53537	0.042793	0.525303	-4.09716
NA	NA	-0.718482	7.08366	-2.53443	0.0428487	0.525303	-3.51836
URIAAL_R00199	St6galnac6	1.21537	0.782929	2.53273	0.0429487	0.525303	-3.68064
URIAAL_R06120	Nt5c1a_0	1.61561	-0.116842	2.5326	0.0429568	0.525303	-3.80014
URIAAL_R14623	Kcne5	2.5921	-2.48624	2.53246	0.0429648	0.525303	-4.02588
URIAAL_R12757	Smpdl3a	-1.87706	-0.181917	-2.53241	0.042968	0.525303	-3.81397
URIAAL_R02363	Fbxw11	-0.599486	5.87751	-2.53235	0.0429713	0.525303	-3.51365
URIAAL_R10118	Znf2	2.41658	-0.0241147	2.53136	0.0430303	0.525303	-3.80919
URIAAL_R09815	Mst1r	1.53856	-0.0912664	2.52911	0.0431643	0.525303	-3.79761
URIAAL_R01321	Snap47	-0.696654	6.10461	-2.52888	0.0431778	0.525303	-3.5192
URIAAL_R09846	Tomm34	0.860467	6.43481	2.5288	0.0431823	0.525303	-3.5213
URIAAL_R01978	Pigm	0.987152	3.03074	2.5258	0.0433617	0.525303	-3.52751
URIAAL_R05527	Gadd45g	1.75519	1.87363	2.52513	0.0434016	0.525303	-3.59272
URIAAL_R10245	Larp4b	-0.630772	3.61818	-2.51666	0.043402	0.525303	-3.51733
URIAAL_R06568	Pwwp2b	0.814677	4.48369	2.52507	0.0434051	0.525303	-3.51044
NA	NA	-1.08207	1.12115	-2.52487	0.0434172	0.525303	-3.64892
URIAAL_R01020	Fktn	0.843692	5.15083	2.52432	0.0434502	0.525303	-3.51577
URIAAL_R12836	Pum1	-1.02932	8.37672	-2.52352	0.0434983	0.525303	-3.53457
NA	NA	-1.22449	0.35773	-2.5235	0.0434998	0.525303	-3.73649
URIAAL_R00893	Tmem79	1.05534	0.241903	2.50755	0.0435649	0.525303	-3.75098
URIAAL_R01681	Gabpb1	-0.946606	6.4847	-2.52209	0.0435845	0.525303	-3.52923
URIAAL_R12463	Cep192_1	-1.36039	1.75688	-2.522	0.04359	0.525303	-3.59945
URIAAL_R06752	Ddit4	-1.6547	5.4549	-2.52151	0.0436189	0.525303	-3.51997
URIAAL_R11657	Nudt1	2.10496	-3.43098	2.52111	0.0436434	0.525303	-4.09067
URIAAL_R00280	Alad	2.49118	3.10829	2.52099	0.0436506	0.525303	-3.53803
URIAAL_R03211	Ncl	0.512903	5.45181	2.5102	0.0437504	0.525303	-3.52888
URIAAL_R01572	Paqr5b	2.57815	-1.03678	2.51856	0.0437974	0.525303	-3.93006
URIAAL_R00218	Ak1	1.55082	0.747001	2.51853	0.043799	0.525303	-3.69936
NA	NA	-2.81275	-3.91538	-2.51848	0.0438022	0.525303	-4.10305
URIAAL_R06200	Chchd1	-0.492392	5.96712	-2.50798	0.0438055	0.525303	-3.53527
NA	NA	-1.39521	0.441551	-2.51786	0.0438395	0.525303	-3.73388
URIAAL_R14208	Ypel5	0.620827	5.74033	2.51777	0.0438452	0.525303	-3.52887
URIAAL_R06723	Manba	-0.789172	7.33823	-2.51692	0.0438964	0.525303	-3.53947
URIAAL_R13835	Slc4a1ap	-0.520443	6.05957	-2.51357	0.0439177	0.525303	-3.53446
URIAAL_R02791	Aldh4a1	1.68476	2.32917	2.51626	0.0439363	0.525303	-3.57079
URIAAL_R14209	Fbxo11	-0.651187	6.9434	-2.51584	0.0439619	0.525303	-3.5391
URIAAL_R07430	Ld	-2.63455	-2.50145	-2.51544	0.0439865	0.525303	-4.03333
URIAAL_R00502	Wdr45b	-0.437012	6.50987	-2.49308	0.0439875	0.525303	-3.54856
URIAAL_R02213	Lrr1	1.46045	1.96609	2.51487	0.044021	0.525303	-3.59175
NA	NA	-0.812785	9.59453	-2.51379	0.0440865	0.525303	-3.54672
URIAAL_R05646		-0.587353	9.44436	-2.51375	0.0440889	0.525303	-3.54687
URIAAL_R07941	Mtus1	-2.24106	-4.20531	-2.51363	0.0440965	0.525303	-4.11312
URIAAL_R12914	Sugct	-2.76338	-3.927	-2.51247	0.0441672	0.525303	-4.10529
URIAAL_R02311	Ctbp1	0.572586	7.90101	2.51226	0.0441802	0.525303	-3.54672
URIAAL_R14935	Icam2	2.33551	-3.37266	2.5111	0.0442508	0.525303	-4.09048
URIAAL_R04305	Prdx1	-0.606573	10.9242	-2.51108	0.0442523	0.525303	-3.54779
URIAAL_R14615	Parp15	0.943646	4.85672	2.51076	0.0442718	0.525303	-3.52797
URIAAL_R11925	Diablo	-0.467523	6.73205	-2.49625	0.0442997	0.525303	-3.55154
URIAAL_R07766	Foxk2	-0.751317	7.24011	-2.50998	0.0443197	0.525303	-3.5471
URIAAL_R09788	Uggt1	-0.569891	6.64235	-2.50933	0.0443594	0.525303	-3.54505
URIAAL_R15023	Rxrba	1.91543	1.69278	2.50795	0.0444436	0.525303	-3.62366
URIAAL_R01440	Scn5a_2	-2.16537	-4.24197	-2.50672	0.0445194	0.525303	-4.11627
URIAAL_R13656	Ube2w	-1.609	6.03082	-2.5067	0.0445208	0.525303	-3.54206
URIAAL_R11816	Mcmbp	0.448889	6.70337	2.48749	0.0445278	0.525303	-3.55822
URIAAL_R04272	Slc30a7	-0.955967	4.7943	-2.50612	0.0445564	0.525303	-3.53254
URIAAL_R04858	Gpr82	-3.33198	-3.47982	-2.50598	0.0445652	0.525303	-4.08424
URIAAL_R04969	C1s	3.42433	5.09695	2.50401	0.0446864	0.525303	-3.53239
URIAAL_R14423	B4galt1	1.74703	4.0769	2.50392	0.044692	0.525303	-3.53301
URIAAL_R10973	Orc4	-0.734776	5.28318	-2.5035	0.044718	0.525303	-3.54035
URIAAL_R10054	Ell2	1.78673	5.91208	2.50342	0.0447231	0.525303	-3.54403
URIAAL_R07280	Ttyh3	-0.748628	2.36554	-2.49393	0.0447538	0.525303	-3.57631
URIAAL_R07083	Or4d2	2.68125	-3.4839	2.50286	0.0447574	0.525303	-4.09417
URIAAL_R14074	Ccr5	-1.42907	0.37728	-2.50281	0.0447607	0.525303	-3.75156
URIAAL_R15366	Suox	1.56851	8.35427	2.50213	0.0448028	0.525303	-3.55892
URIAAL_R05415	Fermt1	-0.989123	1.13254	-2.50145	0.0448451	0.525303	-3.66431
URIAAL_R10484	Baiap2l2	-1.65435	0.467279	-2.50086	0.0448816	0.525303	-3.74602
URIAAL_R05066	Pld1	2.15218	1.51536	2.50037	0.0449117	0.525303	-3.6483
NA	NA	1.78028	-0.0286699	2.49847	0.0450301	0.525303	-3.81195
URIAAL_R13706	Slc29a3	2.08438	-1.71067	2.49827	0.0450427	0.525303	-3.99195
NA	NA	-0.622969	5.255	-2.49821	0.0450466	0.525303	-3.54612
URIAAL_R12213	Katnal1	3.04738	-3.51399	2.49812	0.0450521	0.525303	-4.09336
NA	NA	1.37451	-0.351755	2.49811	0.0450526	0.525303	-3.84524
URIAAL_R10021	Fmnl1_0	1.75504	0.670562	2.49808	0.0450542	0.525303	-3.72721
URIAAL_R14771	Hes6_1	1.44309	2.07663	2.498	0.0450592	0.525303	-3.59844
URIAAL_R13212	Col6a1	2.88276	-1.71171	2.49562	0.0452077	0.525303	-3.98437
NA	NA	-2.41195	-1.22778	-2.49543	0.0452197	0.525303	-3.9564
NA	NA	3.64686	-3.1596	2.49492	0.0452519	0.525303	-4.06404
URIAAL_R09397	Aplf	-0.568549	5.8738	-2.4946	0.0452716	0.525303	-3.55634
NA	NA	0.746499	5.75348	2.49452	0.0452768	0.525303	-3.55504
URIAAL_R07419	Actn1	1.02851	5.17779	2.49442	0.045283	0.525303	-3.54878
URIAAL_R10795	Fam76b	-0.706974	4.87091	-2.49329	0.0453538	0.525303	-3.54751
URIAAL_R09851	Serinc3	0.911019	7.08236	2.49297	0.0453739	0.525303	-3.56585
URIAAL_R05297	Zp3	3.4297	-3.79982	2.49258	0.0453983	0.525303	-4.10153
URIAAL_R14407	Eva1c_2	0.869135	2.54118	2.49229	0.045417	0.525303	-3.57607
URIAAL_R05581	Coq10ba	0.764535	5.82119	2.49184	0.0454447	0.525303	-3.55865
URIAAL_R01532	Fads1_3	-2.3128	0.014966	-2.49169	0.0454545	0.525303	-3.82131
URIAAL_R14627	Cxcr4	-1.85287	3.52464	-2.49091	0.0455037	0.525303	-3.55222
URIAAL_R09678	Arrdc2	0.973446	8.05586	2.49062	0.0455218	0.525303	-3.57198
URIAAL_R14705	Map2k7	0.617881	5.60351	2.49027	0.0455437	0.525303	-3.55854
URIAAL_R04350	Prkacb	-1.25117	4.55474	-2.49021	0.0455478	0.525303	-3.54777
URIAAL_R07915	Jade1_0	-0.664826	6.34163	-2.48983	0.0455713	0.525303	-3.56537
URIAAL_R14460	Mccc2_1	0.699854	4.3972	2.48981	0.0455725	0.525303	-3.54778
URIAAL_R04602	Wtap	-0.773283	6.51904	-2.48981	0.0455725	0.525303	-3.5665
URIAAL_R00029	Znf319	1.05315	2.55705	2.48799	0.0456878	0.525303	-3.58025
URIAAL_R01222	Ccdc30	-1.28481	2.00047	-2.48767	0.0457082	0.525303	-3.61039
URIAAL_R07756	Hrh3_2	-1.14244	1.57224	-2.48732	0.0457301	0.525303	-3.63914
URIAAL_R04406	Gpx1	1.50641	10.0494	2.48728	0.0457324	0.525303	-3.57668
URIAAL_R11853	Naa25	0.754677	5.05655	2.48723	0.0457359	0.525303	-3.55592
URIAAL_R10458	Fam20c_0	1.24206	-0.458975	2.47833	0.0457539	0.525303	-3.86214
URIAAL_R05135	A2m_0	1.51572	2.55535	2.48663	0.0457737	0.525303	-3.58381
URIAAL_R00631	Tmem255a	-1.57477	-2.22536	-2.47526	0.0458144	0.525383	-4.0399
URIAAL_R14818	Lyrm4	-0.888857	3.7055	-2.48311	0.0459975	0.527071	-3.55599
URIAAL_R02726	Glmpa	1.34143	3.42848	2.4816	0.0460934	0.527071	-3.56171
URIAAL_R06914	Apba3	0.753541	5.30349	2.48119	0.0461195	0.527071	-3.56531
URIAAL_R13899	Arl4a	1.08254	7.41472	2.48111	0.0461248	0.527071	-3.58084
NA	NA	2.80238	-3.8929	2.48102	0.0461305	0.527071	-4.11408
URIAAL_R05559	Tcc4	-1.91252	0.791784	-2.47941	0.0462337	0.527378	-3.72918
URIAAL_R02171	Kmt2e	-1.22428	9.46584	-2.47865	0.0462821	0.527378	-3.58736
URIAAL_R07205	Ciita_0	-1.62296	-0.371461	-2.47865	0.0462824	0.527378	-3.86049
URIAAL_R00670	Radx_1	-0.805767	3.82903	-2.47835	0.0463014	0.527378	-3.55989
URIAAL_R05815	Adra2	1.58476	0.773969	2.47793	0.0463283	0.527378	-3.72591
URIAAL_R06156	Samd8	-1.13047	5.62142	-2.47692	0.0463934	0.527378	-3.57283
URIAAL_R06975	Tnfrsf4	-1.07078	3.26891	-2.47618	0.0464407	0.527378	-3.5694
URIAAL_R01673	Iqgap1	0.814815	5.69217	2.4748	0.0465295	0.527378	-3.57659
URIAAL_R14535	Ap2s1	0.83269	4.81655	2.47461	0.0465416	0.527378	-3.56724
URIAAL_R09942	Rfx5	1.17272	2.25862	2.47455	0.0465457	0.527378	-3.60678
URIAAL_R13805	Calm2b	-0.534462	8.17989	-2.47425	0.0465652	0.527378	-3.59145
URIAAL_R12792	Stam2	-0.770377	6.27226	-2.47387	0.0465899	0.527378	-3.583
URIAAL_R00100	Dolk	-0.712692	5.56487	-2.47342	0.0466187	0.527378	-3.57703
URIAAL_R08046	Brox_1	-0.505538	4.67529	-2.4554	0.0466799	0.527378	-3.57632
NA	NA	-0.744515	5.58912	-2.47121	0.0467617	0.527378	-3.57973
URIAAL_R05158	Csrp1	1.81439	3.27717	2.47119	0.0467628	0.527378	-3.57624
URIAAL_R05377	Ptcd2	1.35367	3.23852	2.47026	0.0468233	0.527378	-3.57654
URIAAL_R09642	Rft1	0.846954	2.16393	2.47022	0.0468259	0.527378	-3.61344
URIAAL_R14883	Clasrp	0.991955	6.11674	2.47018	0.0468283	0.527378	-3.58554
URIAAL_R09625	Airc	-1.25652	0.390333	-2.46971	0.0468585	0.527378	-3.76774
URIAAL_R11601	Rbbp6_1	-0.90887	6.43371	-2.46958	0.0468675	0.527378	-3.58895
URIAAL_R00120	Gpr107	-0.720158	6.42636	-2.46766	0.046992	0.528115	-3.5913
URIAAL_R09490	Mrpl57	-0.709417	6.85961	-2.46667	0.0470564	0.528115	-3.59516
URIAAL_R07881		-1.2588	2.74373	-2.46654	0.047065	0.528115	-3.59354
URIAAL_R15583	Ptk2b	1.4333	-0.218528	2.46649	0.0470684	0.528115	-3.84547
URIAAL_R11593	Abcc1_2	-1.25503	4.22729	-2.46571	0.047119	0.528302	-3.57254
URIAAL_R05476	Ccdc88a	-0.730162	2.52124	-2.45666	0.04725	0.52939	-3.60433
URIAAL_R14086	Sacm1l_1	-0.735335	2.32484	-2.45359	0.0473027	0.529563	-3.61394
URIAAL_R01465	Smap	-0.603874	7.19134	-2.46232	0.0473414	0.529563	-3.60193
URIAAL_R09690	Ephb2	2.43519	-4.84787	2.46113	0.0474194	0.529563	-4.13941
URIAAL_R06555	Ppib	0.846069	4.16504	2.46072	0.0474463	0.529563	-3.57777
URIAAL_R08975	Maml1	-0.739728	6.18385	-2.46044	0.0474646	0.529563	-3.59767
URIAAL_R14713	Stat5b	0.886341	6.0737	2.46037	0.0474692	0.529563	-3.5965
URIAAL_R04450	Arl6ip5	0.573255	3.85298	2.44586	0.0475601	0.530198	-3.5849
URIAAL_R06962	Gopc	-0.692018	6.43665	-2.45797	0.0476275	0.530387	-3.60251
URIAAL_R13673	Fsbp	0.904084	0.831389	2.44171	0.0476821	0.530387	-3.72621
URIAAL_R03892	Rbm39	-0.459407	7.48964	-2.44652	0.0476956	0.530387	-3.615
NA	NA	3.37103	-3.28722	2.45668	0.047713	0.530387	-4.08822
URIAAL_R12483	Rnmt	-0.981029	6.29363	-2.45597	0.04776	0.530531	-3.60336
URIAAL_R12740	Uros	1.13016	6.16623	2.45499	0.0478249	0.530603	-3.60305
URIAAL_R11776	Dusp11_0	-1.40442	3.06403	-2.45484	0.0478346	0.530603	-3.59547
URIAAL_R13633	Klf10	1.23968	3.01083	2.4538	0.0479037	0.530992	-3.59741
URIAAL_R06927	Brd9	-0.693198	4.88708	-2.45282	0.0479691	0.531339	-3.5921
URIAAL_R05056	Kng1	-2.96097	-1.29365	-2.45093	0.0480945	0.531726	-3.97591
URIAAL_R07417	Slc8a3	2.49624	-4.04983	2.4508	0.0481034	0.531726	-4.12797
URIAAL_R04835	Krf4	2.83564	-4.1244	2.45076	0.0481063	0.531726	-4.12843
URIAAL_R01012	Slc44a1	1.45866	1.24322	2.44662	0.0483834	0.531737	-3.70073
URIAAL_R14677	Glis2	1.2184	-1.19209	2.42552	0.0483932	0.531737	-3.97233
URIAAL_R06574	Zranb1	-1.46664	9.28834	-2.4453	0.0484719	0.531737	-3.62601
URIAAL_R12146	Sgce	-2.5098	-2.35633	-2.44529	0.0484724	0.531737	-4.05109
URIAAL_R15457	Cep295_4	-1.06375	2.13694	-2.44504	0.0484892	0.531737	-3.63769
URIAAL_R11274	L3mbtl3_1	0.947927	-0.079905	2.42389	0.0485049	0.531737	-3.83592
NA	NA	2.52311	-3.75965	2.44398	0.0485609	0.531737	-4.12349
URIAAL_R10641	Unc50	-0.485942	6.56168	-2.43763	0.0485968	0.531737	-3.62326
URIAAL_R08705	Mapkapk5	-0.474944	5.93013	-2.43228	0.0486117	0.531737	-3.62094
URIAAL_R09683	Ap1m1	-0.428402	5.75293	-2.42073	0.0487221	0.531737	-3.62612
URIAAL_R02570	Vkorc1l1	-0.733152	4.90374	-2.44142	0.0487335	0.531737	-3.60479
NA	NA	3.18307	-3.22918	2.44098	0.0487637	0.531737	-4.09413
URIAAL_R11476	App	3.32908	2.45442	2.44038	0.0488038	0.531737	-3.64929
URIAAL_R03416	Myo18a	2.07407	1.54327	2.43939	0.0488714	0.531737	-3.69154
URIAAL_R03744	Nufip1	-0.63594	2.39437	-2.41832	0.0488886	0.531737	-3.63527
URIAAL_R12819	Uhmk1	0.985205	7.81369	2.43807	0.0489605	0.531737	-3.63223
URIAAL_R00187	Ralgds	0.891549	1.77448	2.43764	0.0489903	0.531737	-3.66365
URIAAL_R01765	Cpeb3	-0.703873	6.78745	-2.43625	0.049085	0.531737	-3.6298
URIAAL_R11039	Mgat5	0.719078	4.61944	2.4362	0.0490879	0.531737	-3.60719
NA	NA	-1.47189	1.75921	-2.43494	0.0491738	0.531737	-3.67085
URIAAL_R11185	Dtx4	0.934849	1.76903	2.43457	0.0491995	0.531737	-3.66663
URIAAL_R09555	Dnajc3	-0.458503	6.68611	-2.42286	0.0492054	0.531737	-3.63753
URIAAL_R03186	Nudt19	1.5891	-0.491265	2.4343	0.0492175	0.531737	-3.89913
URIAAL_R00593	Txndc9	-1.205	8.22017	-2.43372	0.0492571	0.531737	-3.63832
NA	NA	2.8711	-3.55381	2.43342	0.0492781	0.531737	-4.11742
URIAAL_R01837	Gzf1_0	-0.675559	5.26822	-2.43282	0.0493192	0.531737	-3.61916
URIAAL_R07526	Kat2a	1.86784	3.00072	2.43277	0.0493225	0.531737	-3.62033
URIAAL_R13395	Pcsk6	3.3962	-3.80973	2.43273	0.0493253	0.531737	-4.12149
URIAAL_R00393	Supt6h	0.587303	7.34199	2.43137	0.0494182	0.531737	-3.63841
URIAAL_R10151	Abi2	0.807738	3.78559	2.43026	0.0494945	0.531737	-3.60949
URIAAL_R06670	Usp12_2	-0.5844	3.09752	-2.40936	0.0495131	0.531737	-3.62414
URIAAL_R07918	Jade1_1	-0.540885	6.12848	-2.42985	0.049523	0.531737	-3.63238
URIAAL_R12042	Ing3	-0.562978	6.66746	-2.42983	0.0495241	0.531737	-3.63653
URIAAL_R10468	Rac2	1.03109	3.43644	2.42946	0.0495495	0.531737	-3.61283
URIAAL_R11155	Aire	0.578592	3.24176	2.40869	0.0495614	0.531737	-3.62262
URIAAL_R15650	Npas4_2	-2.01541	-0.966045	-2.42899	0.0495822	0.531737	-3.96147
URIAAL_R02520	Kif3b	-0.76562	4.62876	-2.42801	0.0496498	0.531737	-3.61621
URIAAL_R13229	Nme7	-1.31245	3.98217	-2.42776	0.0496666	0.531737	-3.61191
URIAAL_R10108	Preb	0.796153	4.93074	2.4275	0.0496846	0.531737	-3.6203
NA	NA	1.18799	1.3324	2.42708	0.0497134	0.531737	-3.70534
URIAAL_R03627	Pigc	2.15043	0.823367	2.42626	0.0497701	0.531737	-3.76586
NA	NA	2.26338	-4.4108	2.42591	0.0497944	0.531737	-4.14398
URIAAL_R13257	Itsn1	0.47413	4.06511	2.4042	0.0498764	0.531737	-3.6243
URIAAL_R15068	Ervk19_0	-3.45783	-2.37017	-2.42259	0.0500247	0.531737	-4.04862
URIAAL_R02482	Rnaseh1	-0.645833	4.87786	-2.42245	0.0500345	0.531737	-3.62551
URIAAL_R06623	Bod1l1	-0.96176	7.61891	-2.42143	0.0501059	0.531737	-3.65091
URIAAL_R11236	Jak1	-0.558597	6.41614	-2.42108	0.0501296	0.531737	-3.64481
URIAAL_R13582	Acox2	1.04893	4.51525	2.42089	0.0501429	0.531737	-3.62228
URIAAL_R00626	Amot	0.953793	0.78605	2.41275	0.0501711	0.531737	-3.75636
URIAAL_R14719	Nlrc4	-0.638448	2.78609	-2.40386	0.0502336	0.531737	-3.63921
URIAAL_R08949	Aff4	-0.691155	7.65212	-2.41819	0.0503319	0.531737	-3.65496
URIAAL_R03393	Dhrs13	1.49825	1.08452	2.41813	0.0503357	0.531737	-3.73602
URIAAL_R08091	Fam168b	-0.898907	6.33235	-2.41736	0.0503899	0.531737	-3.64806
URIAAL_R07455	Samd15	-1.6497	-0.968942	-2.41729	0.0503947	0.531737	-3.96364
URIAAL_R04302	Eri3	-0.659543	3.29848	-2.41334	0.0504881	0.531737	-3.62849
URIAAL_R10493	Cntn2	-1.29278	0.47762	-2.41585	0.0504956	0.531737	-3.79326
URIAAL_R06247	Helz_1	-0.620519	5.14231	-2.41576	0.0505022	0.531737	-3.63661
URIAAL_R01315	Kansl1l	-0.575136	7.61011	-2.41574	0.0505036	0.531737	-3.65769
URIAAL_R07279	Iqce	-0.695861	5.56046	-2.41565	0.05051	0.531737	-3.6422
URIAAL_R05344	Fam168a	1.32771	2.04435	2.41425	0.0506082	0.531737	-3.67065
URIAAL_R02579	Cog3	-0.732332	5.79048	-2.41324	0.0506791	0.531737	-3.64763
URIAAL_R00605	Nipa2_0	-0.531731	6.19005	-2.41321	0.0506811	0.531737	-3.65198
URIAAL_R00155	Pbx3_0	2.7143	-0.907021	2.41243	0.0507362	0.531737	-3.96867
NA	NA	1.26146	-0.864483	2.40063	0.0507371	0.531737	-3.95035
URIAAL_R14484	Ppp1r36	-1.90918	0.61238	-2.41234	0.0507429	0.531737	-3.79378
URIAAL_R12628	Ccr4_0	-1.33588	-0.547847	-2.4117	0.0507882	0.531737	-3.91422
URIAAL_R01065	Mapk8ip3	0.762756	4.91889	2.41135	0.0508127	0.531737	-3.63806
URIAAL_R06517	Cpsf3	-0.636893	5.44481	-2.41122	0.0508219	0.531737	-3.64582
URIAAL_R13908	Scin_0	-3.48785	-1.04019	-2.4102	0.0508937	0.531737	-3.97739
URIAAL_R08037	Srp9	-0.679272	5.89635	-2.40958	0.0509374	0.531737	-3.65305
URIAAL_R09704	Gss	1.66123	0.62374	2.4095	0.0509437	0.531737	-3.78917
NA	NA	-0.61295	5.02268	-2.4079	0.051057	0.531737	-3.6437
URIAAL_R09008	Ddx46	-0.803924	4.35127	-2.40769	0.0510715	0.531737	-3.63525
URIAAL_R12610	Mlh1	-0.641352	3.8258	-2.40673	0.05114	0.531737	-3.6337
URIAAL_R05946	Rps6kl1	1.60571	0.00274315	2.40672	0.0511409	0.531737	-3.85641
URIAAL_R13849	Fam171a1	-2.55152	-2.35686	-2.40615	0.0511813	0.531737	-4.06584
URIAAL_R07272	Map2k3	1.62209	4.11008	2.40532	0.0512402	0.531737	-3.63544
URIAAL_R08166	Gins4	-0.909274	3.28303	-2.40493	0.0512683	0.531737	-3.63886
URIAAL_R00930	Mllt3	-2.51239	-2.21719	-2.40472	0.051283	0.531737	-4.05746
URIAAL_R08977	Dck_0	-0.988379	7.46121	-2.40467	0.0512869	0.531737	-3.6697
URIAAL_R13156	Dnajb2	0.884693	6.95936	2.40435	0.0513098	0.531737	-3.66752
URIAAL_R01170	Rab18	-0.434796	5.98863	-2.38487	0.0513269	0.531737	-3.67086
URIAAL_R11415	Eurl	-0.653822	4.019	-2.404	0.0513347	0.531737	-3.637
URIAAL_R13062	Hook3_1	-4.11028	-1.46968	-2.40173	0.0514968	0.531737	-4.0019
URIAAL_R09372	Rngtt	-0.866126	4.72719	-2.40147	0.0515154	0.531737	-3.64619
URIAAL_R01117	Znf608	-2.46906	-3.00866	-2.40122	0.0515333	0.531737	-4.10651
URIAAL_R02075	H2afz	-0.431606	6.7317	-2.38423	0.0515454	0.531737	-3.67946
NA	NA	-2.35143	-0.352813	-2.40067	0.0515727	0.531737	-3.91494
URIAAL_R04456	Trnt1	0.849403	5.14594	2.40037	0.0515945	0.531737	-3.65331
URIAAL_R08867	Tmem125	-2.29795	-3.88247	-2.39961	0.051649	0.531737	-4.14107
URIAAL_R10093	Hnrnpl	1.10588	1.09476	2.39908	0.051687	0.531737	-3.74513
URIAAL_R00884	Nkiras2	0.516777	5.2626	2.39556	0.0516951	0.531737	-3.65894
URIAAL_R04744	Mtdh	-1.22585	5.99128	-2.39832	0.0517421	0.531737	-3.6658
URIAAL_R09021	Col8a2	2.0735	-0.648176	2.39824	0.0517474	0.531737	-3.9437
NA	NA	-0.595397	6.34105	-2.39761	0.0517931	0.531737	-3.67116
URIAAL_R01390	Cops8	-0.658744	6.52234	-2.39759	0.0517942	0.531737	-3.67258
URIAAL_R10348	Tpmt	1.68724	0.598995	2.39756	0.0517966	0.531737	-3.8009
URIAAL_R06005	Dtd2	1.0232	2.35028	2.39693	0.0518417	0.531737	-3.67021
URIAAL_R15379	Atp2b3_0	-2.58703	-4.01661	-2.39686	0.0518469	0.531737	-4.14413
URIAAL_R00649	Thoc2	-0.912747	8.43951	-2.39679	0.0518524	0.531737	-3.68203
URIAAL_R04857	Lancl3	2.99476	-3.09058	2.39667	0.0518612	0.531737	-4.10476
URIAAL_R03031		2.07976	-1.9155	2.39644	0.0518777	0.531737	-4.0475
URIAAL_R11888	Pheta1	1.23712	2.59459	2.39615	0.0518982	0.531737	-3.66307
URIAAL_R00878	Mlx	0.548055	6.26971	2.39577	0.0519258	0.531737	-3.67265
URIAAL_R03362	Cab39	-0.52714	6.75102	-2.3957	0.0519312	0.531737	-3.67652
URIAAL_R04110	Tmub1	0.999681	3.0324	2.39522	0.0519656	0.531737	-3.65247
NA	NA	2.06845	-1.30797	2.39418	0.052041	0.531737	-4.00764
URIAAL_R12044	Lsm8	-0.516509	5.26245	-2.39069	0.0520617	0.531737	-3.6646
URIAAL_R11958	Pisd	0.693801	5.93808	2.39386	0.0520642	0.531737	-3.67136
URIAAL_R14234	Btbd9	-1.12456	6.51213	-2.39367	0.0520781	0.531737	-3.67644
URIAAL_R08679	Rnf215	0.519501	4.69139	2.38541	0.0520807	0.531737	-3.65878
NA	NA	1.47271	-1.63198	2.38644	0.0521338	0.531737	-4.03657
URIAAL_R11199	Hnrnpk	-0.739858	4.63953	-2.39263	0.0521532	0.531737	-3.65491
URIAAL_R00923	Gnai2	1.29028	2.43457	2.39129	0.0522504	0.531737	-3.67337
URIAAL_R05170	Rnd1	-1.07635	5.18675	-2.3909	0.0522793	0.531737	-3.66393
URIAAL_R00414	Usp32	-0.939881	8.21188	-2.39044	0.0523127	0.531737	-3.68891
URIAAL_R09848	Ada	1.59486	4.04796	2.39039	0.0523162	0.531737	-3.6509
URIAAL_R01671	Mfap1	0.916071	3.94628	2.38916	0.0524061	0.531737	-3.65215
NA	NA	-1.35621	1.44552	-2.3891	0.0524101	0.531737	-3.72809
URIAAL_R02047	Enpp3	1.27571	-0.0733675	2.3875	0.0525268	0.531737	-3.87133
URIAAL_R14383	Tmem259	0.587934	5.44429	2.38714	0.0525537	0.531737	-3.673
URIAAL_R00945	Ermp1	0.936552	0.92957	2.38142	0.0525687	0.531737	-3.76707
URIAAL_R01439	Ccdc13	1.43948	-1.34303	2.38209	0.0525856	0.531737	-4.01544
URIAAL_R14160	Panx1	-1.7173	-2.415	-2.38613	0.0526277	0.531737	-4.08776
URIAAL_R00011	Trim39_1	1.41357	4.34663	2.38483	0.0527224	0.531737	-3.65879
URIAAL_R11975	Ddx55	-0.669837	4.04084	-2.38285	0.0528681	0.531737	-3.65934
URIAAL_R00740	Spata2	-0.717114	3.3458	-2.38151	0.0529674	0.531737	-3.66129
URIAAL_R06477	Ccne1	1.80265	-1.22125	2.38121	0.0529892	0.531737	-4.00723
URIAAL_R10400	Trim7_1	-2.72368	-3.35102	-2.38099	0.0530055	0.531737	-4.1277
NA	NA	1.06663	3.26363	2.38034	0.0530533	0.531737	-3.66363
URIAAL_R07469	Srp54	-0.736761	6.48904	-2.38019	0.0530644	0.531737	-3.69232
URIAAL_R14467	Ca9	1.85265	0.921796	2.37996	0.0530819	0.531737	-3.78578
URIAAL_R04067	Rnf19b_1	0.952225	3.08822	2.37971	0.0530999	0.531737	-3.66646
URIAAL_R03389	Pigs	0.986168	5.26847	2.37918	0.0531394	0.531737	-3.67839
URIAAL_R00381	Tmem97	1.15172	3.08216	2.37806	0.0532222	0.531737	-3.66851
URIAAL_R13821	Rcor3	0.833022	2.13031	2.37749	0.0532642	0.531737	-3.69577
URIAAL_R10729	Cdkn1a_0	1.56788	5.12816	2.37716	0.0532893	0.531737	-3.67656
URIAAL_R13278	Tnfrsf1a	0.720477	2.61786	2.37495	0.0532993	0.531737	-3.67939
URIAAL_R10580	Fam210a	-0.909811	4.54466	-2.37701	0.0533003	0.531737	-3.67037
URIAAL_R14268	Mnat1	-0.910522	8.06466	-2.3767	0.0533232	0.531737	-3.70455
URIAAL_R07810	Ankrd40_0	0.9183	1.80896	2.37655	0.0533344	0.531737	-3.71258
URIAAL_R10497	Dyrk3	1.44322	8.32188	2.37594	0.0533799	0.531737	-3.70572
URIAAL_R09386	Tmem30a	-0.701332	5.77934	-2.37584	0.0533874	0.531737	-3.69015
URIAAL_R13021	Rpl37	-1.56286	5.48047	-2.37577	0.0533923	0.531737	-3.68332
URIAAL_R00795	Susd3	0.982033	6.2564	2.37562	0.0534032	0.531737	-3.69506
URIAAL_R14843	Ier3ip1	-0.925852	3.83194	-2.37555	0.0534084	0.531737	-3.66596
URIAAL_R11647	Prpsap2	0.89564	2.38544	2.37469	0.0534727	0.531737	-3.68855
URIAAL_R06629	Chmp1b	0.615913	5.6856	2.37426	0.0535047	0.531737	-3.69081
URIAAL_R14834	Sell	1.64515	0.831553	2.3741	0.0535168	0.531737	-3.79403
URIAAL_R13503	Ctdspl2_1	-1.54722	5.01026	-2.37401	0.0535234	0.531737	-3.67838
URIAAL_R13036	Cckar_1	3.0911	-3.21049	2.37379	0.0535395	0.531737	-4.1179
URIAAL_R04342	Mysm1	-0.860346	5.35924	-2.37303	0.0535965	0.531737	-3.68716
URIAAL_R03872	Cars	-0.526548	7.44845	-2.37299	0.0535994	0.531737	-3.70676
URIAAL_R13075	Mtnd6	2.17985	2.13167	2.37271	0.0536207	0.531737	-3.70946
URIAAL_R13937	Phyh	1.22773	0.699638	2.37268	0.0536227	0.531737	-3.7996
URIAAL_R05286	Tmem2_0	0.715255	1.96528	2.35825	0.0536238	0.531737	-3.71091
URIAAL_R07943	Cnot7	-0.830617	7.26	-2.37224	0.0536554	0.531737	-3.70654
URIAAL_R02303	Nop14	-0.448153	6.80503	-2.36208	0.0536619	0.531737	-3.7098
URIAAL_R11589	45181	1.495	1.61422	2.37075	0.053767	0.531737	-3.73265
URIAAL_R08699	Wdr66	-3.74968	0.608457	-2.37028	0.0538024	0.531737	-3.87159
URIAAL_R03990	Ankef1	1.40438	0.898115	2.36927	0.0538784	0.531737	-3.78708
URIAAL_R01577	Sema4b	1.84408	1.56571	2.36849	0.0539365	0.531737	-3.74284
URIAAL_R07423	Lgalsla	2.21914	6.28349	2.36757	0.0540058	0.531737	-3.70072
URIAAL_R12967	Galr2_2	2.39595	-3.16182	2.36756	0.054007	0.531737	-4.12719
URIAAL_R08824	Klf4_0	1.55905	8.06809	2.36749	0.0540117	0.531737	-3.71475
URIAAL_R08239	Rufy3	0.688318	2.01785	2.34923	0.0540279	0.531737	-3.71411
URIAAL_R11027	Esg1	3.39409	-1.43752	2.36677	0.0540664	0.531737	-4.01855
URIAAL_R06029	Cep128_2	-1.84368	0.523261	-2.36628	0.0541033	0.531737	-3.83256
URIAAL_R05264	Rpf2	-0.615915	4.96825	-2.36626	0.0541043	0.531737	-3.68913
URIAAL_R03140	Mthfsd	1.34737	-0.172921	2.36598	0.054126	0.531737	-3.89665
URIAAL_R05787	Ampd3	-1.21661	6.22363	-2.36481	0.0542141	0.531737	-3.70675
URIAAL_R00632	Nkrf	-0.808004	8.65827	-2.36452	0.0542364	0.531737	-3.7202
URIAAL_R11472	Hspa13	-0.834751	4.10048	-2.36448	0.054239	0.531737	-3.67906
URIAAL_R10639	Eif5b	-1.29694	7.54196	-2.36431	0.0542521	0.531737	-3.71674
URIAAL_R01928	Chia	-2.60003	-2.81453	-2.36248	0.0543902	0.531737	-4.10857
URIAAL_R05597	Yrk_0	1.0834	-0.188054	2.35042	0.05442	0.531737	-3.89788
URIAAL_R09859	Uevld	-1.02401	3.71139	-2.36171	0.054449	0.531737	-3.68005
URIAAL_R15119	Ccl4_2	2.43941	2.2407	2.36136	0.0544755	0.531737	-3.71647
URIAAL_R06584	Aldh18a1	0.846597	3.722	2.36061	0.0545323	0.531737	-3.68121
NA	NA	-1.88533	3.89606	-2.36015	0.0545676	0.531737	-3.68172
URIAAL_R08784	Dnttip2	-1.3544	7.48899	-2.35955	0.0546133	0.531737	-3.72197
URIAAL_R07818	Narf_0	1.1511	7.26234	2.35811	0.0547227	0.531737	-3.72263
URIAAL_R08923	Camlg	-0.505465	3.92178	-2.33788	0.0547998	0.531737	-3.69435
URIAAL_R03638	Cop1	-0.568029	5.58959	-2.35684	0.0548197	0.531737	-3.70949
URIAAL_R07624	Polr2f	-0.660466	6.24398	-2.35678	0.0548249	0.531737	-3.7172
NA	NA	-0.40712	8.21601	-2.33821	0.0548651	0.531737	-3.73952
URIAAL_R06306	Cmtm3	1.06659	-0.632934	2.33699	0.0548692	0.531737	-3.95106
URIAAL_R10824	Pcsk7	0.94189	4.12256	2.35616	0.054872	0.531737	-3.68796
URIAAL_R02739	Kif2a	1.28178	1.76034	2.35589	0.0548925	0.531737	-3.73504
URIAAL_R11783	R3hcc1l	2.38555	-1.21235	2.35589	0.0548928	0.531737	-4.01669
URIAAL_R14885	Sympk	0.842328	3.99108	2.3557	0.0549074	0.531737	-3.68747
URIAAL_R10927	Gnpda2	-0.580471	3.86511	-2.35033	0.0549091	0.531737	-3.68922
URIAAL_R13301	Ttf2	-0.707224	5.97182	-2.35454	0.0549965	0.531737	-3.71681
URIAAL_R08931	N4bp3	1.84625	-0.500381	2.35437	0.055009	0.531737	-3.94706
URIAAL_R01149	Slc25a42	-1.04806	5.4293	-2.35415	0.055026	0.531737	-3.70896
URIAAL_R14748	Col6a6	2.84913	-1.79607	2.35405	0.0550334	0.531737	-4.04852
URIAAL_R08076	Slc45a1	1.00059	1.57686	2.35304	0.0551115	0.531737	-3.74541
URIAAL_R02527	Scrt2	1.70642	-1.24204	2.35277	0.0551322	0.531737	-4.02175
URIAAL_R10841	Sik3_2	-0.653454	4.43174	-2.35198	0.0551931	0.531737	-3.69641
URIAAL_R10586	Lpin2	-1.10702	10.7449	-2.3515	0.0552298	0.531737	-3.73358
URIAAL_R08173	Angptl3	-1.73261	-1.35312	-2.35114	0.0552573	0.531737	-4.03235
URIAAL_R08793	Syde2	-2.57257	-3.49732	-2.35095	0.0552725	0.531737	-4.14541
URIAAL_R03195	Dync1li2	-0.767436	5.89747	-2.34996	0.0553484	0.531737	-3.72103
URIAAL_R14216	Cd3e	-1.87279	1.5465	-2.34898	0.0554246	0.531737	-3.75835
URIAAL_R14165	Ck054	1.76514	0.972415	2.34891	0.0554301	0.531737	-3.80207
URIAAL_R04511	Arid1b	0.64412	3.60331	2.34772	0.0555217	0.531737	-3.69435
URIAAL_R00252	Gbgt1	-1.38379	0.348931	-2.3477	0.0555238	0.531737	-3.8528
URIAAL_R05472	Pnpt1	-0.484391	7.09177	-2.34764	0.0555279	0.531737	-3.73442
URIAAL_R12488	Rock1_1	-1.08792	4.19821	-2.34706	0.0555729	0.531737	-3.69819
URIAAL_R12917	Ube2d2_1	-1.3106	6.09568	-2.3469	0.0555856	0.531737	-3.72559
URIAAL_R09620	Acsl1	0.760266	1.86189	2.33823	0.0556551	0.531737	-3.73691
URIAAL_R03559	Ythdf3	-0.554758	6.67436	-2.34542	0.0557004	0.531737	-3.73414
URIAAL_R03587	Mtfr1	-0.453128	6.61139	-2.33723	0.0557331	0.531737	-3.73861
URIAAL_R03474	Lasp1	1.22506	0.783093	2.34458	0.055766	0.531737	-3.81237
URIAAL_R07350	Cdkn1b	0.481791	6.48153	2.34306	0.055785	0.531737	-3.73457
URIAAL_R12831	Epc1	-0.75421	6.11729	-2.34341	0.0558567	0.531737	-3.73113
URIAAL_R14554	Hnrnpc	0.952122	3.93046	2.34289	0.0558971	0.531737	-3.70041
URIAAL_R13753	Ndst2	-0.781985	1.31526	-2.32678	0.0559795	0.531737	-3.77256
URIAAL_R03687	Gstcd	-1.50099	3.31771	-2.3418	0.0559827	0.531737	-3.70171
URIAAL_R10759	Znf292	-1.28404	5.99992	-2.34059	0.056077	0.531737	-3.7317
URIAAL_R09648	Pbrm1	-0.643863	7.17584	-2.34052	0.0560826	0.531737	-3.74311
URIAAL_R04984	Gapdh	0.552333	5.77469	2.34025	0.0561041	0.531737	-3.73088
URIAAL_R05910	Slc22a4	2.39072	1.33867	2.34003	0.0561209	0.531737	-3.78883
URIAAL_R06976	C1qtnf12	-0.927603	2.95188	-2.33911	0.0561935	0.531737	-3.70779
URIAAL_R12125	Mllt10	-0.54788	8.00185	-2.33872	0.056224	0.531737	-3.74891
URIAAL_R13851	Crot	0.548576	5.19371	2.33826	0.0562595	0.531737	-3.72424
URIAAL_R02148	Rbm17	-0.538305	6.03342	-2.33798	0.056282	0.531737	-3.73676
URIAAL_R03739	Lpar6_0	-0.656468	2.16918	-2.31909	0.0563128	0.531737	-3.73433
URIAAL_R15374	Prss8	-2.91334	-3.27432	-2.33687	0.0563693	0.531737	-4.13734
URIAAL_R05665	Gmnn	-1.08257	2.4009	-2.33636	0.0564091	0.531737	-3.72325
URIAAL_R03165	Bco1	1.35734	0.394616	2.33609	0.0564308	0.531737	-3.85598
URIAAL_R12256	Dusp16	2.71757	-1.56469	2.33607	0.0564321	0.531737	-4.04399
URIAAL_R09032	Hpca	-2.60534	-3.22635	-2.33501	0.0565157	0.531737	-4.13995
NA	NA	-2.14791	-1.45702	-2.33462	0.0565467	0.531737	-4.04414
URIAAL_R04070	Fkbp4	1.24522	5.43911	2.33339	0.0566434	0.531737	-3.7317
URIAAL_R04256	Coa7	0.680673	4.6535	2.33297	0.0566773	0.531737	-3.72051
NA	NA	-0.757098	2.02605	-2.32746	0.0567222	0.531737	-3.74055
URIAAL_R08625	Rilpl1	-1.74297	0.668795	-2.33223	0.0567355	0.531737	-3.83824
URIAAL_R00860	Cntnap1	2.43712	-0.938887	2.33222	0.0567363	0.531737	-4.00823
URIAAL_R06382	Dock2_1	0.92143	0.577502	2.3206	0.0567401	0.531737	-3.83774
URIAAL_R10559	Prickle1_1	3.33503	-2.89937	2.33212	0.0567443	0.531737	-4.1128
URIAAL_R08328	Tmem135	0.912167	4.29159	2.33136	0.0568041	0.531737	-3.71636
NA	NA	-2.93585	-1.73505	-2.33127	0.0568117	0.531737	-4.0551
URIAAL_R06439	Itfg1	-0.8509	6.21736	-2.33084	0.0568458	0.531737	-3.74651
URIAAL_R01328	Dnajb6	-0.902084	9.06298	-2.32957	0.0569469	0.531737	-3.76156
NA	NA	-0.542052	7.08185	-2.32937	0.0569623	0.531737	-3.75559
URIAAL_R01476	Acta2_1	-1.08472	1.9316	-2.32935	0.0569644	0.531737	-3.74722
URIAAL_R02992	Gadd45b	-1.817	5.60023	-2.32894	0.0569966	0.531737	-3.73684
URIAAL_R14408	Faah2	-1.03719	3.56506	-2.32862	0.0570227	0.531737	-3.71383
URIAAL_R12616	Fbxl2	-1.60427	-0.358345	-2.32733	0.0571249	0.531737	-3.942
URIAAL_R13231	Filip1l	-2.71258	-1.43104	-2.32702	0.0571498	0.531737	-4.04068
URIAAL_R11728	Rgs10	-1.13069	1.93018	-2.32687	0.057162	0.531737	-3.74976
URIAAL_R04152	Slc22a6a_0	-2.90574	0.434706	-2.32669	0.0571759	0.531737	-3.88817
URIAAL_R10440	Usp106_0	-0.520415	7.42313	-2.32609	0.057224	0.531737	-3.76131
URIAAL_R07910	Lsm6	3.0185	-0.972	2.32597	0.0572337	0.531737	-4.014
URIAAL_R13121	Clk1	-0.582669	8.34724	-2.3253	0.0572871	0.531737	-3.76558
URIAAL_R00240	Ciz1	0.932324	0.902675	2.32181	0.0573224	0.531737	-3.81406
URIAAL_R05690	Nup153	-0.82036	7.71077	-2.3245	0.0573514	0.531737	-3.76432
URIAAL_R10852	Adamts15	2.63453	-4.74619	2.32448	0.0573532	0.531737	-4.17889
URIAAL_R05584	Fam160b2	1.11623	2.84796	2.32439	0.0573602	0.531737	-3.72393
URIAAL_R06379	Ttc31	1.10672	5.43836	2.324	0.0573912	0.531737	-3.74284
URIAAL_R05458	Ccdc126	-0.974633	3.51072	-2.3238	0.0574078	0.531737	-3.71873
URIAAL_R10029	Myo7a	-2.74122	-3.79437	-2.32277	0.0574902	0.531737	-4.16272
URIAAL_R06780	Med26	-0.436607	6.13311	-2.30981	0.0574979	0.531737	-3.7629
NA	NA	-1.09177	0.390083	-2.32173	0.0575738	0.531737	-3.86204
URIAAL_R02496	Wdr35	-0.824584	6.12584	-2.32098	0.0576339	0.531737	-3.75691
NA	NA	-0.635476	6.57968	-2.32003	0.0577106	0.531737	-3.76272
URIAAL_R03852	Arntl2_1	1.12048	2.38125	2.32001	0.0577125	0.531737	-3.73893
URIAAL_R04209	Gpsm2	0.451459	5.93186	2.30996	0.0577519	0.531737	-3.76218
URIAAL_R00677	Farp2	-1.58088	1.01011	-2.31889	0.0578025	0.531737	-3.81622
URIAAL_R01769	Entpd1	1.42424	3.88557	2.31885	0.0578056	0.531737	-3.72481
URIAAL_R06087	Hdac1	1.18934	1.14705	2.31794	0.0578794	0.531737	-3.80263
NA	NA	-0.46823	5.6971	-2.31066	0.0579359	0.531737	-3.75997
URIAAL_R11609	Spsb3	0.579731	5.59874	2.31701	0.057955	0.531737	-3.75486
URIAAL_R03157	Hnf4b	2.68608	-3.47757	2.31688	0.0579653	0.531737	-4.1552
URIAAL_R03518	Cdh22	2.75875	-3.90652	2.31676	0.057975	0.531737	-4.16716
URIAAL_R11307	Ythdf2	-0.623512	5.76162	-2.31656	0.0579916	0.531737	-3.75776
URIAAL_R11896		2.96332	-3.80973	2.31645	0.0580001	0.531737	-4.16423
URIAAL_R11087	Sgms1	-0.835947	7.1534	-2.31635	0.0580083	0.531737	-3.77097
URIAAL_R00686	Sumo3	-0.616522	7.83393	-2.31572	0.0580592	0.531737	-3.77519
URIAAL_R11537	Natd1	1.08093	1.61045	2.31554	0.0580737	0.531737	-3.77492
URIAAL_R03467	Phospho1	1.35476	5.16659	2.31538	0.0580867	0.531737	-3.74685
URIAAL_R03694	Gar1	1.07973	-0.11428	2.30712	0.0581488	0.531737	-3.91796
URIAAL_R11543	Mief2	0.794281	3.87761	2.31262	0.0583114	0.531737	-3.73182
URIAAL_R05250	Mfsd4b	0.557294	4.51983	2.31079	0.0584607	0.531737	-3.74268
URIAAL_R10437	Emp1	-2.82801	-3.44724	-2.31037	0.0584949	0.531737	-4.15515
URIAAL_R09956	Cox18	-1.9977	1.9432	-2.31016	0.0585125	0.531737	-3.76953
URIAAL_R09127	Atp6ap1	0.756086	3.92094	2.30966	0.0585532	0.531737	-3.73534
URIAAL_R01798	Shoc2	-0.547978	5.23165	-2.30964	0.0585548	0.531737	-3.75722
URIAAL_R12205	Zdhhc20	-0.984823	5.00717	-2.30939	0.0585751	0.531737	-3.75214
NA	NA	-1.02623	6.34117	-2.30933	0.0585803	0.531737	-3.77231
URIAAL_R11654	Foxk1	0.926643	3.31182	2.30882	0.0586223	0.531737	-3.73419
URIAAL_R04854	Mospd2	-0.740071	5.21684	-2.30879	0.0586244	0.531737	-3.75747
URIAAL_R05468	Slc11a2	1.16544	2.50437	2.30769	0.0587148	0.531737	-3.74702
URIAAL_R08853	Znf644	-1.06028	8.30491	-2.30715	0.0587595	0.531737	-3.7865
URIAAL_R14715	Git1	3.45745	-3.52122	2.30657	0.0588068	0.531737	-4.15
URIAAL_R00072	Ntng2	2.66596	-4.73016	2.30429	0.0589945	0.531737	-4.18489
URIAAL_R12901	Bbs9	-0.994797	5.49232	-2.30408	0.059012	0.531737	-3.76678
URIAAL_R01748	Fbxl15	0.637288	3.69287	2.30365	0.0590476	0.531737	-3.73993
URIAAL_R07345	Rad51ap1	0.926696	4.13033	2.30346	0.0590628	0.531737	-3.74406
URIAAL_R01550	Spata5l1	-0.736787	5.13419	-2.30344	0.0590651	0.531737	-3.76199
URIAAL_R02116	M1ap	-1.31299	-0.731766	-2.30317	0.0590873	0.531737	-3.98999
URIAAL_R15135	Il6r	1.032	1.58987	2.30257	0.0591363	0.531737	-3.78606
URIAAL_R08148	Knl1_1	-1.45981	2.58836	-2.30227	0.0591618	0.531737	-3.75065
URIAAL_R01843	Chac2	1.25633	2.33886	2.30142	0.0592322	0.531737	-3.75757
URIAAL_R08085	Ryk	0.730562	3.2768	2.30085	0.0592793	0.531737	-3.74221
URIAAL_R02234	Vrk1	-0.667107	2.78759	-2.29629	0.0593245	0.531737	-3.74865
URIAAL_R04183	Tbc1d25	1.38345	2.31487	2.29944	0.0593961	0.531737	-3.76074
URIAAL_R08198	Apobec1_0	1.59723	-0.0624933	2.2994	0.0593996	0.531737	-3.92861
URIAAL_R01165	Bambi	1.24977	1.54764	2.2994	0.0593997	0.531737	-3.79272
URIAAL_R02562	Styxl1	-1.33925	-0.288277	-2.29823	0.0594971	0.531737	-3.94672
URIAAL_R02138	Dld	-0.400032	6.02102	-2.28005	0.059501	0.531737	-3.79304
URIAAL_R06920	Pram1	0.758075	0.920198	2.27991	0.0595126	0.531737	-3.83411
URIAAL_R04238	Eif2b3	-0.656933	6.39	-2.2979	0.0595245	0.531737	-3.7866
URIAAL_R05091	Adrm1	-0.421305	6.86056	-2.28505	0.0595349	0.531737	-3.79846
URIAAL_R00415	Lpar1_0	-2.57298	-3.44316	-2.29743	0.0595637	0.531737	-4.16179
URIAAL_R14248	Kcnk5	1.94285	3.00124	2.29686	0.0596111	0.531737	-3.74968
URIAAL_R12443	Gpr83_2	-1.73078	-0.666054	-2.29627	0.0596602	0.531737	-3.99268
URIAAL_R10551	Tspo_0	2.23786	7.37531	2.29558	0.0597176	0.531737	-3.79424
URIAAL_R00377	Omg	-0.827928	0.882093	-2.28082	0.0597419	0.531737	-3.83838
URIAAL_R03945	Top2b	-0.493035	7.33558	-2.29464	0.0597961	0.531737	-3.79758
NA	NA	0.934524	0.739439	2.28974	0.059821	0.531737	-3.84937
URIAAL_R15321	Ccl4_3	1.3842	-1.92308	2.28228	0.0598502	0.531737	-4.09781
URIAAL_R01710	Got1	0.702931	2.63255	2.29357	0.0598716	0.531737	-3.75616
URIAAL_R11634	Arl6ip1	-0.480521	6.11253	-2.29305	0.0598968	0.531737	-3.78923
URIAAL_R05762	Ccdc73	-1.26164	1.10858	-2.29308	0.0599267	0.531737	-3.82516
URIAAL_R04951	Lypd2_0	-2.64143	-3.52582	-2.29251	0.059975	0.531737	-4.16552
URIAAL_R09138	Dock4	-1.02136	-0.64936	-2.2736	0.0600506	0.531737	-3.98637
URIAAL_R07246	Crebbp	-0.743268	8.48448	-2.29107	0.0600955	0.531737	-3.80598
URIAAL_R07368	Emc7	-0.688152	5.8705	-2.29095	0.0601055	0.531737	-3.78845
URIAAL_R10541	Rap1a	-0.680797	7.8769	-2.29049	0.0601442	0.531737	-3.80486
URIAAL_R11404	C2cd2	0.529137	7.76427	2.29036	0.0601556	0.531737	-3.80462
URIAAL_R13267	Dyrk1a	-0.734345	6.55474	-2.2896	0.0602191	0.531737	-3.79767
URIAAL_R05026	Tgds	-0.790529	5.42454	-2.28781	0.0603704	0.531737	-3.78478
URIAAL_R06097	Ppt1	0.386371	5.12477	2.2693	0.0604199	0.531737	-3.79064
URIAAL_R13690	Nudcd1	-0.777042	5.35457	-2.28695	0.0604429	0.531737	-3.78451
URIAAL_R12915	Cdk13	-0.760021	8.70019	-2.28662	0.060471	0.531737	-3.81161
URIAAL_R09583	Prelid3b	-0.446364	6.00142	-2.27814	0.0604798	0.531737	-3.80053
URIAAL_R00667	Atp7a_0	-1.0313	6.16669	-2.28575	0.0605447	0.531737	-3.79753
URIAAL_R06904	Klhdc3	0.776903	5.0308	2.2854	0.0605747	0.531737	-3.78002
URIAAL_R11042	R3hdm1	-0.540253	5.51721	-2.28534	0.0605795	0.531737	-3.78977
URIAAL_R08583	Coq10b	-1.37876	3.63684	-2.28531	0.0605823	0.531737	-3.75816
URIAAL_R14882	Relb	1.22348	4.95977	2.28484	0.0606222	0.531737	-3.77763
URIAAL_R10094	B4galt3_2	1.23293	2.61074	2.28477	0.0606278	0.531737	-3.76604
URIAAL_R03611	Odr4	-0.641204	5.47524	-2.28462	0.060641	0.531737	-3.78969
URIAAL_R08503	Glb1_0	0.69566	2.34442	2.27814	0.0606838	0.531737	-3.77351
URIAAL_R11884	Rnft2	0.65236	3.432	2.28368	0.0607204	0.531737	-3.75938
URIAAL_R09761	Iars	-0.706415	6.66763	-2.28348	0.0607376	0.531737	-3.80582
URIAAL_R05315	Ttc12	-2.0226	3.74389	-2.28306	0.0607732	0.531737	-3.7604
URIAAL_R05100	Znf512b_0	1.15898	1.67576	2.28293	0.060784	0.531737	-3.79871
URIAAL_R10008	Arid4a	-0.734262	7.12467	-2.28249	0.0608218	0.531737	-3.81035
NA	NA	1.27387	0.450798	2.28241	0.0608283	0.531737	-3.8843
URIAAL_R04343	Stil_0	-1.42045	-0.21627	-2.28188	0.0608733	0.531737	-3.95083
URIAAL_R12851	Tmem246	2.56551	-2.33741	2.28185	0.060876	0.531737	-4.11283
URIAAL_R05143	Ipo9	-0.793331	4.93651	-2.28178	0.060882	0.531737	-3.78221
URIAAL_R06503	Gsta3_0	-1.07924	-0.871395	-2.26278	0.0609837	0.531737	-4.01528
URIAAL_R10339	Tbc1d7	0.534471	3.91782	2.27033	0.06108	0.531737	-3.77161
URIAAL_R02980	Zc3h10	1.02701	3.82693	2.27921	0.0611012	0.531737	-3.76606
URIAAL_R04215	Ptbp2	-0.851041	6.68614	-2.27913	0.061108	0.531737	-3.81085
URIAAL_R11207	Lamc1	0.711222	3.83208	2.279	0.0611194	0.531737	-3.76664
URIAAL_R07219	Prvb	-2.32384	-3.35599	-2.27898	0.0611216	0.531737	-4.16681
URIAAL_R09262	Polr2h	0.471195	4.62915	2.26432	0.0612419	0.531737	-3.78834
URIAAL_R01024	Chrna6	3.01627	-1.37491	2.27756	0.0612425	0.531737	-4.05796
NA	NA	1.11359	-0.773544	2.26174	0.0612587	0.531737	-4.00727
URIAAL_R14753	Nab2	2.86099	-2.44211	2.27733	0.0612629	0.531737	-4.1167
URIAAL_R12345	Ctps2	-0.784959	4.93779	-2.27681	0.0613076	0.531737	-3.7878
URIAAL_R04011	Ebf1_1	2.92184	-3.26952	2.27656	0.0613289	0.531737	-4.15664
URIAAL_R06153	Hk1_0	-1.81214	3.63155	-2.27588	0.0613867	0.531737	-3.76748
URIAAL_R12513	Cd40lg	-1.51383	-0.439382	-2.27544	0.0614249	0.531737	-3.97693
URIAAL_R09336	Fbxl4	-0.98152	6.96944	-2.27536	0.0614315	0.531737	-3.81733
URIAAL_R05306	Man2c1_0	0.61722	4.58184	2.27533	0.0614346	0.531737	-3.78255
URIAAL_R14625	Slitrk3	2.14706	-4.22557	2.2751	0.0614544	0.531737	-4.18857
URIAAL_R07775	Spag9	-0.646338	7.38314	-2.27501	0.0614619	0.531737	-3.8207
NA	NA	2.06214	-4.51772	2.27487	0.0614737	0.531737	-4.19412
URIAAL_R09749	Syn2	1.85162	-4.62007	2.27473	0.0614857	0.531737	-4.19648
URIAAL_R05122	Slc17a9	1.38523	0.174044	2.27451	0.0615047	0.531737	-3.9169
URIAAL_R00088	Tnfsf8	-2.27859	-2.39965	-2.27433	0.0615206	0.531737	-4.12161
NA	NA	-0.70148	6.22511	-2.27372	0.0615727	0.531737	-3.81276
NA	NA	1.89027	-4.5923	2.27364	0.0615797	0.531737	-4.19621
URIAAL_R07587	Gucy2c	1.89027	-4.5923	2.27364	0.0615797	0.531737	-4.19621
URIAAL_R06432	Fbxl8	1.44939	0.819335	2.27276	0.061656	0.531737	-3.86314
URIAAL_R03131	Rrad	2.41664	-3.3085	2.27241	0.0616861	0.531737	-4.16656
URIAAL_R11489	Cd47	-0.614487	5.94476	-2.27221	0.0617034	0.531737	-3.81115
URIAAL_R03535	Fam210b	0.808136	2.96508	2.27173	0.0617446	0.531737	-3.77275
URIAAL_R11677	Itpripl2	1.41679	1.59798	2.27153	0.0617624	0.531737	-3.8135
URIAAL_R06137	Sfn	2.83319	-3.19252	2.27119	0.0617913	0.531737	-4.15709
URIAAL_R14639	Eif3g	0.895385	7.33483	2.27109	0.0618004	0.531737	-3.82477
URIAAL_R15120	Cdca2	-1.00917	1.81197	-2.27085	0.0618213	0.531737	-3.80199
URIAAL_R14464	Creb3	0.920566	2.31503	2.27048	0.0618534	0.531737	-3.78513
URIAAL_R15517	Csnk2b	1.16479	2.9486	2.2699	0.0619033	0.531737	-3.77499
URIAAL_R04794	Trip11	-0.818646	8.44097	-2.26918	0.0619663	0.531737	-3.83155
NA	NA	2.0067	3.81002	2.26896	0.0619851	0.531737	-3.77533
URIAAL_R14807	Lip2	0.369515	6.02001	2.25079	0.0620357	0.531737	-3.82725
URIAAL_R08807	Mmachc	-0.764472	2.97092	-2.26821	0.0620498	0.531737	-3.77606
URIAAL_R07653	Fscn2	2.46235	-3.1031	2.26813	0.0620567	0.531737	-4.15783
URIAAL_R01817	Pdcd4_1	-0.818612	6.72768	-2.26798	0.0620697	0.531737	-3.82421
URIAAL_R03050	Aebp2	1.03441	3.58594	2.26763	0.0621005	0.531737	-3.77619
URIAAL_R06205	Tspan15	-2.39517	-1.07151	-2.26737	0.0621231	0.531737	-4.04899
URIAAL_R08959	Ublcp1	-0.394996	5.89801	-2.24951	0.0621488	0.531737	-3.8271
NA	NA	-3.73009	-1.8529	-2.267	0.062155	0.531737	-4.08243
URIAAL_R07252	Abat	1.00543	-0.967639	2.24941	0.0621581	0.531737	-4.03152
URIAAL_R04080	Dennd6b	1.39087	-0.215755	2.26681	0.0621723	0.531737	-3.95958
URIAAL_R03284	Mfsd1	-0.739939	6.31464	-2.26625	0.0622204	0.531737	-3.82233
URIAAL_R00749	Pik3cd	1.48334	6.1423	2.26624	0.0622216	0.531737	-3.81818
URIAAL_R10811	Zbtb16	3.37447	-1.40403	2.2656	0.0622776	0.531737	-4.06285
URIAAL_R13069	Tspan18_1	2.27676	-3.77182	2.26554	0.0622828	0.531737	-4.18249
URIAAL_R07301	Ccp110	-0.693388	6.80543	-2.26505	0.0623256	0.531737	-3.82839
URIAAL_R00344	Stag2_0	-0.90016	7.17911	-2.26478	0.062349	0.531737	-3.83122
URIAAL_R03443	Hnf1b	3.37047	-3.00396	2.26467	0.0623582	0.531737	-4.1432
URIAAL_R00443	Tdg	-0.470687	6.3036	-2.26405	0.0623714	0.531737	-3.82484
URIAAL_R03942	Osbpl10	0.45846	5.77247	2.25817	0.062407	0.531737	-3.82164
URIAAL_R05095	Uckl1	0.991535	5.34101	2.2639	0.0624257	0.531737	-3.80948
URIAAL_R03870	Dym	-1.13243	5.44102	-2.26375	0.0624392	0.531737	-3.81111
URIAAL_R01428	Dusp19	1.03539	2.25078	2.26335	0.062474	0.531737	-3.79356
URIAAL_R11419	Psmg1	-0.586739	5.27543	-2.2628	0.0625225	0.531737	-3.81089
URIAAL_R09497	Rpl21	-0.36132	9.49133	-2.24501	0.062549	0.531737	-3.85151
URIAAL_R12553	Pls3	0.841989	1.97938	2.26238	0.0625588	0.531737	-3.8023
URIAAL_R12444	Gpr174_1	-1.22643	0.753288	-2.26187	0.0626037	0.531737	-3.87278
URIAAL_R08331	Ccdc90b	-0.567597	6.06523	-2.26173	0.0626157	0.531737	-3.82487
URIAAL_R04346	Prkaca	-1.03626	4.53991	-2.26158	0.0626291	0.531737	-3.79578
URIAAL_R03857	Smad2	-0.804801	5.22351	-2.26125	0.0626577	0.531737	-3.81098
URIAAL_R09694	Cdc42	-1.13863	5.91905	-2.26111	0.0626704	0.531737	-3.82219
URIAAL_R11887	Tcn2	0.895529	2.88023	2.26091	0.062688	0.531737	-3.78402
URIAAL_R14534	Ppp1ca	0.655413	4.0174	2.26057	0.0627174	0.531737	-3.78842
URIAAL_R11128	Mrpl1	-0.656229	4.83379	-2.25988	0.0627782	0.531737	-3.80483
URIAAL_R02512	Rem1	2.56834	-3.31174	2.25962	0.0628014	0.531737	-4.16938
URIAAL_R10268	Ilvbl	2.88237	-0.675176	2.25932	0.0628277	0.531737	-4.02685
URIAAL_R04864	Cbs_3	-1.6693	-2.34353	-2.25887	0.0628674	0.531737	-4.13247
URIAAL_R09258	Rnpepl1	-0.797486	4.20057	-2.25835	0.0629131	0.531737	-3.79356
URIAAL_R05999	Scg5	-2.83043	-3.33628	-2.25814	0.0629319	0.531737	-4.16786
URIAAL_R05812	Fads2	-1.96364	2.76537	-2.25703	0.0630301	0.531737	-3.79103
URIAAL_R00902	Lmna	2.78812	4.99843	2.25686	0.0630444	0.531737	-3.80055
URIAAL_R14621	Smim30	-1.46487	-1.65945	-2.25604	0.0630855	0.531737	-4.09704
URIAAL_R04777	Pygl	1.333	1.38683	2.25583	0.0631361	0.531737	-3.83764
URIAAL_R06251	Actg1	1.71414	7.13278	2.25492	0.0632164	0.531737	-3.84106
URIAAL_R08986	Slc25a48	0.983429	5.99906	2.25411	0.0632881	0.531737	-3.83178
URIAAL_R02315	Rmnd5a	-0.424392	6.09536	-2.24209	0.0632903	0.531737	-3.84145
URIAAL_R11894	Erp29	0.944209	5.13315	2.2538	0.063316	0.531737	-3.81703
URIAAL_R06863	Trim39_0	3.314	1.91694	2.2532	0.0633685	0.531737	-3.83645
URIAAL_R00976	Abhd11	0.523231	4.13157	2.24579	0.0634013	0.531737	-3.80219
URIAAL_R08888	Btf3l4	-0.544365	7.10352	-2.25267	0.0634161	0.531737	-3.84515
NA	NA	2.9185	-3.83088	2.25232	0.0634473	0.531737	-4.18637
URIAAL_R04133	Aqp3	0.94107	8.97022	2.25201	0.063475	0.531737	-3.85254
URIAAL_R13201	Rdh5_0	1.96803	-4.30647	2.25188	0.063486	0.531737	-4.19804
URIAAL_R11129	45180	1.30553	1.19256	2.25141	0.0635279	0.531737	-3.85142
URIAAL_R14505	Hars_1	0.582309	4.1298	2.25069	0.0635918	0.531737	-3.80082
URIAAL_R01152	Ddx49	0.631079	6.48091	2.2498	0.063672	0.531737	-3.84322
URIAAL_R15513	Rpp21	-0.992311	-0.288781	-2.23313	0.0637093	0.531737	-3.97334
URIAAL_R11906	Gas2l1_0	1.07414	1.17259	2.24932	0.0637144	0.531737	-3.85254
URIAAL_R04726	Polr2k	-0.872916	5.19466	-2.2491	0.0637345	0.531737	-3.82384
URIAAL_R07257	Parn	-0.63172	4.8212	-2.24877	0.0637632	0.531737	-3.81697
URIAAL_R03582	Fam110b	1.30321	-1.28765	2.24175	0.0637815	0.531737	-4.07197
URIAAL_R01703	Tbc1d12	0.817353	2.61757	2.2485	0.0637877	0.531737	-3.799
URIAAL_R11955	Triap1	-0.463934	5.80949	-2.2443	0.063823	0.531737	-3.83944
URIAAL_R14102	Raly	-2.66368	-1.34093	-2.24688	0.0639331	0.531737	-4.07242
URIAAL_R00139	Mrps2	1.24745	3.1366	2.24654	0.0639631	0.531737	-3.79669
URIAAL_R03914	Gcnt4	1.15856	2.0269	2.24596	0.0640153	0.531737	-3.8161
URIAAL_R05789	Ipo7	-0.578419	6.77111	-2.24573	0.0640355	0.531737	-3.8507
URIAAL_R08184	Ak4	-1.23364	4.72881	-2.24569	0.0640398	0.531737	-3.81639
URIAAL_R11280	Rpp25l	0.712463	3.95446	2.2454	0.0640653	0.531737	-3.80348
URIAAL_R12522	Phf6	-0.804886	5.45644	-2.2454	0.0640656	0.531737	-3.83348
URIAAL_R11890	Nf2_0	-0.504791	6.58167	-2.245	0.0641016	0.531737	-3.84995
URIAAL_R04810	Cnih1	1.04637	-0.242259	2.23534	0.0641093	0.531737	-3.97131
URIAAL_R08954	Fam193b	1.06804	4.97666	2.24398	0.0641933	0.531737	-3.82408
URIAAL_R12375	Pcyt1b	-1.16175	0.737811	-2.24352	0.0642346	0.531737	-3.88701
URIAAL_R08128	Vps51	0.941042	6.00134	2.24348	0.0642382	0.531737	-3.84415
URIAAL_R14246	Memo1	-0.679157	4.93092	-2.24347	0.0642388	0.531737	-3.82514
URIAAL_R00907	Twf2	0.763282	3.21323	2.24299	0.064282	0.531737	-3.80004
URIAAL_R08226	Ell	-0.943972	5.99297	-2.2424	0.0643352	0.531737	-3.84539
NA	NA	1.76651	2.81202	2.24198	0.0643731	0.531737	-3.8042
URIAAL_R04958	Wnt4a	-2.57089	-4.81629	-2.24186	0.0643839	0.531737	-4.20675
URIAAL_R02035	Rgs17	-2.55363	-4.82636	-2.24181	0.0643884	0.531737	-4.20699
NA	NA	0.49698	3.84081	2.22549	0.0644165	0.531737	-3.81407
URIAAL_R14892	Gbp	1.85511	1.22329	2.24147	0.0644195	0.531737	-3.86373
URIAAL_R02794	Fam43b	2.64125	-3.97407	2.2404	0.064516	0.531737	-4.19408
URIAAL_R07300		-0.492714	6.17578	-2.24033	0.0645225	0.531737	-3.85104
URIAAL_R10728	Pim1_0	1.3851	5.85618	2.24005	0.0645478	0.531737	-3.84425
URIAAL_R15204	Atrx_1	-1.13802	9.11551	-2.23947	0.0646009	0.531737	-3.86731
NA	NA	0.696609	5.68304	2.23813	0.0647218	0.531737	-3.84601
URIAAL_R00157	Zbtb43	-0.674383	7.1295	-2.23813	0.0647224	0.531737	-3.86222
URIAAL_R09791	Gigyf2	-0.751869	8.47457	-2.23809	0.0647254	0.531737	-3.86818
URIAAL_R04542	Adss	0.572641	6.02131	2.23734	0.0647934	0.531737	-3.85232
NA	NA	-0.673627	8.32327	-2.2373	0.0647973	0.531737	-3.86876
URIAAL_R05238	Plcl2_1	-0.897967	1.57462	-2.23648	0.0648717	0.531737	-3.84057
URIAAL_R12028	Mdfic	-0.75194	9.35414	-2.23594	0.0649212	0.531737	-3.87177
URIAAL_R07927	Lonrf1_0	-1.09159	6.15896	-2.2357	0.0649433	0.531737	-3.85501
URIAAL_R04322	Faf1	0.448696	5.32916	2.22626	0.0649465	0.531737	-3.84842
NA	NA	2.41355	-2.07497	2.23519	0.0649892	0.531737	-4.11811
URIAAL_R11927	Vps33a	-0.96669	6.75026	-2.23476	0.0650288	0.531737	-3.86287
URIAAL_R00237	Sh2d3c	1.34341	-0.052078	2.23443	0.0650582	0.531737	-3.96204
URIAAL_R07799	Smim5	1.34003	0.170251	2.23396	0.0651015	0.531737	-3.94206
URIAAL_R10152	Cyp20a1	1.10116	0.638573	2.23342	0.0651509	0.531737	-3.90084
URIAAL_R11588	Igfals	-0.744368	0.506984	-2.21632	0.0651631	0.531737	-3.91131
URIAAL_R07392	Med6	-0.47682	5.87247	-2.23126	0.0653487	0.531737	-3.85749
URIAAL_R06906	Entpd6	0.887731	2.22165	2.23062	0.0654078	0.531737	-3.82336
URIAAL_R05619	Lsr	-2.2245	-3.27872	-2.2306	0.0654088	0.531737	-4.1816
URIAAL_R07466	Kcnk13	2.44904	-0.847644	2.23043	0.0654251	0.531737	-4.04984
URIAAL_R01243	Clec2d	-1.56569	-0.719058	-2.23021	0.0654448	0.531737	-4.02894
URIAAL_R01927	Pgc_1	2.61481	-3.32589	2.2298	0.0654827	0.531737	-4.1797
URIAAL_R06954	Sult3a1	-2.52891	-0.275326	-2.22945	0.0655151	0.531737	-4.00267
URIAAL_R06282	Slc7a9_1	-1.64996	0.127151	-2.22904	0.0655523	0.531737	-3.95298
URIAAL_R10851	Tmem45b_1	-2.5688	-4.81629	-2.22896	0.0655602	0.531737	-4.21089
URIAAL_R11850	Kdm2b	0.777535	4.53684	2.22889	0.0655659	0.531737	-3.8322
URIAAL_R11311	Tmem214	0.880303	2.25398	2.22869	0.065585	0.531737	-3.82434
URIAAL_R14564	Taf6l	1.14246	1.24738	2.22862	0.0655908	0.531737	-3.86475
URIAAL_R13679	Rida	-1.01058	4.41	-2.22858	0.0655945	0.531737	-3.82925
URIAAL_R06324	Rnf166	0.536357	5.60502	2.22851	0.0656015	0.531737	-3.85609
URIAAL_R15522	Ccm2	0.973242	1.64452	2.22841	0.0656105	0.531737	-3.84466
URIAAL_R12932	Atp5f1d	0.795674	5.82344	2.22691	0.0657487	0.531737	-3.86093
NA	NA	-0.779441	6.41392	-2.22681	0.0657583	0.531737	-3.86906
URIAAL_R10128	Cps1	-1.14036	0.951122	-2.22648	0.0657882	0.531737	-3.88418
URIAAL_R04599	Plekhg1	1.99792	-0.955956	2.22612	0.0658214	0.531737	-4.05778
URIAAL_R01004	Hsdl2	1.75307	0.853995	2.226	0.0658323	0.531737	-3.89849
URIAAL_R07373	Scfd1	-0.458786	5.46614	-2.22004	0.0658559	0.531737	-3.86029
URIAAL_R12537	Ints6l	-0.744925	5.06371	-2.22571	0.0658598	0.531737	-3.84785
URIAAL_R08035	Degs1	-0.906428	7.7057	-2.22565	0.0658648	0.531737	-3.87996
URIAAL_R01613	Tbc1d2b	-0.787031	6.42353	-2.22519	0.0659079	0.531737	-3.87103
URIAAL_R01982	Zbtb18	-1.61868	2.95045	-2.22513	0.0659135	0.531737	-3.81869
URIAAL_R01386	Ndufa10	-0.445335	7.48799	-2.22329	0.0659233	0.531737	-3.88096
URIAAL_R07926	Dlc1_0	-2.50022	-4.8507	-2.22468	0.0659547	0.531737	-4.213
URIAAL_R07285	Prkar1b	-0.583872	2.51833	-2.20755	0.065985	0.531737	-3.82928
URIAAL_R01340	Slc25a12	-0.638692	6.01765	-2.22382	0.0660348	0.531737	-3.86786
URIAAL_R09072	Rragc	-1.43949	5.82399	-2.22365	0.0660499	0.531737	-3.86235
URIAAL_R02166	Tmem60	-0.597381	3.7262	-2.22313	0.0660984	0.531737	-3.82388
URIAAL_R05794	Pik3c2a	-1.02273	7.68185	-2.22288	0.0661219	0.531737	-3.883
URIAAL_R08768	Vps37b	-1.72478	2.23311	-2.22276	0.0661329	0.531737	-3.83298
URIAAL_R00622	Chml	-0.774115	6.80986	-2.22257	0.0661507	0.531737	-3.87782
URIAAL_R00655		0.769378	1.70519	2.21915	0.0661744	0.531737	-3.84745
URIAAL_R12933	Stk11	0.556439	7.35174	2.22224	0.0661808	0.531737	-3.88226
URIAAL_R07047	Klf12	2.82911	-1.03012	2.22168	0.0662325	0.531737	-4.06707
URIAAL_R14217	Sidt2	0.894799	4.24659	2.22115	0.0662822	0.531737	-3.83418
URIAAL_R05919	Clk4_1	-0.629082	7.544	-2.22001	0.0663883	0.531737	-3.88595
URIAAL_R04784	Klhl28	-0.794152	6.55717	-2.21959	0.066427	0.531737	-3.87891
URIAAL_R03692	Sult1d1	1.55094	1.09856	2.21906	0.0664772	0.531737	-3.8846
URIAAL_R11696	Pik3ap1	0.591416	4.13508	2.21801	0.0665748	0.531737	-3.83595
URIAAL_R14684	Ccdc150	-0.807641	1.33795	-2.21317	0.066603	0.531737	-3.86781
URIAAL_R06902	Pygb	1.35832	2.80435	2.21743	0.066629	0.531737	-3.82698
URIAAL_R07955	Frg1	0.741722	5.93906	2.21666	0.0667012	0.531737	-3.87467
URIAAL_R13148	Slc11a1	1.59597	-0.449964	2.2152	0.0668379	0.531737	-4.01324
URIAAL_R04799	Dicer1	-0.88742	5.80509	-2.2151	0.0668473	0.531737	-3.87404
URIAAL_R04438	Jagn1	0.744802	3.31197	2.21497	0.0668597	0.531737	-3.82842
URIAAL_R06855	Klf8	1.85404	1.58593	2.21497	0.0668598	0.531737	-3.86493
URIAAL_R15237	Dmac1	-0.576375	5.61267	-2.21464	0.0668905	0.531737	-3.87209
URIAAL_R06378	Dok1	1.05105	0.838521	2.21386	0.0669643	0.531737	-3.90041
URIAAL_R04385	Ccdc71	0.415037	4.86978	2.19708	0.0669793	0.531737	-3.86712
URIAAL_R00217	Tor2a	0.729029	4.69401	2.21354	0.0669939	0.531737	-3.85284
NA	NA	2.3825	-4.89087	2.21337	0.0670096	0.531737	-4.21751
URIAAL_R07659	Chmp6	0.655489	3.55897	2.21334	0.067013	0.531737	-3.83201
URIAAL_R03704	Mcub	0.80095	3.61306	2.21322	0.0670237	0.531737	-3.83262
URIAAL_R09736	Sos1	-1.81118	8.85677	-2.21282	0.067062	0.531737	-3.8977
URIAAL_R04105	Ahnak	1.44654	1.98912	2.21272	0.0670709	0.531737	-3.84747
URIAAL_R03148	Cdt1	1.09416	1.7322	2.21235	0.0671055	0.531737	-3.85538
URIAAL_R10360	Med10	-0.517152	5.73066	-2.21135	0.0672	0.531737	-3.87802
URIAAL_R13777	Thumpd2	-1.31429	1.32673	-2.21133	0.0672018	0.531737	-3.87556
URIAAL_R10910	Abcc10	0.939654	3.67155	2.21109	0.0672249	0.531737	-3.83533
URIAAL_R13588	Eogt	-1.45948	1.13688	-2.2109	0.0672425	0.531737	-3.88742
URIAAL_R05631	Ranbp9	-0.771456	5.94515	-2.21084	0.0672487	0.531737	-3.88149
URIAAL_R14556	Hnrnpa1l2	0.745708	5.85587	2.21073	0.0672591	0.531737	-3.88014
URIAAL_R06098	Pithd1	-0.422793	6.0793	-2.20063	0.0672754	0.531737	-3.89047
URIAAL_R04855	Ofd1	-0.737727	6.44282	-2.2105	0.0672805	0.531737	-3.88837
NA	NA	-0.806159	5.29364	-2.21008	0.0673204	0.531737	-3.87031
URIAAL_R00537	Jmjd6	-1.30644	7.4459	-2.20988	0.0673388	0.531737	-3.8966
URIAAL_R03765	Nadk	-0.588669	5.29696	-2.20957	0.0673686	0.531737	-3.87165
URIAAL_R10464	Lgals2	-1.20389	0.892398	-2.20952	0.067373	0.531737	-3.90167
URIAAL_R12395	Dmd_2	2.45075	-4.85646	2.2095	0.0673746	0.531737	-4.21804
NA	NA	0.500224	4.20117	2.20063	0.0674245	0.531737	-3.85152
URIAAL_R03975	Recql	-0.541138	3.81323	-2.20219	0.067532	0.531737	-3.84397
URIAAL_R00935	Mpdz	2.98594	-3.50103	2.20747	0.0675669	0.531737	-4.19056
URIAAL_R14181	Cep63	0.863242	2.51021	2.20718	0.0675946	0.531737	-3.83937
URIAAL_R01174	Sult4a1	1.11895	-0.510126	2.20122	0.0676024	0.531737	-4.0183
URIAAL_R12269	Rgs12	-1.11147	2.95723	-2.20687	0.0676237	0.531737	-3.83604
NA	NA	-0.397142	5.87625	-2.18989	0.0676701	0.531737	-3.89644
URIAAL_R04901	Tsta3	1.81742	1.72742	2.20598	0.0677084	0.531737	-3.86539
URIAAL_R08693	Sbno1	-0.606968	9.81757	-2.20555	0.0677496	0.531737	-3.90733
URIAAL_R14764	Gcdh	1.1703	2.45061	2.20542	0.067762	0.531737	-3.8423
URIAAL_R15563	A2ml1_1	2.58915	-3.83977	2.20528	0.0677758	0.531737	-4.20354
URIAAL_R06910	Ttbk1	0.847261	3.47725	2.20512	0.0677904	0.531737	-3.83951
URIAAL_R09976	Gtf3c2	0.447304	5.06463	2.19448	0.0678138	0.531737	-3.87807
URIAAL_R13890	Acdh6	1.85795	1.57413	2.20224	0.0680653	0.532486	-3.87612
URIAAL_R06145	Exosc3	-0.567991	5.61813	-2.20195	0.0680931	0.532486	-3.88675
URIAAL_R08619	Slc15a4	-0.660626	5.15789	-2.2008	0.0682028	0.532486	-3.87825
URIAAL_R08100	Stk25	0.579111	4.0154	2.20037	0.0682438	0.532486	-3.85249
URIAAL_R11805	Smndc1	-0.446306	7.50496	-2.20009	0.0682622	0.532486	-3.90913
URIAAL_R08276	Thbs4	1.71603	-1.88331	2.19999	0.068281	0.532486	-4.12991
URIAAL_R12988	Tstd2	0.650071	3.34579	2.19978	0.0683004	0.532486	-3.84399
URIAAL_R12046	Capza2	-0.609667	6.80993	-2.19971	0.0683075	0.532486	-3.90463
URIAAL_R07965	Gcfc2_0	-0.575496	4.63317	-2.19945	0.0683328	0.532486	-3.86742
URIAAL_R10282	Gfod1	1.24653	4.93787	2.19897	0.0683787	0.532486	-3.87272
[truncated: 13,597 more rows]

## Sheet: control vs babesia
gene	log_fold_change	ave_expression	p_val	adj_p_val
Anxa2_1	-2.39082	2.60502	0.000152353	0.951877
Leg4	-2.20319	2.4599	0.000453681	0.951877
Anxa2_0	-2.17743	2.75373	0.00051638	0.951877
Tnfaip8	-2.4007	1.40294	0.000571945	0.951877
	3.92778	-4.078	0.000619123	0.951877
Rem1	3.85234	-4.10958	0.000648255	0.951877
Onecut1	4.38589	-3.30779	0.000721423	0.951877
NA	3.87453	-3.56541	0.000782394	0.951877
Abral	-1.84759	3.13481	0.000917788	0.951877
Muc3b	3.93736	-4.06553	0.000936142	0.951877
Hmcn2_0	3.76679	-4.15002	0.000946548	0.951877
Csf2ra_0	-4.58972	-2.26091	0.000966701	0.951877
Ocstamp	-4.04182	-4.25258	0.00106299	0.951877
Il1rap_0	-1.446	3.49219	0.00110151	0.951877
Cmbl_1	-1.93581	2.15599	0.00111984	0.951877
Cartpt	3.69473	-4.18442	0.00125622	0.951877
Wdfy4_0	-2.28603	0.795021	0.00125937	0.951877
Spsb4	-4.13129	-4.19018	0.00137334	0.951877
Plb	-2.06374	2.78691	0.00137453	0.951877
Sbk2	3.43002	-4.32365	0.00149143	0.951877
Bcar1	3.42811	-4.32365	0.00161259	0.951877
Dock2_2	-1.35251	4.36315	0.00162787	0.951877
Upp1	-2.35086	-0.114758	0.00167859	0.951877
Prtg	3.73152	-4.16642	0.00178631	0.951877
Hecw1	3.43786	-4.31557	0.00187212	0.951877
NA	3.54634	-4.25915	0.00192802	0.951877
Abhd8	4.203	-3.92478	0.00199758	0.951877
Sdcbp	-1.08849	5.4185	0.0021831	0.951877
Cckar_1	4.17311	-3.92742	0.00230494	0.951877
Slc36a4_1	-3.58485	-3.18076	0.0023412	0.951877
Grin2c	4.59097	-3.71365	0.00238378	0.951877
C1qc	-2.70352	1.03632	0.00246658	0.951877
Acpp	-3.1477	-4.68585	0.0025596	0.951877
Il18r1	-4.81319	-3.13213	0.00259152	0.951877
Gsta3_0	-3.05632	-0.0168777	0.00285213	0.951877
Cldn22_1	3.63271	-3.68964	0.00295898	0.951877
Slc5a5	3.1167	-4.47658	0.00309522	0.951877
Atp6v1g3	-2.73317	-0.5438	0.00330431	0.951877
Cxadr	-4.10766	-3.46203	0.00331353	0.951877
Ly86	-1.60879	5.98893	0.00334531	0.951877
Znf544_1	3.79517	-3.07549	0.00336309	0.951877
Fam213a_1	-1.36512	5.56835	0.00342117	0.951877
Marveld2	3.76616	-3.60833	0.00342463	0.951877
NA	3.00061	-4.537	0.00355926	0.951877
NA	3.22123	-4.42425	0.0035882	0.951877
Cx3cr1	-2.16862	-0.370311	0.003609	0.951877
Bphl	-2.76132	-0.966497	0.00365009	0.951877
Ckb	-1.15499	3.9332	0.00402161	0.951877
Irs2a	1.057	8.457	0.00405073	0.951877
Il17rc_1	3.1515	-4.46499	0.00409522	0.951877
Cxcr3	-3.36965	-4.56966	0.00415665	0.951877
Ltc4s_1	-2.84402	-3.02325	0.0041913	0.951877
NA	2.82357	-4.62542	0.00421679	0.951877
Parva	-2.83093	-4.84766	0.00429259	0.951877
Ifng	-3.249	-4.64393	0.00440744	0.951877
Sh2d2a_1	2.93865	-3.51716	0.00457694	0.951877
Gpr65	-1.584	0.832576	0.00470531	0.951877
Slc35f1	3.21851	-4.43247	0.00472646	0.951877
Slc9a7	-1.17913	4.03648	0.0047829	0.951877
Gp1ba	2.56605	0.0779384	0.00484264	0.951877
Gjd3	3.06831	-4.50515	0.00491079	0.951877
NA	-2.6133	-2.18097	0.00498129	0.951877
Isyna1a	1.91972	0.091887	0.0051995	0.951877
Tm4sf18	-3.3073	-3.06868	0.00524002	0.951877
Kcnn3_1	4.49249	-3.00977	0.00524813	0.951877
Alox5	-1.39469	1.98747	0.00532907	0.951877
Hmox1	-1.08531	4.79296	0.0053362	0.951877
Spi1	-1.11081	4.96723	0.00535139	0.951877
Snrpb2	-1.35714	3.02097	0.00540973	0.951877
Adam23	3.58589	-3.45694	0.00553945	0.951877
Apcdd1	3.31456	-3.84962	0.00567794	0.951877
Cfap57	4.12916	-2.81054	0.00578704	0.951877
Srgn	-1.48599	5.75482	0.00594432	0.951877
Vcan	-1.80907	2.60735	0.0060033	0.951877
Sub1_1	2.90877	-4.5835	0.00618023	0.951877
Cotl1	-1.47927	2.29467	0.00648734	0.951877
Bckdhb	-1.71535	1.40852	0.00660468	0.951877
Fhl3	1.42797	2.36171	0.00662637	0.951877
Aqp9	-2.60154	-0.829802	0.00666606	0.951877
NA	-5.73738	-3.45255	0.00679552	0.951877
Dnah7	-2.10611	0.682828	0.00684897	0.951877
Fndc9_0	3.00712	-4.52949	0.00706974	0.951877
Kcne5	2.44986	-2.57389	0.00709228	0.951877
Eno1	-0.94179	5.14077	0.00716744	0.951877
Rsph4a	3.29734	-3.62425	0.00722544	0.951877
Fam213a_0	-1.30899	5.53766	0.00727859	0.951877
Cryzl1	-1.34457	3.24183	0.00729681	0.951877
Golim4_0	2.75486	-4.65808	0.00745205	0.951877
Tspan10	3.44464	-4.30775	0.00747589	0.951877
Bnc1	3.44464	-4.30775	0.00747589	0.951877
Nodal	2.92676	-4.56966	0.00752724	0.951877
Prdm16	2.83391	-4.61791	0.00752931	0.951877
Sema5b	2.83391	-4.61791	0.00752931	0.951877
Prss27	3.86919	-3.32954	0.00759878	0.951877
NA	-2.55042	-3.15599	0.0076764	0.951877
Lrmp_1	2.54299	-4.76676	0.00775217	0.951877
Ca4	2.85222	-3.55116	0.00775654	0.951877
Kcna4	2.83308	-4.61791	0.0077699	0.951877
Osbpl3	-2.25637	-0.483112	0.00781248	0.951877
NA	3.11486	-3.94418	0.00788205	0.951877
Mep1b	3.04151	-4.5211	0.0079321	0.951877
NA	4.48767	-3.7537	0.00802796	0.951877
Lhx1	2.96087	-4.5534	0.00813108	0.951877
Clic5	3.51335	-3.73299	0.00813283	0.951877
Racgap1_1	4.01041	-4.01684	0.00820159	0.951877
Ism2	2.54155	-4.76676	0.00822973	0.951877
Gpr82	-3.65138	-3.47664	0.00829925	0.951877
Ankrd7	2.57759	-1.85881	0.00838799	0.951877
Ptprn	3.72236	-4.16642	0.00845264	0.951877
Nfyb	-1.56086	3.06247	0.00849861	0.951877
Rnasel	1.44732	4.22808	0.00851	0.951877
Lamb2_1	3.00373	-3.21665	0.00878891	0.951877
Hopx	-1.57609	0.377943	0.00893385	0.951877
NA	3.06082	-4.5026	0.00904011	0.951877
G6pc2	-2.98852	-4.75924	0.00904741	0.951877
Sp6	3.61674	-4.21348	0.00910358	0.951877
NA	4.06293	-2.91475	0.00915175	0.951877
Cp37	-1.11223	6.3688	0.00917756	0.951877
Ppia	-0.969403	4.86219	0.00930663	0.951877
Liph_0	-4.31276	-2.8793	0.0095898	0.951877
Fam174b	-3.41224	2.01759	0.00968775	0.951877
Cfd_1	3.31754	-1.97598	0.00972429	0.951877
Galr2_2	3.10447	-3.69549	0.00985398	0.951877
Kcam	3.63273	-4.20834	0.00993544	0.951877
Sorbs3	3.14333	-4.46067	0.0100022	0.951877
Cryba1	3.05713	-4.5026	0.010034	0.951877
Hsp90aa1	1.60212	9.83148	0.0100612	0.951877
Slc38a3_0	2.9368	-4.0347	0.0101005	0.951877
Cdh17	-1.47145	2.23124	0.0103192	0.951877
NA	1.94876	-0.161432	0.0103815	0.951877
Csf2ra_2	-2.71201	-1.04922	0.0105311	0.951877
Tmem117	2.56016	-4.75924	0.0105711	0.951877
Cnp_0	2.94205	-2.15668	0.0108328	0.951877
NA	3.36688	-4.34566	0.0108667	0.951877
Calhm5	2.69107	-4.69474	0.0109222	0.951877
Synpo2	3.13965	-4.46067	0.0109642	0.951877
Vnx1	1.73014	1.75572	0.0111695	0.951877
Fam49a_1	-1.5726	1.17588	0.0112797	0.951877
Homer1	-3.26438	-3.84393	0.0113973	0.951877
Ctsl_1	-0.714567	6.98798	0.0114498	0.951877
Gulo	3.08375	-3.96043	0.0117093	0.951877
Abcc1_1	-0.964114	7.20532	0.0117474	0.951877
C1qa	-2.92609	0.455237	0.0118062	0.951877
Adhfe1	-4.07075	-3.64168	0.011822	0.951877
Pgm5	-3.45842	-3.74374	0.0120719	0.951877
Bank1	-2.01994	-1.14626	0.0120882	0.951877
Gpatch3	0.986618	4.80199	0.0121177	0.951877
Mthfd1	-1.42424	0.949884	0.0122756	0.951877
NA	2.96274	-3.77054	0.0122766	0.951877
Frmd3	-2.75879	-4.35375	0.0124459	0.951877
Hikeshi	-0.820573	3.79762	0.0124484	0.951877
Nkl	-2.10625	-1.06705	0.0124591	0.951877
Var1	-1.7414	0.732881	0.012515	0.951877
Dnajb11	-0.763364	5.81339	0.0125465	0.951877
NA	1.15408	4.41907	0.0126001	0.951877
Klk14_1	2.55466	-4.75924	0.0127066	0.951877
NA	-1.57642	0.858	0.01276	0.951877
Pak6	2.69665	-4.69248	0.0128725	0.951877
Drp2	1.77421	0.827733	0.0128993	0.951877
Neuv	2.71544	-4.15002	0.0129302	0.951877
Cux2	4.08127	-3.97035	0.0130609	0.951877
Radil	3.11073	-3.94825	0.0130643	0.951877
Rubcn	0.94407	4.95627	0.0131624	0.951877
Dstn	-0.910387	3.42589	0.0132995	0.951877
NA	-1.77978	-1.00221	0.0134396	0.951877
Mrc1_2	-1.38268	1.37692	0.0135973	0.951877
Tmem14c_0	-1.01385	3.72489	0.0136612	0.951877
Arhgef11_1	2.51923	-2.68957	0.0137194	0.951877
Znf319	1.58622	2.15919	0.0137285	0.951877
Mapk12	1.46895	2.28879	0.0138968	0.951877
Itgb3	1.2175	5.4563	0.0140171	0.951877
Slc24a2	-2.51121	-1.22304	0.0140491	0.951877
Rnf166	0.867601	5.27571	0.0141736	0.951877
Sdk2	2.21526	0.985708	0.0142584	0.951877
Slc25a30	-1.73682	4.70576	0.0144443	0.951877
Pgf	-2.61144	-4.95001	0.0144497	0.951877
Slc8b1	1.27891	2.49901	0.0145079	0.951877
Cyp27b1	3.09104	-4.48541	0.0145602	0.951877
Erg	-1.95898	-1.74796	0.0146057	0.951877
Rdh5_1	2.00886	-1.10079	0.0148234	0.951877
NA	-3.15724	-3.61566	0.0149613	0.951877
Gabrr1	2.90853	-3.8032	0.0151832	0.951877
Gabrp_1	2.71788	-4.15002	0.0152013	0.951877
Rasa4b	3.54092	-4.26647	0.0152677	0.951877
Lrrc74a	3.10194	-3.56299	0.0153001	0.951877
Trim41_0	0.801095	5.17571	0.0153329	0.951877
Gjc1_0	2.99415	-3.6101	0.0153699	0.951877
Ptgs1	1.19948	3.22056	0.0154463	0.951877
Cgnl1	-3.22055	-3.5916	0.0155949	0.951877
Fermt1	-1.20079	1.05109	0.0156322	0.951877
Rdh5_0	2.54802	-4.75924	0.0156559	0.951877
P2ry4	2.54802	-4.75924	0.0156559	0.951877
Neurod6	2.54802	-4.75924	0.0156559	0.951877
Sipa1l2	-1.08789	2.02847	0.0157819	0.951877
Ap1s2	-1.22213	2.42523	0.0157966	0.951877
Creb3l2	1.06508	1.38335	0.0158451	0.951877
Fam229a	3.43067	-3.53045	0.0159207	0.951877
Cfl2	1.12932	2.54521	0.0159451	0.951877
Gja10	1.36724	0.631652	0.0160657	0.951877
Cep112	-1.35934	2.34184	0.0162197	0.951877
Tnrc18	1.11026	3.59921	0.016334	0.951877
Ahr_2	-2.26498	-0.125037	0.0163729	0.951877
Spire2	3.3491	-3.10585	0.0164135	0.951877
Ccdc17	2.54836	-4.23843	0.0165085	0.951877
Cfd_0	3.74665	-2.93982	0.0165239	0.951877
NA	1.18989	1.35956	0.0166072	0.951877
Il16_0	3.44848	-3.23619	0.0166513	0.951877
Opn4_0	2.41524	-4.30083	0.0167566	0.951877
Fam43b	3.20639	-4.42683	0.0168412	0.951877
Adamts10	3.69926	-2.93486	0.0169174	0.951877
Zc3h3	0.740478	4.39687	0.0169437	0.951877
B3glct	-3.17894	-2.21757	0.0169526	0.951877
Cpsf4	3.11494	-1.53709	0.0170626	0.951877
Ticam1	1.1208	2.00841	0.0171441	0.951877
Rasgef1a	-1.66622	-0.533184	0.0172475	0.951877
Ttll12	-0.936014	4.48811	0.0173135	0.951877
B3gnt2	-2.55327	0.953391	0.0175131	0.951877
Ly96	-2.6568	3.68373	0.0175805	0.951877
Nlrc4	-1.07859	2.84861	0.0176019	0.951877
Cyb561d2	0.705341	5.20572	0.0176782	0.951877
Rassf3	-2.36658	-2.07374	0.0177039	0.951877
Rps24	-0.762061	10.5317	0.017745	0.951877
Pcdh10_1	3.40708	-3.54043	0.0181815	0.951877
Thbs4	-2.0197	-0.193315	0.0182575	0.951877
Lpgat1	-0.894911	3.27433	0.0183935	0.951877
Cd44	-1.1191	4.61334	0.0184826	0.951877
Mms19	0.761795	5.34157	0.0184859	0.951877
Bend4	-2.52546	-0.401898	0.0186451	0.951877
Tti1	0.960759	4.9587	0.0186493	0.951877
NA	2.7226	-3.90226	0.0187102	0.951877
Ss18l2	-0.899007	3.51982	0.0188787	0.951877
Txnip	1.11288	9.76208	0.0188871	0.951877
Zik1_1	2.25015	-3.85576	0.0188969	0.951877
Tank	-1.15387	1.48239	0.0189081	0.951877
Canx_0	-0.908476	7.19235	0.0189965	0.951877
Igfbp1	2.77474	-4.64393	0.019005	0.951877
Hoxb13a	2.77474	-4.64393	0.019005	0.951877
Neurl1b	2.77474	-4.64393	0.019005	0.951877
Gpr142	2.09503	-4.98899	0.0190068	0.951877
Bst1	-1.40235	1.92681	0.0191275	0.951877
Rbm15	0.833353	5.99774	0.019186	0.951877
Icoslg	-2.65516	-1.19462	0.0191903	0.951877
Sigmar1	2.73839	-4.13566	0.0191914	0.951877
Pgc_1	2.54372	-3.44851	0.0194751	0.951877
Slc1a6	-1.60724	1.00556	0.0195222	0.951877
NA	-2.76129	-4.34566	0.0196705	0.951877
Hspa14	-1.73195	1.19089	0.0196853	0.951877
Bmp2b	3.15723	-4.45063	0.0197134	0.951877
NA	2.32348	-2.41248	0.0197357	0.951877
Gcsh_0	-1.23866	1.83052	0.0198478	0.951877
Cacnb3_1	2.61512	-3.01379	0.019852	0.951877
Cyp26a1	3.33895	-4.35929	0.019904	0.951877
Cdh22	3.33895	-4.35929	0.019904	0.951877
Spef2	2.58213	-4.21425	0.0200076	0.951877
Ginm1	-0.800528	5.99693	0.0200484	0.951877
Slco2a1	2.48785	-1.344	0.0201068	0.951877
Prickle2	1.93348	-0.520062	0.0201655	0.951877
Sasb_0	2.43783	-4.04134	0.0201981	0.951877
NA	0.866199	3.86862	0.0202367	0.951877
Foxq1	2.88519	-4.58781	0.020314	0.951877
Rarb_1	3.09579	-3.70814	0.0203822	0.951877
Acod1_0	-1.17484	0.932701	0.0204413	0.951877
Paqr6	1.66389	-0.398525	0.0204621	0.951877
Ssh1	0.866749	2.68082	0.0205426	0.951877
Bcl2l15	-1.30627	1.45203	0.0205902	0.951877
Hhip	2.32262	-3.32407	0.0206049	0.951877
S100a4	-2.5433	3.9219	0.0206544	0.951877
Enpp7	2.85706	-4.602	0.0207008	0.951877
Zpr1	0.855172	5.24686	0.020714	0.951877
Myo9a_2	-3.14845	-3.72734	0.0207532	0.951877
Atp6v0a1	0.591941	5.95477	0.0207903	0.951877
A2m_3	1.50064	0.414853	0.0208229	0.951877
Unc5a	1.34534	0.0602301	0.0208556	0.951877
Tmem60	-0.854152	3.69352	0.0209351	0.951877
Abca1_2	3.40317	-4.33027	0.0209953	0.951877
Tob2	1.03779	5.50726	0.021295	0.951877
Igdcc3	3.43411	-4.30957	0.0212992	0.951877
Aph1a	1.06113	3.93948	0.0213086	0.951877
Scnn1b	3.00804	-2.30797	0.0214944	0.951877
Rasgef1b	-3.16469	-2.91203	0.0215266	0.951877
NA	2.58454	-4.74074	0.0215306	0.951877
Gldn	1.97132	-1.48797	0.0216629	0.951877
Arhgap35_1	0.855257	2.36158	0.021741	0.951877
Rtkn2	-2.30067	-1.67184	0.0218557	0.951877
Ephx2	1.87498	2.19013	0.0218761	0.951877
NA	2.5937	-3.96676	0.021893	0.951877
Agpat2	-2.03791	-0.427677	0.0219271	0.951877
Gdpd5_1	2.50443	-4.7809	0.0219285	0.951877
Esrp1	2.6127	-4.20082	0.0219444	0.951877
Ogfrl1	-0.815533	5.08901	0.0221154	0.951877
Glp2r	2.74588	-3.88586	0.0221376	0.951877
Trdmt1	-0.757268	5.91874	0.0221504	0.951877
Dixdc1	-2.59935	-4.44217	0.0222669	0.951877
NA	-3.25424	-1.84752	0.0223038	0.951877
Atp1b4	3.34457	-2.10472	0.0223122	0.951877
Cnih3	2.92724	-4.56632	0.0223163	0.951877
Gas7	-1.17787	0.912785	0.0224522	0.951877
Twist2_0	-2.80549	-4.84766	0.0224996	0.951877
Pi4kb_0	0.879507	6.32428	0.0225178	0.951877
Cd93	0.985662	2.36701	0.0225692	0.951877
Lin9	-0.727342	4.12571	0.0226295	0.951877
NA	2.85827	-4.60355	0.0227281	0.951877
Rps7	-0.619539	9.41964	0.0227544	0.951877
Cct6	0.688323	6.65351	0.0227816	0.951877
NA	-2.77761	-0.992351	0.0228793	0.951877
Utp14a	0.941182	5.70444	0.0231428	0.951877
Gchfr	2.64957	-4.70633	0.0232626	0.951877
Dnal1	-1.23449	0.825678	0.0232905	0.951877
Bub3	-0.668093	6.90858	0.0233222	0.951877
Lhx3	2.37252	-4.31934	0.0234198	0.951877
NA	2.37252	-4.31934	0.0234198	0.951877
Fam222b	0.777461	4.23778	0.0234635	0.951877
Nek8	1.53601	0.430623	0.0234695	0.951877
Gpr61	3.11242	-3.70908	0.0234843	0.951877
Ccl5_0	-1.92866	-1.71997	0.0235616	0.951877
Il31ra	-1.25713	1.16393	0.0235905	0.951877
Pde8b_1	3.01498	-3.38434	0.0237287	0.951877
Pgd	-0.968845	4.6438	0.023828	0.951877
Hsp70	0.984982	11.2791	0.0239158	0.951877
Mrc1_0	-1.74328	0.932067	0.0239475	0.951877
Ttbk1	1.16212	3.15926	0.0239628	0.951877
	-0.748817	3.18424	0.0239688	0.951877
NA	2.27922	-2.43433	0.0239817	0.951877
Gga1	1.00133	4.81116	0.02399	0.951877
Tbc1d9	2.79531	-2.39698	0.0241145	0.951877
NA	2.17272	-4.95001	0.0242615	0.951877
Evx2	2.76129	-4.64949	0.024422	0.951877
Nr0b2_1	2.31398	-4.88207	0.0244292	0.951877
Slc25a1	1.05634	3.32218	0.0247373	0.951877
Capn15	0.873607	3.73562	0.0248598	0.951877
NA	3.61102	-3.66876	0.024909	0.951877
Mcf2l_1	-3.11102	-1.58146	0.0250673	0.951877
Fam178b	2.8085	-4.62542	0.0250851	0.951877
Cic	1.58691	-0.131914	0.0251416	0.951877
Bahcc1	2.75943	-3.58984	0.0252356	0.951877
Apod	3.44933	-4.3055	0.0252695	0.951877
Msl2	0.873782	4.70289	0.0252768	0.951877
Tmem259	0.774992	5.18201	0.0253896	0.951877
Arl13a	2.13505	-4.97049	0.0253945	0.951877
Etv5	3.45526	-3.05576	0.0254117	0.951877
Rpp21	-1.71664	-0.0759923	0.0254604	0.951877
Lamb3	2.32954	-1.49865	0.0254984	0.951877
Ndk_1	-0.834091	3.41628	0.0255508	0.951877
Disp3	1.15005	0.853836	0.0255569	0.951877
Irs1	1.38768	0.706576	0.0255654	0.951877
Atg9a	0.876808	6.08613	0.0256299	0.951877
Apbb1	1.23855	3.67734	0.0256937	0.951877
Ostm1	-0.744131	4.20902	0.0257352	0.951877
Znf544_0	2.31435	-0.793123	0.0257702	0.951877
NA	-1.10796	1.43097	0.0258437	0.951877
Mlh1	-0.799825	3.73652	0.025866	0.951877
Angpt1	-1.2983	1.35598	0.02593	0.951877
Tcte3	2.1307	-4.44217	0.0260956	0.951877
Arhgap15_0	-1.1897	3.05564	0.0262506	0.951877
Slc2a6	-1.75736	-0.849182	0.0264051	0.951877
Itgb5	2.15547	-1.48988	0.026432	0.951877
Tbc1d1	-1.13816	1.97708	0.026458	0.951877
Slc30a3	1.23838	0.279187	0.0264686	0.951877
Slc9a3r1	0.838028	4.15271	0.026508	0.951877
Slc15a2	2.83184	-3.54742	0.0266082	0.951877
Asb15	1.5724	0.152457	0.0266855	0.951877
NA	1.00651	3.862	0.0266861	0.951877
Sympk	1.13544	3.68008	0.0267123	0.951877
Fdft1	1.44329	-0.0907645	0.0267527	0.951877
Hectd2	-3.62611	-3.45196	0.0269893	0.951877
Stx1a	2.17518	-1.09666	0.0270276	0.951877
Rhog_1	1.36385	4.20201	0.0271706	0.951877
Rpl24	-0.65488	8.30292	0.0274182	0.951877
Ppp1r10	1.12485	5.5309	0.0274312	0.951877
Rnf144a	-1.282	2.26576	0.0275069	0.951877
Ice2	-0.982403	4.34849	0.0277485	0.951877
	-0.998337	5.34004	0.0278813	0.951877
Bmp3	3.13496	-4.46067	0.0279087	0.951877
Olfml3	1.78233	-1.67817	0.0279743	0.951877
Fnip2	-1.50882	-0.478253	0.0279882	0.951877
Csrnp2_1	1.3153	1.69584	0.0280796	0.951877
Hsd11b2	1.32535	1.04748	0.028223	0.951877
Klc1	-0.757445	4.41	0.0282653	0.951877
Cry2_1	0.740885	4.633	0.0283301	0.951877
Cnep1r1	-0.679332	5.68935	0.0283882	0.951877
Mark2	0.891427	3.54336	0.0284479	0.951877
Dnal4	-1.29661	1.4158	0.0285393	0.951877
Tmem246	2.03694	-2.24878	0.0286024	0.951877
NA	3.64741	-3.63999	0.0286416	0.951877
Man2a2	0.901839	2.90813	0.0286966	0.951877
Gnptab	-0.806727	2.80964	0.0287038	0.951877
NA	0.975157	1.51384	0.0287041	0.951877
Shisa2	3.49082	1.61562	0.0287361	0.951877
Ebf1_1	3.49354	-3.72229	0.02885	0.951877
Tcc4	-1.61593	0.464808	0.0289264	0.951877
Cwc15	-0.712132	6.45953	0.0289289	0.951877
She	1.42211	1.31	0.0289474	0.951877
Llgl1	0.871167	3.02623	0.0289534	0.951877
Tmem39a	0.750417	3.52046	0.0292939	0.951877
NA	2.69779	-2.57153	0.0293324	0.951877
NA	-1.7726	-0.0623307	0.0294479	0.951877
P2ry13	-2.52851	1.04445	0.0294949	0.951877
Igfbp3	1.55542	1.46413	0.029563	0.951877
Arid1a_0	0.777325	5.65188	0.0295961	0.951877
Znf397_3	2.53761	-4.24099	0.0296284	0.951877
Cd74	-1.60842	3.67743	0.0296918	0.951877
Msmb_0	-2.69699	0.26983	0.0298959	0.951877
Amigo1	3.52222	-3.46446	0.0299101	0.951877
Gapdh	-0.644147	6.20159	0.0299403	0.951877
Spata7_0	-2.63871	-3.46805	0.0299748	0.951877
Cers4_0	2.91131	-2.12336	0.0299988	0.951877
Ablim3_0	2.30621	-4.88207	0.0301311	0.951877
NA	0.941359	4.35045	0.0301389	0.951877
M126	-1.01616	9.35065	0.0301674	0.951877
Pi4kb_1	1.45733	0.940119	0.0302933	0.951877
Prph2	2.49435	-1.50204	0.030357	0.951877
Pla2g12a	-0.815942	3.10667	0.0303795	0.951877
Ncf4	-1.32916	1.1979	0.030406	0.951877
Hip1	1.10326	4.20471	0.0304519	0.951877
Plppr3	2.83027	-2.89075	0.0304964	0.951877
Serpinb5	2.12947	-4.97049	0.030609	0.951877
Phactr1	4.7466	-2.64009	0.0306489	0.951877
Frem2_1	2.1826	0.920959	0.0306777	0.951877
Klhdc3	1.01161	4.74273	0.0307507	0.951877
Slc9a9	-1.29787	-0.256377	0.0308033	0.951877
Nxn	1.75367	-0.412938	0.0308574	0.951877
Leprotl1	-0.651842	4.95185	0.0308743	0.951877
Suclg2	-1.35812	2.24781	0.0309684	0.951877
Tspan18_1	2.47059	-4.02719	0.0310003	0.951877
Cep295_0	-0.975749	2.43624	0.0313276	0.951877
Trim41_3	0.748043	3.55068	0.0313429	0.951877
Rpl36	-0.699842	7.42453	0.031408	0.951877
Dctn4	0.693061	4.85192	0.0317015	0.951877
Pbxip1_1	2.94605	-2.55153	0.0318271	0.951877
Tmc2	3.20961	-2.97137	0.0318647	0.951877
Sh3bgrl3	-0.856759	3.41485	0.0318951	0.951877
Pdzd2_1	-3.3491	-4.60824	0.0319494	0.951877
Szt2_1	0.761711	5.20057	0.0319559	0.951877
NA	2.11738	-2.33355	0.0320076	0.951877
Tspo_1	-0.826889	5.93192	0.0320367	0.951877
Rnf182_0	2.29967	-3.29492	0.0321577	0.951877
NA	-2.22772	-1.46878	0.0322181	0.951877
Cckar_0	2.38014	-2.83714	0.0326817	0.951877
Lpin1	-1.80236	-1.45067	0.0327303	0.951877
Hyi	1.08633	1.31921	0.0328151	0.951877
Adap1_0	-1.02027	2.34834	0.0330528	0.951877
NA	2.00882	-5.03092	0.0330608	0.951877
Tmem63c	3.1894	-4.43171	0.0332022	0.951877
Airc	-1.49908	0.312591	0.0332194	0.951877
Znf469	1.93855	-2.17399	0.0332281	0.951877
Coa7	1.04463	4.31887	0.0332664	0.951877
Nsl1	-1.16137	4.24961	0.0332753	0.951877
Arnt	0.614509	6.68116	0.0333707	0.951877
Lrrc34	1.20634	0.772211	0.0333857	0.951877
Sec31b	0.936473	5.55423	0.0335525	0.951877
	-2.00061	-0.888755	0.033652	0.951877
Ccnyl1b	-0.651839	4.93101	0.0337907	0.951877
Tnfsf15	-3.08318	-4.73666	0.0339426	0.951877
Obscn_6	2.37056	-4.84766	0.0339971	0.951877
Galr2_0	-1.66723	-0.733191	0.034178	0.951877
Snx16	-0.88675	2.17038	0.0341967	0.951877
Gpr17	-2.34944	1.99873	0.0345487	0.951877
Arl6ip1	-0.646265	6.03074	0.0346695	0.951877
Slc35c2	0.835257	2.77349	0.0347746	0.951877
Rpl11	-0.75176	8.12199	0.0348614	0.951877
Pigl	-0.7812	3.2235	0.0348966	0.951877
Fsd1	2.06722	-1.90362	0.0349149	0.951877
NA	-1.75656	0.550416	0.0349638	0.951877
Vps29_0	-1.65482	3.86131	0.0349986	0.951877
Spo11	2.00644	-4.5026	0.0350855	0.951877
Slc6a17	2.30015	-4.88207	0.0350919	0.951877
Rpl29	-0.710347	9.14481	0.0351019	0.951877
Atp5o	-0.651821	6.31295	0.0351538	0.951877
Nr1d1	2.42984	-4.81756	0.0352286	0.951877
Stag2_2	-1.73181	-0.534389	0.0352976	0.951877
Tbxa2r	1.2472	2.04545	0.0354607	0.951877
NA	-1.28708	0.147123	0.0357244	0.951877
Dmwd	1.08873	5.04498	0.0358014	0.951877
Clcn2	3.62503	-3.64991	0.0359302	0.951877
Vat1	1.99314	-2.66834	0.0360237	0.951877
Znf366	-2.58042	-3.27923	0.0360934	0.951877
Gcsh_1	-1.22347	1.49436	0.0360981	0.951877
Cacna1c_0	3.5409	-2.39093	0.0362528	0.951877
Adgra3_0	-2.68531	-3.85984	0.0363671	0.951877
Sybu	-3.5245	-3.72408	0.0365449	0.951877
Ccdc166	-1.13952	1.10058	0.0365998	0.951877
Col4a1_1	2.86092	-3.6769	0.0366689	0.951877
Agk	-1.13381	0.76478	0.036682	0.951877
Arap2	-1.30478	2.11631	0.036741	0.951877
Ldha	-0.646078	7.06031	0.036768	0.951877
Slc7a2_1	2.98161	-3.4892	0.0369219	0.951877			58
Fnbp4	0.600997	5.96931	0.0370006	0.951877			4
Znf865_2	2.22646	-1.82423	0.0370094	0.951877
Sec14l1_1	1.13511	4.64088	0.0370125	0.951877
Wscd2	3.54089	-4.24672	0.0370588	0.951877
Crip1	-1.65276	1.80669	0.03707	0.951877
Phf14	-1.21589	2.26505	0.03711	0.951877
Slc4a11	-1.20516	-0.109154	0.03711	0.951877
Pigt	0.990588	3.8328	0.0372314	0.951877
Tspan13	-0.878188	5.34549	0.0372828	0.951877
Ifrd1	0.761387	9.00511	0.0373318	0.951877
Znf385b_0	2.42699	-4.81756	0.0373573	0.951877
Nxph1_1	2.42699	-4.81756	0.0373573	0.951877
Ppp1r32	1.57366	1.62815	0.0373884	0.951877
Usp39_0	0.994824	3.11372	0.0375263	0.951877
NA	2.17806	-3.24222	0.0376195	0.951877
Irf2bpl	0.742086	2.70369	0.0376337	0.951877
Dmbt1_13	2.52971	-4.76676	0.037681	0.951877
Cped1	2.73016	-3.891	0.0378618	0.951877
Wnk3	1.77509	-2.50569	0.0378821	0.951877
NA	-1.00016	2.48308	0.0379268	0.951877
Map2k7	0.623122	5.4345	0.0379522	0.951877
Trdc_1	-1.47969	1.61594	0.0379673	0.951877
Rgma	2.90983	-3.80181	0.0380261	0.951877
Ankrd24	2.01071	-0.570225	0.0380448	0.951877
Thpo	1.10741	1.00246	0.0380564	0.951877
Myef2	-0.816233	4.1984	0.0380652	0.951877
Slc19a2	2.70457	-2.21592	0.0381	0.951877
Notum	3.0796	-2.66744	0.0381469	0.951877
Rps3a	-0.691542	10.1028	0.0381553	0.951877
Sytl4	2.44223	-2.26365	0.0382519	0.951877
Fam198a	1.70057	-2.28887	0.0383857	0.951877
NA	-2.96304	-2.9731	0.0384356	0.951877
Glis2	1.87818	-1.67415	0.0385127	0.951877
Znf37a	2.47958	-4.79082	0.0385385	0.951877
NA	0.61607	7.21364	0.0386122	0.951877
Sft2d2	-2.26455	-1.8589	0.0386505	0.951877
Serpinb6_1	-1.99412	-1.52579	0.0386728	0.951877
Tmem50b	-0.623872	5.4856	0.0389549	0.951877
G2e3_1	-0.842499	3.99095	0.0389829	0.951877
NA	3.0479	-4.5026	0.0390212	0.951877
Fah	1.36344	-0.718705	0.0391129	0.951877
Abcg2	-1.4204	4.35702	0.0391276	0.951877
Ndufa10	-0.534357	7.36483	0.0392143	0.951877
Kri1	0.882803	3.28021	0.0392541	0.951877
Hbegf_1	1.64814	-0.0520165	0.0392621	0.951877
Rpl27	-0.700805	9.33569	0.039324	0.951877
Btd	-1.27564	3.15748	0.0393692	0.951877
Arl4a	-0.721023	8.14753	0.0393796	0.951877
Chrm2	2.3747	-4.31934	0.0393905	0.951877
Igsf6	-1.02631	2.5116	0.0395431	0.951877
Sytl2_0	2.59874	-3.96676	0.0397406	0.951877
Six4	0.796077	4.77791	0.0399709	0.951877
Otop3	1.84713	-5.11182	0.0402324	0.951877
Calb2	1.84713	-5.11182	0.0402324	0.951877
Tubgcp3	-0.768603	3.06339	0.0403538	0.951877
Ankrd33b	2.22838	-4.15002	0.0406745	0.951877
Snrpd3	-0.604464	5.50053	0.0407795	0.951877
Lmln	-0.86725	3.84444	0.0408285	0.951877
Hht1	1.27519	0.924652	0.0408608	0.951877
Nptx2	-2.91715	-2.73891	0.0409625	0.951877
Tnr	2.65631	-3.63584	0.0409786	0.951877
Ppp1r3d	-2.5343	-5.0049	0.0409887	0.951877
Kansl3	0.809624	5.51526	0.041016	0.951877
Gpr83_0	2.59877	-0.765975	0.0410623	0.951877
Ube4a	0.934253	6.44983	0.0410627	0.951877
Ctrc	2.64844	-4.70633	0.04109	0.951877
Ccdc91	-1.46922	1.1775	0.0411898	0.951877
Ccdc167	-1.03528	4.32128	0.0412326	0.951877
Zbtb18.2	3.05896	-2.16575	0.041242	0.951877
Rhoa_1	-0.950351	1.74708	0.0412569	0.951877
Ceacam6	1.34476	2.88684	0.0413071	0.951877
Abca5_1	1.00121	1.96259	0.0413554	0.951877
Fzd5	3.36841	-0.372441	0.041427	0.951877
Greb1	2.50473	-3.62615	0.041439	0.951877
Zswim7	-0.645124	4.67465	0.0415197	0.951877
NA	1.47935	-0.160262	0.0416068	0.951877
Arhgap6_1	0.933444	0.954026	0.041664	0.951877
Phf12_0	0.549627	5.47602	0.0417007	0.951877
Ccdc88a	-0.979437	2.45855	0.0417603	0.951877
Rps14	-0.720807	9.43115	0.0417673	0.951877
Sh2d4a	2.76656	-3.42874	0.0418299	0.951877
Nlgn3	2.9441	-3.63053	0.0420028	0.951877
Bora	-0.87286	2.19664	0.0420458	0.951877
Avd_1	-1.46889	9.53792	0.0420667	0.951877
Pa23	-2.35555	-5.09332	0.042094	0.951877
Ptprm	-2.35555	-5.09332	0.042094	0.951877
Asphd2	2.91102	-3.79907	0.042136	0.951877
Atp8a1	-0.933267	4.83995	0.0421943	0.951877
Pgbd5	-2.78289	-4.10225	0.0422413	0.951877
Panx1	-2.08642	-2.3859	0.0422898	0.951877
Znf513	0.625677	5.51409	0.0425178	0.951877
Drgx	2.36524	-4.32365	0.0425676	0.951877
Farsb	-1.01859	3.21588	0.0426316	0.951877
Unc80	3.40003	-1.57062	0.0426355	0.951877
NA	0.827759	6.37395	0.0426985	0.951877
Sh3kbp1	-1.08112	1.35253	0.0427455	0.951877
Znf574_0	3.23678	-1.69444	0.0431153	0.951877
Park7	-1.19588	3.24158	0.043166	0.951877
Dirc2	0.931487	4.21571	0.0432221	0.951877
Evi2a	-0.954278	1.75533	0.0432502	0.951877
Tnk2	1.5539	3.53618	0.0433215	0.951877
Fuk	0.78732	4.85525	0.0433462	0.951877
Scin_0	-2.96444	-1.38178	0.0433855	0.951877
Sestd1	-1.32711	0.303157	0.0435082	0.951877
Sema6b	2.80582	-3.84393	0.0435578	0.951877
Dnmt3b	2.91411	-4.04472	0.0435802	0.951877
Or4d2	2.56964	-3.58984	0.0436252	0.951877
Slc35a3	-1.14044	2.91409	0.0438458	0.951877
Smpdl3a	-1.49881	-0.577215	0.0438982	0.951877
Ddb_3	2.0082	-4.5026	0.0441674	0.951877
Abhd2	-0.927033	4.6908	0.0441991	0.951877
Sfxn1_0	2.62	-1.81049	0.0442187	0.951877
Pstpip1	-0.739889	2.45048	0.0442466	0.951877
Itpr3	0.932157	3.04331	0.0445331	0.951877
NA	-2.23358	-5.15374	0.0446193	0.951877
Kif16b	-0.909329	2.66548	0.0447746	0.951877
Ppef2	1.03787	1.34709	0.0449099	0.951877
Tfec	-1.57316	-0.209251	0.0451132	0.951877
Avd_4	-2.6796	4.91255	0.0451972	0.951877
Cecr2	1.15723	0.505441	0.045315	0.951877
Coq10ba	1.0803	5.51023	0.0453458	0.951877
Klhdc8a	1.30236	-0.114244	0.0454352	0.951877
NA	-0.682989	4.05015	0.0454908	0.951877
Ift27	-1.19024	0.590936	0.0457563	0.951877
Cga	2.30465	-4.88958	0.0459286	0.951877
Gale	0.895796	2.81615	0.0459426	0.951877
Hdac5	0.856742	2.59679	0.0461767	0.951877
Slc39a10_0	-1.02476	1.03475	0.0461857	0.951877
Bcat1	-1.44661	-0.553453	0.0462015	0.951877
Baiap2l1	-0.993144	4.2252	0.0462113	0.951877
Ppp2r2c	-2.40996	-5.06532	0.0464216	0.951877
Cd82_1	-0.76193	4.2542	0.0465142	0.951877
Rab30	-2.00585	-0.76205	0.0465441	0.951877
Cenpq	-1.27952	0.915121	0.0466453	0.951877
Znf608	-2.33079	-3.26912	0.0469229	0.951877
Miga1	-0.572191	4.11878	0.0469248	0.951877
Pard6g	-2.38837	-4.00868	0.0469309	0.951877
NA	-0.5172	6.424	0.0470537	0.951877
Fdps	0.683252	4.20236	0.0470966	0.951877
Pds5b	-1.04438	3.92725	0.0470969	0.951877
Rbm19	1.0125	4.25047	0.0471416	0.951877
Rin3	-0.983272	1.98656	0.0473028	0.951877
Srf	0.75941	6.34479	0.047591	0.951877
Sertm1	-1.66701	-1.91531	0.0475954	0.951877
Arx_2	2.9947	-3.99666	0.0479207	0.951877
Mapk8ip3	0.750051	4.75515	0.0479275	0.951877
Coq7	-1.00497	1.89116	0.0480606	0.951877
NA	0.487042	6.57833	0.0481731	0.951877
Agpat4	-2.02913	0.448043	0.0482142	0.951877
Vtcn1	-2.50304	-2.44872	0.0482939	0.951877
Rpl34	-0.762086	8.77732	0.0483648	0.951877
Hspa4	0.584705	7.84334	0.0484769	0.951877
Ptpn3	2.41845	-3.77142	0.0484873	0.951877
Ubqln4	0.872353	5.46676	0.0485335	0.951877
Cish	1.15783	8.72047	0.0485747	0.951877
Cyb5r3	-1.14553	4.15611	0.0486112	0.951877
NA	-3.95153	-4.29583	0.0486767	0.951877
Hapln2	2.70084	-3.90436	0.0486878	0.951877
NA	3.19384	-2.83337	0.0488011	0.951877
Samsn1	-0.816933	3.36293	0.0488863	0.951877
Ptk2b	1.35148	-0.343261	0.0489135	0.951877
Epabp	1.08346	0.614104	0.0490231	0.951877
Med31	-0.655162	4.81269	0.0490341	0.951877
Rpl30	-0.49034	7.35249	0.0491301	0.951877
Cep295_4	-1.11572	1.97494	0.0491755	0.951877
Dnah14	2.02729	-4.49508	0.0492784	0.951877
Zfand2b_1	0.562716	6.35629	0.049322	0.951877
Ca14	1.77718	-0.0302776	0.049333	0.951877
Parp6	2.83638	-2.2482	0.0493484	0.951877
Ackr4	-1.05761	8.2538	0.0494767	0.951877
Zyx	0.78996	3.05217	0.0495242	0.951877
Cacnb4	-5.12522	1.64796	0.0495431	0.951877
Dctn1_1	0.724849	4.2159	0.0496883	0.951877
Drd1c	1.04307	2.33255	0.0496999	0.951877
Npc1l1_1	2.25211	-4.37977	0.0497352	0.951877
Rufy3	-0.705115	2.54929	0.0497766	0.951877
Pola1	-1.24823	3.00964	0.0498217	0.951877
Qrfpr	-2.2517	-5.14623	0.0499204	0.951877
Fabp7	-2.2517	-5.14623	0.0499204	0.951877
Tcte1	2.2495	-3.60579	0.0499467	0.951877
Lmo7	2.68547	-2.2718	0.0499523	0.951877
Mrpl30	-0.667135	4.55115	0.050029	0.951877
NA	1.19053	2.56133	0.0500587	0.951877
Ift43	-2.32241	-5.11182	0.0501461	0.951877
Ppp1r16b	-2.20915	-3.44486	0.0501757	0.951877
Wdr59	0.512859	5.26295	0.0502182	0.951877
Faah_1	2.2063	-3.34719	0.0502296	0.951877
Aqp10	2.81805	-0.212909	0.0502442	0.951877
Lpar6_0	-0.931222	2.12614	0.0503097	0.951877
Ncs1	2.24089	-4.1425	0.0503181	0.951877
Il18	-1.36953	1.74046	0.0503331	0.951877
Casc3	0.725817	5.79914	0.0504232	0.951877
Pcgf2	1.9168	-1.27122	0.0504974	0.951877
Tmem63b	0.805726	2.86659	0.0505309	0.951877
Il10	-1.71206	-1.05885	0.0505318	0.951877
Gpi	-0.92015	2.04642	0.0505565	0.951877
Ccny	-1.51806	1.07314	0.0506234	0.951877
Ddx23_1	0.760377	5.39605	0.0508446	0.951877
Spout1	0.722877	3.93947	0.0509194	0.951877
NA	0.467014	6.60462	0.0509389	0.951877
Dusp15	1.2258	5.7794	0.051033	0.951877
Pwwp2b	0.7325	4.35363	0.0510746	0.951877
Ldb1	1.31151	6.44977	0.051122	0.951877
Stau1	-0.641329	3.43837	0.0511321	0.951877
Phkg1	-0.767497	4.20164	0.0511485	0.951877
Rnf103	-0.881596	3.76	0.0511565	0.951877
Tjp2	1.30247	3.13175	0.051215	0.951877
NA	0.480192	8.12179	0.0513384	0.951877
Pla2g4b	-2.07018	-5.23465	0.0513586	0.951877
Pcsk9	2.77123	-3.56681	0.0514427	0.951877
Bsx	1.63132	-1.056	0.0515746	0.951877
Usp31	0.488619	4.98005	0.0516891	0.951877
Marcks	-1.62502	0.430072	0.0518673	0.951877
Bcl2a1	-3.28612	-3.60143	0.052007	0.951877
Pxdn_0	1.11205	0.519248	0.0521929	0.951877
Atp8b3	1.39283	-0.173885	0.052219	0.951877
Rrp12	0.954668	4.30548	0.052284	0.951877
Trfe	-1.16108	5.33498	0.0523074	0.951877
Bcorl1	1.04405	4.98444	0.0523735	0.951877
Mnd1	-3.68352	-2.54306	0.0523903	0.951877
H2afy2	-2.76507	-3.74158	0.0524084	0.951877
NA	0.798115	6.59246	0.0524684	0.951877
Filip1	2.00996	-3.03246	0.0525425	0.951877
Ccdc50	-2.65676	-2.96452	0.0527615	0.951877
NA	-3.14175	-4.68804	0.0528449	0.951877
Srcrm	2.29958	-2.73496	0.053131	0.951877
Tbc1d22b	0.91964	4.03942	0.0532658	0.951877
Parp1	-1.02914	2.00884	0.0532686	0.951877
NA	1.07451	3.28541	0.0533158	0.951877
Btn1a1_3	0.898994	4.4501	0.0533521	0.951877
Slc35b2	0.689158	4.28451	0.0533585	0.951877
Map3k1	-0.645653	2.96684	0.0535659	0.951877
Npc1l1_0	2.01347	-4.5026	0.0535744	0.951877
Acot1_0	3.12157	-3.67178	0.0536023	0.951877
Wdr53	0.509365	4.68386	0.0536839	0.951877
Orc3	-0.537562	5.913	0.053729	0.951877
Cep128_2	-1.88223	0.347863	0.0538252	0.951877
Hcn4_0	1.72138	-2.11549	0.0539303	0.951877
NA	2.22802	-4.14594	0.0540189	0.951877
Hexim1	1.36329	5.25818	0.0541476	0.951877
Faf1	0.523873	5.12069	0.0541557	0.951877
Cdc20	0.985199	2.30966	0.0542309	0.951877
Kirrel1	1.12141	2.63845	0.054246	0.951877
Plch2	1.98926	-0.773331	0.0543292	0.951877
Sbf1_3	1.14061	1.61825	0.0543716	0.951877
Fam118a	-1.10419	1.70663	0.0545398	0.951877
Lgals3	-1.687	1.33185	0.0545547	0.951877
Tmem2_0	-0.76205	2.52837	0.0546232	0.951877
Znf277	-0.971366	0.691625	0.0547602	0.951877
Degs2	2.18625	-3.88586	0.0547629	0.951877
Afap1	-1.94645	-5.29508	0.0547945	0.951877
Gpr35_2	-2.55474	-3.07815	0.054906	0.951877
Glra4	3.20704	-3.26103	0.0549509	0.951877
Hnrnph1	0.534224	9.33353	0.0549976	0.951877
Kbtbd13	2.06643	-1.80988	0.0550454	0.951877
NA	2.10333	-4.45434	0.0550624	0.951877
Ndufaf1	-0.530646	4.56577	0.0551024	0.951877
Arhgef10	1.48242	1.16276	0.0552907	0.951877
Trappc13	-0.775207	5.43803	0.0555036	0.951877
Man2c1_0	0.755507	4.34557	0.0555184	0.951877
Psmb3	-0.557645	5.33293	0.0555495	0.951877
Smarcc2	0.93214	3.05544	0.0556657	0.951877
Shroom1_0	1.86584	-1.88381	0.055666	0.951877
Spred2	-0.876332	2.76214	0.0556861	0.951877
Pbld	2.42319	-2.13006	0.0557356	0.951877
Srd5a1	-2.36065	-4.02508	0.0558019	0.951877
Ndufa1	-0.793574	6.81474	0.0559346	0.951877
Gria3	2.15948	-4.18267	0.0560985	0.951877
Bnip3l_0	0.889422	2.30896	0.05636	0.951877
Pnpla6	0.711336	3.01382	0.0565254	0.951877
Adss	-1.06154	6.66708	0.0565422	0.951877
Cers2	0.607041	3.46606	0.0565997	0.951877
Tnfrsf25	2.14115	-2.15263	0.0567791	0.951877
Arhgap5	-0.915329	5.31429	0.0568094	0.951877
Jhy	2.43884	-2.42228	0.0568295	0.951877
NA	-0.885684	1.9627	0.05685	0.951877
Ptprc	-0.690734	5.77564	0.0568637	0.951877
Gpr37	-2.99082	-4.77769	0.0570418	0.951877
Zscan29_1	-2.0659	-5.23465	0.0570903	0.951877
Tm4sf1_1	-2.16307	-5.1864	0.0571958	0.951877
NA	2.32598	-3.12255	0.0572682	0.951877
Pik3cb_0	-1.69343	-1.19791	0.0572996	0.951877
Cybb	-1.49131	1.6968	0.0574412	0.951877
Glb1l2	-1.51075	-0.490233	0.0574652	0.951877
Echdc1	1.65209	-0.348833	0.0575143	0.951877
Ptpn14	2.282	-2.89287	0.0576721	0.951877
Ces5a	2.28505	-3.57813	0.0577731	0.951877
Rgs1	-2.02943	-0.823389	0.0577909	0.951877
Lag3	-2.93952	-4.79594	0.0578222	0.951877
Abcb6	0.91735	8.167	0.0579327	0.951877
Hibch	-1.03936	1.47802	0.0579855	0.951877
NA	-2.45856	-3.49135	0.0580227	0.951877
Wdr75	-0.519708	5.60546	0.0580564	0.951877
Wdyhv1	-0.777977	4.38011	0.0580718	0.951877
Cd247	-0.774798	1.66665	0.0582038	0.951877
Snx5	-0.506156	6.60306	0.0583321	0.951877
Cybrd1	-0.836796	3.88411	0.0583371	0.951877
Cldn19_0	-2.06215	-2.07065	0.0584211	0.951877
45179	-1.94414	-5.29508	0.0584269	0.951877
Ccna1	-1.94414	-5.29508	0.0584269	0.951877
Cxcl8_0	-1.94414	-5.29508	0.0584269	0.951877
Fhod1	0.622673	3.34909	0.0585056	0.951877
Spcs2	-0.58241	3.42157	0.0587	0.951877
Crkl	1.08217	2.12384	0.0588113	0.951877
Lif	1.88098	-5.09332	0.0589796	0.951877
Tnni3k	1.88098	-5.09332	0.0589796	0.951877
Pan2	1.34209	5.477	0.059053	0.951877
Fbxo31	0.568403	3.64959	0.0590581	0.951877
Smcr8	0.53155	5.11015	0.0590865	0.951877
Pam	-0.68125	2.67747	0.0590925	0.951877
Mocs3	-0.615522	5.32522	0.0592128	0.951877
Smpd3	-1.24839	-0.0472052	0.0592979	0.951877
Rab44_1	-2.79463	-3.48292	0.0593593	0.951877
Slc4a10_1	-0.975576	2.1713	0.0593921	0.951877
Fcgbp_0	2.37065	-3.79102	0.0594073	0.951877
Foxj2	0.626902	5.79348	0.0594371	0.951877
Flii	1.13413	5.68201	0.0596284	0.951877
Slc8a3	2.2886	-4.11561	0.0596925	0.951877
Tbc1d19	2.23581	-3.21423	0.059696	0.951877
Enp1	1.49165	0.767523	0.0597629	0.951877
Alcam	-2.75153	-4.88207	0.0598179	0.951877
Itga6	0.60782	4.47656	0.05994	0.951877
Kynu	-2.74602	2.06136	0.0601018	0.951877
Nsmf	2.42925	-3.76282	0.0602202	0.951877
Tnip1	0.705044	6.22016	0.0603968	0.951877
NA	1.26786	1.24509	0.0604709	0.951877
NA	0.787234	5.57042	0.0606289	0.951877
Axin1	0.499009	5.40938	0.060707	0.951877
NA	-2.90851	-4.80116	0.0607189	0.951877
Usp39_1	0.910475	3.88735	0.0607611	0.951877
NA	0.68302	4.36556	0.060767	0.951877
Nefl_0	2.05531	-5.0049	0.0607827	0.951877
Man1b1	-0.872602	4.80608	0.061067	0.951877
Pfdn4	-0.630003	6.08606	0.0610859	0.951877
Gpr35_0	-2.52158	-2.27849	0.061135	0.951877
Rpl14	-0.539111	10.2417	0.0612001	0.951877
NA	-1.19079	2.62254	0.0612027	0.951877
Kti12	-1.06815	1.17426	0.0613302	0.951877
Rpl7	-0.68492	10.2818	0.0613781	0.951877
Zfyve28_1	1.80004	-0.942943	0.0614817	0.951877
Abhd17a	0.808385	5.19092	0.0616103	0.951877
Itih3	1.9075	-2.71153	0.0616605	0.951877
Csrnp2_0	1.36189	1.88192	0.0617211	0.951877
Ilf3	0.815064	2.9925	0.0617684	0.951877
Mcph1	-1.13367	1.3343	0.061806	0.951877
Dhcr24	-2.25006	-1.3746	0.0618223	0.951877
Cpeb1	2.39559	-4.06364	0.061903	0.951877
Il2ra	-1.37403	-1.25236	0.0619033	0.951877
Lipo	1.63575	-1.67275	0.0619569	0.951877
NA	1.11335	4.7242	0.0619881	0.951877
Chd8	0.914879	2.12628	0.0620758	0.951877
Plac9	0.944498	0.510124	0.062083	0.951877
Rps15	-0.744783	9.6061	0.0621162	0.951877
Adra2	1.53846	0.654304	0.0621755	0.951877
Vps37c	0.70481	4.60032	0.0621834	0.951877
Dlgap4	-2.00955	-0.577407	0.0622078	0.951877
Cep126	2.12299	-4.97049	0.0622266	0.951877
Iqsec3	-1.86271	-2.80452	0.0622601	0.951877
NA	1.24568	3.45555	0.0623744	0.951877
NA	0.642293	5.11095	0.0625167	0.951877
Parn	-0.561402	4.61656	0.0626063	0.951877
Srrm3	1.35014	-0.294091	0.0626408	0.951877
Ogdhl	2.45159	-3.66186	0.0627277	0.951877
Dmbt1_10	2.28491	-4.11561	0.0628625	0.951877
Macf1_2	-1.62277	-0.177932	0.0628856	0.951877
Cars2	-1.16836	-0.00945636	0.0629726	0.951877
Prim1	1.08086	2.93313	0.0629759	0.951877
Nr4a3	2.35591	-2.49906	0.0631187	0.951877
Ccdc124a	1.19976	3.20189	0.0632412	0.951877
Cdadc1	-1.49622	0.67464	0.0633984	0.951877
Rhbg	1.59041	-1.19206	0.0634081	0.951877
Hm14a	-1.27182	1.99131	0.063435	0.951877
NA	-0.69966	1.90323	0.0634494	0.951877
Rgs21	-1.95487	-1.05295	0.0635185	0.951877
Apob	2.59616	-3.68002	0.0636337	0.951877
Myo18b	1.80477	1.5891	0.0636708	0.951877
Slc2a9_1	-2.14992	-3.19025	0.0637191	0.951877
Slirp	-0.562736	5.81216	0.0637328	0.951877
Nagpa	1.18387	2.08044	0.0637838	0.951877
Map1s	1.50322	-2.2496	0.0638155	0.951877
Gkap1	-2.05654	-1.95843	0.0640829	0.951877
Avd_3	2.98953	-2.99534	0.0640965	0.951877
NA	2.59682	-3.96676	0.0641081	0.951877
Lypd2_0	-3.01948	-3.55297	0.0642653	0.951877
Macc1	-1.78123	-5.37598	0.0643172	0.951877
Sik3_1	0.854028	3.12436	0.0643498	0.951877
Gng10	-1.49566	0.0486877	0.0643878	0.951877
Npas4_2	2.37529	-3.30841	0.0644113	0.951877
Sstr2	2.7439	-2.74655	0.0644695	0.951877
Casd1	-0.832524	3.91347	0.0644924	0.951877
Smad4_1	-2.76557	-3.02136	0.0645462	0.951877
Mindy4b_1	-2.08711	-3.6381	0.0647037	0.951877
Vps9d1	0.868708	3.99088	0.0647666	0.951877
Mmp2	-2.64704	-2.30508	0.0648229	0.951877
Rbm5	0.443647	8.6563	0.0648355	0.951877
Aif1l	-1.76325	-0.419969	0.0650389	0.951877
Ccr5	-1.39657	0.177807	0.065063	0.951877
Katnal1	2.29044	-3.31561	0.0651391	0.951877
Irf2bp2	0.646733	5.68432	0.06515	0.951877
Ephb2	2.23492	-4.91365	0.0651669	0.951877
Wasf2	0.639652	3.80874	0.0652459	0.951877
Tmem230	-0.740471	6.69752	0.0652482	0.951877
Mogs	0.726749	5.28461	0.0654254	0.951877
Pole3	-0.910848	3.08864	0.0654532	0.951877
Stxbp3	-1.16129	0.322263	0.0655843	0.951877
Agbl3	-1.2033	1.96432	0.0656423	0.951877
Mst1r	1.30111	-0.123953	0.0656764	0.951877
Fam89a	-2.11349	-0.977715	0.0657064	0.951877
Mpp4_0	-2.63287	-4.95331	0.0657718	0.951877
Ostf1	-0.909371	2.08516	0.0657922	0.951877
Gnrhr2	1.53129	-1.23249	0.0658072	0.951877
Atp12a	-1.64059	-1.84098	0.065967	0.951877
Coq4	1.04845	1.2293	0.0660271	0.951877
Sik3_0	0.700061	4.53065	0.066125	0.951877
Pdk3	-0.619526	7.09552	0.0661336	0.951877
Ccdc13	1.50413	-1.53578	0.066162	0.951877
Impact	-0.664054	3.57807	0.0661693	0.951877
Dnajc7	-0.635567	6.34569	0.0661824	0.951877
Mta2	0.881143	2.01738	0.0663518	0.951877
Arhgap35_0	0.940404	0.399671	0.0664191	0.951877
Msmb_1	-2.1183	2.06314	0.066435	0.951877
Gart	-0.814818	3.9603	0.0665645	0.951877
NA	1.07631	2.38778	0.0665989	0.951877
Nipal1	1.60181	-5.23465	0.0666244	0.951877
Dkk1	2.44319	-3.58598	0.0666794	0.951877
R3hdm2	0.4522	5.63907	0.0667134	0.951877
Naif1	0.564354	3.53871	0.0667464	0.951877
NA	-0.754869	1.7872	0.0668735	0.951877
Clrn2	2.27195	-3.84393	0.0669458	0.951877
Asah2	3.2464	-1.1092	0.066985	0.951877
A2ml1_1	2.37312	-3.90555	0.0670133	0.951877
Tango6	0.808534	3.73125	0.0670411	0.951877
Itga4	-1.32177	4.50218	0.067206	0.951877
Kif3a_1	-1.04481	1.50387	0.0672301	0.951877
Mettl6	-0.926704	2.26624	0.0672349	0.951877
P2ry12	-1.38777	-1.16301	0.0673872	0.951877
Pla2g15	-0.79847	1.28637	0.0674313	0.951877
Scg5	-2.2938	-3.80952	0.0675172	0.951877
Tlr5	-2.63586	-1.80606	0.0676082	0.951877
Thbs3	3.17504	-1.67802	0.0676765	0.951877
Prdx1	-0.674996	10.789	0.0676943	0.951877
NA	2.77945	-3.8592	0.0677006	0.951877
Ahcyl1	0.879349	2.35156	0.067738	0.951877
Psmg4	-1.50734	-1.77841	0.0677547	0.951877
Clasrp	0.820855	6.03151	0.0678158	0.951877
Olig2	2.05717	-4.47658	0.0678374	0.951877
Tmem167a	-0.767691	3.81177	0.0678555	0.951877
Fkbp14	-1.0076	3.68542	0.0679192	0.951877
St8sia4	-1.20749	1.68297	0.0680152	0.951877
Elovl7	-2.22045	-0.112855	0.0681361	0.951877
Slc7a1	-0.879424	1.42104	0.06816	0.951877
Begain	2.12366	-2.19776	0.0682261	0.951877
Wasf3	-1.94425	-3.99278	0.0683419	0.951877
Elmo1	-0.869355	1.99171	0.0684211	0.951877
Pmch	-1.84937	-2.79947	0.068455	0.951877
Req	0.74359	2.39213	0.068539	0.951877
Sh3bp2	-0.89559	1.39521	0.0685464	0.951877
Pcyt2	0.539976	5.52924	0.0685856	0.951877
Cherp	0.540049	5.89407	0.068642	0.951877
Dnase2b	-1.32832	1.7325	0.0687715	0.951877
Erich1	-1.00497	1.5128	0.0687821	0.951877
Fancb	-1.73099	0.257592	0.0688402	0.951877
Abraxas1	-1.35114	4.67869	0.0688437	0.951877
Znf526_1	0.917241	1.17935	0.0688498	0.951877
Prtfdc1	-3.30891	-1.63281	0.0689361	0.951877
Plbb	1.1631	1.85188	0.0689365	0.951877
Slc25a5	2.37893	-2.72302	0.068976	0.951877
Clec16a	-0.679607	4.46209	0.0690668	0.951877
Esr1	-2.79146	-4.35789	0.0690874	0.951877
Ikbip	-0.58703	4.12504	0.0690959	0.951877
NA	-2.04373	-4.46067	0.0692648	0.951877
Mle	0.749523	4.65957	0.0692851	0.951877
NA	0.535683	6.99622	0.0693997	0.951877
Fbxo3	-0.648215	8.91383	0.0695056	0.951877
Slc8a1	-2.1379	-2.65706	0.0696824	0.951877
Slail	0.906098	1.71941	0.0697043	0.951877
Rhobtb2	1.43757	0.937882	0.0699492	0.951877
Kif3a_0	-0.852128	1.257	0.0699665	0.951877
Haus3_0	-0.743554	3.58006	0.0699922	0.951877
Kcnab1_1	2.64426	-2.67719	0.0700398	0.951877
Mars2	0.877867	4.96085	0.0700658	0.951877
Cep295_5	-0.909569	2.14796	0.0700937	0.951877
Hspa9	0.505487	6.51458	0.0701285	0.951877
Uggt1	-0.575093	6.47597	0.0701933	0.951877
Sdcbp2	1.39353	-0.957693	0.0702236	0.951877
Cyp27c1	-1.4809	0.701691	0.0703329	0.951877
Tacr3	-2.73305	-3.29303	0.0703388	0.951877
Il1r1_1	-1.6623	-0.15801	0.0704169	0.951877
Coq3	-0.60904	4.00703	0.07043	0.951877
Il5ra	-3.2252	-3.21423	0.0704488	0.951877
45173	-2.21452	-5.15374	0.0704942	0.951877
Kcnab1_0	3.2999	-3.30125	0.0705423	0.951877
Arap3	1.46717	0.590153	0.0707486	0.951877
Adcy6_0	1.56931	-0.868537	0.0708274	0.951877
Erbb2_0	2.39585	-2.4664	0.0709226	0.951877
Gc	1.68981	-1.25312	0.0712777	0.951877
Fgf16	1.75306	-1.99549	0.0713088	0.951877
NA	0.637268	5.54412	0.0713123	0.951877
Ldhb	-1.04755	1.85518	0.0714288	0.951877
Papolg	-1.99069	-0.0742654	0.0716146	0.951877
Uqcrh	-0.721419	6.967	0.0716227	0.951877
Adamts15	2.43459	-4.81197	0.071687	0.951877
Krt14	-1.78678	-2.40402	0.0717001	0.951877
Nmes1	-0.976982	6.29394	0.0717479	0.951877
Slf2	-0.87405	6.42144	0.0718645	0.951877
Dapk3_1	0.919421	5.72673	0.0720677	0.951877
A2m_0	1.21627	2.52362	0.0722686	0.951877
Eva1c_1	1.43701	-2.42787	0.0723762	0.951877
Mcoln1	0.541628	4.03757	0.0724124	0.951877
Vcam1	-3.31	-4.63494	0.0724407	0.951877
Efhc2	-1.95642	-1.51177	0.0724669	0.951877
Fasn	-0.629511	2.93825	0.0725588	0.951877
Lyg_0	-2.34098	1.82698	0.0725743	0.951877
Ptgfr	-2.31694	-4.17604	0.072581	0.951877
Znf777_1	1.22373	0.26306	0.0726137	0.951877
Gak	1.76248	-1.99964	0.072738	0.951877
Znf865_0	1.84098	-0.937575	0.0728006	0.951877
Ntng2	2.46608	-4.79594	0.0728155	0.951877
Cyth2	1.5418	-2.20326	0.072817	0.951877
Taldo1	-0.56261	5.07455	0.0728863	0.951877
Cog1	0.648107	5.63742	0.0729482	0.951877
Atxn1l	0.452341	4.67118	0.073227	0.951877
Bend3	-2.69933	-2.44587	0.0733826	0.951877
NA	0.845689	5.37271	0.0734048	0.951877
Gsdma3	-1.08806	0.599559	0.0735347	0.951877
Snrk_0	2.70317	-2.13999	0.0735601	0.951877
Kmo	-1.8222	-5.35748	0.0735847	0.951877
Npnt	2.64672	-2.402	0.0736644	0.951877
Palld_1	-2.0739	-5.23465	0.0737197	0.951877
Cd200_2	2.31624	-2.34229	0.0737825	0.951877
Cyth3	-1.55687	-2.58356	0.0737881	0.951877
Pomp	-0.541525	6.73454	0.0738945	0.951877
Pdp2	-0.816304	1.32501	0.0739134	0.951877
Ppat	-1.23205	0.113243	0.0739846	0.951877
Klf4_0	1.38822	7.98834	0.0740163	0.951877
Cep76	-0.71336	4.4539	0.074075	0.951877
Tbc1d20	0.496172	5.246	0.0741488	0.951877
Lrrc4b	1.576	-1.49614	0.074249	0.951877
Malrd1_4	-2.94981	-4.76676	0.0742551	0.951877
Rala	-0.650056	4.14161	0.0744396	0.951877
Pard3b	0.921295	1.29885	0.0744538	0.951877
Cetn1	-1.13875	0.458558	0.0744766	0.951877
Fabp3	-0.975821	2.81181	0.074516	0.951877
Coasy	1.11498	2.9352	0.074521	0.951877
Mafa	1.33793	-1.93679	0.0746641	0.951877
Lgr4	-1.25754	-0.165274	0.0747961	0.951877
Myo15a	-2.95511	-2.54148	0.0748601	0.951877
Lrrc31	-1.45184	-1.22924	0.0749105	0.951877
Aes	1.2476	-0.044619	0.0753355	0.951877
Znf3_2	2.40867	-0.0991933	0.0754628	0.951877
Mgme1	-0.718976	2.65218	0.0754884	0.951877
D2hgdh	0.631126	3.48692	0.0756032	0.951877
Rps17	-0.539203	10.3883	0.0756122	0.951877
Numb	1.14407	0.826167	0.075733	0.951877
Cep135	-0.824775	3.19269	0.0757893	0.951877
Rnf157	2.82163	-3.82911	0.0758496	0.951877
Syt11	0.514242	3.85205	0.0758826	0.951877
Gpr1	2.1058	-1.37566	0.0758962	0.951877
Serpine1	1.38066	1.74108	0.0759326	0.951877
Dscc1	-1.36835	0.841143	0.0759958	0.951877
Pde6d	-0.701414	2.76379	0.0760904	0.951877
Dnaja4	0.872045	7.61781	0.0761135	0.951877
Xkrx	1.46362	-0.0882009	0.0762608	0.951877
Rbm45	-0.832335	1.75518	0.0765776	0.951877
NA	1.03282	0.314891	0.0766268	0.951877
Tinagl1	1.37023	3.43735	0.0768204	0.951877
Aspn	-2.44918	-2.36867	0.076879	0.951877
Cdo1	1.02213	0.616695	0.0769325	0.951877
Asb14	-1.69875	-5.4179	0.0769485	0.951877
Myoz3	1.59588	-1.33664	0.0770223	0.951877
Preb	0.753523	4.79145	0.0770519	0.951877
Vps41	-0.588184	5.67378	0.0771823	0.951877
Grid2ip	2.38821	-3.52858	0.0771894	0.951877
Clptm1	0.794325	5.24738	0.0772112	0.951877
Pnpla2_1	-1.69623	-1.30169	0.0775218	0.951877
Fam160b2	1.10619	2.69492	0.0775882	0.951877
B4galt3_1	0.855294	3.58619	0.0776614	0.951877
Amz1	2.19371	-4.00868	0.0777184	0.951877
Wipf2	0.647275	3.70542	0.0778767	0.951877
Slc24a4	-1.55092	-1.87537	0.0779119	0.951877
Apaf1	-0.832016	4.86508	0.077931	0.951877
Gch1	-1.13011	2.34797	0.0781359	0.951877
Tpi1	-0.65352	3.87571	0.0781366	0.951877
NA	-0.706471	1.58964	0.0783186	0.951877
Ddias	-0.652267	2.11884	0.0783714	0.951877
Mccc2_0	1.42267	0.692888	0.078385	0.951877
B4galt5	2.38631	-4.85197	0.0786712	0.951877
Nfrkb	0.56424	5.5302	0.078728	0.951877
Prcc	0.851353	5.30659	0.0788246	0.951877
Ipo5	-0.53787	5.65095	0.078854	0.951877
Pgghg	1.49992	-2.36902	0.0788695	0.951877
Gstt1_0	-1.60701	-2.65652	0.0788741	0.951877
Wdr37	-0.864493	5.72076	0.0790107	0.951877
Mgat4b_1	-1.24859	5.03824	0.0790281	0.951877
NA	0.947563	4.44522	0.0790434	0.951877
Crybb2	2.22093	-2.60031	0.0791768	0.951877
Gpd1l	-0.567852	3.68878	0.0793732	0.951877
Osbpl6	3.10328	-4.48732	0.0794365	0.951877
Med16	0.707429	6.29153	0.0794784	0.951877
Vwa5b1_1	2.9984	-4.53525	0.0794865	0.951877
Gramd1c	-1.29764	-0.911588	0.0796314	0.951877
Dntt	-1.59065	-0.559365	0.0796388	0.951877
NA	-2.62156	0.247893	0.0797186	0.951877
Ptpn6	-0.641289	4.22966	0.0797701	0.951877
Trp53inp1	-0.621707	4.78652	0.0798021	0.951877
Lrrc58	1.4111	2.56394	0.079812	0.951877
NA	0.796932	2.89028	0.079825	0.951877
Fam110d	1.61543	-0.288402	0.0799358	0.951877
Tmem54_1	2.54856	-3.54298	0.0800626	0.951877
Gstk1	-1.15723	3.00056	0.0800628	0.951877
Neb_3	1.73521	-4.11561	0.0801942	0.951877
Polrmt	0.753576	4.16446	0.0803848	0.951877
Pym1	0.658027	3.47756	0.0803955	0.951877
Tfg	0.777249	4.0898	0.08058	0.951877
Pth4	2.00176	-3.10555	0.0806037	0.951877
Zo20_1	2.64378	-2.1928	0.0807496	0.951877
Tmem214	1.12601	1.95522	0.0808478	0.951877
Pik3c2b_0	2.35387	-2.43684	0.0808497	0.951877
Ripk2	-2.6756	-2.26896	0.0808562	0.951877
Pon2	-0.600708	6.36198	0.0809526	0.951877
Myo10_4	0.746651	3.42586	0.0809834	0.951877
Timeless_1	1.15672	1.14255	0.0810388	0.951877
Tifa	-2.25965	-2.96903	0.0811345	0.951877
Ppm1g	0.686296	3.67191	0.081143	0.951877
Huwe1_0	2.20752	-1.83962	0.0811536	0.951877
Glrx2	-0.508665	4.1353	0.0811579	0.951877
Prkg2	1.77549	-3.43795	0.0812939	0.951877
Znf346	0.568146	4.07592	0.0813904	0.951877
Ahsa2	0.654059	3.88816	0.0813965	0.951877
Znf668_1	1.45063	1.69457	0.0814106	0.951877
Cuedc1	0.451043	5.71383	0.0814385	0.951877
Met	2.00685	-2.02418	0.0814711	0.951877
NA	1.93306	-2.93486	0.0814903	0.951877
Rnf43	2.08035	-3.93666	0.0815139	0.951877
Mrps18c	-0.509736	5.73366	0.0815832	0.951877
Smtn_0	1.42422	-0.229683	0.0816417	0.951877
Dyrk2	-1.32657	0.229477	0.0816495	0.951877
Pcsk4	3.18648	-3.64771	0.0817101	0.951877
Exoc3l1	0.64444	4.37054	0.0817533	0.951877
Anpep	3.22806	-3.07656	0.0817574	0.951877
Psmc3ip	0.601525	3.067	0.0817714	0.951877
Trmt12	0.681124	4.97295	0.0818277	0.951877
Ppp1r18	1.59047	2.75046	0.0819599	0.951877
NA	-0.588123	7.06451	0.0819715	0.951877
NA	-2.63323	-3.89337	0.0819794	0.951877
Csf2ra_1	-1.48842	0.371702	0.0819866	0.951877
NA	-2.88386	-2.99962	0.0819958	0.951877
Slc26a5	-0.952719	3.01509	0.0820987	0.951877
Cavin2	-1.44638	-0.751073	0.0822757	0.951877
Spns3	-1.07329	0.111806	0.0822919	0.951877
Nif3l1	0.70127	4.03429	0.0824501	0.951877
Deptor	2.38768	-1.38952	0.0824822	0.951877
Sec63	-0.813249	3.795	0.0824901	0.951877
Abca1_3	2.96763	-4.54966	0.0825191	0.951877
Slc29a4	1.80274	-1.25413	0.0825212	0.951877
Vldlr	-1.96232	-1.85868	0.0825289	0.951877
Mfsd4b	0.530494	4.3613	0.0825329	0.951877
Slc23a3	0.7535	2.51428	0.0826574	0.951877
Fam20c_0	1.17299	-0.620199	0.0826889	0.951877
Arhgef17	2.09995	-2.67888	0.0827017	0.951877
NA	-0.917747	1.80265	0.0827943	0.951877
Fgd4_1	-1.06557	-0.541911	0.0827985	0.951877
Tpte2	2.48952	-4.79941	0.0828244	0.951877
Itk	-1.18516	-0.48874	0.0828637	0.951877
Wdr55	0.99825	3.8091	0.0829621	0.951877
Lhfpl2	0.691035	2.54288	0.0829812	0.951877
Ctsc	-0.860425	2.33079	0.0830411	0.951877
Caps2	2.40535	-4.05518	0.0830943	0.951877
Psmb7	-0.450926	6.73736	0.0831741	0.951877
Rb1cc1	-0.59771	7.16708	0.083205	0.951877
NA	-0.747104	3.50952	0.0832839	0.951877
Vps11	0.600038	7.46299	0.0833797	0.951877
Cachd1	2.66214	2.51028	0.0833954	0.951877
Myot	2.25487	-4.91648	0.0834139	0.951877
Lrr1	-1.02188	3.0384	0.0834429	0.951877
Znf2	1.96421	0.0100336	0.0834585	0.951877
Msto1_0	0.673359	3.18225	0.0835614	0.951877
Meis1_0	0.844735	1.49447	0.0837105	0.951877
Psmd2	0.785387	7.26038	0.0837148	0.951877
Chtop	0.504111	6.948	0.08374	0.951877
Ttll3	1.05727	2.01539	0.0837619	0.951877
Adcy6_2	1.42529	0.254907	0.0838063	0.951877
Pex16	0.492089	5.33418	0.0838362	0.951877
Capza2	-0.614012	6.64458	0.0838924	0.951877
NA	0.605385	4.80508	0.0840626	0.951877
Ass1	-1.71841	1.02656	0.0841779	0.951877
Ttll4	0.468674	4.39698	0.0842737	0.951877
Dnajc5_2	1.26428	0.87643	0.0842899	0.951877
Capn7	-0.549495	4.98975	0.0842975	0.951877
Cdk3	1.07069	0.764991	0.084414	0.951877
Hspa4l	0.51111	8.61042	0.0845152	0.951877
Plcl2_1	-0.814566	1.34635	0.0846395	0.951877
Cry2_0	0.751318	3.52469	0.0847489	0.951877
Esd	-0.604161	4.96503	0.084888	0.951877
Lamc3	3.0382	-2.78344	0.0849074	0.951877
NA	-1.3098	1.80198	0.084993	0.951877
Tnip2	-1.02466	0.306085	0.0849996	0.951877
NA	0.855813	0.888634	0.0850883	0.951877
Dct	3.1054	-2.71773	0.0851518	0.951877
Akap8	0.406357	5.82718	0.0854553	0.951877
Tmem158	-2.30233	-2.68052	0.0854778	0.951877
Hs6st1	-2.17092	-3.32671	0.0855088	0.951877
Fgl2	-1.05225	5.29813	0.0855198	0.951877
Ppp2r3b	-0.939264	0.927781	0.0856502	0.951877
Stx2	-0.66667	3.47792	0.085654	0.951877
Plekhm1	1.90201	-0.368839	0.0856553	0.951877
Crlf2	-2.70714	-4.88958	0.0856712	0.951877
Ccdc181	0.814078	0.879613	0.0856873	0.951877
Hpgds	-1.35724	2.17706	0.0858165	0.951877
Slc32a1_1	3.21425	-4.4163	0.0858394	0.951877
Kctd18	-1.0038	0.709794	0.0858631	0.951877
Itih4	2.52347	-3.47807	0.0861372	0.951877
Dcps	0.55813	4.1274	0.0861438	0.951877
Ahnak	1.02308	2.01741	0.0862419	0.951877
Tppp	-1.00857	0.478619	0.0864056	0.951877
Tnfaip8l3	1.85908	-3.09521	0.0864779	0.951877
Otoa	1.97965	-4.11561	0.0865774	0.951877
NA	2.17411	-4.95664	0.086762	0.951877
Gpsm1	1.65026	-3.49887	0.0868075	0.951877
NA	-2.31898	-2.97717	0.086915	0.951877
Slc39a8	-1.64663	0.126227	0.0869169	0.951877
Eef1d	-0.528336	9.28608	0.0869212	0.951877
Clk2	0.512468	6.19458	0.0873411	0.951877
Pdyn	2.81065	-4.62798	0.0873452	0.951877
NA	2.31779	-2.96014	0.0873989	0.951877
Fastkd5	0.505345	5.69491	0.0874609	0.951877
Ecd	0.826854	5.42126	0.0874751	0.951877
Msantd2	0.648265	2.71883	0.0875353	0.951877
Stk38l	-0.708563	1.2871	0.0876702	0.951877
Eef2	0.730652	10.0201	0.0879082	0.951877
Gpr34	-2.42101	-1.63147	0.0880002	0.951877
Me3	-2.31425	-5.09332	0.0880723	0.951877
Rps12	-0.668903	8.74111	0.0881617	0.951877
Otor	1.66987	-2.17955	0.0881812	0.951877
Dbi_1	-0.760374	3.00001	0.0881843	0.951877
Fastk	0.633751	4.58252	0.0881892	0.951877
Cd3e	-1.61479	1.23151	0.0882053	0.951877
Wfdc3	-1.43816	0.668319	0.088209	0.951877
Cox20	-0.818476	3.06209	0.0882264	0.951877
Sod2	-0.572887	6.2302	0.088271	0.951877
Frmpd3	2.28533	-3.83294	0.0884289	0.951877
Kcns2	2.59685	-4.73666	0.0887581	0.951877
Cplx2	1.68377	-0.842	0.0889107	0.951877
Nr1i3	2.00569	-2.4054	0.0890528	0.951877
Prmt7	-0.593415	5.0227	0.0891265	0.951877
Noct	0.643378	2.61533	0.0892725	0.951877
Gtf3c2	0.502431	4.87406	0.0893495	0.951877
Rpl18a	-0.467954	8.519	0.0893879	0.951877
Ndc80	-0.945608	2.56952	0.0894245	0.951877
Arid1a_1	0.540691	3.20998	0.0895327	0.951877
Cpa1_0	2.54946	-4.76073	0.0895638	0.951877
Bcl10	-0.495892	4.28571	0.0895656	0.951877
Emilin1	2.27201	-2.74198	0.0895848	0.951877
Nek6	-0.69385	4.16087	0.0896505	0.951877
Pdxk	-0.94315	1.83875	0.089768	0.951877
Fgd3	-0.624259	3.80821	0.0898192	0.951877
Tmem171	-3.01899	-3.0789	0.0899038	0.951877
Mrvi1	2.31747	-1.63135	0.0899043	0.951877
NA	1.11712	3.35362	0.0899797	0.951877
Rgs10	-1.20725	1.79118	0.0900497	0.951877
Vdr	-1.80746	-1.73766	0.0902904	0.951877
Dek	-0.997375	4.56522	0.0903102	0.951877
Col2a1_1	3.00602	-4.5211	0.0903792	0.951877
Tppp3	-2.35069	1.00464	0.0904424	0.951877
Ube2o	0.495452	5.79091	0.0904721	0.951877
Cnot6	-0.775332	5.47786	0.0905726	0.951877
Sp2	0.829218	4.02699	0.0905812	0.951877
Mid1ip1	0.997139	2.44391	0.0906959	0.951877
Tnnc2	-2.00289	-3.14418	0.0906986	0.951877
NA	2.80386	-4.63057	0.0909704	0.951877
Myocd	2.25767	-1.70842	0.0909843	0.951877
Ecsit	0.707644	3.60239	0.0910497	0.951877
Fam131a	2.29459	-3.20812	0.0910544	0.951877
Fam196b	-2.27916	-2.46157	0.09113	0.951877
NA	-0.890937	1.25427	0.0912037	0.951877
Fstl5	-2.04641	-5.23465	0.0912088	0.951877
Rrp36	0.526028	5.21133	0.0912974	0.951877
Epn3	1.2861	2.9768	0.091471	0.951877
Prkab2	0.737192	4.94944	0.0915098	0.951877
Lrrc32	0.515093	3.26833	0.0915119	0.951877
Vps4a_1	0.568807	5.29491	0.0915331	0.951877
Ophn1	0.432386	5.83878	0.0915605	0.951877
Arl3_0	-0.527547	5.41942	0.0915858	0.951877
Atp2a3	0.73548	4.23222	0.0916048	0.951877
Znf142	0.472313	4.76879	0.0917178	0.951877
Atp11c	-0.734323	3.40165	0.0917653	0.951877
Lipe_0	1.88623	-1.5922	0.0918277	0.951877
Ankrd52	0.584409	4.5957	0.0918581	0.951877
Dcun1d2	-0.622232	8.94239	0.0919111	0.951877
Birc7b	-2.20731	-2.10808	0.0919165	0.951877
Ecm2	2.23525	-2.66704	0.0919201	0.951877
Ints5_2	1.38631	0.00980038	0.0919876	0.951877
NA	2.26848	-2.94814	0.0920739	0.951877
Il6	1.44773	-1.10721	0.0921597	0.951877
Egr3	-1.92835	-5.29508	0.0921983	0.951877
Or4m1	2.07702	-5.0049	0.0922583	0.951877
Snrnp200	0.85664	4.0174	0.0923679	0.951877
Emp1	-2.77765	-3.66732	0.0923685	0.951877
Ptgfrn	2.3299	-3.30753	0.0924871	0.951877
Rnf145_1	1.442	2.40701	0.0925658	0.951877
Slc25a10	-0.610384	3.97353	0.092639	0.951877
Tbcc	0.642101	6.50069	0.0927763	0.951877
Myo9a_1	-2.31532	-5.11182	0.0927964	0.951877
Sub1_0	-0.550349	5.43825	0.0928113	0.951877
Prdx4	-0.578024	6.12827	0.0929682	0.951877
Foxo3_0	0.652221	7.90932	0.0929919	0.951877
Pex3	-0.464749	4.96863	0.0930363	0.951877
Cpa2	3.06155	-4.49214	0.0931369	0.951877
Mettl4	-0.573448	5.43485	0.0931683	0.951877
Tmem35b	1.82515	-0.278845	0.0932406	0.951877
Prom1a_0	1.42886	1.28321	0.0933119	0.951877
Gba_4	1.58221	0.437097	0.0933721	0.951877
Chia	-2.19957	-3.15077	0.0935057	0.951877
Jak2	-0.587793	10.6895	0.0936072	0.951877
Ppan_0	0.952383	3.58156	0.0936666	0.951877
Smarcd2	0.803115	3.97096	0.0937163	0.951877
Chn1	-1.50148	-3.14418	0.0939305	0.951877
Ern1_1	0.962705	1.62641	0.0939953	0.951877
Sphk1	0.980084	6.02226	0.0941394	0.951877
Lrrc43	2.12344	-1.78307	0.094174	0.951877
Mrps18a	-0.698849	4.45284	0.0942679	0.951877
Samd12	2.07526	-5.0049	0.0943461	0.951877
NA	2.07526	-5.0049	0.0943461	0.951877
Sowahd	-0.980436	0.16982	0.094583	0.951877
NA	0.733612	2.52623	0.0947481	0.951877
Cr2_2	2.36958	-4.85197	0.0947523	0.951877
Akap17b	2.22689	-1.45926	0.0948347	0.951877
Opsp_0	-2.29488	-3.95292	0.0948469	0.951877
Mdm1	0.554385	3.94495	0.0950006	0.951877
Coa4	-0.774566	4.94945	0.0950156	0.951877
Specc1	-0.838458	1.18377	0.0950377	0.951877
Mpv17l2	0.90922	2.01186	0.0950948	0.951877
Tbc1d23	-0.56203	6.81031	0.0952333	0.951877
Dtx1	2.99294	-4.52666	0.095417	0.951877
Mgll	-1.64665	-1.25583	0.0954891	0.951877
Esam	1.15991	0.230417	0.0955529	0.951877
Shoc2	-0.487817	5.03524	0.0955928	0.951877
Tns	-1.43938	-0.249295	0.0956733	0.951877
Nrcam_0	-2.21534	-5.14623	0.0957063	0.951877
Timm13a	-0.526165	3.47875	0.0957677	0.951877
Trappc4	0.586792	6.34223	0.0958349	0.951877
Hrh2_1	-1.53123	-5.49881	0.0958923	0.951877
Oscp1	-0.499922	3.26146	0.0959007	0.951877
Slc26a6	1.06334	-0.856347	0.0959276	0.951877
Pitrm1	-0.782429	5.9799	0.0959448	0.951877
Rnaseh2b	-1.23871	6.58084	0.0959727	0.951877
Znf423	1.96999	-3.1361	0.0959761	0.951877
Ece2	1.09345	2.88387	0.0960497	0.951877
Nsmce1	-1.01528	2.50167	0.0962144	0.951877
Arid1b	-0.65614	4.06821	0.0962735	0.951877
Pfkl	1.25039	-1.48096	0.0963834	0.951877
Dnajb1	0.735592	4.32376	0.0964223	0.951877
Gpr162	2.82674	-4.61791	0.0964448	0.951877
NA	-0.897713	2.47792	0.09647	0.951877
M1ap	1.81358	-2.45238	0.0965022	0.951877
Trerf1_0	-0.899084	0.674136	0.0965043	0.951877
Map1b_1	1.61571	-1.50856	0.0965574	0.951877
Casp7	-1.66668	3.39482	0.0965713	0.951877
Gsto1	-0.812165	7.66901	0.0965754	0.951877
N4bp2l2	-0.624059	2.97553	0.0966132	0.951877
NA	2.26876	-2.90893	0.0966447	0.951877
Lekr1	-2.07707	-0.3227	0.0966456	0.951877
Slc16a7_1	-1.76967	-5.37598	0.0966878	0.951877
Brf2	0.512988	3.43787	0.0968503	0.951877
Etfrf1	-0.546998	4.53717	0.0968874	0.951877
Tfip11	0.420601	6.12985	0.0969624	0.951877
Alkbh5	0.409569	6.53983	0.0970807	0.951877
Dctn1_0	0.620651	2.76512	0.0972232	0.951877
Enpp5	-0.737136	5.89221	0.0972319	0.951877
Lamb1_1	1.99443	-5.04506	0.0972953	0.951877
Gatm	1.99443	-5.04506	0.0972953	0.951877
Slc4a4_0	-0.942914	-0.09558	0.0973213	0.951877
Wdr93_1	2.30868	-4.88207	0.0973535	0.951877
Evc	-2.6502	-3.47228	0.0975504	0.951877
NA	2.92601	-1.7676	0.0975505	0.951877
Znf22_2	2.50519	-0.629394	0.0975607	0.951877
Arx_0	2.92162	-4.56966	0.0976626	0.951877
Mxd3	0.898401	2.48805	0.097733	0.951877
Pheta2	1.24072	0.323298	0.097745	0.951877
Tmem189	-0.879289	4.7831	0.0977742	0.951877
Mettl27	2.17457	-2.9408	0.0980761	0.951877
Zranb3	-0.498038	3.32211	0.0980928	0.951877
Wif1	2.93953	-4.5534	0.098256	0.951877
Pkd1	1.51443	-0.764433	0.0982914	0.951877
Rtraf	-0.485332	5.76199	0.0982924	0.951877
Fra10ac1	-0.576804	6.16241	0.0983396	0.951877
Cyp2j6_0	2.73927	-4.65808	0.0983632	0.951877
Galm	-1.47509	-0.737303	0.0984277	0.951877
	-0.764684	1.95227	0.098454	0.951877
Jund	0.747391	6.2631	0.0985211	0.951877
NA	0.739479	5.91711	0.0985713	0.951877
Aldh5a1	-0.650276	2.54627	0.0986988	0.951877
Man2c1_1	1.09446	1.03966	0.0987001	0.951877
Gucd1	-0.428951	5.14946	0.0989599	0.951877
Tent5a_1	-1.11607	0.676077	0.0990323	0.951877
	2.4657	-3.73418	0.0991459	0.951877
Glb1_1	-0.817615	2.90546	0.0991871	0.951877
Ripply2	1.76265	-1.31438	0.0993469	0.951877
Rrn3	-0.495886	6.77435	0.0993999	0.951877
Malrd1_0	-2.44349	-5.04506	0.0996	0.951877
Sh3gl3	-1.09726	3.77005	0.0996641	0.951877
Scrt2	1.22348	-1.18054	0.0997018	0.951877
Fam189b_0	2.10708	-1.05967	0.0997719	0.951877
Acads	0.488687	4.46099	0.099853	0.951877
Heph	1.20041	5.87732	0.0998656	0.951877
Ccnc	-1.14226	2.75405	0.10011	0.951877
Tfap2e	2.41083	-2.95793	0.100312	0.951877
Ctbs	-1.23123	0.899396	0.100339	0.951877
Wdr19	-0.668565	2.69858	0.100417	0.951877
Psma7	-0.54642	7.00257	0.100438	0.951877
Chdh	-0.820448	0.388094	0.100452	0.951877
Znf668_0	1.34947	1.24865	0.100496	0.951877
Ccdc83	1.74879	-3.85145	0.100524	0.951877
Apoc3	2.1212	-2.83028	0.100583	0.951877
Tnik_2	0.672384	3.96204	0.100843	0.951877
Myb	-1.66465	2.27455	0.10087	0.951877
Sox21	-2.47359	-1.75308	0.100872	0.951877
NA	-1.25069	-1.02111	0.101073	0.951877
Tbc1d2	0.685241	2.40742	0.101093	0.951877
Ptbp3	-1.27647	2.33829	0.101127	0.951877
Pou3f1a	2.58021	-4.73666	0.10121	0.951877
Znf282_1	2.58021	-4.73666	0.10121	0.951877
Grk4	-0.676571	2.4668	0.101277	0.951877
Lrp8_0	2.53804	-4.76372	0.101279	0.951877
Ctnnd1	0.962263	4.45507	0.101345	0.951877
Klhl30	1.88545	0.207087	0.101365	0.951877
Dusp6	-1.16534	-1.03137	0.10148	0.951877
Nmb	2.14854	-3.90226	0.101741	0.951877
Plau	-1.33988	1.11506	0.101849	0.951877
Ttc26	-0.525144	3.09523	0.10185	0.951877
Ift22	-0.692437	2.11274	0.101857	0.951877
NA	1.95541	-5.06532	0.101958	0.951877
Slc29a1	1.16075	7.47675	0.101998	0.951877
Vps50	-0.77949	3.98289	0.102014	0.951877
Gzma_1	-3.20345	-1.1746	0.102198	0.951877
Atp6v0e1	-0.424033	6.55833	0.102229	0.951877
St6galnac4	0.679931	1.80296	0.102258	0.951877
Eda	1.85883	-3.81384	0.102279	0.951877
Hgd	0.801112	3.04438	0.102321	0.951877
Fbxo42	0.593728	5.08687	0.102392	0.951877
Slc46a3	-0.483322	8.22811	0.102511	0.951877
Tbx6l	1.87624	-2.84096	0.1026	0.951877
Fdxr	0.850392	2.84148	0.102639	0.951877
Gpatch2	-0.796857	3.05398	0.102717	0.951877
Camta1_0	0.658729	1.67975	0.102745	0.951877
Pdcd6	-0.512341	5.97354	0.102797	0.951877
Pappa2	2.60247	-4.72483	0.102838	0.951877
Zc3h12b	-2.64705	-2.31182	0.102889	0.951877
Slc20a1	0.618831	9.06393	0.102906	0.951877
NA	-2.27457	-3.6561	0.102987	0.951877
Tram1l1_1	-0.863677	4.2817	0.103017	0.951877
G0s2	-0.718705	0.75096	0.103045	0.951877
Homer3	0.779323	5.89713	0.103095	0.951877
Dnajb9	-0.635355	5.56116	0.103144	0.951877
Odr4	-0.571962	5.27126	0.103269	0.951877
Sirt7	0.703911	2.82609	0.103281	0.951877
Sri	0.782603	4.60311	0.103311	0.951877
Tjp3	1.0482	3.05884	0.103603	0.951877
Fastkd2	-0.687459	5.38949	0.103637	0.951877
P2rx5	1.17134	-0.135708	0.103664	0.951877
Adra2c_1	2.53875	-4.75924	0.103775	0.951877
Atp11a	-0.727091	2.01104	0.103777	0.951877
Camkv	2.48085	-4.78747	0.103872	0.951877
Reck	1.09858	-0.897008	0.104014	0.951877
Polr1c	0.414391	6.46317	0.104109	0.951877
Mfap3l	1.5371	1.33495	0.104124	0.951877
Glb1_0	0.87973	2.11909	0.104231	0.951877
Cep295_3	-0.808992	2.75522	0.104286	0.951877
Cdc42bpa	-1.67553	1.6078	0.104368	0.951877
Sema7a	0.533898	3.02421	0.104438	0.951877
Nrg3	2.49892	-4.77929	0.104591	0.951877
NA	-1.4317	-3.08529	0.104641	0.951877
Uqcr11	-0.613162	5.86308	0.104695	0.951877
Bcar3	1.00966	0.358962	0.104709	0.951877
Asx_2	0.450321	5.04606	0.104796	0.951877
Cd3d	-1.44764	1.6835	0.10489	0.951877
NA	2.56503	-3.67469	0.104992	0.951877
Myo9a_0	-1.90494	-4.00693	0.105115	0.951877
Yipf5	-0.375114	5.95648	0.105285	0.951877
Zc3h10	0.851414	3.74606	0.105301	0.951877
Hars_1	0.534022	3.9858	0.105327	0.951877
Slc45a3	1.33098	-0.212655	0.105506	0.951877
Sgk3	-0.650166	5.27637	0.10551	0.951877
Ank2	3.22225	-4.40895	0.10554	0.951877
Ift20	-0.41551	7.28832	0.105558	0.951877
Slc4a3	-0.789467	1.66145	0.105604	0.951877
Isoc1	-2.44922	-3.81384	0.105712	0.951877
Cgn	1.06686	0.172203	0.105733	0.951877
Atp13a3	-0.660268	5.51282	0.105741	0.951877
Zfpm1	1.15917	3.85452	0.10576	0.951877
Alas1	0.509207	4.03518	0.105773	0.951877
Polr2c	0.42834	6.40744	0.105781	0.951877
Lgalsl	-0.780187	2.21786	0.105856	0.951877
Ftcd	1.95255	-5.06532	0.105884	0.951877
Il12b	1.95255	-5.06532	0.105884	0.951877
Scamp3	0.965944	4.34378	0.105987	0.951877
Cplx4	1.5352	-1.76138	0.105987	0.951877
Rpl31	-0.566367	8.81894	0.105995	0.951877
NA	0.901495	0.203556	0.106018	0.951877
Mdh1	-0.475949	3.62203	0.106053	0.951877
Bap1	0.415002	6.31919	0.106055	0.951877
Znf526_0	0.720662	1.11533	0.106067	0.951877
Cpd_0	0.947463	2.85663	0.106091	0.951877
Myof_1	-2.39728	-1.54263	0.106112	0.951877
Smap1	-0.797224	1.61219	0.106173	0.951877
Cdk10	0.639796	5.5843	0.106229	0.951877
Crydash_0	2.1581	-4.95664	0.106261	0.951877
Dach1	-1.28969	-1.61677	0.106274	0.951877
Usp19	0.549604	5.29339	0.106309	0.951877
Ankrd33	2.13408	-4.97049	0.106343	0.951877
NA	0.864603	1.50049	0.106559	0.951877
Ltbp2	0.476296	4.24562	0.106844	0.951877
Skap2	-0.720018	1.94019	0.106964	0.951877
Ldhd_0	2.5342	-4.75924	0.107003	0.951877
Capn1	0.898593	2.61787	0.107068	0.951877
Cyr61	2.09066	-2.56238	0.107147	0.951877
Zbed1	-1.53311	-1.43838	0.107177	0.951877
Nckap5l	2.70915	-2.53453	0.107215	0.951877
NA	3.30425	-2.48911	0.107271	0.951877
Mtfp1	1.05497	1.56113	0.107343	0.951877
Agr2	-1.80344	0.567856	0.107379	0.951877
Hmgb3	-2.15245	2.29212	0.107418	0.951877
NA	-0.415522	5.04362	0.107425	0.951877
Grap2	-1.72714	-1.4413	0.107568	0.951877
Srpk2	-1.01695	-1.03217	0.107664	0.951877
Srd5a3	-1.50225	0.205503	0.107762	0.951877
Znf362_1	2.02638	-3.96676	0.107815	0.951877
Rida	-0.856662	4.15082	0.107817	0.951877
Gatad2b	0.730132	3.32351	0.107844	0.951877
NA	-0.424211	5.72182	0.107844	0.951877
Rasgrp1	-0.603345	1.8104	0.107861	0.951877
Nup210	-1.70787	6.37413	0.107867	0.951877
Apool	-0.517254	2.98797	0.108004	0.951877
Commd8	-0.627821	4.51788	0.10805	0.951877
Apba3	0.681801	5.18001	0.108088	0.951877
Pstpip2	-0.656425	1.6724	0.108119	0.951877
Hspa8	0.809164	9.97126	0.108161	0.951877
Fat4	2.45213	-4.80116	0.108188	0.951877
Nr5a2	2.45213	-4.80116	0.108188	0.951877
Naa30	0.443958	6.28319	0.108363	0.951877
Xpo4	-0.655668	2.49803	0.108469	0.951877
Des	2.45998	-4.79941	0.108515	0.951877
Col5a1_0	2.45998	-4.79941	0.108515	0.951877
Cubn	1.04057	2.66465	0.108546	0.951877
NA	1.61935	-2.19783	0.108606	0.951877
Rps15a	-0.644427	9.29533	0.108717	0.951877
Psmc1	0.442739	5.65102	0.108743	0.951877
Ric8a	0.547912	3.01527	0.108944	0.951877
A1at2_0	2.35406	-4.85197	0.109028	0.951877
Rest_1	1.32268	-2.77762	0.109041	0.951877
Slc2a1	0.918046	4.54484	0.109159	0.951877
Cadps2	2.40482	-4.82523	0.10918	0.951877
N4bp3	1.57569	-0.528759	0.10927	0.951877
Clmn	-2.0347	-5.23465	0.109368	0.951877
Zbtb8a_1	-1.28009	0.127219	0.109451	0.951877
NA	1.60451	-1.27078	0.109591	0.951877
Zc3h12a	-0.64424	2.11701	0.10961	0.951877
Rbpms	2.30063	-4.88958	0.109634	0.951877
Krt12	2.06446	-5.0049	0.109656	0.951877
Erbb2_1	2.06446	-5.0049	0.109656	0.951877
Wbp11	0.572909	5.31002	0.109942	0.951877
Wee2	2.37047	-4.84766	0.11002	0.951877
Cyp4f22	2.37047	-4.84766	0.11002	0.951877
Slc27a3_2	2.40698	-4.82915	0.110041	0.951877
Sema3g	2.49698	-2.96628	0.110071	0.951877
Pcyox1	-1.28997	-0.37471	0.110083	0.951877
Gmip	-0.734272	1.87922	0.11009	0.951877
P3h1	0.672874	4.09172	0.110252	0.951877
Snx20	-0.691789	1.60358	0.110275	0.951877
Ints5_1	1.62534	0.981712	0.110292	0.951877
Dcst2	3.13295	-4.45393	0.110299	0.951877
Asx_0	-1.719	-1.14877	0.110313	0.951877
Cntnap5	2.35231	-4.85197	0.110543	0.951877
Letmd1	0.929026	0.800206	0.11058	0.951877
C5ar1	0.863538	2.12435	0.110643	0.951877
Epm2a	-0.558668	3.02318	0.110654	0.951877
Arhgap6_0	0.786751	2.70217	0.110703	0.951877
Itgb6	2.24055	-4.91365	0.110716	0.951877
Elp4	-0.773126	1.08349	0.110734	0.951877
Spred1	-1.83042	-1.7064	0.110778	0.951877
Rpl7l1	0.380261	6.66919	0.111061	0.951877
Trappc9_0	-1.08451	-1.05175	0.111085	0.951877
Rdh7	1.01847	-0.795682	0.111095	0.951877
Pttg1	-1.07605	5.17651	0.111303	0.951877
Dse	0.814432	4.39548	0.11154	0.951877
Chkb	0.674217	2.7904	0.111567	0.951877
Plxnb1	2.21131	-0.678183	0.111603	0.951877
NA	-1.1225	1.51564	0.111723	0.951877
Cd274_0	-1.18184	3.16776	0.111736	0.951877
Ankrd13a_0	-0.648965	5.12199	0.111821	0.951877
NA	-0.464487	4.39921	0.111825	0.951877
Ap5s1	0.763512	2.80033	0.111882	0.951877
Lrrc41	0.392066	4.69028	0.111897	0.951877
NA	-0.636092	2.30734	0.111996	0.951877
Dctn5	-0.50642	4.30934	0.112004	0.951877
NA	-0.834589	1.90511	0.112028	0.951877
Ptpn23	0.605771	2.42825	0.112088	0.951877
Tsnare1_2	2.29258	-1.51908	0.112205	0.951877
Lrpap1	-1.24546	1.17995	0.112221	0.951877
Kcnq2	2.58494	-4.73265	0.112259	0.951877
NA	1.01898	-1.15777	0.112281	0.951877
Adamts14	2.66371	-4.69248	0.11242	0.951877
Il17rd	2.29342	-4.88207	0.112431	0.951877
Zfp2	0.988983	1.95819	0.112472	0.951877
Chrd_1	2.1285	-4.97049	0.112555	0.951877
Mrpl35	-0.561423	4.58167	0.112596	0.951877
Polg	0.481197	4.70122	0.112656	0.951877
Fkbp10	2.43342	-3.33298	0.112677	0.951877
Eda2r	-1.85864	-3.74452	0.112707	0.951877
Ednrb_1	1.02501	1.59351	0.112887	0.951877
Dchs1	2.95449	-1.97433	0.112975	0.951877
Nfe2l1	0.560203	4.21316	0.113051	0.951877
Snx29	-0.542362	5.74508	0.113149	0.951877
Amp2	-2.87715	2.96463	0.113188	0.951877
Man2b1	0.935834	1.72843	0.113199	0.951877
Tbx3	2.41507	-4.81946	0.113238	0.951877
Bhlhe23	2.27538	-4.89214	0.113352	0.951877
Mymk	2.27538	-4.89214	0.113352	0.951877
L3mbtl2	-0.44322	4.20672	0.113479	0.951877
Irf6	-2.14916	-3.87834	0.114001	0.951877
Gpr22	-1.16456	-0.0196421	0.114097	0.951877
Ints5_0	1.63191	0.854886	0.114239	0.951877
Znf572	2.06059	-5.0049	0.114397	0.951877
Lhpp	2.03853	-1.38896	0.114399	0.951877
Man2b2	-0.64078	2.27158	0.114485	0.951877
Ints1	0.43241	6.91917	0.114504	0.951877
Trappc3l	1.85717	-4.05518	0.11451	0.951877
Smpd1	0.655307	4.23379	0.114622	0.951877
Mavs	0.572042	4.05289	0.114829	0.951877
Spidr_1	-0.606341	1.76657	0.114877	0.951877
Prom2	2.02404	-3.96091	0.114907	0.951877
Cldn1	-2.29194	-3.21876	0.114931	0.951877
Arsb	-0.691919	2.49484	0.115001	0.951877
Cpne8	-2.31117	-2.50462	0.115004	0.951877
Kcnq4	2.28469	-2.87762	0.115033	0.951877
Ccdc77	0.513084	2.87541	0.115142	0.951877
Sspo_0	2.22598	-4.91648	0.11516	0.951877
Gpr174_2	1.56636	0.596123	0.115174	0.951877
Anxa13	-1.52778	-5.49881	0.115214	0.951877
Sertad4_1	-1.52778	-5.49881	0.115214	0.951877
Trabd2b_1	-1.52778	-5.49881	0.115214	0.951877
Rpl13	-0.675962	9.79482	0.1153	0.951877
Sparc	3.8272	-4.08704	0.115316	0.951877
Grip2	1.63737	-4.44217	0.11534	0.951877
Mpl	0.868643	5.67729	0.11536	0.951877
Chst4	1.78074	-3.98842	0.115389	0.951877
Ntan1	-0.535221	5.47359	0.115522	0.951877
Polr2h	0.430349	4.48523	0.115582	0.951877
Rab40b	-0.721947	1.4672	0.115705	0.951877
Fmnl1_0	1.20275	0.76049	0.115801	0.951877
Mfsd11	-0.530067	4.96847	0.115816	0.951877
Dtx4	0.702006	1.71445	0.115864	0.951877
NA	1.83928	-3.64771	0.116111	0.951877
Prpf3	0.36951	6.27611	0.116137	0.951877
NA	-2.05755	-0.278809	0.116173	0.951877
Smc4	-0.50421	5.09947	0.116178	0.951877
Uba1	0.905911	2.15388	0.116276	0.951877
Farsa_2	0.622023	3.28885	0.116288	0.951877
Med6	-0.488232	5.71116	0.116313	0.951877
Ggct	-0.571002	3.26068	0.116322	0.951877
Pqlc1	0.820869	0.726739	0.116397	0.951877
Tusc2	0.608599	3.06729	0.116538	0.951877
Nol4l	-1.3539	-2.42853	0.11657	0.951877
NA	0.739562	5.72743	0.116594	0.951877
Gcnt2	-1.48259	-1.79016	0.116627	0.951877
Pdgfc	0.789138	0.912869	0.116675	0.951877
Pkp3	3.03087	-4.50515	0.116676	0.951877
Siglec1_0	-2.53564	-2.79736	0.116723	0.951877
Kbp_0	-0.446548	7.09701	0.116736	0.951877
Cd6	-2.41004	-3.64168	0.116813	0.951877
Tpp1	0.993888	6.69346	0.116934	0.951877
Clcn5	0.436536	6.50734	0.117238	0.951877
Pgrmc1	-0.833049	2.18926	0.117293	0.951877
Ctdspl2b	1.98131	-5.04506	0.117364	0.951877
NA	1.14089	0.740722	0.117409	0.951877
Fuca2	-0.856541	4.97716	0.117463	0.951877
Fopnl	-0.71204	4.3298	0.11749	0.951877
NA	1.40687	-2.04365	0.117494	0.951877
Cystm1	-0.776446	2.24997	0.117567	0.951877
Ank1	0.799309	10.7441	0.117623	0.951877
Arfgap3	-0.859504	3.481	0.11764	0.951877
Vars2	1.74018	-3.33335	0.117657	0.951877
Tldc1	-0.948053	2.35298	0.1177	0.951877
Tgfa	1.61575	-4.45434	0.117705	0.951877
Clic3	0.830156	2.23008	0.117856	0.951877
Trabd2a_1	1.9237	-5.08173	0.117888	0.951877
Bdh2	-2.16213	-1.93713	0.117966	0.951877
Tbx1	2.65084	-2.52494	0.118044	0.951877
NA	0.458481	5.91633	0.11816	0.951877
NA	1.69298	-3.06152	0.118166	0.951877
Rpl37a	-0.480919	9.30474	0.118201	0.951877
Fryl	-0.719875	10.7879	0.118268	0.951877
Scrn2	1.43931	-0.904154	0.118341	0.951877
Nrarp	1.55907	3.13767	0.118361	0.951877
Depdc7_0	-1.21198	1.80935	0.118362	0.951877
Tmem119	0.923982	1.12892	0.118432	0.951877
Aldh1a3	-0.775342	1.70986	0.118575	0.951877
Lmf1	1.59335	-2.31852	0.118579	0.951877
Tsen2	-0.688487	3.30098	0.118618	0.951877
Rab3ip	-1.00876	-0.747024	0.118679	0.951877
Arhgap22	1.88798	-3.85576	0.118687	0.951877
Ctss	-1.13839	1.38415	0.118703	0.951877
44987	0.747543	5.89782	0.118741	0.951877
Ensa	0.554948	3.26526	0.118743	0.951877
Commd1	-0.816026	5.76673	0.11882	0.951877
Mfap1	0.722745	3.86816	0.118914	0.951877
Cox7a2	-0.788786	6.3764	0.118933	0.951877
Id2	0.739589	5.29761	0.11906	0.951877
Sp5	2.14685	-4.95664	0.119289	0.951877
NA	-0.451217	5.32025	0.119383	0.951877
Tmem204	1.96365	-3.51527	0.119542	0.951877
Comt	-1.07949	7.62897	0.119595	0.951877
Vwde_3	4.66102	-3.18029	0.119644	0.951877
Trim2	-1.30977	5.61634	0.119673	0.951877
Dchs2_0	-1.75967	-5.37598	0.119702	0.951877
Rnf216	-0.981215	0.0233315	0.119781	0.951877
Prmt9	-0.442346	4.01781	0.119888	0.951877
Tal1	0.576376	7.64558	0.119913	0.951877
Lcp1	-0.662658	5.11958	0.120043	0.951877
Ryr3_0	-2.10421	-5.20455	0.120052	0.951877
Serpine2	-0.471008	6.856	0.120255	0.951877
Nacc1	1.203	-0.198952	0.120303	0.951877
Fgb	2.51602	-4.79082	0.120337	0.951877
Cisd1	-0.50201	5.12054	0.120377	0.951877
Kcnk5	-1.33164	4.41793	0.1206	0.951877
Csf1r	-1.10574	2.91318	0.120636	0.951877
Pnpla2_0	-2.23387	-2.25679	0.120804	0.951877
Anxa4	-0.789387	1.21048	0.120892	0.951877
Slc5a11	2.45993	-4.79594	0.120911	0.951877
Tmem255b	0.745449	0.776061	0.120923	0.951877
Sbk1_0	2.42844	-4.81197	0.120964	0.951877
Fam171a1	-2.03628	-2.75802	0.121053	0.951877
NA	-0.446212	5.96493	0.121159	0.951877
Satb1	-0.650376	1.71441	0.121201	0.951877
Xrcc5	-0.652446	5.56034	0.121221	0.951877
Fam193b	0.842735	4.92736	0.121279	0.951877
Ppp6c	0.650102	3.80224	0.121318	0.951877
Znf398	1.31818	1.1436	0.121384	0.951877
Tmem59l	1.79257	-5.14623	0.121396	0.951877
NA	1.79257	-5.14623	0.121396	0.951877
Ldlrap1_1	1.79257	-5.14623	0.121396	0.951877
Adamts12	1.6928	-3.48451	0.121428	0.951877
Fem1a	0.55974	7.44515	0.121481	0.951877
Swap70	-0.75372	2.34321	0.121573	0.951877
Pepd	-0.853686	0.449422	0.12162	0.951877
Gpr12_1	2.31915	-4.86771	0.121658	0.951877
Sox14	2.31915	-4.86771	0.121658	0.951877
Cdk12	0.530336	4.83566	0.121782	0.951877
Dera	-0.735511	1.0128	0.121925	0.951877
Crtap	-1.39099	2.85314	0.122138	0.951877
Rho	2.27639	-4.88958	0.122174	0.951877
Aqp8	2.27639	-4.88958	0.122174	0.951877
NA	2.27639	-4.88958	0.122174	0.951877
Adam24	2.29407	-2.19566	0.122252	0.951877
Tlr4	-0.739365	1.65534	0.122286	0.951877
Itpripl1_2	1.2571	-1.07855	0.12229	0.951877
Adra1b	-1.70491	-4.88958	0.122312	0.951877
Hes6_1	0.832474	2.20165	0.122329	0.951877
Hmx3	2.12049	-4.97049	0.122364	0.951877
NA	2.08769	-3.56486	0.122454	0.951877
Fbxw5	0.569845	5.00561	0.122455	0.951877
Nectin3	-2.48441	-1.05635	0.122467	0.951877
Ctc1_0	-0.789681	0.741895	0.122473	0.951877
Rammet	-0.467805	4.68592	0.122478	0.951877
NA	0.903213	0.216713	0.122482	0.951877
NA	0.879792	4.49944	0.122548	0.951877
Sult2a1	2.07777	-0.85893	0.122553	0.951877
Ptprs	2.17569	-2.7757	0.122564	0.951877
Rgs17	-1.28454	-5.62164	0.122671	0.951877
NA	-1.28454	-5.62164	0.122671	0.951877
Stab2_0	-1.51825	1.4496	0.122688	0.951877
NA	1.65354	-5.21417	0.122693	0.951877
Atf3	-0.92694	1.36377	0.122813	0.951877
Cdca2	-0.821953	1.56137	0.122839	0.951877
Sdad1	-0.959328	1.53509	0.122936	0.951877
L3mbtl1_0	1.87893	-3.11536	0.12297	0.951877
Ch25h	-1.58797	-0.00251403	0.123003	0.951877
NA	0.652149	0.933387	0.123075	0.951877
Tacc3_0	-0.618895	7.13636	0.123171	0.951877
Gtf2b	-0.382394	5.64583	0.123178	0.951877
G6pc3	0.7566	1.22963	0.12341	0.951877
Rnf114	-0.448978	6.61042	0.123668	0.951877
Edar	1.86379	-5.10549	0.123773	0.951877
Eif3b	0.470399	6.67524	0.123788	0.951877
Bglap_0	2.20922	-4.92814	0.123875	0.951877
Eloa	-1.68046	-4.64393	0.124038	0.951877
Lrrn2	2.17667	-4.94039	0.12412	0.951877
Dbh	2.17667	-4.94039	0.12412	0.951877
NA	2.44305	-3.24736	0.124243	0.951877
Trim63	2.8362	-4.60355	0.124296	0.951877
Naa60	0.605601	2.94869	0.124445	0.951877
Sipa1l3_0	0.691008	2.39635	0.124462	0.951877
Mpeg1	-2.25596	-1.82482	0.124515	0.951877
Naaa	-0.667953	1.49946	0.124515	0.951877
Tnfsf13b	-0.768381	1.4035	0.124567	0.951877
Rpl36a	-0.563486	9.54839	0.124569	0.951877
Supt6h	0.574521	7.17871	0.124571	0.951877
Trim39_2	-2.05832	-3.87216	0.124594	0.951877
Ehmt1	0.841412	0.941194	0.12461	0.951877
Rftn2	-1.0837	-0.239791	0.124618	0.951877
Il4r	-1.73593	-0.64691	0.12486	0.951877
Mgat1	0.699581	4.66977	0.124874	0.951877
Npm1	-0.833355	5.66202	0.124935	0.951877
Ssr1	-0.63521	3.33921	0.124983	0.951877
Syt9_0	2.02014	-5.03092	0.125048	0.951877
Thg1l	-0.458153	3.53275	0.12511	0.951877
Dnajb2	0.549808	6.95831	0.12513	0.951877
NA	-1.24961	1.9917	0.125133	0.951877
Igsf9b	2.88796	-4.57717	0.125137	0.951877
Bco1	-0.967298	1.36425	0.12515	0.951877
Sqstm1	0.491361	9.13068	0.125297	0.951877
Lsm3	-0.639621	4.08238	0.125342	0.951877
Atxn7	0.777198	6.88684	0.125376	0.951877
Cgrrf1	0.448358	5.36671	0.125408	0.951877
Slc6a4_1	2.1281	-4.19651	0.125414	0.951877
Rtn4rl2	1.32025	-4.84766	0.125458	0.951877
Nuak2	2.91186	-4.56499	0.125547	0.951877
Dap3	0.515828	5.19773	0.125593	0.951877
Veph1	2.41309	-3.01647	0.125602	0.951877
Pdzrn3	2.05213	-5.0049	0.125656	0.951877
Fam19a2_1	2.05213	-5.0049	0.125656	0.951877
Aadac	2.05213	-5.0049	0.125656	0.951877
Hoxd10	1.91808	-5.08173	0.125793	0.951877
Ska2	-0.677587	3.3151	0.12595	0.951877
Phlda2	1.53462	-3.80495	0.12596	0.951877
NA	-1.31722	0.179431	0.125964	0.951877
Grb10	-2.23149	-3.04851	0.126064	0.951877
Tapt1	-0.655732	7.77168	0.126153	0.951877
Fkbp4	1.09121	5.34735	0.126194	0.951877
Wdr60	-1.29178	-1.24894	0.12622	0.951877
Ckap2	-2.01049	1.6652	0.126333	0.951877
Chrnb2_1	0.921371	2.4757	0.126434	0.951877
Mertk	2.2286	-1.22953	0.126479	0.951877
Sox12	-2.25453	-3.717	0.126596	0.951877
Klhl8	0.937357	2.39795	0.126712	0.951877
Cmss1	-0.974475	-0.391248	0.126779	0.951877
Mapkapk5	0.378071	5.3378	0.126844	0.951877
Dclre1c	-0.769092	2.81904	0.126984	0.951877
Homer2	2.64399	-2.8728	0.12704	0.951877
Hspg2_1	-1.82759	-4.82915	0.127084	0.951877
Frmd7	0.902921	-0.583562	0.127225	0.951877
Jun	0.614172	4.57375	0.127233	0.951877
NA	-0.767068	2.72785	0.127247	0.951877
NA	-1.60657	-2.64728	0.127287	0.951877
Ak1	0.91126	0.877569	0.127309	0.951877
Ilk	0.903577	5.21049	0.127314	0.951877
Mterf2	0.687788	0.526497	0.127326	0.951877
Trpm8	2.12869	-3.72892	0.127709	0.951877
Gsn	0.647809	5.39055	0.127709	0.951877
NA	0.634071	2.40956	0.127863	0.951877
Aar2	-0.707627	2.10826	0.127926	0.951877
Hrg	1.66798	-4.43058	0.128033	0.951877
Vps37d	0.949035	-0.103081	0.12817	0.951877
Gdpd1_0	-0.833174	-0.272094	0.128221	0.951877
Rhcg	2.05003	-5.0049	0.128287	0.951877
Mdga1	2.05003	-5.0049	0.128287	0.951877
Tcf15	2.05003	-5.0049	0.128287	0.951877
Grid1_0	1.78857	-5.14623	0.128385	0.951877
Ola1	-0.571081	3.41372	0.128399	0.951877
Ndor1	0.521296	3.64417	0.128449	0.951877
Rcan3	-1.39853	-1.34169	0.128588	0.951877
NA	-2.06352	0.0181683	0.128706	0.951877
Znf687	1.13634	1.34517	0.128785	0.951877
Ccnl1_0	0.502509	7.09441	0.128833	0.951877
Poc1a	-0.540302	2.31036	0.128839	0.951877
Nme9	0.61652	1.8943	0.129035	0.951877
Tsnaxip1	0.45232	3.0515	0.129213	0.951877
NA	1.91579	-4.01283	0.129276	0.951877
Ddx1	-0.431735	7.56066	0.129293	0.951877
Tmem52b	1.8085	-3.97683	0.129311	0.951877
Pheta1	0.744432	2.65813	0.129379	0.951877
Mlrn	-0.387605	7.38688	0.12946	0.951877
Kbtbd3	-0.769784	0.263273	0.129792	0.951877
Myh7	1.21171	-0.863304	0.129882	0.951877
Slc7a9_0	-2.36279	-2.15598	0.129912	0.951877
Tspan6	1.06211	0.874402	0.129985	0.951877
Ahdc1	2.44293	-2.47026	0.13007	0.951877
Lipg	0.90409	0.130757	0.130121	0.951877
Uba2	-0.492308	4.25644	0.130134	0.951877
Dmap1	0.925645	6.6166	0.13021	0.951877
Mrpl46	-0.445867	3.94743	0.130226	0.951877
Akr1d1	-1.88205	0.082013	0.130243	0.951877
Aplf	-0.503422	5.66982	0.130277	0.951877
Aff3_2	1.78502	-4.37225	0.130342	0.951877
Cnksr2_0	-1.22801	0.24599	0.130474	0.951877
Isca1	-0.419717	8.73006	0.130482	0.951877
Sec24c	0.386097	5.9459	0.13049	0.951877
Togaram1	0.548424	1.78706	0.130511	0.951877
A33_0	0.786286	6.76836	0.130527	0.951877
Clrn1	1.85942	-5.10549	0.130712	0.951877
Kif20b	-0.836152	3.29214	0.130773	0.951877
Ano8_0	1.43486	-1.17772	0.130776	0.951877
Zmym3	0.480803	3.45974	0.130833	0.951877
Mlxipl	2.29454	-2.04906	0.130927	0.951877
Hsf4	2.23671	-4.39982	0.130992	0.951877
Il10ra	2.45488	-1.70836	0.131026	0.951877
Tmem45b_0	1.61336	-5.23465	0.131065	0.951877
NA	1.61336	-5.23465	0.131065	0.951877
Dtwd1	-0.543884	2.41394	0.131074	0.951877
Abca5_3	1.66639	-3.02465	0.131205	0.951877
Mgea5_1	-2.49011	-3.45694	0.131351	0.951877
Coa1	0.602142	3.68776	0.1314	0.951877
Rbm8a	0.639603	3.20042	0.131405	0.951877
Exoc3l4_1	1.76634	-5.15374	0.131429	0.951877
Rundc1	0.641037	4.83996	0.131685	0.951877
Myl9	0.709434	2.84573	0.131771	0.951877
Uba3	-0.419025	6.29245	0.131859	0.951877
Nicn1	0.582369	5.10806	0.131917	0.951877
Itpripl2	0.78108	1.73327	0.132234	0.951877
Sema4a	1.65068	-0.113382	0.132267	0.951877
Camta1_1	1.19417	-0.858739	0.132287	0.951877
Mic13	-0.686673	3.66351	0.132297	0.951877
Cdkn1b	0.392772	6.35841	0.132525	0.951877
Akap13_0	-0.444066	3.55142	0.132573	0.951877
Mrpl48	-0.468843	4.21096	0.132645	0.951877
Zdhhc21	-1.1686	-0.475931	0.132719	0.951877
Ddx54	0.864792	4.62242	0.132731	0.951877
Mettl22	-1.5981	0.389899	0.132738	0.951877
Zc2hc1b	1.28316	-1.75599	0.132861	0.951877
St3gal2_0	0.892899	0.192457	0.132935	0.951877
Rnf44	0.741093	1.27846	0.132947	0.951877
Btn1a1_0	-0.604921	3.23222	0.132956	0.951877
Pmepa1	0.736441	0.941532	0.133006	0.951877
Pdgfrb	1.7004	-3.24885	0.133236	0.951877
Agps_1	-0.608573	1.33587	0.133257	0.951877
Caprin2	-0.985993	-1.64299	0.133278	0.951877
Tnfsf11	-2.5318	-3.21752	0.133548	0.951877
Aak1	0.490541	4.73443	0.133581	0.951877
Fam81b	2.42474	-2.07634	0.133597	0.951877
Mrpl34	-0.60974	5.35072	0.133925	0.951877
Lamb1_0	2.67128	-2.70294	0.133964	0.951877
Ssrp1	0.588764	7.28429	0.134	0.951877
NA	-1.10426	0.827041	0.134121	0.951877
Tmem128	-0.782673	0.784644	0.134124	0.951877
NA	2.33969	-4.85636	0.134377	0.951877
Emid1	1.65632	-4.15002	0.134385	0.951877
Grin2b	2.42314	-4.81382	0.134607	0.951877
Ambp	2.23864	-4.90809	0.13461	0.951877
Pop4	-0.379146	5.46193	0.134644	0.951877
Eng	1.59642	1.6957	0.134651	0.951877
Dpagt1	0.466004	4.66593	0.134746	0.951877
Wnt6	2.19926	-4.92814	0.134935	0.951877
Adamts17	2.19926	-4.92814	0.134935	0.951877
Xpo7	0.415605	4.84091	0.135008	0.951877
Ndel1	0.507182	6.43582	0.135082	0.951877
Fam214a	0.698949	8.78073	0.135087	0.951877
Nfatc2	0.711442	0.682687	0.13512	0.951877
NA	0.59346	2.81173	0.135152	0.951877
Rab11fip2	-0.91479	-0.13793	0.135173	0.951877
Sh3bp1	-1.4829	-1.98362	0.135234	0.951877
Sec31a	0.533729	5.05619	0.135313	0.951877
Tpt1	-0.376536	9.73304	0.13532	0.951877
NA	0.687418	3.6853	0.135331	0.951877
Epha6	2.15624	-4.95001	0.135445	0.951877
Glul_0	2.75639	4.85723	0.135498	0.951877
Kcnn3_0	1.76407	-5.15374	0.135647	0.951877
Or12d1	1.76407	-5.15374	0.135647	0.951877
NA	-1.48426	0.463264	0.135782	0.951877
Dock4	-0.966234	-0.862977	0.135841	0.951877
Tmem121_1	1.00725	-0.79096	0.135846	0.951877
Csf2rb	-0.696667	2.32439	0.135921	0.951877
Zbtb12	-1.62253	-2.51699	0.136056	0.951877
Agap3_0	1.93038	-3.28665	0.136117	0.951877
Tbck	-0.549704	5.77041	0.136192	0.951877
Pitx2	2.10893	-4.97408	0.136193	0.951877
Chd4	0.38231	6.45817	0.136218	0.951877
Gpr39	1.61107	-5.23465	0.136233	0.951877
Mas1	1.61107	-5.23465	0.136233	0.951877
Nkx24	1.61107	-5.23465	0.136233	0.951877
Dot1l	0.519642	6.53014	0.136316	0.951877
Znf276	0.472607	5.98156	0.136462	0.951877
Mlkl	-0.613546	3.75983	0.136483	0.951877
Col8a2	1.76969	-0.702376	0.1365	0.951877
Cdca9_0	-1.0856	2.94001	0.136614	0.951877
Dcp2	-0.665215	6.20615	0.136623	0.951877
Chsy3	-2.24804	-4.61791	0.136687	0.951877
Dock10	-1.6038	5.98203	0.136687	0.951877
Olfml2a	1.49349	-0.707136	0.136701	0.951877
Ggcx	0.512666	2.17518	0.136874	0.951877
Mrpl41a	-0.564421	6.03272	0.136914	0.951877
Dvl3	0.959398	3.7047	0.136971	0.951877
Exosc8	-0.44759	5.64269	0.136987	0.951877
Large1	-2.0545	-4.46067	0.137006	0.951877
Pax5	-2.31546	-2.40288	0.137136	0.951877
Pln	2.03992	-3.78374	0.137182	0.951877
Rbbp5	0.457515	5.43054	0.137211	0.951877
Ttc9	2.05657	-5.00082	0.137261	0.951877
Naglu	0.811622	4.36296	0.137354	0.951877
Vstm5	1.24169	-0.302547	0.137385	0.951877
Mrpl38	0.610544	5.63487	0.137497	0.951877
Hoxd11	1.78459	-5.14623	0.137515	0.951877
Lmo3	1.78459	-5.14623	0.137515	0.951877
Tmem178b_0	1.78459	-5.14623	0.137515	0.951877
Selenot	-0.495143	6.66501	0.137811	0.951877
Gsta3_1	-2.48754	-4.47658	0.137845	0.951877
Rpl10a	-0.644579	7.91427	0.13785	0.951877
Fam69b	1.72228	-2.54838	0.138131	0.951877
Bicd1	1.87601	-5.09332	0.138244	0.951877
Rph3a	1.87601	-5.09332	0.138244	0.951877
Gdpd2	1.87601	-5.09332	0.138244	0.951877
Cacna1s	1.87601	-5.09332	0.138244	0.951877
Sycp3	-1.61465	0.468717	0.138248	0.951877
Pdia2	1.3443	-1.84218	0.138431	0.951877
Epb41	0.433674	9.56814	0.138653	0.951877
Rad54l2	0.590716	4.56079	0.138677	0.951877
Mstn	3.11585	-4.46629	0.13881	0.951877
NA	2.38862	-3.44754	0.138883	0.951877
Lap3	-1.0494	2.55723	0.138923	0.951877
Efl1_0	-0.743428	3.99706	0.138957	0.951877
Acot9	-1.09655	6.20655	0.138983	0.951877
Lxn	-0.60011	2.44485	0.139042	0.951877
Tuft1	1.90374	-3.2627	0.139175	0.951877
Trim67	-2.18823	-4.41242	0.139317	0.951877
[truncated: 13,597 more rows]
