# Supplementary material for: Comparative gene expression responses to Babesia infection and oil contamination in a seabird
Source: Frontiers journal article supplement (doi:10.3389/fcosc.2024.1425484), 2024-08-22
Supplement: Table_2.XLSX [file Table_2.XLSX]

## Sheet: control vs. babesia
	positive1	positive2	positive3	control1	control2	control3
URIAAL_R14263	5.88602	6.00896	5.75407	6.03089	6.91187	6.20527
URIAAL_R14694	4.36355	5.66383	4.36355	5.70287	5.09837	4.76846
URIAAL_R09903	7.59971	7.34027	6.57881	7.90359	6.47847	6.36733
URIAAL_R14262	10.2234	9.55411	9.95376	9.82758	9.61914	9.73594
URIAAL_R09911	4.36355	4.36355	4.36355	4.36355	4.36355	4.36355
URIAAL_R14261	8.33675	8.27909	8.11978	7.8711	9.31956	7.92268
URIAAL_R09910	9.78797	12.3015	10.6261	11.4217	10.2766	9.62989
URIAAL_R14270	12.277	12.4228	12.8881	12.2449	13.4432	12.17
URIAAL_R09909	4.36355	4.36355	4.36355	4.36355	4.36355	4.36355
URIAAL_R15466	4.36355	4.36355	4.36355	4.92659	4.36355	4.36355
URIAAL_R14269	4.36355	4.36355	4.36355	4.36355	4.79084	4.36355
URIAAL_R09905	4.36355	4.36355	4.36355	4.36355	4.36355	4.36355
URIAAL_R09904	9.21282	9.94558	9.60143	9.97906	10.6737	10.476
URIAAL_R14268	13.2449	12.7271	13.1772	11.7862	12.8511	13.1553
URIAAL_R09902	7.08523	7.55427	7.5989	6.8004	7.66384	8.08423
URIAAL_R14273	5.67288	5.96567	6.56237	5.32696	6.58297	5.60916
URIAAL_R14267	5.76322	5.74747	6.1343	5.46951	5.64302	5.9564
URIAAL_R14266	8.29871	7.96484	8.73236	7.97867	7.6507	8.48494
URIAAL_R14260	5.10677	6.24019	6.01232	5.15491	4.96566	5.51699
URIAAL_R15542	4.36355	4.77713	4.36355	4.36355	4.36355	4.36355
URIAAL_R14265	4.36355	4.94647	4.36355	5.42448	4.36355	4.36355
URIAAL_R14264	4.36355	4.36355	4.36355	4.36355	4.36355	4.36355
URIAAL_R09901	4.36355	4.36355	4.36355	4.36355	5.03553	4.36355
URIAAL_R14271	4.36355	4.86922	4.68598	5.01234	4.36355	4.36355
URIAAL_R09906	4.36355	4.36355	4.36355	4.36355	4.36355	4.36355
URIAAL_R09908	8.93224	9.30277	8.77047	8.98316	8.60821	9.18778
URIAAL_R09900	9.06625	9.76097	9.1446	9.22211	9.35208	9.59832
URIAAL_R14274	5.19227	4.36355	4.36355	4.36355	4.36355	4.85866
URIAAL_R14272	4.36355	5.07511	4.36355	4.36355	4.36355	4.36355
URIAAL_R15541	4.36355	4.94647	4.36355	4.36355	4.66624	4.36355
URIAAL_R11255	7.59971	8.27511	8.57678	7.20277	8.12805	8.08859
URIAAL_R11256	7.05452	7.40797	7.82798	7.0813	7.75252	6.78074
URIAAL_R11257	10.215	10.7428	11.1817	10.0326	10.9704	10.5207
URIAAL_R09980	12.7195	12.048	12.1709	11.3369	12.0508	12.2415
URIAAL_R09981	10.5467	10.9809	9.44339	10.3353	10.1013	9.75243
URIAAL_R11252	12.5765	12.4335	11.2718	11.869	12.3292	11.8017
URIAAL_R09985	4.36355	4.36355	4.36355	4.36355	4.36355	4.36355
URIAAL_R11253	4.36355	4.36355	4.36355	4.36355	4.36355	4.36355
URIAAL_R09982	4.36355	4.94647	4.36355	4.68999	4.96566	4.36355
URIAAL_R11258	7.15913	8.50975	6.98438	7.15983	9.02646	6.74703
URIAAL_R09983	9.93933	9.77648	9.79506	9.32341	9.15418	9.71787
URIAAL_R09986	4.36355	4.36355	4.36355	4.68999	4.36355	4.36355
URIAAL_R09984	6.94129	7.66249	5.8469	6.61837	5.91999	4.93434
URIAAL_R11254	6.66125	6.24019	6.15728	7.72587	6.75748	6.48356
URIAAL_R09987	10.4376	7.65635	9.1836	9.06825	8.98297	8.96523
URIAAL_R14728	10.0055	10.0338	10.338	9.59448	10.283	9.84115
URIAAL_R11695	7.33466	6.34133	6.30716	6.82848	5.96798	6.52458
URIAAL_R11826	10.4303	10.1584	10.3608	9.39781	9.49725	10.5556
URIAAL_R11696	9.62395	9.79043	10.1528	9.28472	9.28418	9.89782
URIAAL_R01746	7.58917	8.86184	6.92258	7.68898	7.49012	8.42089
URIAAL_R01747	4.36355	4.36355	5.14539	5.01234	4.66624	4.36355
URIAAL_R11751	4.36355	4.36355	4.36355	5.08744	4.36355	4.36355
URIAAL_R01696	11.5877	12.4872	12.0369	12.0952	12.5495	11.9076
URIAAL_R01697	5.92413	6.44995	6.70347	6.44481	6.33037	6.46959
URIAAL_R01740	7.18762	10.6302	7.97837	10.4888	10.7366	8.09293
URIAAL_R11697	5.57391	6.03003	5.4565	5.63096	6.03644	5.213
URIAAL_R01748	9.17144	8.78577	8.98005	9.14588	9.30717	8.87515
URIAAL_R11752	9.02036	8.70544	9.29463	9.19628	8.96204	8.0354
URIAAL_R11698	5.40361	4.36355	4.8186	4.82423	4.88592	4.65033
URIAAL_R11753	9.95566	8.62971	10.0497	9.57858	9.57334	9.75379
URIAAL_R01749	13.0394	11.821	12.347	12.7307	12.355	11.977
URIAAL_R01750	10.1824	10.544	10.0692	11.7736	11.2409	10.5881
URIAAL_R11739	5.57391	5.96567	5.20637	5.63096	6.62532	6.28891
URIAAL_R11754	7.28297	6.83425	7.80801	7.87765	7.42968	6.09678
URIAAL_R01698	4.36355	4.36355	4.36355	5.01234	4.36355	4.36355
URIAAL_R01751	5.33896	4.65649	5.53966	4.82423	5.09837	4.36355
URIAAL_R01738	9.72506	9.38601	9.28987	8.82349	9.47159	9.2607
URIAAL_R11738	4.73823	6.20457	5.8469	5.46951	6.93414	6.33654
URIAAL_R11821	5.26897	6.05072	5.3155	4.92659	6.10117	5.9564
URIAAL_R11699	8.12108	8.05594	8.00196	6.61837	6.98826	7.25412
URIAAL_R11755	10.5905	10.4041	10.4044	9.84927	10.6113	10.7168
URIAAL_R11756	10.2909	10.4636	10.3311	9.87064	10.1507	10.7112
URIAAL_R11750	9.19572	10.1192	8.72532	9.40008	9.33794	9.25106
URIAAL_R01752	7.08523	8.40453	6.22374	5.89349	5.43231	5.57938
URIAAL_R01753	7.85817	9.76239	7.62202	8.23969	6.05841	6.38244
URIAAL_R01699	4.36355	8.03724	4.36355	5.37708	6.66636	4.36355
URIAAL_R11831	4.36355	4.36355	4.36355	4.36355	4.36355	4.36355
URIAAL_R11757	4.36355	4.36355	4.36355	4.36355	4.36355	4.36355
URIAAL_R11758	4.36355	4.36355	4.36355	4.36355	4.36355	4.36355
URIAAL_R01754	4.36355	4.36355	4.36355	4.36355	4.36355	4.36355
URIAAL_R11759	4.36355	4.77713	4.36355	4.36355	4.36355	4.36355
URIAAL_R11760	4.36355	4.36355	4.36355	4.36355	4.36355	4.36355
URIAAL_R11700	4.36355	4.36355	4.36355	5.08744	4.66624	4.36355
URIAAL_R11832	4.36355	4.36355	4.36355	4.36355	4.36355	4.36355
URIAAL_R11833	4.36355	4.36355	4.36355	4.36355	4.36355	4.36355
URIAAL_R14975	4.36355	4.36355	4.36355	4.36355	4.36355	4.36355
URIAAL_R11761	4.36355	4.36355	4.36355	4.36355	4.36355	4.36355
URIAAL_R11762	4.36355	4.77713	4.36355	4.36355	4.96566	4.36355
URIAAL_R01755	5.52047	6.22251	5.72127	5.77018	6.10117	6.84573
URIAAL_R11763	4.36355	5.07511	4.36355	5.01234	4.88592	5.16567
URIAAL_R01756	7.3845	7.42983	7.46017	6.08164	6.18239	5.63809
URIAAL_R11764	4.36355	4.36355	4.36355	4.36355	4.66624	4.36355
URIAAL_R01757	5.33896	5.74747	6.28682	5.63096	5.67416	5.213
URIAAL_R11702	4.36355	4.36355	4.91973	4.36355	4.36355	4.36355
URIAAL_R14973	7.58917	7.15068	7.7252	6.44481	6.73207	6.80275
URIAAL_R01743	5.71901	6.03003	5.68743	5.73705	5.76241	5.41495
URIAAL_R11765	4.36355	4.65649	4.36355	5.27367	4.66624	5.06039
URIAAL_R11703	11.2318	11.6806	11.5182	10.4792	11.6543	11.7918
URIAAL_R11767	4.89196	4.36355	4.36355	4.82423	4.36355	4.36355
URIAAL_R01758	4.36355	4.36355	5.00448	4.36355	4.96566	4.36355
URIAAL_R01759	5.71901	5.36014	5.90474	4.92659	5.47081	5.29977
URIAAL_R01700	5.71901	5.77394	6.59505	5.86392	6.07998	5.89065
URIAAL_R11823	7.71076	7.04993	7.45157	7.06971	6.78241	7.97074
URIAAL_R01701	5.52047	6.13008	4.68598	5.51246	5.30566	5.25757
URIAAL_R11704	4.36355	6.20457	4.36355	5.01234	5.2091	4.65033
URIAAL_R01830	10.5264	13.5478	9.62428	10.6954	9.78458	8.63507
URIAAL_R11768	5.6246	7.54097	6.81747	5.83355	5.54337	5.9349
URIAAL_R11705	10.9667	13.3394	11.1636	11.4094	10.6865	11.3166
URIAAL_R01760	13.7549	18.3688	12.7638	14.764	11.7059	13.6628
URIAAL_R11706	6.66125	7.89897	6.17984	5.59301	6.43097	6.79179
URIAAL_R11707	8.73791	8.57906	8.74285	7.92906	8.74326	8.43119
URIAAL_R01761	8.24637	9.45071	9.17072	8.46466	7.60374	8.68755
URIAAL_R11749	4.36355	4.36355	4.36355	4.36355	4.88592	4.36355
URIAAL_R01762	7.30905	6.96164	7.56747	6.97328	6.81897	7.95171
URIAAL_R11708	5.10677	5.23077	5.3155	4.36355	4.96566	5.16567
URIAAL_R01805	6.70213	8.60461	6.97224	6.8423	6.67977	6.65274
URIAAL_R01763	4.89196	6.09106	5.36507	5.01234	4.36355	4.36355
URIAAL_R11769	5.71901	5.07511	6.52885	5.15491	5.54337	5.06039
URIAAL_R01820	10.3306	10.3162	10.1645	9.57257	10.2756	10.6828
URIAAL_R01821	9.66674	10.1755	9.83966	9.18843	9.87823	10.2027
URIAAL_R11770	4.36355	4.36355	4.36355	5.27367	4.36355	4.36355
URIAAL_R01703	8.09168	7.99909	9.21656	8.4819	8.11383	8.01723
URIAAL_R01702	10.3585	11.3307	10.7882	9.85588	10.7496	10.8201
URIAAL_R11771	5.71901	5.50716	5.90474	5.73705	5.61089	6.17017
URIAAL_R11742	7.77715	8.86184	8.26311	10.0046	6.01406	7.73483
URIAAL_R11772	6.48372	6.22251	5.36507	5.37708	5.43231	6.60296
URIAAL_R01764	11.8316	11.0544	11.9409	10.9629	10.9096	11.2659
URIAAL_R11709	8.90724	9.00766	10.8199	9.05105	10.1013	9.86282
URIAAL_R01704	6.48372	5.1825	7.05503	6.42611	6.87777	6.11555
URIAAL_R11747	5.00894	4.94647	6.49445	6.00468	5.91999	5.66621
URIAAL_R11710	7.29607	8.10165	6.28682	6.69725	6.22107	7.18155
URIAAL_R01816	5.6246	6.09106	6.1343	4.36355	5.43231	5.82084
URIAAL_R01819	5.46389	6.05072	5.68743	5.2166	5.61089	5.41495
URIAAL_R01695	6.19123	7.42983	6.22374	6.17714	6.16259	6.05834
URIAAL_R11773	4.36355	4.36355	4.36355	5.89349	4.79084	4.85866
URIAAL_R11711	5.88602	5.84973	5.61625	6.30777	6.14246	5.60916
URIAAL_R11774	10.689	10.9446	10.9316	10.4663	10.7511	10.5295
URIAAL_R11820	5.10677	5.72032	5.49899	5.01234	4.96566	5.33991
URIAAL_R11825	7.95131	8.17187	8.10353	8.18274	6.447	8.08423
URIAAL_R11822	7.2429	6.75399	6.67339	6.86952	6.5392	7.79491
URIAAL_R01705	12.8686	12.6007	12.8707	11.3439	12.4563	13.4211
URIAAL_R11712	12.8794	12.1108	12.2485	12.155	12.4946	12.7856
URIAAL_R01765	11.3281	11.0532	11.2999	11.049	11.8807	11.3794
URIAAL_R11775	12.87	13.2203	13.5862	12.9312	13.6611	13.3036
URIAAL_R11776	7.45609	7.43704	7.32523	6.8423	7.68331	8.50459
URIAAL_R11713	5.88602	6.82307	6.11088	6.28692	5.91999	6.07771
URIAAL_R14791	11.1961	11.2299	11.9694	10.8979	11.7924	11.9614
URIAAL_R11777	6.19123	5.66383	6.52885	6.60201	6.62532	6.30499
URIAAL_R01766	6.16091	5.94341	6.78986	5.15491	5.34997	6.11555
URIAAL_R01767	4.36355	4.36355	4.36355	4.36355	4.36355	4.36355
URIAAL_R01768	4.36355	4.36355	4.36355	5.27367	4.36355	4.36355
URIAAL_R11778	4.36355	4.36355	4.36355	5.01234	4.79084	4.36355
URIAAL_R11779	4.36355	4.36355	4.36355	4.36355	4.88592	4.36355
URIAAL_R11780	5.26897	5.07511	5.00448	4.36355	4.96566	4.36355
URIAAL_R11827	4.36355	4.36355	4.36355	4.36355	4.36355	4.36355
URIAAL_R01769	9.6392	9.07993	9.87818	10.6208	9.43221	8.92939
URIAAL_R01706	5.10677	4.94647	4.36355	5.08744	4.66624	4.36355
URIAAL_R01707	4.89196	5.27621	4.8186	6.08164	4.66624	5.60916
URIAAL_R11824	5.26897	5.01419	6.01232	5.2166	5.70441	6.07771
URIAAL_R11714	11.6876	11.0434	10.7687	11.5887	11.5791	11.1776
URIAAL_R01708	9.20942	9.24718	8.60006	9.62383	9.24142	8.29858
URIAAL_R01770	7.64111	6.8118	6.99641	7.1042	7.08061	6.80275
URIAAL_R11737	8.87321	8.04662	7.95439	8.44281	7.92572	8.69327
URIAAL_R01709	8.68001	8.41901	8.01361	8.88303	7.99985	8.43461
URIAAL_R11781	8.157	8.74042	8.05928	9.50477	8.24568	7.78956
URIAAL_R01710	8.25964	8.09715	7.79454	8.1668	8.34223	7.99881
URIAAL_R11782	5.10677	5.07511	4.36355	6.15396	5.34997	4.93434
URIAAL_R01711	4.36355	4.77713	5.00448	5.89349	4.66624	4.36355
URIAAL_R01737	6.03145	6.14913	6.11088	6.28692	5.76241	6.05834
URIAAL_R01771	4.36355	4.36355	4.36355	4.92659	4.36355	4.36355
URIAAL_R01731	5.26897	4.65649	4.8186	5.70287	5.2091	4.76846
URIAAL_R11783	7.11527	6.16789	6.44108	6.30777	5.64302	6.17017
URIAAL_R01732	4.73823	4.36355	4.68598	5.42448	4.36355	4.36355
URIAAL_R11743	4.36355	4.94647	4.36355	5.42448	4.36355	5.25757
URIAAL_R01712	6.94129	5.27621	5.4565	7.13784	5.50778	5.79656
URIAAL_R11745	10.0346	8.08809	9.19637	9.71027	9.24575	9.31907
URIAAL_R11784	9.89768	7.81896	7.95439	10.1244	7.43738	8.70179
URIAAL_R15299	7.28297	6.32502	6.59505	7.42689	6.98826	6.93772
URIAAL_R11785	10.1579	9.16599	9.31818	10.1434	9.46603	9.41196
URIAAL_R01772	8.14274	7.02113	7.1863	7.48854	6.75748	7.69523
URIAAL_R11701	5.19227	5.27621	4.8186	6.40713	5.03553	5.51699
URIAAL_R11715	6.68185	5.07511	5.95978	5.70287	5.2091	6.32086
URIAAL_R11786	8.19894	7.53428	7.20702	7.93535	7.37457	7.78956
URIAAL_R01713	10.1789	10.1476	10.117	11.2723	10.6205	10.8116
URIAAL_R11716	7.7396	7.84074	7.4342	8.6816	7.71519	7.99417
URIAAL_R01773	12.2623	11.7793	11.5263	12.1413	11.8945	11.8529
URIAAL_R11736	9.7948	8.79965	8.99475	9.71027	9.51352	9.72902
URIAAL_R01714	9.13961	9.00287	9.08817	10.3235	9.19061	10.4585
URIAAL_R01774	6.95805	8.14594	7.56747	7.42689	6.66636	6.88739
URIAAL_R01775	4.36355	5.1825	4.36355	6.17714	4.96566	4.85866
URIAAL_R11741	5.26897	4.36355	4.8186	5.51246	5.03553	5.54868
URIAAL_R11748	5.67288	4.36355	5.2628	5.46951	4.96566	5.06039
URIAAL_R11787	7.53524	7.67469	8.2236	6.63452	7.91481	8.01723
URIAAL_R11788	5.88602	6.18637	5.75407	7.04623	5.25885	6.11555
URIAAL_R01715	10.8678	10.7775	11.2284	13.3075	12.4283	11.0706
URIAAL_R15301	4.73823	4.36355	4.68598	4.36355	4.96566	5.25757
URIAAL_R15300	4.36355	4.36355	4.36355	4.92659	4.96566	4.36355
URIAAL_R01776	7.26974	5.72032	6.68852	7.83784	7.80082	6.79179
URIAAL_R11733	12.7045	12.1728	13.0011	13.1474	13.746	12.2704
URIAAL_R01777	13.0906	12.5936	13.3445	13.1823	13.7906	13.2209
URIAAL_R01779	5.10677	4.36355	4.36355	4.36355	4.66624	4.65033
URIAAL_R01716	11.5917	11.7908	11.6016	11.6975	11.7289	11.9799
URIAAL_R01780	4.89196	4.94647	4.36355	4.36355	4.66624	4.36355
URIAAL_R01778	11.7351	11.5814	11.403	11.3004	12.2627	11.1664
URIAAL_R11789	9.78341	7.71068	9.46042	8.58123	8.56717	8.11018
URIAAL_R01781	8.27931	7.61259	8.44576	7.85124	7.89273	7.05146
URIAAL_R11790	4.36355	4.94647	5.00448	5.2166	4.36355	5.25757
URIAAL_R11791	10.4186	10.4584	10.6843	10.3541	11.0847	10.5509
URIAAL_R14790	4.36355	4.36355	5.00448	5.01234	4.79084	4.36355
URIAAL_R11792	4.36355	4.36355	4.36355	5.2166	4.36355	4.36355
URIAAL_R11717	4.36355	4.36355	4.36355	4.82423	4.36355	4.36355
URIAAL_R11793	4.73823	5.69246	4.68598	6.48142	5.54337	5.74631
URIAAL_R01782	4.36355	4.36355	5.00448	6.00468	5.30566	5.16567
URIAAL_R11735	8.27278	6.94121	7.57539	8.37517	7.29186	7.60643
URIAAL_R11794	8.64007	8.44755	7.4342	9.21183	7.74637	8.44143
URIAAL_R01783	12.0493	10.9954	10.6587	11.8775	11.2731	11.5095
URIAAL_R11740	6.45974	8.37882	6.24513	7.24443	5.76241	6.45547
URIAAL_R11718	11.4606	12.9243	11.6366	11.0874	11.0799	11.312
URIAAL_R01784	8.60937	8.79688	7.82798	8.91191	8.81801	8.62314
URIAAL_R11719	11.3116	11.3259	11.046	11.6734	11.561	11.0998
URIAAL_R01717	9.84168	9.90513	9.16813	9.83596	9.90449	10.0355
URIAAL_R01785	6.33259	7.3091	7.24755	6.78614	7.27472	6.7356
URIAAL_R11795	10.9485	10.8867	10.7289	9.97755	10.3008	10.7575
URIAAL_R01718	7.45609	7.0404	6.30716	7.96643	7.14838	7.37446
URIAAL_R01742	10.8775	12.2227	10.453	11.532	11.4705	10.0231
URIAAL_R11732	6.16091	5.72032	5.07869	5.70287	5.57771	5.82084
URIAAL_R01786	6.76121	6.69358	6.78986	7.53097	7.04033	6.81363
URIAAL_R01787	4.36355	4.36355	4.36355	4.36355	4.36355	4.36355
URIAAL_R01788	7.92651	7.59342	7.52716	7.15983	7.42194	8.09726
URIAAL_R11796	7.03891	7.42258	7.10019	7.33384	6.62532	7.55033
URIAAL_R01789	5.71901	5.84973	6.38539	4.68999	6.47847	6.52458
URIAAL_R11819	9.73928	9.62122	9.54866	9.21954	9.91948	9.64616
URIAAL_R01790	10.4318	10.3589	10.4604	10.475	10.7976	10.75
URIAAL_R11797	9.20942	8.68763	8.53711	8.49894	8.63162	8.7437
URIAAL_R15298	9.91866	10.3867	9.1733	9.81914	9.8372	10.5819
URIAAL_R01828	7.3845	8.03253	7.2966	7.22376	7.63744	7.878
URIAAL_R11798	5.92413	5.43662	6.03774	6.03089	5.96798	6.81363
URIAAL_R11799	4.89196	4.36355	4.36355	4.36355	4.79084	4.93434
URIAAL_R11720	4.36355	4.36355	4.36355	4.36355	4.36355	4.36355
URIAAL_R01739	4.89196	5.50716	5.57869	5.42448	5.2091	5.45023
URIAAL_R11800	4.36355	5.1825	5.4565	5.01234	5.15586	4.76846
URIAAL_R11801	5.84658	4.77713	4.8186	4.36355	5.34997	5.54868
URIAAL_R11802	7.03891	7.23631	6.03774	6.22222	6.55395	7.06052
URIAAL_R01791	11.4185	11.6025	11.5299	9.7901	11.4354	12.0684
URIAAL_R11734	7.61018	5.9207	8.64553	8.21408	6.77	6.91781
URIAAL_R01813	5.40361	6.60412	5.72127	6.10623	5.7338	5.72028
URIAAL_R11803	9.61883	9.20194	9.19127	9.55236	8.7091	8.12297
URIAAL_R11830	7.26974	6.98176	7.34399	7.60428	6.81897	6.46959
URIAAL_R01792	13.1506	12.7672	13.7317	13.1438	12.3926	11.73
URIAAL_R11744	8.27931	7.99425	8.92278	7.89068	8.12805	8.57751
URIAAL_R01793	4.36355	4.94647	4.68598	4.82423	5.03553	4.76846
URIAAL_R01808	4.36355	4.36355	4.36355	4.36355	4.36355	4.36355
URIAAL_R11721	4.36355	4.36355	4.36355	4.68999	4.88592	4.36355
URIAAL_R11804	10.9566	11.0451	10.8565	10.6169	10.8751	10.835
URIAAL_R01794	13.4702	13.2722	14.2873	13.0876	13.6844	12.5044
URIAAL_R01736	13.7004	13.2507	13.7296	13.529	14.5734	12.9654
URIAAL_R11805	12.5051	12.2747	11.9402	11.9828	12.4638	12.3712
URIAAL_R01795	4.36355	5.07511	4.91973	4.82423	4.96566	4.76846
URIAAL_R01796	9.69376	10.3334	10.2708	9.04527	10.0515	10.0611
URIAAL_R01797	6.33259	7.75728	5.00448	5.95042	6.03644	5.41495
URIAAL_R01817	11.5546	13.135	11.6145	11.8021	10.5705	11.5965
URIAAL_R01806	10.3993	12.484	10.8812	11.3184	10.2106	10.157
URIAAL_R14974	11.0211	10.2174	10.2563	9.78318	10.3049	10.0522
URIAAL_R01798	10.6202	10.3673	10.4	9.68636	9.98571	10.3031
URIAAL_R01735	4.36355	4.36355	4.36355	4.36355	4.36355	4.36355
URIAAL_R11722	5.6246	6.43499	5.3155	5.63096	4.88592	5.72028
URIAAL_R01799	5.10677	4.65649	4.91973	4.36355	4.79084	5.4842
URIAAL_R01800	6.24971	5.82504	6.57881	6.00468	6.65282	7.08736
URIAAL_R11806	10.0556	10.5456	10.4305	10.0855	9.86843	10.0456
URIAAL_R01719	9.71311	9.55901	9.29463	9.11036	9.44357	9.71226
URIAAL_R01734	5.80569	7.2196	6.83106	6.24417	6.71919	6.8976
URIAAL_R01733	4.36355	5.47256	6.89706	4.68999	5.70441	4.36355
URIAAL_R11807	6.38498	7.37829	6.40422	6.13033	7.1389	6.03865
URIAAL_R01812	8.83394	10.6932	8.72884	8.9952	8.45536	6.72407
URIAAL_R01832	5.10677	8.14594	6.68852	6.68185	5.86989	5.33991
URIAAL_R11808	10.2435	10.5039	9.87501	10.0925	10.0918	10.7466
URIAAL_R01801	12.1002	12.3994	12.2226	11.4383	12.4389	12.5694
URIAAL_R01720	12.7954	11.8589	11.3314	12.02	12.4261	11.876
URIAAL_R11723	12.3063	12.9139	13.3698	12.2819	13.2404	12.8929
URIAAL_R01721	5.10677	4.36355	4.36355	4.36355	4.36355	5.16567
URIAAL_R01722	4.36355	4.36355	4.36355	4.36355	4.79084	4.36355
URIAAL_R11809	4.36355	5.07511	4.36355	5.15491	5.15586	4.76846
URIAAL_R11810	5.46389	7.1329	7.05503	6.38787	7.32553	7.02389
URIAAL_R01811	9.02424	9.14223	8.75673	8.32347	8.95411	9.56137
URIAAL_R01826	8.79811	9.69428	9.20397	8.55703	9.31132	9.4845
URIAAL_R01723	8.50757	9.06163	8.76704	8.51578	8.47029	8.5431
URIAAL_R01822	4.36355	4.65649	4.36355	4.36355	4.36355	4.36355
URIAAL_R11724	4.36355	4.36355	4.68598	4.36355	4.36355	4.36355
URIAAL_R01802	4.36355	4.36355	4.36355	4.36355	4.36355	4.36355
URIAAL_R01809	4.36355	4.36355	4.36355	4.82423	4.36355	4.36355
URIAAL_R01810	4.36355	4.36355	4.36355	4.36355	4.36355	4.36355
URIAAL_R01744	4.36355	4.36355	4.36355	4.36355	4.36355	4.36355
URIAAL_R01827	4.36355	4.36355	4.36355	4.36355	4.66624	4.36355
URIAAL_R11811	4.36355	4.36355	4.36355	4.36355	4.36355	4.36355
URIAAL_R01724	4.36355	4.36355	4.36355	4.36355	4.36355	4.36355
URIAAL_R11812	4.36355	5.07511	5.36507	5.01234	5.57771	4.36355
URIAAL_R11725	4.36355	4.36355	4.36355	4.36355	4.36355	4.36355
URIAAL_R01725	4.36355	4.36355	4.36355	4.36355	4.36355	4.36355
URIAAL_R01726	8.3738	7.81896	9.6148	9.18055	8.71224	9.19785
URIAAL_R11746	11.2115	10.7564	10.8573	10.8215	11.4349	11.5634
URIAAL_R01727	5.19227	4.36355	4.68598	5.2166	4.36355	4.76846
URIAAL_R11813	6.16091	6.29177	6.44108	6.28692	5.54337	5.74631
URIAAL_R11731	11.7052	11.6568	11.836	10.9667	11.9691	11.0689
URIAAL_R11730	4.36355	4.36355	4.36355	4.36355	4.36355	4.36355
URIAAL_R11726	12.6579	12.2908	12.5043	12.1146	12.3862	12.2632
URIAAL_R01745	6.99097	5.07511	5.4565	8.01477	4.79084	5.11504
URIAAL_R11828	8.52413	9.21235	8.93807	9.31384	8.75853	9.00938
URIAAL_R01818	8.32418	8.43335	8.11978	7.7689	8.16987	8.18529
URIAAL_R11814	9.92903	9.21027	8.66773	9.59842	7.27472	8.42089
URIAAL_R11727	14.5736	12.3411	13.2117	14.9089	12.1552	11.7049
URIAAL_R01807	5.26897	5.69246	5.07869	5.83355	5.09837	5.25757
URIAAL_R01829	5.52047	5.47256	4.36355	5.66754	4.79084	4.36355
URIAAL_R11815	4.36355	4.36355	4.91973	4.92659	4.36355	4.36355
URIAAL_R11728	7.34729	7.50717	8.63053	6.68185	6.43097	7.6003
URIAAL_R11729	12.0316	11.8012	12.057	12.0713	12.178	11.9134
URIAAL_R01728	5.96101	5.79979	5.36507	5.63096	5.25885	5.25757
URIAAL_R01825	4.36355	5.60408	5.00448	4.36355	5.2091	5.25757
URIAAL_R01824	5.26897	5.82504	5.49899	6.03089	5.94423	5.91299
URIAAL_R11816	11.6021	11.9405	11.7659	11.8876	12.1349	11.7425
URIAAL_R01729	10.7405	11.4745	11.3948	11.0633	11.351	10.9644
URIAAL_R01815	4.36355	4.36355	4.36355	4.36355	4.36355	4.36355
URIAAL_R01730	10.0837	10.022	9.85584	9.35877	9.26723	10.2928
URIAAL_R11817	4.36355	4.36355	4.36355	5.42448	4.36355	4.36355
URIAAL_R11829	9.32398	9.10249	9.54468	8.22438	9.57334	9.94757
URIAAL_R11818	9.9718	9.83956	9.66524	9.8804	10.076	9.98176
URIAAL_R01803	4.36355	4.36355	4.36355	4.36355	4.36355	4.36355
URIAAL_R01741	4.36355	4.36355	4.36355	4.36355	4.36355	4.36355
URIAAL_R01804	10.1945	10.0173	10.4866	10.07	10.7419	10.1897
URIAAL_R01814	5.00894	5.07511	5.2628	4.36355	5.64302	5.63809
URIAAL_R01823	4.89196	4.36355	5.2628	4.82423	4.36355	4.76846
URIAAL_R09616	6.41038	6.05072	6.52885	6.26573	6.3648	7.07847
URIAAL_R07932	8.09908	8.83513	8.86314	9.09925	8.56717	8.65863
URIAAL_R09602	7.92651	8.01352	8.62298	8.15608	8.09947	7.67791
URIAAL_R07933	5.19227	5.3992	5.07869	4.36355	5.84398	6.09678
URIAAL_R09601	8.06922	7.07815	7.98431	8.10123	8.55322	6.98626
URIAAL_R07954	4.36355	4.36355	4.36355	4.36355	4.36355	4.36355
URIAAL_R07923	4.36355	4.36355	4.36355	5.70287	4.79084	4.36355
URIAAL_R09617	7.05452	7.9093	8.51277	7.2648	7.15779	7.60643
URIAAL_R07934	4.36355	4.36355	5.20637	5.27367	4.66624	4.93434
URIAAL_R09600	4.36355	4.36355	4.36355	4.92659	4.36355	4.36355
URIAAL_R07922	10.8956	11.3529	10.9833	11.5852	11.1335	10.9602
URIAAL_R07921	5.84658	6.40452	6.62695	6.10623	5.50778	5.86786
URIAAL_R09633	8.19894	8.19734	8.06489	7.35295	8.16987	8.59288
URIAAL_R07920	11.4591	11.5191	11.4655	11.3574	11.6355	11.2806
URIAAL_R07953	7.42075	6.07106	5.98635	6.17714	5.86989	6.56436
URIAAL_R09599	4.36355	4.77713	4.36355	4.36355	4.36355	4.36355
URIAAL_R09618	12.2935	13.3417	12.544	13.302	12.1721	11.9787
URIAAL_R09598	10.2099	10.8552	10.2168	10.2068	9.51352	10.1826
URIAAL_R07935	7.9676	9.69724	8.47966	7.96643	7.42968	9.00249
URIAAL_R09619	8.90303	8.98841	9.8134	8.42061	9.00616	9.19182
URIAAL_R09620	7.22929	7.08743	7.62202	7.27487	7.80082	7.56928
URIAAL_R07936	4.36355	4.36355	4.36355	4.36355	4.36355	4.36355
URIAAL_R07952	5.52047	5.66383	5.3155	5.15491	5.50778	5.06039
URIAAL_R09596	4.36355	4.36355	4.36355	4.36355	4.79084	4.36355
URIAAL_R09595	7.06996	6.86723	7.44291	7.65876	7.1389	7.35268
URIAAL_R07924	4.36355	4.36355	4.36355	4.36355	4.36355	4.36355
URIAAL_R09621	4.36355	4.36355	4.36355	4.36355	4.36355	4.36355
URIAAL_R09603	4.36355	4.36355	4.36355	5.01234	4.79084	4.36355
URIAAL_R07931	5.6246	5.50716	6.20199	5.37708	5.43231	5.37823
URIAAL_R07937	4.36355	4.77713	4.36355	4.36355	4.36355	4.36355
URIAAL_R07938	4.36355	4.36355	4.36355	4.36355	4.36355	4.36355
URIAAL_R09604	4.36355	4.36355	4.36355	4.36355	4.36355	4.36355
URIAAL_R09605	4.36355	4.36355	4.68598	5.37708	4.96566	4.36355
URIAAL_R07955	10.1455	11.3163	10.9224	11.0006	12.0322	10.9048
URIAAL_R07939	9.81284	10.6518	10.0155	9.03656	10.3935	10.0242
URIAAL_R09622	11.719	12.0533	12.2198	11.0811	12.5823	11.9872
URIAAL_R07940	4.36355	4.36355	4.36355	4.36355	5.34997	4.36355
URIAAL_R07941	4.36355	4.36355	5.36507	4.82423	4.36355	4.36355
URIAAL_R09612	4.36355	4.36355	4.36355	4.36355	4.36355	4.36355
URIAAL_R09613	4.36355	4.36355	4.36355	5.01234	4.36355	4.36355
URIAAL_R07942	6.50727	6.59083	6.54572	6.28692	6.85456	6.64047
URIAAL_R09606	10.9228	11.5629	11.0614	10.8614	10.8667	11.4908
URIAAL_R07943	11.7445	11.9824	12.3289	11.2149	11.8821	12.4203
URIAAL_R09607	4.73823	5.13086	5.14539	5.27367	5.09837	5.74631
URIAAL_R09623	4.89196	5.98752	5.93259	5.32696	5.09837	5.86786
URIAAL_R07944	4.36355	4.36355	4.36355	4.36355	4.36355	4.36355
URIAAL_R09608	4.36355	4.36355	4.36355	4.36355	4.36355	4.36355
URIAAL_R07925	4.36355	4.36355	4.36355	5.15491	4.36355	4.36355
URIAAL_R07945	4.36355	4.36355	4.36355	4.36355	4.36355	4.36355
URIAAL_R07926	4.36355	4.36355	5.00448	4.36355	4.36355	4.36355
URIAAL_R09624	4.36355	4.36355	5.00448	4.82423	4.36355	4.36355
URIAAL_R07927	10.2829	10.9564	10.973	9.69561	10.5574	11.6336
URIAAL_R09625	6.64032	7.261	6.44108	6.28692	5.64302	5.86786
URIAAL_R07928	6.61906	6.98176	6.11088	6.19989	5.61089	5.86786
URIAAL_R09628	4.36355	4.77713	5.00448	4.36355	4.36355	4.36355
URIAAL_R09627	4.36355	4.36355	4.36355	4.36355	4.36355	4.36355
URIAAL_R09626	4.36355	4.36355	4.36355	5.08744	4.36355	4.65033
URIAAL_R07946	10.8016	11.5543	11.279	10.6391	11.0536	11.77
URIAAL_R09629	6.22081	6.75399	6.20199	6.8423	7.15779	6.95735
URIAAL_R09630	8.77064	8.68763	9.14723	8.57722	7.50484	8.38598
URIAAL_R09631	11.591	11.4976	11.8506	10.813	11.4829	11.7087
URIAAL_R09615	4.36355	4.36355	4.36355	4.36355	4.36355	4.36355
URIAAL_R14876	5.6246	5.69246	6.73289	5.83355	6.18239	5.72028
URIAAL_R07947	9.22298	9.51767	9.55462	8.33301	9.46974	9.85648
URIAAL_R09614	9.60077	9.27524	9.90174	9.55236	9.8415	9.71927
URIAAL_R09611	6.83614	6.29177	7.16527	5.15491	6.12199	6.48356
URIAAL_R07929	4.89196	4.36355	4.8186	5.55357	4.96566	4.36355
URIAAL_R09609	7.72044	6.77741	5.61625	6.22222	5.43231	6.27263
URIAAL_R09634	4.36355	4.36355	4.36355	4.36355	4.36355	4.36355
URIAAL_R09635	4.36355	4.94647	4.36355	4.36355	4.36355	4.36355
URIAAL_R07930	11.2183	10.9446	11.0275	10.7656	11.352	11.0068
URIAAL_R07948	5.33896	5.87389	6.36628	5.73705	6.25857	6.11555
URIAAL_R09632	11.3645	11.2426	10.9987	11.4688	11.4861	11.6447
URIAAL_R07949	8.94867	8.0744	8.03663	8.72203	7.24859	8.0354
URIAAL_R07950	5.40361	4.94647	4.8186	5.86392	4.79084	4.36355
URIAAL_R09610	5.92413	5.1825	5.65245	4.82423	5.57771	5.37823
URIAAL_R07951	5.26897	6.20457	5.72127	5.59301	5.70441	5.51699
URIAAL_R07840	5.6246	5.54055	5.8469	5.01234	5.54337	5.72028
URIAAL_R03587	11.2376	12.3376	11.9879	11.1877	11.471	11.4981
URIAAL_R07873	12.0835	11.8342	11.5504	11.5995	11.9763	12.0681
URIAAL_R07872	4.36355	4.36355	4.36355	4.36355	5.30566	4.36355
URIAAL_R03553	4.73823	4.36355	4.36355	4.36355	4.96566	4.76846
URIAAL_R03559	11.104	11.2974	11.1976	11.2561	11.2306	11.7059
URIAAL_R07871	5.40361	7.15068	6.56237	6.05654	7.06062	6.01862
URIAAL_R07876	9.24641	9.55574	9.78158	9.40008	9.49907	9.78884
URIAAL_R03564	4.36355	4.36355	4.36355	4.36355	4.66624	4.36355
URIAAL_R07870	5.10677	6.84533	6.45911	5.32696	5.09837	5.60916
URIAAL_R03586	4.36355	4.36355	4.36355	4.36355	4.36355	4.36355
URIAAL_R03585	5.26897	7.58049	6.52885	7.49713	6.8428	6.32086
URIAAL_R03584	10.4932	10.4301	10.5565	9.78145	10.065	10.6728
URIAAL_R07839	4.36355	4.36355	4.8186	4.82423	4.36355	4.36355
URIAAL_R07838	4.36355	4.77713	4.36355	5.46951	4.36355	4.36355
URIAAL_R07869	9.33651	9.36751	9.93865	9.10203	8.96992	9.83342
URIAAL_R03583	11.1276	11.311	10.9324	10.112	10.2456	9.87542
URIAAL_R07868	4.89196	4.94647	5.20637	4.36355	5.54337	5.16567
URIAAL_R03588	9.5452	9.52102	9.5704	8.51996	9.38192	9.72206
URIAAL_R03582	5.6246	5.57283	5.87619	5.55357	5.84398	5.77172
URIAAL_R07837	7.20165	6.74213	6.56237	7.24443	7.06062	6.44119
URIAAL_R07836	4.36355	4.36355	4.36355	4.36355	4.79084	4.36355
URIAAL_R07867	4.36355	4.36355	4.36355	5.2166	4.66624	4.36355
URIAAL_R07877	8.90724	7.89377	9.0093	8.3519	8.02034	8.40354
URIAAL_R03593	11.5673	10.6745	10.9707	10.9879	9.78904	11.471
URIAAL_R07866	9.24641	8.95903	9.39991	9.19367	8.55672	8.90745
URIAAL_R07865	6.27795	6.07106	6.17984	7.4712	5.3921	5.4842
URIAAL_R07864	12.9665	12.2966	12.8104	13.8042	12.4799	12.7838
URIAAL_R07863	5.40361	5.07511	5.2628	4.82423	4.79084	5.9564
URIAAL_R03581	10.2502	10.24	10.7695	9.54624	9.76057	10.7383
URIAAL_R03580	7.78638	11.024	7.12222	8.47761	8.71224	7.48527
URIAAL_R07862	4.36355	5.77394	4.36355	4.36355	4.79084	4.65033
URIAAL_R07861	8.46816	9.17453	8.39781	8.64382	8.84399	9.21184
URIAAL_R03579	4.36355	4.36355	4.36355	4.36355	4.36355	4.36355
URIAAL_R15189	4.36355	4.36355	4.36355	4.36355	4.36355	4.36355
URIAAL_R15188	4.36355	4.36355	4.36355	4.36355	4.79084	4.36355
URIAAL_R03578	4.36355	4.36355	4.36355	4.36355	4.36355	4.36355
URIAAL_R03577	4.36355	4.36355	4.36355	4.36355	4.36355	4.36355
URIAAL_R03590	10.1131	10.0754	9.50419	9.43582	10.0076	10.1289
URIAAL_R07874	8.03872	8.47899	8.74633	7.18147	8.59466	8.56197
URIAAL_R07835	8.8689	8.43335	8.56893	8.40261	7.32553	8.76826
URIAAL_R03576	4.89196	5.36014	5.3155	4.82423	5.15586	5.45023
URIAAL_R07860	10.025	9.42231	9.35963	9.8804	9.00104	9.4812
URIAAL_R07859	4.36355	4.36355	4.36355	4.36355	4.36355	4.36355
URIAAL_R03558	4.36355	4.36355	4.36355	4.36355	4.36355	4.36355
URIAAL_R07858	12.5569	12.4857	12.7937	11.4817	12.3938	12.2108
URIAAL_R07857	4.36355	4.36355	5.00448	5.27367	4.79084	4.36355
URIAAL_R07856	13.9627	13.8298	14.2086	13.1467	14.2801	13.9499
URIAAL_R03562	4.36355	4.36355	4.36355	4.36355	4.36355	4.36355
URIAAL_R03575	4.36355	4.36355	4.36355	4.92659	4.36355	4.36355
URIAAL_R03574	4.36355	4.36355	4.36355	4.36355	4.36355	4.36355
URIAAL_R07855	4.36355	4.36355	4.36355	4.92659	4.36355	4.36355
URIAAL_R15190	4.36355	5.27621	5.00448	4.82423	5.03553	5.37823
URIAAL_R03557	6.16091	6.11073	5.8469	5.80232	5.43231	6.60296
URIAAL_R03563	8.67508	8.37139	8.50044	7.91638	8.60483	8.83696
URIAAL_R03573	6.61906	8.98598	7.03188	8.93709	5.67416	6.33654
URIAAL_R07875	4.36355	6.77741	6.15728	6.08164	6.65282	5.57938
URIAAL_R07854	8.44515	9.01719	7.75334	10.1134	7.68975	7.96601
URIAAL_R03572	7.42075	7.66249	7.52716	7.1042	6.86621	7.28519
URIAAL_R03571	6.41038	6.73016	5.68743	6.46324	5.7338	6.30499
URIAAL_R07853	5.10677	5.07511	5.07869	4.82423	5.15586	4.65033
URIAAL_R03570	10.8881	10.8789	11.197	10.6515	11.0914	11.0831
URIAAL_R03591	4.36355	4.36355	4.36355	4.36355	4.36355	4.36355
URIAAL_R03589	4.36355	4.36355	4.36355	4.36355	4.36355	4.36355
URIAAL_R07852	4.36355	4.36355	4.36355	4.36355	4.36355	4.65033
URIAAL_R03569	5.71901	6.55014	5.65245	5.83355	5.3921	4.85866
URIAAL_R07841	5.6246	7.4865	5.00448	4.36355	4.36355	4.36355
URIAAL_R07851	5.00894	4.36355	4.36355	5.01234	4.36355	4.36355
URIAAL_R07850	7.67138	6.80044	7.65974	6.44481	6.61135	7.30805
URIAAL_R07834	9.41244	10.3682	10.5306	10.5864	10.4695	10.0851
URIAAL_R03556	4.36355	4.36355	4.36355	4.82423	4.88592	5.33991
URIAAL_R03560	6.22081	6.27481	6.44108	6.32827	5.94423	6.49737
URIAAL_R07833	11.9366	12.3813	12.28	11.2085	12.161	12.3537
URIAAL_R07843	4.36355	4.77713	4.36355	4.36355	4.96566	4.85866
URIAAL_R07849	5.10677	6.18637	6.06262	4.36355	6.10117	6.57735
URIAAL_R03568	4.36355	4.94647	4.8186	4.36355	5.09837	5.00069
URIAAL_R03567	4.36355	4.36355	5.00448	4.36355	4.36355	4.36355
URIAAL_R03555	4.36355	4.36355	4.36355	5.08744	4.36355	4.36355
URIAAL_R03561	4.36355	4.36355	4.36355	4.36355	4.96566	4.36355
URIAAL_R07832	4.36355	4.36355	4.36355	5.01234	4.36355	4.36355
URIAAL_R07831	4.36355	4.36355	4.36355	5.08744	4.36355	4.36355
URIAAL_R07848	4.36355	4.36355	4.36355	4.36355	4.36355	4.36355
URIAAL_R07842	4.36355	4.36355	4.36355	4.36355	4.36355	4.36355
URIAAL_R14972	4.36355	4.36355	4.36355	4.36355	4.79084	4.36355
URIAAL_R07847	4.36355	4.36355	4.36355	5.15491	4.36355	4.36355
URIAAL_R03566	5.80569	5.82504	5.20637	5.89349	5.2091	4.93434
URIAAL_R07846	9.65928	10.0114	10.2367	9.74274	9.98441	10.2265
URIAAL_R07845	4.36355	5.01419	4.91973	5.70287	4.36355	5.00069
URIAAL_R03554	5.19227	4.86922	5.72127	4.92659	5.64302	5.66621
URIAAL_R03592	6.41038	5.98752	6.28682	5.55357	6.16259	5.77172
URIAAL_R03565	9.58511	8.99083	8.90421	8.64382	8.67088	8.32831
URIAAL_R07844	13.2967	13.2208	13.3013	12.9502	14.4076	13.2234
URIAAL_R06421	4.36355	4.36355	4.36355	5.46951	4.66624	4.36355
URIAAL_R15107	6.97461	6.14913	6.56237	7.64341	6.50919	6.07771
URIAAL_R14657	5.71901	6.29177	6.11088	6.10623	6.3128	6.07771
URIAAL_R06419	8.43934	8.89325	8.27282	9.95772	8.81509	8.43802
URIAAL_R06383	8.78444	8.74903	7.98431	9.38415	8.03048	7.77336
URIAAL_R02074	9.80159	9.56389	8.97413	10.2551	9.48264	9.42059
URIAAL_R02128	9.19228	9.15739	8.93503	10.2514	9.74229	9.3998
URIAAL_R02126	8.12833	7.83533	7.61436	8.70746	8.35033	8.14823
URIAAL_R02125	6.72212	6.18637	6.84452	6.8423	6.3648	7.31559
URIAAL_R15391	4.36355	5.13086	5.07869	5.92231	4.96566	4.93434
URIAAL_R06384	8.58327	7.9093	7.67455	9.01307	8.12333	8.00344
URIAAL_R14863	5.19227	4.94647	4.36355	5.95042	5.34997	4.93434
URIAAL_R14656	11.9123	11.9641	12.3396	12.1901	12.8995	11.5022
URIAAL_R15105	10.796	9.73524	10.4022	10.6657	10.5364	10.1425
URIAAL_R14862	10.5494	9.73235	10.0748	11.3106	10.487	10.6662
URIAAL_R02122	8.17112	7.50032	7.33464	7.65111	7.54096	7.47189
URIAAL_R02124	8.27931	7.90415	7.74636	8.1179	7.84176	7.52467
URIAAL_R15387	6.70213	7.57398	6.11088	7.79688	6.80689	6.62808
URIAAL_R15389	8.38594	8.86976	7.35328	9.08242	8.02542	7.86788
URIAAL_R15390	8.48518	8.7433	7.67455	9.71392	8.49604	8.29482
URIAAL_R06379	10.4376	12.9744	10.0748	11.8804	10.7968	10.3207
URIAAL_R14864	4.36355	4.36355	4.36355	5.92231	4.36355	4.76846
URIAAL_R02082	8.20581	9.16384	8.25333	8.6666	9.26296	7.7404
URIAAL_R15106	4.36355	4.36355	4.36355	5.15491	4.66624	4.65033
URIAAL_R02121	7.55706	7.11489	6.94764	8.34249	7.20394	7.53756
URIAAL_R06380	6.33259	5.57283	5.90474	7.58026	5.81746	6.15223
URIAAL_R06382	6.38498	5.96567	6.40422	6.82848	6.8428	6.36733
URIAAL_R15393	4.36355	4.65649	5.14539	5.08744	4.79084	4.65033
URIAAL_R02120	7.20165	7.1329	7.80801	8.13439	8.44784	7.79491
URIAAL_R02119	10.6531	10.372	10.1129	10.9991	10.5204	10.2739
URIAAL_R06381	9.30497	9.22884	8.82085	9.48144	9.11444	8.92696
URIAAL_R02118	5.10677	6.20457	6.95999	6.19989	5.09837	7.13953
URIAAL_R02117	5.6246	4.94647	5.14539	5.46951	4.36355	4.36355
URIAAL_R15388	4.36355	4.36355	5.00448	4.36355	4.36355	4.36355
URIAAL_R06378	6.70213	6.22251	6.51176	7.15983	6.65282	6.84573
URIAAL_R02116	4.89196	4.65649	5.2628	5.80232	5.47081	5.11504
URIAAL_R06361	7.47916	7.41529	7.0435	7.19216	7.1389	6.91781
URIAAL_R06362	5.71901	6.14913	7.82136	7.17069	7.34207	8.29482
URIAAL_R06363	7.20165	7.63151	6.38539	7.46245	5.76241	6.32086
URIAAL_R02066	8.97297	9.536	8.82415	8.33776	9.02898	9.3501
URIAAL_R06375	10.2234	10.6318	9.77649	9.4599	10.3619	10.8968
URIAAL_R06416	6.24971	6.13008	7.05503	5.89349	6.22107	5.72028
URIAAL_R06415	7.03891	7.261	6.64261	6.78614	6.49392	6.6649
URIAAL_R02065	7.02311	7.15068	6.01232	7.55583	6.69304	6.01862
URIAAL_R06360	7.76785	14.837	7.53531	11.9649	8.60483	6.51105
URIAAL_R02115	7.66136	8.67563	8.32972	7.92273	9.11207	8.10588
URIAAL_R02064	6.22081	7.42983	5.87619	5.37708	7.05051	6.86672
URIAAL_R06414	5.10677	5.36014	5.41195	5.66754	4.36355	4.93434
URIAAL_R02114	4.89196	4.77713	4.36355	5.63096	4.36355	4.36355
URIAAL_R02083	5.26897	5.1825	4.8186	5.63096	5.15586	4.36355
URIAAL_R02063	8.32418	8.61722	9.06607	7.52259	8.51055	8.53038
URIAAL_R02062	10.4008	9.61809	9.72458	8.81332	9.58877	9.84115
URIAAL_R06359	9.57985	8.78577	9.60335	8.49045	8.92736	9.80737
URIAAL_R14867	6.24971	5.27621	5.4565	4.36355	5.3921	5.54868
URIAAL_R06413	5.76322	6.8118	7.00833	6.34845	6.55395	6.09678
URIAAL_R02061	10.0669	10.3113	9.72458	10.2824	10.0552	9.87165
URIAAL_R02113	4.36355	4.36355	4.36355	4.36355	4.36355	4.36355
URIAAL_R06412	4.73823	4.36355	4.36355	5.15491	4.36355	4.36355
URIAAL_R06376	8.27931	8.55633	8.19324	8.15608	8.59125	9.31352
URIAAL_R06358	5.10677	4.77713	4.36355	4.36355	4.36355	4.36355
URIAAL_R02060	6.38498	6.65598	7.28693	6.55168	7.19483	6.36733
URIAAL_R06377	4.36355	4.36355	4.36355	4.36355	4.36355	4.36355
URIAAL_R02112	6.03145	6.57741	6.22374	5.46951	5.76241	5.45023
URIAAL_R06357	7.53524	10.5098	7.7252	8.45159	8.98556	7.95171
URIAAL_R02111	9.67663	9.81929	10.2672	9.49209	10.284	9.85648
URIAAL_R02059	5.40361	5.43662	4.36355	5.27367	4.66624	5.84459
URIAAL_R02110	5.71901	6.16789	6.76168	6.24417	5.99125	6.27263
URIAAL_R06411	4.89196	4.36355	5.72127	4.36355	5.3921	4.85866
URIAAL_R02081	4.36355	4.36355	4.36355	5.27367	4.36355	4.36355
URIAAL_R02109	4.36355	4.36355	4.36355	5.46951	4.36355	4.36355
URIAAL_R06410	6.4353	6.56384	6.26615	7.2648	7.10031	6.59022
URIAAL_R06418	4.89196	5.31923	4.8186	5.01234	5.70441	5.213
URIAAL_R02108	4.89196	4.36355	4.36355	5.01234	4.66624	4.76846
URIAAL_R06409	4.36355	4.36355	5.00448	4.36355	4.36355	4.36355
URIAAL_R02123	4.36355	4.36355	4.36355	5.55357	4.36355	4.36355
URIAAL_R02107	4.36355	4.36355	4.36355	4.36355	4.66624	4.36355
URIAAL_R06372	5.00894	4.36355	4.36355	4.36355	4.36355	4.65033
URIAAL_R02086	4.36355	4.36355	4.36355	5.46951	4.36355	4.36355
URIAAL_R02058	4.36355	4.36355	4.8186	5.2166	4.88592	4.36355
URIAAL_R02057	4.36355	5.07511	5.14539	5.46951	4.96566	4.36355
URIAAL_R02106	9.60596	9.99339	9.85584	10.0827	9.64397	9.87416
URIAAL_R06356	4.36355	4.77713	4.68598	4.68999	4.88592	6.11555
URIAAL_R06422	5.10677	4.36355	4.8186	4.36355	4.79084	5.16567
URIAAL_R02105	4.36355	4.36355	4.36355	4.36355	4.79084	5.82084
URIAAL_R06355	11.6754	11.5036	11.4952	11.0683	11.3828	11.3697
URIAAL_R06408	4.89196	4.36355	4.8186	4.36355	4.36355	4.36355
URIAAL_R06407	4.73823	4.36355	4.36355	4.36355	4.66624	4.36355
URIAAL_R06354	4.36355	4.65649	4.68598	4.36355	4.36355	4.65033
URIAAL_R02104	13.6071	13.6821	14.0347	13.5511	14.3464	13.5831
URIAAL_R02056	5.26897	6.05072	6.03774	5.97787	4.36355	4.36355
URIAAL_R02103	11.2908	10.3986	12.5904	11.4306	9.27149	9.82436
URIAAL_R02102	6.22081	5.9207	5.68743	6.00468	6.12199	6.28891
URIAAL_R02101	10.0911	10.1574	10.5956	9.65449	9.67482	10.2644
URIAAL_R06406	6.83614	6.18637	6.51176	5.37708	5.7338	6.88739
URIAAL_R06405	7.76785	6.65598	7.98431	7.33384	6.81897	7.4786
URIAAL_R06404	8.45094	8.07898	8.67506	7.45364	8.89735	8.56197
URIAAL_R02080	4.36355	4.36355	4.8186	4.36355	5.25885	4.65033
URIAAL_R06364	7.45609	7.84074	7.61436	7.4712	6.92305	7.46515
URIAAL_R02067	5.26897	5.13086	5.53966	6.22222	5.81746	4.85866
URIAAL_R06403	4.36355	4.36355	5.20637	5.15491	4.79084	4.36355
URIAAL_R06402	6.16091	6.56384	6.93517	6.03089	6.61135	6.65274
URIAAL_R02100	15.8105	15.1222	15.8218	15.0285	14.6663	15.0246
URIAAL_R06401	9.78341	8.27112	8.69682	9.88364	8.9959	9.37694
URIAAL_R06370	5.88602	5.96567	6.36628	6.13033	6.69304	6.95735
URIAAL_R02076	6.03145	5.66383	5.98635	5.97787	5.86989	6.55123
URIAAL_R06400	4.36355	4.36355	4.36355	4.36355	4.36355	4.36355
URIAAL_R02099	4.36355	4.36355	4.36355	5.55357	4.36355	5.00069
URIAAL_R06399	5.76322	5.54055	6.28682	5.55357	5.86989	6.07771
URIAAL_R02127	8.57799	8.7433	8.23854	8.76136	8.75853	8.32093
URIAAL_R02098	6.35905	6.32502	7.37167	6.22222	7.74637	8.18529
URIAAL_R06369	11.7608	12.0208	12.2997	11.6128	12.2355	11.9614
URIAAL_R02097	5.10677	6.20457	6.08699	6.13033	6.39831	5.72028
URIAAL_R06374	6.76121	6.83425	6.94764	6.17714	5.89521	5.72028
URIAAL_R02096	7.20165	7.00158	7.17583	6.8423	7.04033	7.1898
URIAAL_R02095	11.2641	11.6284	11.3128	11.4726	11.5061	11.3069
URIAAL_R02094	10.5996	10.4601	10.3183	9.5625	10.0601	9.88167
URIAAL_R06368	9.47327	10.1766	10.0127	9.16465	10.195	9.915
URIAAL_R02078	11.725	11.8115	11.7456	11.9293	11.507	11.4527
URIAAL_R06386	11.0307	10.9754	10.8149	10.5815	10.7265	11.2013
URIAAL_R02069	6.19123	6.30851	5.49899	6.22222	5.25885	5.79656
URIAAL_R06387	8.01541	12.6049	8.0078	10.4941	8.97516	8.43119
URIAAL_R14866	11.636	10.774	11.0353	10.5573	11.2858	10.993
URIAAL_R02085	12.6097	11.344	11.6944	11.1593	12.2188	11.5657
URIAAL_R06388	5.71901	10.7028	6.49445	8.5892	7.67685	6.67694
URIAAL_R06417	6.8721	6.74213	7.10019	7.28488	7.04033	6.74703
URIAAL_R02087	4.36355	4.77713	4.36355	4.36355	4.36355	4.76846
URIAAL_R02084	4.73823	6.71807	5.36507	6.26573	5.61089	7.55668
URIAAL_R02088	4.36355	4.36355	4.36355	4.36355	4.36355	4.36355
URIAAL_R06365	4.36355	4.36355	4.36355	4.36355	4.36355	4.36355
URIAAL_R06420	4.36355	4.36355	4.36355	4.36355	4.36355	4.36355
URIAAL_R06389	4.36355	4.36355	4.36355	4.36355	4.36355	4.36355
URIAAL_R15392	4.36355	4.36355	4.36355	4.36355	4.36355	4.36355
URIAAL_R15689	4.36355	4.36355	4.36355	4.36355	4.36355	4.36355
URIAAL_R06390	4.36355	4.36355	4.36355	4.36355	4.36355	4.36355
URIAAL_R06366	5.99676	4.36355	7.26738	5.27367	7.03007	5.06039
URIAAL_R06385	4.36355	4.65649	4.36355	4.36355	4.36355	4.65033
URIAAL_R06391	4.89196	4.36355	4.36355	4.36355	4.36355	4.36355
URIAAL_R06367	9.72268	9.3431	9.77309	8.65145	9.12389	9.12793
URIAAL_R02068	7.85817	7.92975	8.8917	6.19989	7.20394	8.05335
URIAAL_R06392	4.36355	4.36355	4.68598	5.01234	4.96566	4.93434
URIAAL_R06373	7.3722	8.24694	8.61538	8.43397	8.56717	8.9605
URIAAL_R06393	4.36355	4.36355	5.00448	4.36355	4.36355	4.76846
URIAAL_R02079	4.36355	4.36355	4.36355	5.27367	4.36355	4.36355
URIAAL_R06394	9.49019	9.65821	10.125	9.23485	10.4583	8.98863
URIAAL_R02089	12.1766	12.3442	12.3439	12.147	12.9977	11.3634
URIAAL_R02090	12.8238	12.2322	12.3784	11.7117	12.4259	12.8301
URIAAL_R06395	8.96491	8.75759	8.91662	8.87328	9.04648	9.00249
URIAAL_R02070	8.41585	8.03724	8.14115	8.79276	7.8703	7.33796
URIAAL_R02077	4.36355	4.77713	5.20637	6.00468	4.36355	4.76846
URIAAL_R02071	6.57548	6.20457	6.17984	5.70287	6.447	6.56436
URIAAL_R02091	11.3592	11.0532	10.6014	10.3738	11.2941	10.9561
URIAAL_R06396	6.03145	5.1825	5.87619	5.42448	5.09837	5.4842
URIAAL_R14865	5.71901	5.57283	5.14539	6.71248	5.09837	5.4842
URIAAL_R06397	7.55706	7.261	8.32039	7.12672	7.61054	7.18155
URIAAL_R02092	10.3554	9.77788	9.51442	9.68265	9.90586	9.36448
URIAAL_R02073	11.5007	11.0116	10.8669	11.0937	11.5584	11.1411
URIAAL_R02075	12.4043	10.6895	11.3034	11.4503	11.7188	11.3768
URIAAL_R06398	4.36355	4.36355	4.36355	4.36355	4.79084	4.36355
URIAAL_R02093	4.36355	4.77713	4.36355	4.36355	4.66624	4.36355
URIAAL_R02072	7.33466	7.09664	7.92382	7.1042	7.8703	7.88805
URIAAL_R06371	5.88602	6.07106	6.20199	5.01234	5.30566	5.37823
URIAAL_R08358	7.29607	7.34027	7.8147	7.17069	6.61135	7.35268
URIAAL_R02947	6.88973	7.0404	6.15728	7.25465	5.7338	6.03865
URIAAL_R08356	8.52961	8.92904	8.01361	8.60108	9.08329	8.74919
URIAAL_R08357	4.36355	4.36355	4.36355	4.68999	4.36355	4.36355
URIAAL_R02946	10.0075	9.78207	9.22157	10.8721	8.89735	10.0622
URIAAL_R15492	6.06515	5.13086	4.36355	6.66626	4.36355	4.65033
URIAAL_R08355	8.32418	8.27909	7.84767	9.10481	7.29186	7.24624
URIAAL_R08354	4.36355	4.36355	5.14539	6.28692	5.30566	5.41495
URIAAL_R02945	5.80569	5.36014	4.36355	6.44481	4.96566	5.16567
URIAAL_R15218	5.40361	4.65649	4.36355	5.27367	4.36355	4.36355
URIAAL_R08359	4.36355	4.36355	4.36355	4.36355	4.36355	4.36355
URIAAL_R08360	4.36355	4.36355	4.36355	4.36355	4.36355	4.36355
URIAAL_R03451	5.26897	5.3992	4.36355	7.71123	5.09837	4.36355
URIAAL_R03409	4.36355	5.1825	5.14539	5.42448	4.36355	4.36355
URIAAL_R00429	5.26897	5.23077	4.36355	4.36355	5.2091	4.36355
URIAAL_R03450	5.40361	6.70588	5.8469	6.88293	5.2091	5.11504
URIAAL_R03449	4.73823	5.66383	5.07869	6.38787	4.36355	5.00069
URIAAL_R00383	5.26897	4.77713	4.8186	5.32696	4.96566	5.11504
URIAAL_R00428	7.5242	7.71068	7.16527	7.27487	7.46023	7.59415
URIAAL_R03420	10.3722	10.4929	10.9685	10.012	10.4263	10.4383
URIAAL_R00427	10.4434	10.3296	10.2105	9.25751	9.95694	9.88417
URIAAL_R00426	4.36355	5.82504	5.20637	6.00468	5.2091	5.37823
URIAAL_R03408	11.0461	14.0515	11.1194	12.5223	12.1969	9.57688
URIAAL_R00425	4.36355	4.36355	4.36355	4.82423	4.36355	4.36355
URIAAL_R03414	9.29858	10.2581	8.43284	10.676	10.0037	9.44108
URIAAL_R00382	9.84168	8.7172	8.32506	10.5604	10.3327	8.36104
URIAAL_R03448	4.36355	4.36355	4.36355	5.27367	4.36355	4.36355
URIAAL_R03457	9.59818	9.20611	9.32284	10.06	9.39563	8.47169
URIAAL_R00424	12.1779	12.2173	12.262	12.1487	12.7684	12.2461
URIAAL_R03447	8.36769	9.10696	8.311	9.16732	8.57409	9.16332
URIAAL_R00435	8.57799	7.4865	7.06646	7.80379	7.16715	7.51818
URIAAL_R00423	9.90611	9.81656	9.63931	8.98013	10.0126	9.92715
URIAAL_R03407	12.7087	12.5689	12.647	12.0222	12.5365	12.1589
URIAAL_R00381	9.08494	8.06981	8.99182	9.70479	8.56717	8.12297
URIAAL_R00380	10.3038	10.0935	9.86225	9.67893	10.5302	10.3678
URIAAL_R03446	9.66922	9.29496	10.3833	9.05105	11.0781	9.92836
URIAAL_R03411	10.4274	10.1455	10.789	9.76924	12.098	10.7905
URIAAL_R00379	9.36431	8.99083	9.38438	10.1555	9.38977	9.40676
URIAAL_R00378	10.2435	10.4292	10.2756	10.4413	9.9154	10.0411
URIAAL_R03406	12.5502	12.2638	12.2304	11.6292	12.167	12.75
URIAAL_R00377	6.27795	6.97173	7.40774	6.10623	6.62532	6.20527
URIAAL_R15415	6.64032	7.56087	7.83458	7.63567	6.71919	6.36733
URIAAL_R00422	7.49056	7.98451	7.50241	7.27487	6.95605	6.6649
URIAAL_R03452	7.42075	7.65635	6.40422	7.4799	6.9006	7.00521
URIAAL_R03445	6.30557	5.50716	5.65245	5.89349	5.09837	5.213
URIAAL_R00421	8.53507	8.36017	7.91763	8.0207	8.04554	8.824
URIAAL_R00376	10.7592	10.4852	10.7446	11.025	10.9944	11.3125
URIAAL_R00434	10.5454	10.7649	10.667	10.9536	11.2136	10.4932
URIAAL_R00420	12.3023	12.3406	12.6994	12.577	12.613	12.7551
URIAAL_R03444	9.81507	9.40064	8.37997	9.27489	8.02542	10.247
URIAAL_R03405	7.30905	7.70474	8.16222	8.03249	7.38257	7.74595
URIAAL_R03443	5.84658	4.36355	4.36355	6.49934	5.03553	5.213
URIAAL_R03463	8.39798	8.69953	8.95019	8.39352	8.23259	8.21347
URIAAL_R03461	7.18762	8.51986	8.09259	7.97867	7.84752	7.50511
URIAAL_R03442	7.99965	8.65438	7.75334	8.2498	7.27472	7.56299
URIAAL_R00387	10.8417	10.583	9.98351	11.9282	9.67963	9.35731
URIAAL_R00375	8.79811	9.63366	9.32284	9.28472	8.82382	7.77336
URIAAL_R15413	5.96101	6.52229	6.03774	6.34845	6.41475	6.25613
URIAAL_R03412	8.73318	10.7435	8.45004	9.44463	8.44407	8.59899
URIAAL_R00395	8.34299	9.50249	9.37991	9.32341	9.4379	9.28735
URIAAL_R00419	4.36355	4.36355	4.36355	5.27367	4.79084	4.93434
URIAAL_R00374	7.54619	7.71659	8.53711	8.29933	8.61494	7.61252
URIAAL_R00418	5.26897	5.57283	4.8186	4.36355	5.34997	5.45023
URIAAL_R00417	10.4098	11.2457	10.9407	10.7237	11.1176	10.993
URIAAL_R00416	8.66018	8.63282	7.80129	7.96643	8.56021	9.03658
URIAAL_R03441	8.21265	8.75759	8.56499	8.47761	9.39953	9.35191
URIAAL_R00373	10.0114	10.0536	9.65048	10.7541	10.3944	9.45458
URIAAL_R00415	4.36355	4.36355	4.36355	4.36355	4.36355	5.16567
URIAAL_R03440	4.73823	4.65649	4.36355	5.32696	5.2091	5.16567
URIAAL_R00414	13.0028	12.6283	12.8731	12.0872	12.632	13.4692
URIAAL_R03413	4.36355	4.36355	4.36355	4.36355	4.66624	5.213
URIAAL_R00372	11.382	10.999	11.7517	11.2992	11.5462	11.2048
URIAAL_R03404	11.83	11.3105	11.7092	12.3358	11.5636	11.7517
URIAAL_R03403	12.2991	11.8264	12.7794	12.1917	12.4486	12.1687
URIAAL_R03439	4.36355	4.94647	5.2628	5.27367	5.30566	4.36355
URIAAL_R03402	4.36355	4.36355	4.36355	4.36355	4.79084	4.36355
URIAAL_R00431	8.33675	7.88332	8.08158	7.45364	7.2309	8.49152
URIAAL_R00413	12.0354	12.293	11.9664	11.9786	12.049	11.9195
URIAAL_R00412	10.5099	11.1254	12.262	11.3504	11.5396	11.7418
URIAAL_R03401	9.65178	9.30082	9.90951	10.1092	9.18611	8.96523
URIAAL_R00437	11.4067	11.458	11.7672	10.9946	11.8286	11.5513
URIAAL_R03438	7.2429	7.93987	7.79454	7.1155	7.76475	7.18155
URIAAL_R00411	10.442	10.4826	11.0565	9.72298	10.5496	10.4391
URIAAL_R03400	9.03197	9.25122	9.33675	9.17262	9.50812	9.38048
URIAAL_R00410	13.9694	14.1369	14.9524	14.6464	14.5762	14.1475
URIAAL_R00371	12.69	12.2944	12.7933	12.6399	12.5991	12.7343
URIAAL_R00409	9.15385	7.763	9.83803	8.55703	9.7545	9.13214
URIAAL_R00370	6.16091	6.13008	6.32718	5.89349	5.57771	5.89065
URIAAL_R00408	9.43301	9.32787	8.45004	9.82589	9.15188	8.98631
URIAAL_R00407	5.33896	5.89754	5.49899	6.51702	5.09837	5.51699
URIAAL_R03437	8.98097	8.46161	9.31116	8.61677	8.51416	7.82664
URIAAL_R03453	8.66018	8.83513	9.30173	8.55296	8.62163	8.80302
URIAAL_R03458	9.02424	8.87238	9.32517	9.18581	8.95411	8.85745
URIAAL_R00369	7.11527	7.43704	8.16743	6.90936	7.42194	8.12297
URIAAL_R00406	11.9721	11.6384	11.7761	11.4256	12.2027	11.9732
URIAAL_R03399	7.13004	6.71807	7.96643	7.51415	7.06062	7.87295
URIAAL_R00405	4.36355	5.23077	4.36355	5.37708	5.09837	4.93434
URIAAL_R00404	4.36355	4.36355	5.36507	5.15491	5.09837	4.36355
URIAAL_R14742	6.24971	4.77713	5.20637	5.2166	5.15586	5.66621
URIAAL_R00368	9.57722	10.3995	9.65788	10.3887	9.92759	10.2127
URIAAL_R03436	5.26897	4.86922	5.57869	5.97787	4.79084	5.69359
URIAAL_R00385	8.39197	8.48931	8.39337	7.80379	7.39054	8.96286
URIAAL_R00367	10.7156	10.9984	10.735	10.4878	10.7798	10.672
URIAAL_R03398	10.5099	10.8925	10.8549	11.2567	10.8737	10.7091
URIAAL_R00366	5.52047	5.79979	5.2628	6.66626	5.96798	6.65274
URIAAL_R03435	6.94129	6.98176	5.95978	6.89621	6.14246	6.52458
URIAAL_R03397	7.85817	6.96164	6.95999	8.04999	7.37457	7.91779
URIAAL_R00430	5.80569	6.87805	6.30716	6.15396	5.3921	5.91299
URIAAL_R00432	5.19227	5.23077	4.8186	4.36355	5.25885	5.57938
URIAAL_R00365	6.97461	7.0594	6.52885	6.94807	6.25857	6.93772
URIAAL_R00403	9.97981	10.3142	10.5556	9.618	10.5213	10.0037
URIAAL_R03434	5.00894	4.77713	6.22374	4.36355	6.14246	5.69359
URIAAL_R14927	4.36355	4.36355	4.68598	4.36355	4.36355	4.36355
URIAAL_R03459	4.36355	4.36355	4.36355	4.36355	4.66624	4.65033
URIAAL_R00364	4.89196	5.50716	6.77585	5.2166	5.84398	6.17017
URIAAL_R00436	7.47916	7.18557	8.45857	7.31446	8.77963	7.45838
URIAAL_R00402	8.85589	8.41179	9.15249	8.69274	9.4398	8.76284
URIAAL_R03460	7.00713	6.27481	7.3625	6.49934	6.91187	7.17325
URIAAL_R00363	8.84715	8.45108	8.41981	8.53243	8.42886	9.32827
URIAAL_R03433	9.2662	8.84855	8.3436	9.52772	8.81217	9.07862
URIAAL_R00401	5.26897	5.9207	6.17984	6.22222	6.3477	6.67694
URIAAL_R00362	9.50136	10.664	11.0808	10.0296	10.005	9.84628
URIAAL_R03432	7.32191	6.85632	6.74736	6.30777	6.3128	7.6003
URIAAL_R00400	8.74263	9.12029	8.76704	8.02661	8.05053	8.49807
URIAAL_R03431	11.3211	13.5968	12.3616	11.9262	12.6482	12.0719
URIAAL_R00361	10.8839	10.3026	10.0355	10.2081	10.5583	10.9448
URIAAL_R03415	10.4362	9.9703	10.1697	9.29449	9.66838	9.74695
URIAAL_R00399	6.68185	5.74747	6.28682	5.83355	6.3477	6.30499
URIAAL_R00398	7.51308	7.02113	7.05503	6.42611	6.3477	6.99577
URIAAL_R03396	10.4008	9.93306	10.7966	9.86082	10.3974	9.68103
URIAAL_R00360	7.11527	6.74213	6.38539	6.51702	6.52428	6.52458
URIAAL_R15414	5.40361	4.65649	4.36355	5.15491	4.36355	5.06039
URIAAL_R03395	4.89196	5.13086	5.14539	4.36355	4.79084	5.41495
URIAAL_R00359	10.7823	10.6013	10.7227	9.67706	10.5756	11.0085
URIAAL_R00433	7.68133	8.11953	7.55148	9.51525	7.95797	8.50459
URIAAL_R00438	8.31786	8.37882	8.0194	9.5215	7.90381	8.3393
URIAAL_R03394	8.17112	8.15464	8.30155	8.51159	7.34207	7.71799
URIAAL_R03430	9.5452	9.65669	10.4541	9.06254	10.4593	10.1467
URIAAL_R00397	8.9281	9.53766	9.10722	8.28465	9.21292	9.14261
URIAAL_R00396	4.89196	5.13086	5.57869	5.27367	4.66624	6.09678
URIAAL_R03462	10.1348	10.7915	10.284	11.2636	10.948	10.4082
URIAAL_R03410	5.10677	4.86922	5.61625	5.46951	5.64302	4.36355
URIAAL_R14715	4.89196	5.13086	4.36355	6.72754	5.09837	4.76846
URIAAL_R03429	4.73823	4.77713	5.00448	5.42448	5.2091	4.93434
URIAAL_R00394	9.79025	10.7457	10.7315	10.4707	10.5765	11.1988
URIAAL_R00358	4.36355	4.36355	4.36355	5.37708	4.96566	4.76846
URIAAL_R03416	7.32191	7.21117	7.17583	8.98919	6.83093	7.81615
URIAAL_R00389	4.36355	4.36355	4.36355	5.77018	4.66624	4.36355
URIAAL_R03455	4.36355	4.36355	4.68598	5.42448	5.09837	4.36355
URIAAL_R03454	10.2699	10.4557	10.4142	10.9636	10.7188	11.1063
URIAAL_R03456	7.3598	8.14157	8.23358	8.54478	8.4212	8.05335
URIAAL_R03393	7.46767	6.86723	7.02016	7.76182	6.8428	7.08736
URIAAL_R03428	11.4229	10.8545	11.5524	12.0724	11.5791	10.8421
URIAAL_R03427	9.35202	9.07081	8.86953	10.1285	9.7113	9.6695
URIAAL_R00357	6.45974	5.57283	5.95978	6.88293	6.67977	7.02389
URIAAL_R03392	9.70829	8.56937	7.71091	9.19888	9.08086	8.951
URIAAL_R00356	15.2695	14.4442	14.7704	14.3547	14.2959	14.9783
URIAAL_R00388	4.73823	5.07511	5.14539	5.15491	5.64302	4.76846
URIAAL_R03418	4.36355	4.94647	5.00448	4.36355	4.36355	4.36355
URIAAL_R00393	11.5398	12.4671	12.1115	12.5349	13.047	12.2917
URIAAL_R03391	9.71551	9.54755	8.91662	10.0671	9.55775	9.5041
URIAAL_R03390	10.0688	9.77788	9.41091	10.4685	9.48997	9.97943
URIAAL_R03426	4.36355	4.36355	4.36355	4.36355	4.88592	4.65033
URIAAL_R03417	5.00894	4.36355	4.36355	4.82423	4.36355	4.65033
URIAAL_R14926	4.73823	4.36355	5.14539	5.46951	5.30566	4.36355
URIAAL_R03425	5.00894	4.65649	4.68598	5.01234	4.36355	4.36355
URIAAL_R03424	7.03891	6.03003	5.95978	5.73705	6.20188	6.65274
URIAAL_R03419	8.502	7.86219	7.89259	9.89652	7.82436	8.21745
URIAAL_R03389	10.3707	10.206	9.81671	11.4715	10.942	9.92594
URIAAL_R03423	4.36355	4.36355	4.36355	4.68999	4.66624	4.36355
URIAAL_R00355	4.36355	4.86922	5.00448	5.2166	5.09837	4.36355
URIAAL_R00384	4.36355	4.65649	4.8186	4.82423	4.36355	4.76846
URIAAL_R03388	4.36355	5.07511	5.36507	5.15491	4.36355	5.33991
URIAAL_R00354	4.36355	4.36355	4.68598	5.27367	4.36355	4.93434
URIAAL_R03422	4.36355	4.94647	5.14539	5.86392	4.66624	4.85866
URIAAL_R00392	4.36355	5.07511	5.00448	5.08744	4.79084	5.11504
URIAAL_R00386	10.8318	10.1681	10.5436	10.6908	10.251	9.99105
URIAAL_R03387	11.8421	11.6221	11.9095	12.1842	11.6973	11.4615
URIAAL_R03386	10.8934	11.005	10.2828	11.3357	10.7117	11.2281
URIAAL_R00391	7.71076	6.93089	6.74736	7.55583	6.23996	8.03088
URIAAL_R03421	11.4419	11.2355	10.9928	11.3333	10.7549	12.1319
URIAAL_R00390	6.09792	4.36355	5.2628	6.10623	5.2091	5.63809
URIAAL_R05105	6.99097	7.08743	7.87351	6.46324	8.87792	7.94691
URIAAL_R09573	11.4476	10.9978	11.5324	10.9834	11.5034	10.6116
URIAAL_R09574	8.12833	7.45135	8.10897	6.94807	8.53205	8.12297
URIAAL_R15049	5.10677	4.77713	4.68598	4.92659	4.36355	4.85866
URIAAL_R05095	10.6902	9.92676	11.06	11.76	10.7404	10.0666
URIAAL_R05106	4.89196	5.72032	5.36507	5.97787	5.47081	5.60916
URIAAL_R05100	8.22624	6.94121	7.9961	7.52259	7.26606	7.87295
URIAAL_R05094	6.92432	4.36355	4.36355	4.36355	4.36355	7.86279
URIAAL_R09575	11.1884	11.2846	10.4391	11.0162	11.1974	11.4027
URIAAL_R05103	4.89196	4.77713	5.00448	5.15491	5.61089	4.76846
URIAAL_R15050	4.36355	4.36355	4.36355	4.82423	4.36355	4.36355
URIAAL_R09569	9.25963	9.089	9.37318	9.67893	9.29049	8.87264
URIAAL_R05098	9.42129	8.76893	9.40432	9.62383	8.91924	9.51058
URIAAL_R09576	4.36355	4.36355	4.36355	4.36355	4.36355	4.36355
URIAAL_R05102	4.36355	4.36355	4.36355	4.36355	4.36355	4.36355
URIAAL_R14984	4.36355	4.36355	4.36355	4.68999	4.36355	4.36355
URIAAL_R09587	4.36355	4.36355	4.36355	4.82423	4.36355	4.36355
URIAAL_R09586	4.36355	4.36355	4.8186	4.36355	4.36355	4.36355
URIAAL_R09568	11.7474	12.1077	11.9284	11.3753	12.5057	11.6266
URIAAL_R09577	6.27795	5.98752	6.06262	6.90936	7.0905	6.42675
URIAAL_R09578	4.36355	4.36355	4.8186	5.15491	4.36355	4.36355
URIAAL_R05099	9.86131	8.94661	9.4856	9.52565	8.61158	9.61795
URIAAL_R09579	4.36355	4.36355	4.36355	4.36355	4.36355	4.36355
URIAAL_R09567	4.36355	4.36355	4.36355	5.63096	5.03553	4.36355
URIAAL_R09566	4.36355	4.36355	4.36355	4.68999	5.09837	4.36355
URIAAL_R05125	4.36355	4.36355	4.36355	4.36355	4.36355	4.36355
URIAAL_R05107	5.00894	4.77713	5.68743	5.92231	7.04033	5.41495
URIAAL_R05108	8.38594	7.8728	9.40432	8.79621	10.4138	9.11523
URIAAL_R09580	4.36355	4.94647	4.36355	4.36355	4.36355	4.36355
URIAAL_R05109	5.80569	6.38901	5.00448	5.27367	4.79084	4.85866
URIAAL_R09565	10.8548	10.823	11.1519	10.9999	11.0944	11.4178
URIAAL_R09564	4.36355	4.36355	4.36355	5.08744	5.2091	4.36355
URIAAL_R05122	4.89196	6.55014	6.73289	7.03434	6.12199	6.57735
URIAAL_R05110	12.9145	12.5397	12.9615	11.8497	12.4705	13.0594
URIAAL_R09591	7.85817	8.44047	8.55311	7.7547	8.45161	8.56509
URIAAL_R09563	4.89196	5.57283	5.98635	5.46951	5.25885	4.65033
URIAAL_R05124	5.84658	7.59984	6.95999	6.81451	7.01974	5.72028
URIAAL_R05123	8.60419	10.7021	8.33436	9.12138	9.33794	8.48494
URIAAL_R05093	11.0113	11.396	10.677	10.06	11.5241	10.1508
URIAAL_R05092	4.36355	4.36355	4.36355	5.27367	4.36355	4.36355
URIAAL_R05101	4.36355	5.01419	4.36355	5.37708	4.36355	4.36355
URIAAL_R09562	4.73823	4.36355	4.36355	5.42448	4.36355	4.36355
URIAAL_R09561	4.36355	4.94647	4.68598	5.70287	4.96566	4.36355
URIAAL_R09593	9.99963	9.70168	9.63369	9.95001	10.1553	9.35371
URIAAL_R09581	12.599	11.2522	12.2635	12.1999	11.0769	11.3078
URIAAL_R09588	4.36355	4.36355	4.36355	5.01234	4.36355	4.76846
URIAAL_R14983	4.36355	4.36355	4.68598	4.36355	4.88592	4.76846
URIAAL_R05091	11.6931	11.5242	11.2676	11.7508	11.464	11.7287
URIAAL_R05090	9.30178	9.65516	9.63556	8.60502	9.24142	9.85775
URIAAL_R09560	5.52047	4.36355	4.36355	5.59301	4.36355	5.11504
URIAAL_R05111	8.90724	8.48244	8.59621	9.48571	9.14261	8.73264
URIAAL_R05089	4.36355	5.07511	6.03774	5.83355	4.36355	5.33991
URIAAL_R09582	12.7183	11.887	12.6677	11.8047	11.7884	12.0771
URIAAL_R05112	7.84939	8.48588	8.32039	8.04999	8.30938	10.0117
URIAAL_R09589	9.09604	9.30082	9.64117	9.17791	9.60066	9.45626
URIAAL_R05113	4.36355	9.09351	4.36355	5.2166	4.36355	4.36355
URIAAL_R05114	4.73823	5.31923	5.87619	5.32696	4.36355	5.41495
URIAAL_R09571	4.36355	4.94647	5.14539	4.36355	4.36355	4.36355
URIAAL_R05088	4.36355	4.36355	4.36355	4.82423	4.79084	4.36355
URIAAL_R05115	4.36355	4.36355	4.36355	4.36355	4.36355	4.36355
URIAAL_R05116	4.36355	5.72032	4.36355	5.15491	5.15586	4.76846
URIAAL_R09583	11.0678	10.6194	10.4793	10.9606	10.6526	10.7629
URIAAL_R14717	13.422	12.1908	13.2071	12.2996	13.2863	12.5528
URIAAL_R05096	14.5293	13.4807	14.9826	15.3783	14.3487	13.1933
URIAAL_R09572	4.36355	4.36355	4.36355	4.36355	4.36355	4.36355
URIAAL_R09594	12.8221	12.7967	12.6723	12.4624	13.291	12.268
URIAAL_R05117	9.87425	10.2987	10.4337	9.79527	10.6905	9.99105
URIAAL_R05118	10.0837	9.87926	9.9702	9.13232	9.63409	10.931
URIAAL_R05097	8.45094	7.82989	8.45431	8.09	7.85896	7.88805
URIAAL_R05126	9.11799	9.18513	10.0384	8.98013	9.5455	9.2355
URIAAL_R09570	6.03145	5.50716	6.08699	5.63096	6.22107	6.03865
URIAAL_R05119	10.5291	11.0352	11.0635	10.4292	11.011	10.9849
URIAAL_R05120	10.6368	10.7852	10.7103	10.3175	10.5859	10.707
URIAAL_R09590	10.6368	10.7733	10.889	10.4247	11.0835	11.0777
URIAAL_R09592	9.88495	10.3133	10.6624	10.0149	10.7442	10.4576
URIAAL_R05104	5.71901	5.89754	6.6111	5.89349	6.73207	6.51105
URIAAL_R09584	6.70213	6.20457	6.54572	6.65048	7.18566	7.03314
URIAAL_R05121	4.36355	4.36355	4.36355	4.36355	4.36355	4.36355
URIAAL_R09585	4.36355	4.36355	4.36355	6.05654	4.36355	4.36355
URIAAL_R04469	7.3722	7.25282	6.17984	8.36126	5.99125	7.31559
URIAAL_R15110	5.71901	5.69246	5.07869	5.2166	5.2091	5.45023
URIAAL_R13609	5.40361	5.57283	5.65245	6.24417	5.03553	5.37823
URIAAL_R04404	4.36355	4.36355	4.36355	6.00468	4.36355	4.36355
URIAAL_R04365	5.26897	6.32502	5.61625	6.86952	4.36355	5.06039
URIAAL_R13527	4.36355	4.36355	4.8186	5.66754	4.36355	4.36355
URIAAL_R13526	6.24971	6.94121	6.28682	7.0813	5.91999	7.04233
URIAAL_R04417	13.1395	12.3005	12.9622	12.4221	12.9298	12.5089
URIAAL_R04406	16.5495	14.9904	15.5606	16.9009	15.6479	14.7958
URIAAL_R04418	12.9017	12.7972	13.0873	12.8739	12.963	13.1588
URIAAL_R13562	12.8266	12.6956	13.0275	12.1098	13.0022	12.5018
URIAAL_R04366	8.77986	8.93157	9.07163	8.65905	8.56369	10.2984
URIAAL_R14913	6.4353	7.63776	8.048	7.12672	8.10906	7.20616
URIAAL_R13528	8.49642	8.72304	7.65974	8.30903	7.71519	8.07986
URIAAL_R13529	10.6304	10.8011	10.6933	10.1339	10.9788	10.6362
URIAAL_R04419	4.36355	4.65649	4.8186	5.89349	5.3921	4.36355
URIAAL_R13530	6.66125	6.66863	6.4769	6.40713	5.96798	6.01862
URIAAL_R13531	12.1551	11.2841	12.3257	12.231	11.7332	11.7997
URIAAL_R13563	12.5103	12.0469	12.3949	11.7644	12.3004	12.1209
URIAAL_R04367	5.26897	4.86922	5.2628	5.51246	4.36355	4.36355
URIAAL_R13564	4.36355	4.36355	4.36355	4.36355	4.36355	4.36355
URIAAL_R13532	4.36355	4.36355	4.36355	4.36355	4.36355	4.36355
URIAAL_R13565	6.06515	4.65649	5.3155	5.73705	4.66624	5.25757
URIAAL_R04368	7.79556	9.24515	8.47546	7.4799	7.91481	8.18122
URIAAL_R13566	10.3993	12.2191	10.7857	10.7147	10.6502	9.36269
URIAAL_R13567	6.83614	7.34027	6.74736	6.99803	6.55395	6.05834
URIAAL_R13568	4.36355	4.36355	4.36355	5.2166	5.09837	4.36355
URIAAL_R13569	4.36355	5.60408	4.8186	4.92659	4.36355	4.36355
URIAAL_R04369	8.29227	7.9449	9.36868	8.29445	7.90381	8.25278
URIAAL_R13612	4.36355	4.86922	4.68598	4.36355	4.36355	4.36355
URIAAL_R13533	5.76322	7.4865	7.63723	6.75716	6.447	7.92268
URIAAL_R04370	10.6999	10.4077	10.2744	10.8515	9.9714	10.9691
URIAAL_R13570	11.1249	10.9314	10.9377	11.3268	10.7887	10.8324
URIAAL_R13534	11.7998	12.4075	12.7026	12.0097	12.3048	11.9346
URIAAL_R04420	12.6845	12.8272	13.1785	12.5194	13.3749	13.0628
URIAAL_R04402	8.88179	9.96662	9.54866	10.1925	8.94614	9.27218
URIAAL_R13556	10.8977	10.7421	12.1911	10.7264	11.443	11.7921
URIAAL_R04421	7.88418	10.1851	8.30629	9.30903	8.79747	8.48494
URIAAL_R04422	12.6152	11.9558	12.7335	12.2525	12.1907	12.5279
URIAAL_R04371	8.81165	9.09801	8.28726	8.63229	9.16338	9.08949
URIAAL_R04372	8.4567	9.05007	8.40665	9.91405	9.09535	9.79681
URIAAL_R04413	5.6246	5.27621	5.57869	6.08164	5.84398	5.9349
URIAAL_R04373	11.866	11.773	12.0419	12.8177	12.1913	12.019
URIAAL_R04374	8.77986	6.70588	7.86065	8.50739	6.81897	9.85521
URIAAL_R13559	4.36355	4.36355	4.36355	4.68999	4.36355	4.65033
URIAAL_R04423	11.1701	11.309	10.7515	12.1607	11.6511	10.8662
URIAAL_R04424	6.4353	7.3632	6.62695	7.93535	6.63915	6.64047
URIAAL_R04403	8.3738	7.12393	6.59505	8.17744	6.3648	6.87709
URIAAL_R14769	8.06166	8.50297	6.97224	9.59842	5.81746	7.03314
URIAAL_R13571	11.4994	11.1194	11.7308	11.7016	11.5356	11.2393
URIAAL_R04375	12.245	12.3496	12.7979	12.7813	12.8981	12.3214
URIAAL_R04397	8.13555	8.66656	7.8147	9.30178	7.90932	8.06667
URIAAL_R04416	4.36355	4.36355	4.36355	4.36355	4.36355	4.36355
URIAAL_R13572	12.0969	11.4431	11.6552	11.4161	11.7343	12.0334
URIAAL_R04425	10.5373	10.6076	9.57431	9.89331	8.89735	10.2057
URIAAL_R13573	11.0084	11.1227	11.0801	11.2059	11.0142	10.8694
URIAAL_R13574	4.36355	4.36355	4.36355	4.36355	4.36355	4.36355
URIAAL_R04376	6.48372	5.36014	6.08699	5.46951	5.2091	5.06039
URIAAL_R13575	10.7156	11.1337	10.7147	11.1186	11.4626	10.5934
URIAAL_R13555	7.26974	6.89943	8.41105	7.90359	8.89183	7.88303
URIAAL_R13535	7.06996	8.72012	6.87104	9.21183	5.86989	6.51105
URIAAL_R04377	10.3384	10.0114	11.1791	10.418	9.91268	10.0567
URIAAL_R04426	10.2285	8.67864	9.261	9.14318	9.03149	9.27028
URIAAL_R04401	5.10677	5.43662	5.8469	6.44481	5.25885	5.63809
URIAAL_R04378	10.503	10.7021	10.2105	10.2463	10.4676	10.4957
URIAAL_R04379	6.7992	7.1058	6.81747	6.99803	6.79471	6.57735
URIAAL_R13576	12.1909	11.9405	10.9752	11.3845	11.7008	11.2971
URIAAL_R13536	4.36355	4.36355	5.00448	4.82423	4.36355	4.76846
URIAAL_R04427	5.19227	5.27621	6.01232	5.01234	5.25885	6.07771
URIAAL_R13618	10.2048	10.3142	10.0623	10.6042	9.70345	11.0982
URIAAL_R13616	4.36355	4.36355	4.36355	4.36355	4.36355	4.36355
URIAAL_R04428	4.89196	5.74747	5.2628	5.08744	5.57771	5.63809
URIAAL_R13537	10.7192	10.9773	9.76797	9.76924	9.86421	10.4349
URIAAL_R04429	9.43592	9.15955	9.1733	8.99819	9.17933	9.06328
URIAAL_R13614	8.29871	10.2112	9.15249	9.0796	9.49907	8.81617
URIAAL_R04430	9.96778	9.81247	9.09909	8.63229	8.96467	9.45626
URIAAL_R04380	12.635	14.2744	12.9221	13.045	14.5616	12.7286
URIAAL_R13538	4.36355	4.77713	4.36355	5.01234	4.66624	4.93434
URIAAL_R04396	4.36355	4.36355	4.36355	4.36355	4.36355	5.06039
URIAAL_R04431	11.4484	11.5794	11.575	11.1207	11.6404	11.7179
URIAAL_R04432	11.5153	9.74816	11.7404	10.8011	11.3082	11.4685
URIAAL_R04381	5.84658	4.77713	5.81682	6.74243	5.54337	6.99577
URIAAL_R04433	7.13004	6.11073	7.62965	7.7547	6.62532	8.31352
URIAAL_R04382	10.9718	11.2129	10.9309	11.2555	11.0312	11.844
URIAAL_R13558	5.46389	6.66863	5.07869	6.38787	6.16259	6.23941
URIAAL_R04434	9.6962	9.91535	9.41091	9.65449	9.71755	10.0545
URIAAL_R04435	5.40361	5.07511	5.65245	6.60201	5.2091	5.91299
URIAAL_R04383	8.08423	8.34128	7.83458	8.79621	8.14679	8.92454
URIAAL_R04384	10.8559	9.80699	9.71575	10.9035	10.0906	10.071
URIAAL_R13539	7.47916	5.89754	6.68852	7.7689	6.59724	7.49853
URIAAL_R13577	8.34299	8.17615	7.23753	9.36805	8.44407	7.84225
URIAAL_R04436	12.0335	11.0164	11.7706	11.4156	11.0841	11.2393
URIAAL_R04437	7.85817	6.40452	7.1967	8.16145	7.61054	7.96601
URIAAL_R04438	8.9281	8.03724	9.01219	8.57321	8.61494	9.17967
URIAAL_R04409	4.36355	5.1825	5.90474	5.55357	5.50778	5.79656
URIAAL_R14914	4.36355	4.36355	4.36355	4.82423	5.09837	5.16567
URIAAL_R04407	7.65127	6.18637	6.15728	6.68185	5.70441	7.1649
URIAAL_R04412	8.61968	8.37139	7.82798	8.89594	8.57063	8.36104
URIAAL_R13578	4.36355	4.36355	5.20637	4.36355	4.36355	4.36355
URIAAL_R13540	5.92413	4.86922	5.41195	4.92659	4.96566	5.66621
URIAAL_R13541	8.62991	7.11489	8.19834	8.51159	7.98949	8.9318
URIAAL_R04385	10.0518	10.167	9.46676	10.2848	10.1564	9.89411
URIAAL_R14912	5.52047	4.36355	4.68598	6.55168	4.88592	5.51699
URIAAL_R14911	4.36355	4.65649	4.8186	5.77018	5.2091	5.213
URIAAL_R04400	7.49056	6.25762	6.80374	7.87765	6.46283	7.45838
URIAAL_R04386	10.3828	10.2092	10.0256	11.1639	10.2628	10.8214
URIAAL_R04408	5.92413	5.01419	5.53966	7.28488	5.3921	6.09678
URIAAL_R14916	4.36355	4.36355	5.36507	4.92659	4.36355	5.60916
URIAAL_R04387	11.7845	10.4041	10.6071	11.2586	11.18	10.7056
URIAAL_R04440	10.36	10.7356	10.5752	10.418	11.0116	10.6288
URIAAL_R04441	6.72212	7.3091	7.00833	7.7689	6.83093	6.88739
URIAAL_R13579	9.8061	9.72074	8.8759	10.3646	9.45858	9.85775
URIAAL_R04442	9.78112	9.6259	9.2731	10.5795	9.6158	9.40155
URIAAL_R13542	7.54619	6.30851	7.34399	7.92273	7.03007	7.48527
URIAAL_R13580	9.79253	9.14658	9.08267	9.42252	8.9138	10.0786
URIAAL_R04443	5.57391	5.9207	5.57869	5.59301	5.79028	5.99825
URIAAL_R13560	11.1012	10.8532	11.9064	11.204	11.5156	11.2825
URIAAL_R04414	11.2616	10.949	10.9232	11.7365	11.4415	10.2017
URIAAL_R04471	7.46767	8.10614	7.88626	7.70385	7.70887	6.91781
URIAAL_R04399	10.9877	10.6969	10.7156	11.1732	10.6296	10.7541
URIAAL_R04388	9.58511	10.3599	10.29	10.6675	10.0316	10.2383
URIAAL_R04474	9.40056	10.9048	9.62239	9.96538	8.84685	9.89658
URIAAL_R13581	11.9102	11.7479	12.3448	12.4783	12.1644	11.4714
URIAAL_R04444	10.0556	10.2571	10.882	10.1622	10.5808	9.70804
URIAAL_R13582	10.1597	8.79411	10.2888	10.9019	9.7651	9.56915
URIAAL_R13543	4.36355	4.65649	4.36355	4.36355	4.36355	4.36355
URIAAL_R13613	4.36355	4.36355	4.36355	4.36355	4.36355	4.36355
URIAAL_R13544	5.6246	4.36355	4.36355	5.27367	4.79084	4.76846
URIAAL_R13545	4.89196	5.23077	5.2628	5.95042	4.36355	4.36355
URIAAL_R04445	4.36355	5.60408	4.36355	5.15491	4.88592	5.11504
URIAAL_R04467	5.52047	5.54055	5.7859	5.77018	5.57771	4.85866
URIAAL_R04470	4.89196	5.89754	4.8186	5.55357	4.36355	5.06039
URIAAL_R04446	7.95948	7.3012	6.76168	7.28488	7.20394	8.06224
URIAAL_R13546	4.36355	4.36355	4.36355	4.68999	4.36355	4.36355
URIAAL_R04405	4.36355	4.36355	4.36355	4.36355	4.36355	4.36355
URIAAL_R13617	4.36355	5.07511	5.00448	4.36355	5.25885	5.06039
URIAAL_R04478	4.36355	4.36355	4.36355	5.51246	4.36355	4.36355
URIAAL_R04448	4.36355	4.36355	4.36355	5.01234	4.36355	4.36355
URIAAL_R13583	10.0016	9.52936	10.6559	10.3978	10.0712	10.4212
URIAAL_R04447	11.4346	11.1473	12.3821	11.757	12.5564	12.9838
URIAAL_R13584	10.6048	10.7284	10.3322	11.0081	10.4851	10.8574
URIAAL_R13547	5.88602	5.07511	5.53966	6.48142	6.25857	6.36733
URIAAL_R13548	5.76322	4.36355	6.11088	6.03089	5.2091	5.213
URIAAL_R13585	4.36355	4.36355	4.36355	4.36355	4.36355	4.36355
URIAAL_R13586	4.36355	4.36355	4.36355	5.70287	4.36355	4.36355
URIAAL_R04389	8.20581	8.18466	8.39337	8.46466	8.76156	8.22142
URIAAL_R13587	6.97461	6.61728	6.36628	8.67786	6.27691	6.42675
URIAAL_R04390	12.1648	12.0044	12.386	11.4289	12.4629	11.8887
URIAAL_R04449	4.36355	4.94647	5.2628	5.01234	5.47081	5.06039
URIAAL_R13549	7.65127	8.33365	8.81424	6.93529	6.85456	7.7404
URIAAL_R04410	4.36355	4.36355	4.36355	4.36355	4.36355	4.36355
URIAAL_R13557	4.36355	4.36355	4.8186	4.36355	4.36355	4.36355
URIAAL_R13588	6.81779	6.18637	6.78986	5.70287	6.41475	6.80275
URIAAL_R13589	12.67	12.8291	12.9736	12.114	12.8115	13.1853
URIAAL_R13615	11.4331	11.7164	11.8172	11.0184	11.5671	11.1787
URIAAL_R04450	9.51796	9.29692	9.42399	9.29449	9.10254	9.2433
URIAAL_R13554	5.71901	4.77713	5.00448	5.15491	5.3921	5.25757
URIAAL_R13610	6.4353	8.18041	8.81092	7.94162	8.06539	7.81087
URIAAL_R13607	7.32191	8.25908	8.86953	8.12892	8.24568	8.1934
URIAAL_R04451	10.0613	10.1945	10.8717	10.5944	10.9677	10.68
URIAAL_R13590	4.36355	4.36355	5.00448	4.36355	4.36355	4.93434
URIAAL_R04452	4.36355	4.94647	5.14539	5.01234	4.36355	4.85866
URIAAL_R13591	4.36355	4.36355	4.36355	4.36355	4.36355	4.36355
URIAAL_R13592	8.60937	9.23089	8.66406	8.38896	8.84399	8.86253
URIAAL_R13550	4.36355	5.07511	4.36355	4.36355	4.36355	4.76846
URIAAL_R04411	7.42075	7.67469	7.80801	7.44478	6.39831	7.59415
URIAAL_R13593	6.90714	6.93089	7.70371	6.10623	6.3128	5.79656
URIAAL_R13594	5.52047	5.77394	5.49899	5.37708	5.30566	6.48356
URIAAL_R13551	8.25302	8.27909	7.33464	7.69644	7.38257	8.13986
URIAAL_R04453	7.02311	6.37331	7.61436	5.27367	7.42968	5.84459
URIAAL_R04398	11.1543	11.202	11.1976	10.7865	11.2013	11.2207
URIAAL_R13611	4.36355	4.36355	4.36355	5.01234	5.09837	4.36355
URIAAL_R13595	5.26897	4.36355	5.49899	5.27367	4.36355	4.36355
URIAAL_R04454	4.36355	4.36355	4.68598	5.01234	4.36355	4.36355
URIAAL_R04473	4.36355	4.36355	4.36355	4.36355	4.36355	4.36355
URIAAL_R04476	4.36355	4.36355	4.36355	4.36355	4.36355	4.36355
URIAAL_R04477	4.36355	4.36355	4.36355	4.36355	4.36355	4.36355
URIAAL_R04455	4.36355	4.36355	4.36355	5.32696	4.36355	4.36355
URIAAL_R13561	4.89196	5.27621	6.36628	4.36355	5.30566	4.36355
URIAAL_R04456	10.6431	11.1127	10.6476	10.4609	11.0872	10.1977
URIAAL_R13608	9.22298	9.39517	9.58211	8.11237	9.54725	8.80302
URIAAL_R04457	4.36355	4.36355	4.36355	4.36355	4.36355	4.76846
URIAAL_R04458	7.74908	7.91956	7.82136	7.53097	8.04554	9.00019
URIAAL_R13596	9.98379	9.98128	9.28749	9.4314	8.77363	10.0287
URIAAL_R04475	6.61906	6.70588	7.34399	7.28488	6.5392	7.4786
URIAAL_R04472	5.26897	5.72032	5.72127	5.73705	5.86989	5.74631
URIAAL_R04391	4.36355	5.54055	6.1343	5.46951	5.09837	5.54868
URIAAL_R04392	9.40056	9.36378	9.35508	9.30178	9.05639	9.97592
URIAAL_R04393	10.3384	10.5717	9.98645	9.88364	10.3428	10.5919
URIAAL_R04459	4.36355	4.36355	4.8186	4.68999	4.36355	4.36355
URIAAL_R04460	4.36355	4.36355	4.36355	4.36355	4.36355	4.36355
URIAAL_R04394	4.36355	5.07511	4.36355	4.68999	4.79084	5.00069
URIAAL_R04461	4.36355	4.36355	4.36355	4.36355	4.36355	4.36355
URIAAL_R13597	4.36355	4.36355	4.36355	4.36355	4.36355	4.36355
URIAAL_R13598	11.1719	10.9705	12.2372	11.7365	11.0968	10.7224
URIAAL_R13599	10.4098	9.64905	9.5918	10.4158	10.7381	9.06328
URIAAL_R04395	10.9124	11.2757	10.5888	11.2404	11.0499	11.4522
URIAAL_R04415	10.8005	10.035	10.1736	10.776	10.6849	10.2796
URIAAL_R04468	7.40877	8.38252	7.77409	8.01477	7.48271	7.71799
URIAAL_R13552	5.88602	5.98752	6.1343	5.86392	7.03007	6.72407
URIAAL_R13553	11.5792	11.7709	11.49	12.0462	11.3975	11.7304
URIAAL_R04462	7.69121	7.73999	7.75334	7.57217	6.9006	8.44143
URIAAL_R13600	14.7969	14.2045	14.6454	14.3184	14.2461	13.9192
URIAAL_R13601	8.06922	8.40453	7.74636	9.06539	8.55672	8.13986
URIAAL_R04463	11.2787	11.4023	11.5233	11.3088	11.3404	11.4191
URIAAL_R04464	4.36355	4.36355	4.36355	5.37708	4.96566	4.36355
URIAAL_R14915	4.36355	4.36355	4.36355	5.15491	4.36355	4.36355
URIAAL_R13602	5.6246	5.82504	6.87104	6.10623	5.70441	5.06039
URIAAL_R13603	13.3497	12.8552	12.9136	12.5426	13.4659	13.5301
URIAAL_R04465	4.36355	4.36355	5.36507	4.36355	4.36355	4.36355
URIAAL_R04466	10.1667	11.6682	10.2029	10.6013	10.6046	10.4152
URIAAL_R13604	6.74181	8.93911	7.64477	8.50317	8.46657	6.59022
URIAAL_R13605	11.4783	11.3326	11.7968	10.6562	11.8134	11.3395
URIAAL_R13606	5.71901	5.1825	5.65245	5.37708	5.47081	5.66621
URIAAL_R10717	4.36355	4.36355	4.8186	5.15491	4.36355	4.36355
URIAAL_R10719	7.06996	7.9549	7.20702	8.22438	7.85896	8.42777
URIAAL_R10720	10.4289	10.7698	10.3878	12.1644	10.9259	10.7342
URIAAL_R09779	4.36355	4.36355	4.36355	5.01234	4.36355	4.76846
URIAAL_R10722	4.36355	4.36355	4.36355	5.15491	4.79084	4.65033
URIAAL_R10709	4.36355	4.36355	4.36355	4.36355	4.36355	4.36355
URIAAL_R10710	8.17812	8.11062	7.46017	8.45596	8.16987	8.65863
URIAAL_R09766	4.89196	4.65649	4.68598	4.36355	4.36355	4.76846
URIAAL_R10716	4.36355	4.36355	4.36355	4.36355	4.36355	4.36355
URIAAL_R10721	4.36355	4.36355	4.36355	4.68999	4.36355	4.36355
URIAAL_R09771	4.36355	4.36355	4.36355	5.15491	4.36355	4.36355
URIAAL_R09769	4.36355	4.36355	4.36355	4.36355	4.79084	4.36355
URIAAL_R09768	4.36355	4.77713	4.36355	4.36355	4.36355	4.76846
URIAAL_R09772	4.36355	4.36355	4.36355	4.36355	4.79084	4.65033
URIAAL_R09773	4.36355	5.87389	4.36355	5.77018	5.64302	4.36355
URIAAL_R09774	8.41585	12.1897	7.48567	10.1285	9.55775	6.71244
URIAAL_R10723	13.1246	12.4181	13.3147	13.1613	12.8009	11.5988
URIAAL_R09775	11.6417	11.6674	12.4231	12.0724	12.986	12.0042
URIAAL_R09770	4.89196	5.01419	4.36355	5.37708	5.09837	5.25757
URIAAL_R10724	10.9393	10.5749	11.2371	10.8366	10.3886	11.1132
URIAAL_R10729	11.6423	10.5709	11.9827	11.622	11.0306	10.0916
URIAAL_R10718	6.66125	6.32502	5.93259	7.05802	5.34997	6.15223
URIAAL_R10731	6.22081	5.84973	5.61625	6.36831	5.79028	5.89065
URIAAL_R10725	8.73791	8.79411	9.24388	9.24244	8.75549	8.5431
URIAAL_R10711	5.10677	6.00896	6.54572	6.03089	5.47081	5.54868
URIAAL_R09765	7.30905	6.96164	6.28682	7.14888	6.83093	6.60296
URIAAL_R10726	4.73823	5.01419	5.2628	5.80232	4.96566	5.00069
URIAAL_R10727	5.6246	5.50716	5.61625	5.37708	5.2091	5.72028
URIAAL_R10728	11.5466	11.344	11.172	12.6252	11.638	10.3864
URIAAL_R10730	11.1003	11.6025	10.9483	12.3044	11.4538	10.3363
URIAAL_R10712	9.12523	8.93911	8.47126	10.3401	9.66515	9.16537
URIAAL_R09767	10.3117	10.7233	10.338	11.9703	10.1633	9.7768
URIAAL_R09777	6.4353	6.29177	6.76168	7.46245	6.80689	6.15223
URIAAL_R09778	9.79706	10.4671	9.7281	9.89492	10.238	9.52345
URIAAL_R10713	6.66125	7.82989	7.59111	7.82432	8.40963	6.98626
URIAAL_R10714	11.5371	12.1741	11.9575	11.8505	12.3675	11.9066
URIAAL_R09776	5.84658	5.84973	6.06262	5.70287	6.33037	7.23832
URIAAL_R10715	4.89196	4.77713	5.00448	5.15491	4.36355	5.66621
URIAAL_R08464	10.7108	11.1489	10.4022	10.5318	11.1141	10.2682
URIAAL_R07983	4.36355	4.36355	4.36355	4.36355	4.36355	4.36355
URIAAL_R12641	7.55706	7.45135	7.51896	7.20277	7.61731	8.6321
URIAAL_R07960	5.00894	6.57741	5.87619	5.73705	6.20188	5.63809
URIAAL_R07961	5.00894	7.61893	5.68743	8.94952	5.99125	6.49737
URIAAL_R12649	6.35905	8.63282	6.15728	9.4599	5.47081	5.89065
URIAAL_R12668	4.36355	4.36355	4.36355	4.82423	4.36355	4.36355
URIAAL_R07962	4.36355	4.36355	4.36355	5.15491	4.36355	4.36355
URIAAL_R12667	4.36355	4.36355	4.36355	4.36355	4.36355	4.36355
URIAAL_R07982	4.73823	4.36355	4.36355	4.36355	4.36355	4.36355
URIAAL_R07981	4.36355	4.36355	4.36355	4.36355	4.36355	4.36355
URIAAL_R12666	5.57391	4.94647	5.00448	5.32696	4.36355	4.76846
URIAAL_R12665	14.9361	14.176	15.3868	14.6182	14.5249	13.7612
URIAAL_R12642	7.77715	6.88878	8.43284	7.71857	9.64233	7.70095
URIAAL_R12664	7.44441	6.09106	7.89259	6.96073	8.25434	7.67791
URIAAL_R14595	5.10677	4.94647	4.36355	5.27367	5.54337	4.85866
URIAAL_R07980	6.61906	7.65018	7.14391	6.10623	6.66636	6.17017
URIAAL_R12643	11.1867	11.0875	11.6741	11.5464	11.6156	10.7825
URIAAL_R12663	9.86348	9.97885	9.44553	8.29933	10.2628	10.0377
URIAAL_R12662	13.5802	13.4383	13.7284	13.3662	14.0998	13.2171
URIAAL_R07979	5.33896	5.50716	6.03774	5.2166	5.50778	4.76846
URIAAL_R12661	5.26897	4.36355	5.41195	5.59301	4.79084	4.65033
URIAAL_R07978	4.73823	4.36355	4.36355	5.70287	5.25885	5.00069
URIAAL_R12660	6.19123	7.45135	7.46017	7.44478	7.41415	6.93772
URIAAL_R07977	11.6821	11.1027	11.4655	11.338	10.8144	9.97826
URIAAL_R07976	5.57391	5.01419	5.20637	5.46951	5.57771	5.4842
URIAAL_R07975	4.36355	4.77713	4.8186	4.36355	4.36355	4.85866
URIAAL_R12659	4.36355	5.79979	4.36355	5.01234	4.96566	4.36355
URIAAL_R12658	4.73823	7.45845	5.14539	5.32696	5.03553	4.36355
URIAAL_R07974	10.3616	11.6925	11.214	10.7065	11.1549	9.70522
URIAAL_R12657	9.12523	9.33169	9.44767	9.92823	9.00616	8.53357
URIAAL_R12656	4.36355	4.36355	4.36355	4.36355	4.36355	4.36355
URIAAL_R07964	4.36355	4.36355	4.36355	4.36355	4.36355	4.36355
URIAAL_R15197	4.89196	4.36355	5.00448	5.01234	4.36355	5.213
URIAAL_R12644	5.26897	5.1825	5.41195	5.46951	4.96566	5.11504
URIAAL_R07963	4.36355	4.36355	4.36355	5.01234	4.66624	4.36355
URIAAL_R15196	4.36355	4.36355	4.36355	4.36355	4.36355	4.36355
URIAAL_R07973	7.29607	6.18637	5.57869	6.56867	5.94423	6.51105
URIAAL_R12655	6.64032	7.23631	7.30621	6.24417	7.16715	7.0962
URIAAL_R12645	4.36355	4.36355	4.36355	4.36355	4.36355	4.36355
URIAAL_R12646	4.36355	4.36355	4.36355	5.15491	4.36355	4.36355
URIAAL_R07972	4.36355	4.36355	4.36355	5.01234	4.36355	4.36355
URIAAL_R07971	4.36355	4.36355	4.36355	4.36355	4.79084	4.36355
URIAAL_R12647	10.5373	10.4792	10.5072	10.66	10.3569	10.0949
URIAAL_R07965	9.01647	9.34877	9.29937	9.10481	9.69714	9.43938
URIAAL_R07970	8.03872	8.50636	8.03091	7.8711	8.63162	8.41397
URIAAL_R12640	11.564	12.3278	13.1026	11.8945	12.765	12.696
URIAAL_R07959	5.67288	4.77713	5.90474	5.15491	5.47081	5.79656
URIAAL_R12648	4.36355	4.36355	5.14539	4.36355	4.36355	4.36355
URIAAL_R12654	4.36355	5.13086	4.36355	4.82423	4.36355	4.36355
URIAAL_R12653	11.9294	11.7877	11.6681	11.5857	12.233	11.5391
URIAAL_R07967	4.89196	4.86922	4.68598	4.36355	4.96566	5.213
URIAAL_R12669	5.40361	6.24019	5.68743	6.17714	6.07998	5.9349
URIAAL_R12652	9.14675	9.0243	8.59234	9.06254	8.86388	9.06107
URIAAL_R07969	11.5056	11.7084	12.7117	12.7124	11.5826	10.9543
URIAAL_R07968	10.7616	11.2733	11.403	9.98661	11.2715	11.68
URIAAL_R12639	11.4052	11.5854	12.1125	11.348	11.656	11.9213
URIAAL_R07958	4.89196	4.36355	4.36355	4.36355	4.79084	4.36355
URIAAL_R07957	4.36355	4.36355	4.36355	4.36355	4.36355	4.36355
URIAAL_R07956	4.36355	4.36355	5.14539	4.36355	4.36355	4.36355
URIAAL_R12638	5.10677	4.36355	4.36355	5.37708	5.2091	4.93434
URIAAL_R12651	5.26897	5.31923	5.53966	4.36355	4.96566	5.72028
URIAAL_R12650	6.92432	7.17693	7.76721	7.20277	7.18566	7.26195
URIAAL_R06066	8.19204	8.47899	8.75673	8.67412	8.46657	8.8266
URIAAL_R06106	11.4331	11.4127	11.8583	11.9207	12.003	11.6846
URIAAL_R09012	9.23642	7.8675	8.2236	9.79527	7.61731	7.98952
URIAAL_R09047	10.2682	9.74959	9.43695	10.07	9.31544	10.5758
URIAAL_R09053	4.36355	4.36355	4.36355	4.36355	4.36355	4.76846
URIAAL_R06065	10.1632	9.4079	9.58793	9.65069	10.3101	9.57842
URIAAL_R09054	6.06515	6.37331	4.36355	6.40713	5.79028	5.72028
URIAAL_R09011	9.49019	9.7149	9.36189	10.7752	10.0278	10.6604
URIAAL_R09050	10.0075	9.54096	9.02657	9.69192	9.74993	9.24718
URIAAL_R06137	4.73823	6.13008	5.75407	5.80232	4.79084	5.54868
URIAAL_R06064	8.78444	7.44421	7.50241	8.15608	8.07521	8.55884
URIAAL_R06055	8.98097	9.05702	8.51277	9.72298	8.89735	8.87012
URIAAL_R06107	10.2958	10.5894	10.4283	11.7212	10.9963	10.9328
URIAAL_R15324	8.33048	8.28305	8.20343	8.90235	8.50694	8.88766
URIAAL_R06108	5.71901	4.77713	5.61625	4.68999	5.03553	5.33991
URIAAL_R06109	9.24309	8.69359	8.53711	8.98919	8.02034	8.69041
URIAAL_R06056	8.05405	8.39723	7.48567	8.15069	7.48271	7.67791
URIAAL_R06057	9.83286	10.1269	10.2636	10.1912	10.3768	10.2777
URIAAL_R06058	4.36355	4.36355	4.36355	4.36355	4.96566	4.36355
URIAAL_R09087	4.36355	4.36355	4.36355	4.36355	4.36355	5.16567
URIAAL_R09010	7.28297	6.20457	6.52885	7.62789	7.04033	6.15223
URIAAL_R09083	4.36355	5.27621	4.91973	4.36355	4.88592	5.25757
URIAAL_R06060	9.43592	8.89842	8.96818	8.33301	7.97906	8.63507
URIAAL_R06062	7.78638	8.09263	8.13584	8.85357	7.87594	7.76792
URIAAL_R06063	4.73823	4.77713	5.07869	5.86392	5.2091	5.57938
URIAAL_R06061	11.5405	11.1348	11.8368	11.4699	11.2047	11.4998
URIAAL_R09055	7.13004	7.6686	8.65667	7.97256	7.25736	7.4786
URIAAL_R06073	5.10677	5.43662	6.51176	6.40713	6.22107	6.7356
URIAAL_R06110	10.7604	11.0779	11.6301	11.848	11.3082	10.9152
URIAAL_R09056	4.36355	4.36355	4.36355	6.15396	4.96566	4.36355
URIAAL_R09057	5.6246	4.36355	4.36355	5.32696	4.36355	4.36355
URIAAL_R09081	4.36355	4.36355	4.36355	6.17714	4.36355	4.36355
URIAAL_R06130	6.30557	5.23077	5.4565	7.28488	5.03553	5.91299
URIAAL_R09040	6.94129	5.94341	6.73289	7.29481	5.34997	5.74631
URIAAL_R09085	7.58917	9.51263	7.1967	9.27981	6.20188	6.81363
URIAAL_R09037	9.57193	8.31052	9.68891	9.91721	9.20849	8.60809
URIAAL_R06067	10.7823	10.5838	10.6195	10.949	11.1857	10.4442
URIAAL_R06068	7.49056	8.13719	8.0871	8.07299	7.24859	7.15649
URIAAL_R06069	7.03891	6.44995	6.17984	7.14888	6.20188	6.64047
URIAAL_R06070	9.03582	7.12393	8.79083	10.3611	8.06539	7.9421
URIAAL_R06111	11.0133	10.7866	11.1473	10.462	10.9645	11.6637
URIAAL_R09058	15.8101	14.7587	16.2386	15.7654	15.0427	13.851
URIAAL_R06112	11.6214	10.9809	11.5449	11.5279	11.264	11.5595
URIAAL_R09041	14.314	13.6678	13.9209	14.6939	14.0953	13.9751
URIAAL_R06071	11.9711	11.9427	12.2148	12.2727	12.3997	11.8665
URIAAL_R09059	4.36355	4.86922	4.68598	5.46951	4.66624	4.76846
URIAAL_R06132	11.2657	10.9086	11.0311	10.5573	10.9486	11.1628
URIAAL_R06072	10.08	10.5652	10.6642	10.6439	10.5868	10.3607
URIAAL_R06113	5.76322	6.27481	6.06262	5.70287	5.96798	6.03865
URIAAL_R06114	6.09792	5.36014	6.08699	5.46951	4.96566	5.37823
URIAAL_R06115	7.92651	8.0652	8.05928	7.49713	7.93115	8.05781
URIAAL_R06116	4.89196	4.36355	5.00448	4.82423	4.36355	5.00069
URIAAL_R09060	5.71901	5.94341	6.06262	5.77018	5.2091	5.60916
URIAAL_R09061	4.36355	4.36355	4.36355	4.36355	4.36355	4.36355
URIAAL_R09062	4.73823	5.43662	5.00448	5.08744	4.36355	4.76846
URIAAL_R09063	5.96101	4.65649	4.36355	4.36355	4.36355	5.06039
URIAAL_R09036	11.3005	11.2365	11.1881	11.0073	11.208	11.4928
URIAAL_R06117	9.75803	10.1291	9.89706	9.29935	9.84435	9.59832
URIAAL_R09064	7.08523	6.29177	6.67339	6.88293	6.55395	6.45547
URIAAL_R09065	8.48518	8.71133	9.39328	9.09646	7.90381	7.3888
URIAAL_R09039	9.56928	9.59602	9.4583	9.66582	9.95826	9.97826
URIAAL_R09035	8.26622	7.72834	7.41662	8.48618	8.29687	8.89015
URIAAL_R06118	8.06922	7.9093	7.79454	9.06825	7.81851	8.76555
URIAAL_R06098	10.8743	10.5374	10.6978	11.0475	10.696	10.8956
URIAAL_R09052	5.26897	5.54055	5.7859	5.27367	5.54337	6.11555
URIAAL_R14824	11.5988	10.6798	11.5891	9.53392	11.4249	12.0053
URIAAL_R09072	10.3022	9.55574	10.7023	9.15396	9.68443	11.5735
URIAAL_R14822	4.36355	4.36355	4.36355	5.37708	5.2091	4.36355
URIAAL_R06074	10.7023	10.4274	10.129	10.2133	10.6761	10.7589
URIAAL_R09013	7.3722	7.3091	6.95999	8.62843	7.96855	8.61413
URIAAL_R09014	10.2845	10.7831	10.1422	10.4941	10.9717	10.4618
URIAAL_R09082	6.92432	10.3162	8.38892	8.46031	7.92028	7.51166
URIAAL_R09015	11.4273	11.9318	11.3279	11.1193	11.9171	11.7421
URIAAL_R09048	8.02322	7.93482	7.1863	8.70746	7.42194	8.08859
URIAAL_R09073	5.19227	4.77713	5.14539	6.19989	5.09837	5.41495
URIAAL_R09016	4.36355	4.36355	4.36355	5.15491	4.36355	4.36355
URIAAL_R09074	12.4916	12.7502	12.6395	12.3496	12.828	12.5026
URIAAL_R06075	9.57458	10.107	9.71042	9.90611	9.35409	10.1184
URIAAL_R09017	11.552	11.2492	11.6859	11.258	11.8383	11.5509
URIAAL_R09075	11.1693	10.8951	10.4594	10.8433	10.973	10.6108
URIAAL_R06133	8.05405	7.72834	7.74636	7.64341	7.37457	6.99577
URIAAL_R09018	4.73823	5.07511	4.36355	5.63096	4.79084	4.36355
URIAAL_R09019	12.6023	10.4601	11.2993	12.9976	10.1121	11.6169
URIAAL_R09049	11.3933	10.4826	10.5286	10.9946	10.8813	10.9298
URIAAL_R09076	8.64512	8.78855	8.90421	8.46899	8.33	8.2489
URIAAL_R09020	9.00474	7.52755	8.02517	8.46466	7.5969	7.52467
URIAAL_R09077	10.5223	10.5846	10.4509	10.6572	10.4769	10.3189
URIAAL_R09078	6.38498	5.54055	6.1343	6.58545	5.61089	6.05834
URIAAL_R06125	11.8773	12.0912	11.6594	11.647	11.8447	11.821
URIAAL_R06136	4.36355	4.77713	5.00448	6.03089	4.79084	4.36355
URIAAL_R06126	4.73823	5.07511	4.36355	4.82423	4.79084	4.36355
URIAAL_R06127	5.52047	5.23077	5.14539	5.92231	5.2091	5.16567
URIAAL_R09079	10.6656	10.6548	10.713	10.449	10.5024	10.2548
URIAAL_R09021	5.40361	6.09106	4.91973	7.2648	5.86989	5.86786
URIAAL_R06078	9.83948	9.89225	9.5645	10.0981	9.76661	9.84115
URIAAL_R06079	5.96101	6.22251	6.51176	6.38787	6.95605	6.32086
URIAAL_R06076	10.0556	10.899	10.3766	9.87227	10.5833	10.3317
URIAAL_R06077	6.35905	8.3899	7.06646	7.02234	6.9006	6.86672
URIAAL_R06134	9.2196	9.51934	9.77479	9.41806	9.63739	9.48285
URIAAL_R09084	5.80569	6.22251	6.03774	6.13033	5.3921	5.82084
URIAAL_R09022	5.10677	4.65649	5.2628	4.36355	5.54337	5.33991
URIAAL_R09080	10.3813	10.3913	10.1103	10.3175	10.024	10.0231
URIAAL_R06080	4.36355	4.94647	4.8186	6.53447	5.03553	5.00069
URIAAL_R06128	11.306	10.9797	10.6109	11.5626	10.77	10.8142
URIAAL_R09046	9.33651	10.2461	9.17846	9.38872	9.81842	9.7304
URIAAL_R06081	10.8262	11.2222	11.0814	11.0396	11.358	11.4022
URIAAL_R09023	12.6023	12.4417	12.8987	12.8782	12.9142	12.978
URIAAL_R09024	6.59745	5.01419	5.53966	6.69725	5.94423	6.82441
URIAAL_R09025	5.00894	4.77713	4.91973	6.30777	4.79084	4.36355
URIAAL_R14825	11.6227	10.5216	11.6249	11.348	11.0008	10.6626
URIAAL_R06129	4.36355	4.36355	4.36355	5.01234	4.88592	4.36355
URIAAL_R06102	4.36355	4.36355	4.8186	4.82423	4.36355	4.36355
URIAAL_R06103	4.36355	4.36355	4.36355	5.15491	4.36355	4.36355
URIAAL_R06100	4.36355	4.36355	4.36355	4.36355	4.88592	4.36355
URIAAL_R09026	8.11378	7.16823	7.38982	11.3004	6.94514	6.03865
URIAAL_R09045	12.8368	12.293	12.7783	13.0217	13.9081	11.898
URIAAL_R06082	6.30557	5.74747	6.73289	5.77018	6.58297	5.97751
URIAAL_R09086	10.9475	10.7726	10.7209	11.5341	11.4495	10.6749
URIAAL_R09044	5.10677	4.86922	4.36355	5.83355	5.67416	4.85866
URIAAL_R09038	8.52413	7.3632	8.51685	10.4931	8.55672	9.04106
URIAAL_R06083	9.47044	9.29692	9.46676	9.4091	9.47713	9.32827
URIAAL_R06105	8.83394	7.68075	6.85785	8.46031	7.95264	8.641
URIAAL_R06104	5.52047	5.01419	5.07869	6.72754	5.43231	5.06039
URIAAL_R06135	11.6348	11.1978	11.5735	11.4923	11.5983	11.5781
URIAAL_R09027	8.02322	7.58049	8.04232	9.07109	8.21495	7.93727
URIAAL_R09028	8.79357	8.50636	8.20343	9.80213	8.17445	8.54626
URIAAL_R09043	4.89196	5.63439	4.36355	5.08744	4.36355	4.36355
URIAAL_R06087	7.15913	7.08743	7.80801	7.62789	6.9006	6.97669
URIAAL_R06059	7.02311	6.6432	5.72127	7.22376	5.61089	5.84459
URIAAL_R06088	5.67288	7.16823	6.77585	6.96073	7.16715	6.61558
URIAAL_R09071	6.50727	6.22251	5.87619	6.93529	6.41475	5.99825
URIAAL_R06089	12.5893	12.2434	12.7194	12.4825	12.9309	12.095
URIAAL_R06084	7.15913	7.50032	7.73934	7.57217	7.95797	7.82664
URIAAL_R06085	5.84658	6.43499	7.03188	5.89349	6.3648	8.05781
URIAAL_R06086	11.1815	11.3562	11.2364	11.4128	12.1615	11.1873
URIAAL_R06090	12.5685	13.5147	13.4336	13.2263	12.8949	12.4467
URIAAL_R14686	4.36355	4.36355	4.8186	6.00468	4.96566	5.25757
URIAAL_R09029	6.06515	5.74747	5.87619	5.89349	6.16259	6.25613
URIAAL_R06091	10.8743	11.0122	11.3831	11.7644	11.5506	11.1918
URIAAL_R09070	8.66516	8.87501	8.51277	8.21408	9.12859	9.22765
URIAAL_R09069	4.89196	5.50716	5.3155	4.82423	5.34997	5.29977
URIAAL_R09088	6.50727	6.71807	6.57881	5.2166	6.25857	6.32086
URIAAL_R06092	9.44173	9.87533	9.22407	9.62189	9.38977	9.50735
URIAAL_R09030	10.9526	11.3071	10.6214	10.8891	10.9782	10.7466
URIAAL_R06093	5.52047	5.69246	5.8469	6.53447	5.2091	5.37823
URIAAL_R09031	4.89196	4.36355	4.8186	5.70287	4.79084	4.36355
URIAAL_R06124	9.5613	9.26528	9.43264	10.5725	9.22834	9.61194
URIAAL_R15417	6.09792	6.18637	5.90474	5.37708	5.2091	5.33991
URIAAL_R06123	4.36355	5.07511	4.36355	4.92659	4.79084	4.85866
URIAAL_R09032	4.89196	4.77713	4.36355	4.68999	4.36355	4.93434
URIAAL_R15323	4.36355	4.36355	4.36355	4.36355	4.36355	5.16567
URIAAL_R15325	5.26897	4.36355	4.36355	5.01234	5.25885	5.29977
URIAAL_R06094	7.79556	8.44755	8.05928	9.67893	8.73403	8.19744
URIAAL_R06095	15.1107	14.6932	15.114	15.8947	16.2238	14.4883
URIAAL_R09068	6.06515	7.39321	6.06262	6.60201	7.11006	6.51105
URIAAL_R14821	12.993	12.3693	12.402	12.5362	12.6994	13.0238
URIAAL_R09051	12.398	12.4053	11.5779	11.7719	12.1117	12.8161
URIAAL_R09042	4.73823	5.50716	4.8186	5.51246	5.09837	5.63809
URIAAL_R06122	9.17842	9.19776	8.14115	9.81236	8.9673	9.08298
URIAAL_R06121	7.50186	6.95146	7.0435	8.10681	7.25736	6.51105
URIAAL_R06099	4.36355	4.36355	4.36355	5.37708	4.36355	4.76846
URIAAL_R06120	6.12982	5.96567	6.03774	7.04623	5.94423	6.44119
URIAAL_R06119	4.36355	4.86922	4.36355	5.01234	4.36355	4.93434
URIAAL_R09067	5.26897	5.54055	4.8186	4.36355	4.79084	5.41495
URIAAL_R06096	10.0036	10.5854	10.2971	10.5152	11.2794	10.2057
URIAAL_R06101	4.36355	4.36355	4.36355	4.36355	4.36355	4.36355
URIAAL_R09033	5.80569	6.29177	7.06646	6.34845	6.92305	5.25757
URIAAL_R09034	11.3148	11.1315	11.3925	11.5284	11.1607	11.5995
URIAAL_R06097	10.7743	10.1302	10.6915	10.3518	10.3458	10.3317
URIAAL_R14823	6.03145	5.9207	6.01232	6.00468	6.3477	6.64047
URIAAL_R09066	13.8591	13.3284	13.7292	12.647	12.6802	13.3736
URIAAL_R06131	7.47916	7.68075	8.17781	7.91638	8.08497	8.02634
URIAAL_R13763	4.36355	4.36355	4.36355	4.36355	4.36355	4.36355
URIAAL_R13768	4.36355	4.36355	4.36355	5.27367	4.36355	4.76846
URIAAL_R13706	5.76322	5.69246	5.57869	6.32827	5.47081	5.4842
URIAAL_R13725	6.7992	6.52229	7.1967	7.87765	6.23996	7.20616
URIAAL_R14688	4.36355	4.36355	4.36355	4.36355	4.36355	4.36355
URIAAL_R06172	6.50727	7.3091	7.10019	8.87654	5.76241	7.43787
URIAAL_R13724	12.3051	11.8559	12.4942	11.8397	12.4765	11.803
URIAAL_R13723	5.6246	6.00896	5.4565	5.63096	5.67416	5.63809
URIAAL_R13722	4.89196	5.23077	5.68743	4.36355	4.96566	5.06039
URIAAL_R06171	4.89196	5.57283	5.07869	4.36355	5.03553	4.36355
URIAAL_R06154	5.00894	5.1825	4.36355	5.55357	4.36355	4.65033
URIAAL_R06166	4.36355	4.86922	4.36355	4.36355	4.36355	4.36355
URIAAL_R06205	6.03145	4.36355	5.4565	5.08744	4.66624	6.11555
URIAAL_R13767	5.80569	5.60408	5.53966	5.27367	5.96798	5.45023
URIAAL_R06170	10.3646	10.3344	10.3264	11.7153	11.4617	9.90521
URIAAL_R06153	7.45609	8.00391	7.7252	7.3718	7.35026	9.24524
URIAAL_R06163	10.8548	10.7838	10.1501	10.4888	10.4943	11.4074
URIAAL_R06152	11.8355	11.1061	11.6492	11.0439	11.1211	13.141
URIAAL_R06169	12.4276	11.1331	11.414	10.1977	9.99088	10.4238
URIAAL_R06151	12.5755	12.2713	12.5542	11.9348	12.405	11.7633
URIAAL_R06208	10.3889	10.9073	10.8033	10.7813	10.2575	10.6828
URIAAL_R06207	9.03582	9.48028	8.95922	8.70379	8.89183	9.00938
URIAAL_R06150	5.84658	5.63439	6.34688	5.83355	6.03644	6.33654
URIAAL_R06203	10.4023	10.4929	10.7147	9.72118	10.8049	10.5919
URIAAL_R06149	8.99686	9.25324	10.117	9.00118	8.7028	9.09597
URIAAL_R13721	9.684	9.43658	9.65048	8.98316	9.23053	9.83342
URIAAL_R13770	5.80569	5.36014	5.41195	4.68999	5.15586	6.13403
URIAAL_R13764	4.89196	5.13086	4.36355	4.36355	5.30566	5.37823
URIAAL_R13720	7.50186	7.15949	7.77409	6.63452	7.03007	7.903
URIAAL_R06168	10.9124	10.624	11.0218	11.3868	10.7435	11.4543
URIAAL_R13719	4.36355	5.43662	5.00448	5.89349	5.3921	5.82084
URIAAL_R13718	4.36355	4.36355	4.36355	4.36355	4.36355	4.36355
URIAAL_R06167	4.89196	4.36355	4.36355	5.01234	4.36355	4.36355
URIAAL_R13717	13.0723	13.323	13.4931	12.5207	13.029	13.3684
URIAAL_R06147	12.1047	12.022	12.5447	12.193	12.3505	12.5562
URIAAL_R13715	8.03099	7.97962	8.8917	7.59632	8.88628	8.55571
URIAAL_R13714	4.36355	4.77713	5.20637	5.46951	4.88592	4.93434
URIAAL_R06161	4.36355	4.36355	4.36355	5.15491	4.36355	4.36355
URIAAL_R13713	4.36355	4.36355	4.68598	4.82423	5.09837	4.36355
URIAAL_R06148	6.4353	7.3012	8.08158	7.01024	8.50331	7.72924
URIAAL_R06173	9.84606	10.1861	10.8843	9.63348	10.4012	10.7196
URIAAL_R13704	11.2434	12.2573	12.0176	11.2907	11.5894	12.1298
URIAAL_R06174	10.5521	10.8011	11.3412	10.8358	10.8772	10.1632
URIAAL_R13771	4.36355	5.13086	5.00448	4.68999	4.66624	4.36355
URIAAL_R14687	10.4318	10.1236	9.35052	10.2514	9.87264	10.3059
URIAAL_R06165	5.67288	6.55014	5.2628	6.58545	5.84398	5.63809
URIAAL_R13705	5.52047	6.24019	5.81682	5.15491	4.79084	5.25757
URIAAL_R06175	5.96101	5.72032	6.15728	6.24417	5.25885	5.4842
URIAAL_R06176	5.33896	4.36355	4.36355	4.36355	4.36355	4.36355
URIAAL_R13712	5.52047	4.36355	4.36355	5.01234	4.36355	4.36355
URIAAL_R13726	5.10677	5.54055	5.00448	6.58545	4.79084	5.25757
URIAAL_R06177	5.92413	8.45108	6.36628	8.2346	5.34997	5.57938
URIAAL_R13727	4.36355	4.86922	5.61625	5.55357	5.3921	4.36355
URIAAL_R13728	4.36355	4.36355	4.36355	4.36355	4.36355	4.36355
URIAAL_R13729	7.8669	7.50717	7.31575	7.23413	7.46776	8.10588
URIAAL_R13730	5.10677	5.1825	5.90474	5.27367	4.96566	5.00069
URIAAL_R13731	4.36355	4.36355	4.68598	4.92659	4.36355	4.36355
URIAAL_R13732	5.10677	4.65649	4.8186	4.36355	4.79084	4.76846
URIAAL_R06138	4.36355	4.36355	4.36355	5.37708	4.36355	4.36355
URIAAL_R06178	5.10677	4.77713	4.36355	5.2166	4.96566	4.76846
URIAAL_R06179	4.36355	4.36355	4.36355	4.36355	4.36355	4.36355
URIAAL_R13733	6.12982	5.1825	6.49445	5.08744	6.10117	6.11555
URIAAL_R13734	5.84658	5.47256	5.75407	5.27367	5.76241	5.74631
URIAAL_R13735	5.80569	5.43662	4.68598	4.36355	5.64302	5.91299
URIAAL_R06139	4.36355	4.36355	4.36355	4.36355	5.09837	4.76846
URIAAL_R06162	4.36355	5.1825	4.36355	4.36355	4.96566	4.36355
URIAAL_R06180	13.9287	14.119	14.3921	13.8412	14.2196	14.1259
URIAAL_R13765	4.73823	4.36355	4.36355	4.36355	4.36355	4.36355
URIAAL_R13736	4.36355	4.36355	4.36355	4.82423	4.36355	4.36355
URIAAL_R13737	4.36355	4.36355	4.8186	5.37708	4.36355	4.36355
URIAAL_R13761	4.36355	4.36355	4.36355	4.36355	4.36355	4.36355
URIAAL_R06140	4.36355	4.36355	5.2628	4.68999	4.36355	5.25757
URIAAL_R13738	4.36355	4.36355	4.36355	4.82423	4.36355	4.36355
URIAAL_R15305	4.36355	5.63439	5.4565	5.70287	5.03553	5.45023
URIAAL_R06141	9.59557	9.16813	9.87818	9.49209	9.49907	9.42745
URIAAL_R13769	6.45974	6.43499	6.38539	6.24417	6.16259	6.48356
URIAAL_R06142	5.67288	6.30851	5.90474	5.66754	6.03644	6.32086
URIAAL_R13739	5.10677	4.77713	5.20637	4.92659	6.03644	4.93434
URIAAL_R13740	15.9237	14.8705	16.6554	16.6555	16.1625	14.7439
URIAAL_R06143	12.0658	11.9592	12.2935	12.347	12.7991	11.7585
URIAAL_R13741	11.2698	10.9632	11.7603	10.3967	10.8347	11.8934
URIAAL_R13702	4.36355	5.01419	4.36355	4.82423	5.30566	5.37823
URIAAL_R06181	4.36355	4.36355	4.36355	4.36355	4.36355	4.36355
URIAAL_R06182	4.36355	4.36355	4.36355	4.36355	4.36355	4.36355
URIAAL_R06204	4.36355	5.01419	4.36355	5.01234	4.36355	5.16567
URIAAL_R13703	4.36355	4.65649	5.49899	4.36355	5.50778	5.33991
URIAAL_R13711	4.36355	5.36014	5.72127	5.95042	5.61089	5.60916
URIAAL_R06183	7.57855	8.00391	8.93503	8.0207	7.68331	9.14261
URIAAL_R06184	13.1053	12.8671	13.069	12.9386	13.1146	13.0224
URIAAL_R06144	4.36355	4.36355	4.36355	5.15491	5.34997	4.36355
URIAAL_R13742	6.90714	7.1058	7.99022	6.19989	7.37457	7.21427
URIAAL_R06186	9.84606	9.74387	10.6615	9.01307	9.42268	9.96889
URIAAL_R15611	11.552	11.0486	11.6296	10.3318	9.58193	10.349
URIAAL_R06187	11.5235	10.9213	11.6112	10.4468	9.49725	10.3142
URIAAL_R06145	10.4434	10.358	10.3855	10.6553	9.941	10.485
URIAAL_R13743	6.27795	8.04662	6.11088	6.65048	7.26606	6.20527
URIAAL_R06210	4.36355	4.77713	4.36355	4.36355	4.96566	4.36355
URIAAL_R06188	6.97461	4.36355	5.14539	6.00468	4.36355	4.36355
URIAAL_R13766	6.48372	6.32502	6.08699	5.66754	5.54337	5.29977
URIAAL_R06146	8.81165	8.66656	9.57627	8.32825	9.01635	8.71309
URIAAL_R06164	4.89196	5.01419	5.36507	4.68999	5.15586	5.06039
URIAAL_R06189	10.5085	11.0335	10.1317	10.07	10.7227	10.9849
URIAAL_R13744	9.43301	8.38252	8.61918	8.55296	9.10731	8.75467
URIAAL_R06190	5.76322	5.43662	5.14539	6.30777	5.89521	5.57938
URIAAL_R13745	6.03145	6.27481	6.11088	6.75716	6.95605	6.53797
URIAAL_R06191	13.3925	13.763	13.2414	13.6519	14.4311	13.2236
URIAAL_R13746	5.10677	4.77713	4.36355	4.36355	4.96566	4.85866
URIAAL_R06192	9.13961	10.5182	9.87342	9.70845	10.613	9.86029
URIAAL_R06155	5.80569	8.2388	7.12222	7.58026	6.98826	6.05834
URIAAL_R06193	16.1894	15.764	16.1922	15.1233	15.1665	15.6098
URIAAL_R13759	8.36156	8.98355	8.25333	7.78296	8.67411	8.77097
URIAAL_R13747	6.03145	7.12393	6.71826	5.95042	5.47081	5.66621
URIAAL_R13707	8.27278	7.93987	9.30645	7.97256	8.93006	8.61413
URIAAL_R06194	4.73823	4.36355	5.07869	5.46951	4.36355	5.06039
URIAAL_R13748	4.36355	5.07511	4.36355	5.89349	4.36355	4.36355
URIAAL_R13749	5.26897	5.1825	4.68598	5.15491	4.79084	5.41495
URIAAL_R06195	10.8753	11.5065	11.2259	10.8096	11.2152	11.2432
URIAAL_R06156	10.2796	9.75387	10.1475	9.31143	9.92083	11.03
URIAAL_R13750	4.36355	4.36355	4.8186	4.36355	4.66624	5.00069
URIAAL_R13708	4.36355	4.36355	4.36355	4.36355	4.36355	4.36355
URIAAL_R13709	5.00894	4.77713	4.91973	4.36355	5.34997	5.37823
URIAAL_R06196	7.97568	8.55305	8.44147	7.1155	7.85896	8.74094
URIAAL_R06197	12.0658	11.6734	12.5437	12.3665	11.4912	10.9947
URIAAL_R13751	11.7136	11.6734	12.1075	11.8787	12.1769	11.59
URIAAL_R06198	10.6342	11.3168	11.3487	11.0103	11.5554	11.0869
URIAAL_R06199	7.00713	6.77741	8.31571	5.86392	6.52428	6.83511
URIAAL_R13716	11.6373	11.8612	12.4747	11.8731	12.586	11.6644
URIAAL_R13752	10.9249	11.2558	11.6877	11.5535	12.1758	11.0379
URIAAL_R13753	7.17345	6.41984	7.27719	6.51702	6.41475	6.84573
URIAAL_R06206	7.25639	6.65598	7.50241	7.3718	7.26606	7.77878
URIAAL_R06212	7.08523	7.1329	7.06646	7.01024	7.53381	7.89803
URIAAL_R06202	6.7992	6.85632	6.24513	6.28692	7.35841	7.6003
URIAAL_R06200	11.0574	11.1963	10.5466	10.4941	11.0001	10.707
URIAAL_R06157	10.9134	10.24	10.2067	10.0855	10.5069	10.7245
URIAAL_R06158	10.7132	11.1915	10.8468	11.2517	11.2736	11.4083
URIAAL_R13754	4.89196	5.72032	5.53966	5.97787	5.7338	5.84459
URIAAL_R13755	5.33896	5.1825	5.4565	5.01234	4.36355	5.45023
URIAAL_R13760	6.66125	7.69878	7.53531	7.4712	7.61731	6.95735
URIAAL_R13756	7.32191	8.0278	7.8671	7.99683	8.28424	6.8976
URIAAL_R13762	8.09168	7.46551	8.56499	7.51415	7.33383	8.41743
URIAAL_R06211	7.66136	7.98939	8.3482	7.44478	7.77688	7.73483
URIAAL_R06209	8.59899	8.61408	9.2065	8.57722	8.78262	8.46168
URIAAL_R06159	12.2458	12.0279	11.8377	12.3537	12.6957	11.6875
URIAAL_R13757	8.82507	9.21027	10.2218	8.74004	10.1872	9.33741
URIAAL_R13710	10.0016	9.45597	10.6355	10.1285	10.3448	9.54884
URIAAL_R06201	7.70102	9.09351	7.37167	8.62843	6.67977	6.98626
URIAAL_R13758	4.36355	4.36355	5.00448	4.82423	4.96566	4.65033
URIAAL_R06160	4.36355	4.86922	4.36355	5.15491	4.96566	4.36355
URIAAL_R00744	9.50414	8.40088	9.297	10.5026	9.47344	9.15507
URIAAL_R00766	4.36355	5.82504	5.2628	6.60201	5.54337	4.36355
URIAAL_R12694	4.36355	4.65649	4.36355	4.36355	4.36355	4.36355
URIAAL_R12693	6.64032	6.6432	6.76168	7.36241	6.74484	7.13097
URIAAL_R00745	10.5588	10.755	9.90174	10.3495	10.5399	10.7858
URIAAL_R12692	5.71901	5.77394	5.49899	5.55357	6.03644	5.69359
URIAAL_R12670	8.03872	9.85689	9.13667	8.34249	8.59466	8.93422
URIAAL_R12691	10.6241	10.6411	11.0752	10.0296	9.64069	9.97358
URIAAL_R00776	4.36355	4.36355	4.36355	4.36355	4.36355	4.36355
URIAAL_R12671	4.36355	4.36355	4.36355	5.55357	4.36355	4.36355
URIAAL_R12672	5.40361	4.36355	4.36355	5.70287	4.66624	4.36355
URIAAL_R00746	7.28297	6.43499	7.41662	7.46245	6.67977	6.8976
URIAAL_R00775	6.45974	7.16823	6.51176	6.56867	7.06062	6.7356
URIAAL_R00747	10.2764	9.72946	9.30645	10.6003	10.0857	9.96536
URIAAL_R00748	9.16091	8.53987	8.51685	8.49045	8.28846	9.44277
URIAAL_R00777	5.33896	4.36355	4.36355	5.32696	4.79084	5.25757
URIAAL_R00749	10.3353	12.823	11.7791	11.2864	13.2151	11.1254
URIAAL_R12680	9.33025	9.81247	10.4348	8.9557	9.74841	9.92594
URIAAL_R12690	6.76121	6.66863	6.28682	5.89349	6.77	7.1137
URIAAL_R12689	9.44173	9.11586	8.84052	8.96797	8.93275	8.93422
URIAAL_R00765	8.27278	8.69359	7.89889	7.41786	7.90932	8.49807
URIAAL_R00750	5.26897	5.1825	5.57869	5.08744	4.79084	5.72028
URIAAL_R00751	11.4491	12.1666	12.2189	12.1133	12.169	11.9094
URIAAL_R00774	9.20942	9.65669	9.92951	8.98316	9.33591	9.85011
URIAAL_R00752	10.6506	10.1302	10.1877	8.9771	9.24142	9.9416
URIAAL_R00773	6.35905	6.40452	6.62695	6.78614	5.76241	6.74703
URIAAL_R12688	10.1491	9.7222	9.49596	10.0179	9.67963	9.6637
URIAAL_R00753	10.0819	9.90513	9.62805	10.1037	10.161	10.0677
URIAAL_R12673	6.06515	6.34133	6.40422	6.61837	7.1389	5.79656
URIAAL_R00772	11.3156	10.9942	10.7236	11.5797	10.9339	11.4941
URIAAL_R12674	4.36355	4.77713	4.8186	5.01234	4.36355	4.76846
URIAAL_R12675	6.50727	6.55014	6.54572	6.49934	6.59724	7.13097
URIAAL_R12676	10.0948	10.9742	10.3631	11.0029	11.3364	10.131
URIAAL_R12695	9.46759	10.1059	10.2648	9.0796	10.1939	9.45458
URIAAL_R00763	6.83614	8.03253	8.94111	6.98571	7.5969	6.75836
URIAAL_R00754	9.86995	9.69279	9.67256	10.0413	9.62414	10.2557
URIAAL_R00767	6.16091	6.46475	6.20199	7.23413	7.1389	6.83511
URIAAL_R12682	4.36355	5.27621	5.72127	4.36355	4.96566	5.54868
URIAAL_R00759	7.30905	7.11489	6.85785	7.4712	6.85456	7.96126
URIAAL_R12678	7.46767	7.71659	7.2575	7.84456	7.55515	8.39303
URIAAL_R00758	5.26897	4.36355	4.36355	4.36355	5.3921	4.36355
URIAAL_R00768	5.96101	5.63439	5.98635	5.92231	5.94423	5.97751
URIAAL_R15326	4.36355	4.36355	4.36355	4.36355	4.36355	4.36355
URIAAL_R12683	8.42176	7.32477	7.16527	6.32827	7.63744	7.6837
URIAAL_R00757	8.36769	9.35442	8.90109	8.52828	9.4379	9.10242
URIAAL_R12679	5.40361	4.36355	4.36355	4.36355	5.15586	5.06039
URIAAL_R12681	4.36355	4.36355	4.8186	4.36355	4.36355	4.36355
URIAAL_R12696	4.36355	4.36355	5.00448	4.82423	4.36355	4.85866
URIAAL_R12684	5.19227	5.27621	5.2628	4.82423	5.43231	5.37823
URIAAL_R12685	5.6246	5.31923	5.61625	4.36355	5.86989	6.57735
URIAAL_R12677	11.3052	10.8795	11.0304	11.3339	11.4125	11.1802
URIAAL_R00781	8.05405	7.0308	7.73228	8.19326	8.14213	7.59415
URIAAL_R00780	9.6265	9.9703	9.5645	9.16199	10.0857	9.76872
URIAAL_R00769	10.9155	10.4346	10.4218	10.9186	11.2069	10.4246
URIAAL_R00779	5.57391	5.50716	5.65245	5.70287	5.67416	6.18785
URIAAL_R00770	9.30178	9.26528	9.91878	8.46466	9.56643	9.57225
URIAAL_R00756	13.8365	14.5384	13.9285	13.2204	14.8502	14.4964
URIAAL_R12686	11.1944	10.8632	11.0565	10.1501	11.9218	11.3499
URIAAL_R00764	8.65016	7.37829	7.33464	6.38787	9.32776	8.11872
URIAAL_R00782	4.36355	6.18637	4.36355	4.68999	6.83093	5.06039
URIAAL_R00760	4.36355	4.36355	4.36355	4.36355	5.09837	4.36355
URIAAL_R00755	4.36355	4.36355	4.36355	4.36355	4.36355	4.36355
URIAAL_R12687	5.10677	4.36355	4.36355	4.36355	4.66624	4.36355
URIAAL_R00771	4.36355	4.36355	4.36355	4.36355	4.36355	4.36355
URIAAL_R00778	5.76322	5.57283	5.36507	5.46951	6.05841	6.56436
URIAAL_R00761	4.36355	4.36355	5.20637	5.51246	4.96566	4.36355
URIAAL_R00762	4.36355	4.36355	4.36355	5.70287	4.36355	4.36355
URIAAL_R08052	4.36355	4.36355	4.36355	4.36355	4.36355	4.36355
URIAAL_R08051	7.25639	7.88332	6.92258	9.40685	6.33037	7.45838
URIAAL_R03764	4.36355	4.36355	4.36355	4.36355	4.36355	4.76846
URIAAL_R03763	12.586	11.8632	12.4917	11.7666	12.6466	12.2369
URIAAL_R14626	4.36355	4.77713	4.36355	4.82423	4.79084	4.76846
URIAAL_R03783	4.36355	4.36355	4.36355	5.42448	4.36355	4.36355
URIAAL_R03782	4.36355	4.36355	4.36355	5.08744	4.79084	4.93434
URIAAL_R08071	10.318	9.87795	10.8906	10.3681	9.076	10.4652
URIAAL_R08070	6.7992	7.54097	7.32523	6.13033	6.93414	7.93727
URIAAL_R03786	9.05491	9.43303	9.1287	8.86346	9.5045	9.21382
URIAAL_R03781	7.25639	7.86219	8.0078	6.78614	6.8428	8.47502
URIAAL_R08064	7.83167	6.66863	7.37167	7.14888	6.25857	7.95171
URIAAL_R03765	10.0948	10.899	10.0706	9.91879	9.73922	10.4543
URIAAL_R03788	8.502	8.54977	8.33436	8.04418	8.6283	8.70745
URIAAL_R03780	5.67288	4.94647	4.68598	8.25483	5.2091	4.93434
URIAAL_R03779	4.36355	5.27621	4.36355	4.92659	4.79084	4.36355
URIAAL_R08069	4.36355	4.36355	4.36355	4.36355	4.36355	4.36355
URIAAL_R08068	6.33259	6.07106	5.49899	5.95042	5.61089	5.66621
URIAAL_R15130	6.06515	6.43499	6.32718	6.36831	6.41475	6.6649
URIAAL_R08067	6.22081	6.27481	6.42278	6.78614	6.3648	6.42675
URIAAL_R08066	12.1604	11.8142	12.374	11.1371	11.8079	12.064
URIAAL_R03762	9.46759	9.49909	10.1851	9.11863	9.65052	9.45793
URIAAL_R08050	4.89196	5.43662	5.8469	5.89349	6.87777	6.13403
URIAAL_R08065	5.71901	6.41984	6.65809	5.77018	6.85456	6.32086
URIAAL_R03787	8.33048	8.85122	9.33444	9.08805	8.74326	7.9421
URIAAL_R03761	6.53041	6.47937	6.44108	6.30777	7.37457	6.25613
URIAAL_R03778	6.76121	7.37077	6.52885	6.63452	7.42968	6.98626
URIAAL_R08077	6.99097	7.0404	7.0435	7.30467	7.81851	6.62808
URIAAL_R03777	4.36355	5.13086	5.68743	5.08744	5.3921	5.51699
URIAAL_R03784	4.36355	4.36355	5.20637	4.36355	4.36355	4.36355
URIAAL_R08063	4.36355	4.36355	4.36355	5.15491	4.79084	4.93434
URIAAL_R08074	4.73823	4.36355	4.36355	5.89349	4.36355	4.36355
URIAAL_R03760	5.46389	5.27621	5.14539	6.81451	5.2091	5.84459
URIAAL_R08054	10.1004	9.45772	9.59759	9.34473	9.83	9.05665
URIAAL_R03776	9.39158	9.09576	8.89484	9.26249	8.85539	8.90252
URIAAL_R08062	4.89196	4.94647	4.8186	5.63096	4.79084	5.29977
URIAAL_R15129	8.51311	9.10919	9.0744	9.77797	9.376	8.57442
URIAAL_R08061	7.26974	7.75154	7.6819	7.68149	7.17644	7.27749
URIAAL_R03759	7.3845	7.17693	7.48567	7.53931	7.41415	6.94757
URIAAL_R03758	8.9929	9.21235	9.95976	9.1296	9.38389	8.51432
URIAAL_R08060	8.24637	8.16328	8.47126	8.14528	8.3259	8.09726
URIAAL_R03757	8.98894	8.81613	8.68598	8.17744	8.10428	8.21347
URIAAL_R08055	4.36355	4.36355	4.36355	5.70287	4.36355	4.36355
URIAAL_R03775	6.30557	5.07511	5.14539	6.75716	5.09837	5.9564
URIAAL_R08072	7.76785	6.96164	6.67339	7.02234	5.89521	7.21427
URIAAL_R08073	7.59971	6.88878	7.42544	7.25465	6.43097	7.3888
URIAAL_R03785	7.73005	7.68679	6.71826	7.67395	7.8703	7.65448
URIAAL_R03768	7.22929	8.20154	7.65974	8.10681	8.23697	8.20146
URIAAL_R03756	13.8868	13.5113	13.7928	13.5516	13.6607	13.1727
URIAAL_R08049	6.22081	5.07511	5.57869	6.63452	5.89521	5.91299
URIAAL_R03766	10.34	9.64137	9.10452	10.9051	9.5647	10.0208
URIAAL_R03755	9.2196	8.50297	8.74285	9.62383	9.44546	8.74645
URIAAL_R08048	4.36355	4.65649	4.36355	6.56867	4.88592	5.06039
URIAAL_R03769	4.89196	5.07511	4.8186	6.38787	5.54337	5.16567
URIAAL_R03767	7.47916	7.08743	7.50241	7.88418	6.62532	7.78956
URIAAL_R03770	9.5425	9.8409	9.75077	10.5173	9.70502	9.43768
URIAAL_R08053	10.638	10.2359	10.3183	10.7488	10.5653	10.9048
URIAAL_R08047	11.0259	11.7536	11.1407	12.326	12.1831	11.2306
URIAAL_R08059	7.78638	8.37511	8.33436	9.53186	8.8325	8.2411
URIAAL_R03774	10.9516	10.9888	10.5093	11.2194	11.4235	11.0033
URIAAL_R08058	7.32191	6.8118	6.88411	7.39041	7.47526	7.59415
URIAAL_R08075	10.4974	10.5341	10.3744	10.5775	9.81113	10.5673
URIAAL_R08057	8.77064	8.27909	7.86065	7.96643	7.12935	8.76826
URIAAL_R03773	4.36355	5.43662	4.36355	4.36355	4.79084	4.85866
URIAAL_R03772	5.33896	5.54055	4.36355	4.82423	4.79084	4.76846
URIAAL_R08056	8.87321	9.02902	9.3041	9.05105	7.64409	7.49853
URIAAL_R03771	6.53041	6.03003	5.68743	5.77018	4.88592	6.78074
URIAAL_R08076	6.64032	7.45845	7.97241	7.34343	7.15779	7.73483
URIAAL_R15128	13.0449	12.0619	12.2851	10.917	11.7219	12.5871
URIAAL_R10785	4.36355	4.36355	4.36355	5.27367	4.36355	4.36355
URIAAL_R14152	11.0734	11.0909	11.1597	10.1023	10.4704	12.0681
URIAAL_R10779	10.6279	10.7942	11.0124	9.99861	10.7343	10.979
URIAAL_R10788	5.00894	4.94647	4.91973	4.82423	5.09837	5.25757
URIAAL_R10781	4.36355	4.36355	4.36355	4.82423	4.36355	4.36355
URIAAL_R10786	4.36355	4.36355	4.36355	4.36355	4.36355	4.36355
URIAAL_R10789	4.36355	4.36355	4.36355	4.36355	4.36355	4.36355
URIAAL_R10780	4.36355	4.36355	4.36355	5.01234	4.79084	4.36355
URIAAL_R10782	5.6246	5.43662	5.00448	5.15491	5.61089	4.93434
URIAAL_R10790	10.1755	10.5579	9.32284	9.48357	10.3418	10.0819
URIAAL_R14163	16.2338	16.7486	16.6073	15.5287	17.8311	15.9521
URIAAL_R14153	7.17345	8.57261	7.85418	7.93535	6.3128	7.21427
URIAAL_R14154	5.26897	4.36355	4.36355	5.37708	4.36355	4.36355
URIAAL_R14162	4.36355	4.36355	4.36355	5.2166	4.66624	4.65033
URIAAL_R10791	4.36355	4.36355	4.36355	4.82423	4.36355	4.36355
URIAAL_R10806	4.36355	4.77713	4.36355	4.36355	4.36355	4.36355
URIAAL_R10792	10.6644	9.65669	10.4845	10.8028	9.47897	8.64984
URIAAL_R14155	4.89196	5.63439	5.61625	5.66754	5.81746	4.93434
URIAAL_R14156	4.36355	4.36355	4.36355	5.27367	4.36355	4.36355
URIAAL_R10793	10.1807	10.8372	10.5052	10.1635	10.911	10.8825
URIAAL_R10794	4.36355	4.94647	4.36355	5.42448	4.36355	4.36355
URIAAL_R10787	7.5242	7.6686	8.67871	7.77595	8.40186	8.51754
URIAAL_R14157	10.7789	11.0056	11.8986	11.6621	11.011	10.9298
URIAAL_R10795	9.69862	9.56551	10.0327	9.13504	9.82567	9.76331
URIAAL_R10805	6.55314	5.69246	6.88411	5.55357	6.47847	6.03865
URIAAL_R14158	6.22081	6.95146	7.15463	6.13033	6.9006	7.26195
URIAAL_R10796	11.7184	12.2643	11.9138	11.0301	11.58	11.2153
URIAAL_R14164	4.36355	5.54055	5.36507	5.63096	5.2091	4.93434
URIAAL_R14151	5.10677	4.77713	4.8186	5.63096	4.36355	4.76846
URIAAL_R14159	11.4059	11.2309	11.4723	10.8449	11.8031	11.0033
URIAAL_R10783	11.518	12.3797	12.0072	11.5201	11.973	11.5712
URIAAL_R10784	5.71901	4.65649	5.87619	6.51702	6.46283	6.27263
URIAAL_R14160	5.57391	5.23077	5.75407	5.15491	4.66624	4.93434
URIAAL_R14174	4.36355	4.36355	4.36355	4.36355	4.36355	4.36355
URIAAL_R14170	4.36355	4.36355	4.36355	4.36355	4.36355	4.36355
URIAAL_R10797	4.36355	4.36355	4.36355	4.36355	4.36355	4.36355
URIAAL_R10798	4.36355	4.77713	4.36355	5.15491	4.96566	4.36355
URIAAL_R10799	6.22081	5.87389	5.14539	5.97787	6.63915	6.32086
URIAAL_R14172	9.68644	9.44895	9.26585	10.0728	9.84293	9.51864
URIAAL_R14171	10.2942	10.4337	9.83314	10.4136	10.6079	10.3899
URIAAL_R14165	5.99676	7.77437	6.62695	8.18274	6.83093	6.91781
URIAAL_R10800	6.72212	7.56744	6.65809	6.63452	6.47847	7.14804
URIAAL_R14166	8.07675	8.53655	8.15698	7.38114	7.1389	7.86279
URIAAL_R15458	7.50186	8.26311	8.17781	6.97328	7.11006	7.71799
URIAAL_R14167	6.85424	7.63151	7.50241	7.4712	6.65282	6.95735
URIAAL_R15457	7.42075	8.34128	8.0078	6.66626	6.97761	7.55033
URIAAL_R14175	8.02322	8.62035	8.75327	7.68898	7.3088	8.38598
URIAAL_R14168	7.57855	8.44401	8.43284	7.82432	6.86621	8.33198
URIAAL_R10801	5.46389	6.16789	5.2628	5.55357	5.09837	5.60916
URIAAL_R14169	4.36355	4.36355	4.36355	4.36355	4.36355	4.36355
URIAAL_R10804	5.33896	5.63439	5.4565	4.36355	4.79084	4.65033
URIAAL_R10803	4.36355	4.94647	4.36355	4.36355	4.79084	4.76846
URIAAL_R14161	4.36355	4.36355	4.36355	4.92659	4.36355	4.36355
URIAAL_R14173	4.36355	4.94647	4.36355	4.36355	4.36355	4.36355
URIAAL_R10802	9.41244	9.75672	9.53466	8.94021	9.86983	9.82306
URIAAL_R10173	5.26897	5.3992	5.20637	5.37708	4.88592	4.36355
URIAAL_R01435	4.36355	4.36355	4.36355	4.36355	4.36355	4.36355
URIAAL_R10174	4.36355	4.36355	4.36355	5.08744	4.66624	4.36355
URIAAL_R01355	9.03582	8.70839	9.50214	8.2295	9.45671	9.36269
URIAAL_R10175	8.39197	8.57584	7.31575	8.27972	8.5356	8.56509
URIAAL_R01321	10.6656	10.5374	10.4825	10.3139	10.891	11.0998
URIAAL_R10135	4.36355	4.36355	4.36355	4.36355	4.96566	4.36355
URIAAL_R01346	4.36355	4.36355	4.36355	4.36355	4.79084	4.36355
URIAAL_R01356	10.9728	10.9496	11.3696	10.5874	10.6461	10.8421
URIAAL_R15384	7.93482	6.98176	7.2575	7.3718	6.66636	7.49853
URIAAL_R01357	9.32083	9.089	8.75327	8.91508	8.96992	8.97463
URIAAL_R01350	4.36355	4.36355	4.91973	5.15491	5.2091	5.33991
URIAAL_R01320	10.5957	10.5725	10.61	11.4596	11.2152	10.1363
URIAAL_R01358	5.10677	5.23077	5.57869	5.37708	5.47081	5.86786
URIAAL_R15283	4.36355	4.36355	4.36355	4.36355	4.36355	4.36355
URIAAL_R15278	4.36355	4.36355	4.36355	4.36355	4.36355	4.36355
URIAAL_R15282	4.36355	4.36355	4.36355	4.36355	4.36355	4.36355
URIAAL_R15280	4.36355	4.36355	4.36355	5.2166	4.66624	4.76846
URIAAL_R15277	4.36355	4.36355	4.36355	4.36355	4.36355	4.36355
URIAAL_R15281	4.36355	4.36355	4.36355	4.36355	4.36355	4.36355
URIAAL_R15276	4.36355	4.36355	4.36355	4.36355	4.36355	4.36355
URIAAL_R15279	4.36355	4.36355	4.36355	4.36355	4.36355	4.36355
URIAAL_R15291	4.36355	4.36355	4.36355	4.36355	4.36355	4.36355
URIAAL_R01359	4.73823	4.36355	4.36355	5.66754	4.36355	4.36355
URIAAL_R01360	4.36355	4.36355	4.36355	4.36355	4.36355	4.36355
URIAAL_R10176	4.36355	4.36355	4.8186	4.36355	5.25885	4.36355
URIAAL_R10249	5.26897	5.23077	4.8186	4.36355	5.61089	5.37823
URIAAL_R01361	11.1552	10.9773	10.9224	10.7506	11.4668	10.8968
URIAAL_R01439	4.89196	5.27621	5.41195	5.70287	5.57771	5.9564
URIAAL_R01362	4.36355	4.36355	4.36355	4.36355	4.36355	4.36355
URIAAL_R01363	4.73823	4.36355	4.36355	5.63096	4.36355	4.76846
URIAAL_R10177	4.36355	4.36355	4.36355	5.70287	4.36355	4.36355
URIAAL_R10178	9.27599	10.9924	10.0112	9.27489	10.3091	9.1131
URIAAL_R01364	6.72212	6.25762	7.46017	6.32827	6.39831	6.51105
URIAAL_R10254	4.36355	4.36355	4.36355	5.27367	4.36355	4.36355
URIAAL_R01365	4.36355	4.36355	4.36355	5.15491	4.36355	4.36355
URIAAL_R10134	4.36355	4.36355	4.36355	4.36355	4.36355	4.36355
URIAAL_R10248	4.36355	4.36355	4.36355	4.36355	4.36355	4.36355
URIAAL_R10179	4.36355	4.77713	5.3155	5.27367	4.79084	5.54868
URIAAL_R10133	5.6246	4.94647	5.81682	4.92659	5.7338	6.01862
URIAAL_R01366	5.00894	4.36355	4.8186	5.15491	4.36355	4.36355
URIAAL_R01322	4.36355	4.36355	4.36355	4.82423	4.36355	4.36355
URIAAL_R10263	4.36355	4.36355	4.36355	4.36355	4.36355	4.36355
URIAAL_R10137	8.98894	8.10614	7.83458	9.08524	7.30036	8.70463
URIAAL_R01436	8.635	9.3086	9.14723	7.7689	9.27361	9.3483
URIAAL_R01323	5.10677	4.36355	5.68743	4.92659	4.96566	4.93434
URIAAL_R10180	4.36355	5.1825	5.07869	5.55357	4.79084	4.65033
URIAAL_R01367	4.36355	4.36355	4.8186	4.36355	5.30566	5.00069
URIAAL_R10138	9.78341	10.0209	10.2804	10.0614	10.4138	9.78884
URIAAL_R10181	5.84658	5.47256	5.20637	5.95042	5.09837	5.37823
URIAAL_R15284	4.36355	4.36355	4.36355	5.15491	4.36355	5.00069
URIAAL_R15293	4.36355	4.36355	5.20637	4.36355	4.36355	5.00069
URIAAL_R01368	7.2429	9.85025	7.57539	8.75074	7.39845	7.66037
URIAAL_R01324	9.67663	10.0373	9.50214	9.69745	10.4051	9.8113
URIAAL_R10139	4.89196	4.65649	4.36355	4.36355	4.36355	4.65033
URIAAL_R10182	4.36355	4.36355	4.36355	4.36355	4.36355	4.36355
URIAAL_R10170	4.36355	4.36355	4.36355	4.36355	4.96566	4.36355
URIAAL_R01354	5.84658	7.57398	6.97224	7.45364	6.5392	6.98626
URIAAL_R10265	4.36355	4.36355	4.36355	4.82423	4.36355	4.36355
URIAAL_R01325	7.61018	7.78002	7.60665	7.68898	7.77083	7.55033
URIAAL_R10183	10.1348	10.7977	10.6522	10.1899	10.5204	10.3345
URIAAL_R01440	4.36355	4.77713	4.36355	4.36355	4.36355	4.76846
URIAAL_R01441	4.36355	4.36355	4.36355	5.37708	4.36355	4.36355
URIAAL_R15287	4.36355	4.36355	4.68598	4.36355	4.36355	4.36355
URIAAL_R01371	4.36355	4.36355	4.36355	4.82423	4.36355	4.36355
URIAAL_R01349	4.36355	4.36355	4.36355	4.82423	4.88592	4.65033
URIAAL_R01369	4.36355	4.36355	4.36355	4.36355	4.66624	4.36355
URIAAL_R15286	4.36355	4.36355	4.36355	4.36355	4.36355	4.36355
URIAAL_R01370	4.36355	4.36355	4.8186	4.36355	4.36355	4.36355
URIAAL_R10140	11.5746	11.7109	12.0584	12.1527	12.5989	10.7084
URIAAL_R10257	4.89196	5.50716	6.4769	5.95042	5.99125	5.29977
URIAAL_R10247	6.45974	6.46475	6.15728	5.89349	6.10117	5.89065
URIAAL_R10184	4.89196	4.36355	4.36355	4.36355	4.36355	4.93434
URIAAL_R10141	4.89196	4.36355	4.36355	5.08744	4.79084	4.36355
URIAAL_R01372	4.36355	4.36355	4.36355	4.36355	4.36355	4.36355
URIAAL_R01373	12.4213	13.5346	12.3982	12.7614	12.9134	11.8753
URIAAL_R10164	5.52047	6.16789	5.53966	4.82423	6.10117	5.91299
URIAAL_R10142	4.36355	4.94647	4.36355	5.27367	4.36355	4.65033
URIAAL_R10185	11.7958	11.5166	10.6147	10.8374	10.8056	12.0342
URIAAL_R10143	6.16091	6.98176	6.08699	6.17714	5.7338	6.05834
URIAAL_R01394	4.36355	4.36355	4.36355	4.82423	4.79084	4.36355
URIAAL_R01374	7.33466	6.98176	7.33464	7.24443	6.27691	6.79179
URIAAL_R10258	8.85153	10.562	9.65788	9.14588	9.88796	9.21184
URIAAL_R10171	7.7585	7.56087	8.2286	7.74036	8.35838	8.09293
URIAAL_R01447	6.24971	6.50814	6.49445	6.42611	5.81746	5.86786
URIAAL_R10186	4.36355	4.36355	4.36355	4.36355	4.36355	4.36355
URIAAL_R01437	4.36355	4.36355	4.36355	4.36355	4.66624	4.36355
URIAAL_R10187	9.02036	9.52936	9.53868	9.01011	9.89349	9.68961
URIAAL_R01326	4.36355	4.36355	4.36355	5.27367	4.36355	4.36355
URIAAL_R01375	7.67138	7.20269	6.94764	6.22222	6.88923	6.74703
URIAAL_R01376	12.8649	13.0047	13.0304	12.4458	13.2842	13.6353
URIAAL_R10188	4.36355	4.36355	4.36355	4.82423	4.36355	4.36355
URIAAL_R01327	4.89196	4.77713	5.2628	4.36355	5.43231	5.16567
URIAAL_R10144	11.4236	11.0653	10.874	10.0398	10.6079	12.0036
URIAAL_R01443	10.1384	10.6279	10.2708	10.4468	10.7273	10.8662
URIAAL_R10145	4.36355	4.36355	4.36355	4.36355	4.96566	4.36355
URIAAL_R01445	8.59899	10.6029	9.47934	7.90359	9.99088	8.3098
URIAAL_R01328	13.8006	13.1504	13.1678	13.051	13.5073	14.2282
URIAAL_R10189	4.36355	4.36355	4.36355	4.36355	4.36355	5.25757
URIAAL_R10146	6.61906	8.09715	6.38539	7.15983	5.47081	5.9564
URIAAL_R10190	9.74868	8.71427	9.84777	8.61287	9.31544	9.22962
URIAAL_R01431	5.96101	5.74747	5.7859	5.01234	5.15586	5.86786
URIAAL_R10241	4.73823	5.54055	5.72127	5.01234	5.70441	4.36355
URIAAL_R01329	9.80159	8.76327	10.1658	9.27735	8.87513	8.88267
URIAAL_R10246	4.36355	4.36355	4.36355	4.82423	4.36355	4.36355
URIAAL_R10245	8.04641	8.78018	8.35735	8.17213	8.50694	8.68469
URIAAL_R01330	10.619	11.5506	10.984	11.4339	10.5833	10.1601
URIAAL_R10191	7.90126	8.49274	7.5595	7.89715	7.87594	8.73264
URIAAL_R01377	10.9526	11.9742	11.0139	9.81576	10.7102	10.9103
URIAAL_R10147	4.36355	4.36355	4.36355	4.82423	4.36355	4.36355
URIAAL_R01378	7.8669	8.30273	8.80759	8.18801	8.33816	8.48164
URIAAL_R10148	11.4074	11.6411	11.5197	11.6924	10.1917	10.4459
URIAAL_R10192	8.98496	9.32404	10.0858	9.00416	9.941	9.76872
URIAAL_R01379	5.19227	5.94341	4.8186	7.45364	7.97382	5.89065
URIAAL_R10238	10.5918	10.2267	10.5031	9.55236	10.0278	9.86029
URIAAL_R01427	8.29871	7.15068	6.87104	7.53931	7.85325	6.44119
URIAAL_R10237	7.97568	8.02305	8.29204	7.53931	7.38257	8.24501
URIAAL_R01426	5.33896	5.57283	6.17984	5.37708	4.96566	5.4842
URIAAL_R10236	4.36355	4.36355	4.68598	5.08744	4.66624	4.36355
URIAAL_R10235	10.7405	11.5926	10.3597	10.418	9.96484	10.3553
URIAAL_R01331	8.05405	9.47338	7.65974	8.09562	9.04648	9.4845
URIAAL_R01425	5.10677	5.79979	5.41195	5.01234	6.41475	6.07771
URIAAL_R10234	4.73823	4.94647	4.36355	4.36355	5.3921	5.25757
URIAAL_R10233	4.36355	4.77713	4.36355	5.46951	5.7338	5.06039
URIAAL_R10232	6.33259	6.60412	6.81747	6.69725	6.86621	6.17017
URIAAL_R01424	4.89196	5.07511	5.53966	5.73705	5.47081	6.87709
URIAAL_R10231	14.6809	14.4729	13.8343	14.0931	14.838	14.5942
URIAAL_R01423	12.7279	12.8441	12.8883	12.5352	12.8185	12.6734
URIAAL_R01422	10.0763	10.9377	10.0313	10.5297	10.7549	10.3161
URIAAL_R10149	5.80569	5.82504	5.4565	5.27367	5.64302	4.85866
URIAAL_R10230	7.95948	9.17453	8.58847	8.68903	9.23271	9.42574
URIAAL_R10243	6.35905	7.06881	6.4769	7.04623	7.32553	7.58798
URIAAL_R10229	5.71901	5.82504	5.4565	5.55357	5.30566	5.06039
URIAAL_R10150	5.99676	6.6303	5.20637	5.83355	5.54337	5.16567
URIAAL_R10262	5.40361	5.82504	5.14539	5.2166	4.66624	4.36355
URIAAL_R01332	4.89196	5.43662	4.36355	4.82423	4.66624	5.00069
URIAAL_R10151	9.02036	8.31052	9.18872	9.09366	9.83144	8.89511
URIAAL_R10152	7.02311	7.11489	7.00833	6.8004	6.61135	6.84573
URIAAL_R01421	8.16407	7.98939	6.97224	7.02234	7.54808	6.82441
URIAAL_R10228	6.74181	7.25282	6.4769	6.34845	6.47847	7.03314
URIAAL_R10212	6.70213	7.56087	6.44108	6.10623	7.17644	7.60643
URIAAL_R14739	4.89196	4.36355	4.36355	5.15491	4.66624	4.93434
URIAAL_R01448	6.12982	7.07815	6.77585	6.8004	6.23996	6.53797
URIAAL_R10227	11.564	10.8196	12.028	10.9841	11.18	11.118
URIAAL_R01420	12.1639	12.721	12.4053	12.2041	12.3975	12.5022
URIAAL_R10153	5.99676	6.70588	6.57881	6.26573	6.3648	6.20527
URIAAL_R01333	4.36355	4.36355	4.36355	4.36355	4.36355	4.36355
URIAAL_R10226	4.73823	4.36355	4.36355	4.36355	4.79084	4.76846
URIAAL_R10154	8.59899	9.05239	9.54068	8.57722	9.31132	9.37694
URIAAL_R01334	4.36355	4.36355	4.36355	4.36355	4.79084	4.36355
URIAAL_R01335	5.57391	5.74747	5.95978	6.03089	4.66624	5.41495
URIAAL_R10155	10.1059	10.5341	10.3574	10.275	7.82436	9.31538
URIAAL_R10225	5.40361	5.47256	5.36507	4.92659	5.3921	5.33991
URIAAL_R01336	11.568	11.993	11.8514	11.3016	12.1013	11.9382
URIAAL_R01419	4.36355	4.36355	4.36355	5.27367	4.79084	4.65033
URIAAL_R01418	6.74181	6.95146	6.49445	5.77018	5.67416	6.44119
URIAAL_R01442	4.36355	4.36355	4.36355	4.36355	4.36355	4.36355
URIAAL_R01446	4.36355	4.36355	4.36355	4.36355	4.36355	4.36355
URIAAL_R01417	4.36355	4.94647	4.8186	5.55357	4.79084	4.36355
URIAAL_R01433	4.36355	4.36355	4.36355	4.36355	4.36355	4.36355
URIAAL_R01416	4.36355	4.94647	4.36355	4.82423	4.96566	4.36355
URIAAL_R01414	4.36355	4.36355	4.36355	4.36355	4.36355	4.36355
URIAAL_R01410	4.36355	4.36355	4.36355	4.36355	4.36355	4.36355
URIAAL_R01409	4.36355	4.36355	4.36355	4.36355	4.36355	4.36355
URIAAL_R01406	4.36355	4.36355	4.36355	4.36355	4.36355	4.36355
URIAAL_R01412	4.36355	4.36355	4.36355	4.36355	4.36355	4.36355
URIAAL_R01408	4.36355	4.36355	4.36355	4.36355	4.36355	4.36355
URIAAL_R01411	4.36355	4.36355	4.36355	4.36355	4.79084	4.36355
URIAAL_R01407	4.36355	4.36355	4.36355	4.36355	4.36355	4.36355
URIAAL_R01413	4.36355	4.36355	4.36355	4.92659	4.36355	4.36355
URIAAL_R01415	4.36355	4.65649	4.36355	4.36355	4.36355	4.36355
URIAAL_R10166	11.1122	11.3316	10.8597	9.77099	11.4857	11.2286
URIAAL_R01405	9.93933	9.55574	9.49802	9.28227	9.49179	10.1856
URIAAL_R10224	5.76322	5.72032	6.22374	5.59301	6.20188	6.74703
URIAAL_R10223	4.36355	4.36355	4.36355	5.32696	4.36355	5.77172
URIAAL_R10253	7.71076	7.24459	7.96643	6.71248	7.05051	7.18155
URIAAL_R01344	4.36355	4.36355	4.36355	5.15491	4.36355	4.36355
URIAAL_R01404	4.36355	4.77713	4.68598	5.70287	4.79084	4.36355
URIAAL_R01337	9.55862	9.73668	9.32981	9.2525	9.33184	9.08949
URIAAL_R10244	7.32191	7.47254	7.38982	7.02234	7.5969	6.93772
URIAAL_R10255	7.30905	7.15949	7.15463	6.61837	7.01974	6.67694
URIAAL_R10261	7.93482	7.54764	7.68921	7.06971	7.61054	7.35998
URIAAL_R01403	15.7329	15.7923	15.8615	15.4639	16.8303	15.3051
URIAAL_R10169	10.2748	10.7291	11.0239	10.8164	11.1241	10.7383
URIAAL_R10156	9.04731	8.7172	9.0744	9.37036	8.6933	8.09293
URIAAL_R10222	5.00894	4.36355	4.36355	4.36355	5.09837	4.36355
URIAAL_R10221	4.36355	4.36355	4.36355	4.36355	4.36355	4.36355
URIAAL_R10168	4.73823	4.65649	4.36355	5.01234	4.66624	4.36355
URIAAL_R10167	4.36355	4.36355	4.36355	4.36355	5.2091	4.76846
URIAAL_R10157	4.36355	4.36355	4.36355	4.82423	4.36355	5.06039
URIAAL_R10158	4.36355	4.36355	4.36355	5.01234	4.36355	4.36355
URIAAL_R10264	4.36355	4.36355	4.68598	4.36355	4.36355	4.36355
URIAAL_R01347	4.36355	4.36355	4.36355	5.32696	4.96566	4.65033
URIAAL_R01338	9.56928	9.65516	9.69612	9.38644	9.46974	10.0321
URIAAL_R01402	11.269	10.0582	10.7575	11.0705	10.4395	10.1035
URIAAL_R01401	12.0311	12.2098	12.3167	11.9526	12.4928	12.1607
URIAAL_R01353	5.26897	4.94647	5.2628	4.68999	4.96566	4.76846
URIAAL_R01400	4.36355	4.36355	4.36355	6.48142	4.36355	4.36355
URIAAL_R01348	5.76322	6.07106	6.30716	6.38787	6.20188	6.15223
URIAAL_R01399	12.354	12.5467	12.8639	12.2147	12.7983	12.2994
URIAAL_R15385	7.68133	8.69359	8.88855	7.95408	8.62497	8.70745
URIAAL_R10260	8.96491	9.85291	10.0775	9.40008	9.57334	9.92473
URIAAL_R01345	11.1221	11.4567	11.1843	10.7372	11.2469	11.4581
URIAAL_R10193	4.36355	4.65649	4.36355	4.36355	5.03553	4.85866
URIAAL_R01430	8.80715	9.11364	8.92278	8.4819	8.88906	8.01265
URIAAL_R01339	13.5623	15.1137	14.408	13.746	14.6594	13.2037
URIAAL_R10163	5.71901	7.21117	6.44108	7.88418	5.43231	6.03865
URIAAL_R10219	11.2434	11.6995	11.2481	10.6266	11.5804	11.72
URIAAL_R10256	4.36355	4.36355	4.36355	4.36355	4.36355	4.36355
URIAAL_R10203	4.36355	4.36355	4.36355	4.36355	4.36355	4.36355
URIAAL_R01398	5.80569	6.11073	6.51176	5.66754	6.70618	6.68888
URIAAL_R10218	12.6743	11.8922	12.6026	12.3176	12.7625	11.8047
URIAAL_R10259	9.52345	9.12911	9.56056	9.70296	10.2271	10.0083
URIAAL_R01397	4.89196	4.36355	4.36355	5.92231	4.79084	4.36355
URIAAL_R10217	4.36355	5.07511	4.36355	5.15491	4.79084	4.36355
URIAAL_R10216	7.61018	8.15896	6.71826	7.24443	7.01974	8.21745
URIAAL_R10215	11.6379	11.1232	10.5811	9.7987	11.0505	10.6318
URIAAL_R01340	11.4082	10.1368	11.427	10.2688	11.1578	10.7119
URIAAL_R10214	11.1526	11.0317	11.0375	11.0235	10.8786	10.9614
URIAAL_R10213	9.70347	9.29692	9.56647	9.23738	8.09947	8.93663
URIAAL_R10159	8.75671	8.86712	8.93503	8.6816	8.21495	8.81355
URIAAL_R01341	6.35905	7.24459	6.4769	6.19989	5.79028	6.83511
URIAAL_R01342	8.9929	8.56286	10.037	8.2089	8.68374	10.04
URIAAL_R10211	10.4777	10.4697	10.4033	10.4303	10.1121	10.7911
URIAAL_R10242	7.95131	7.3556	8.6343	7.96027	8.06539	8.8214
URIAAL_R10220	4.36355	4.36355	4.36355	5.08744	5.09837	4.36355
URIAAL_R10160	4.36355	5.50716	6.44108	6.03089	5.15586	4.76846
URIAAL_R10161	11.9999	12.7974	12.5216	12.1714	12.7519	12.6575
URIAAL_R01396	11.3805	11.234	11.5121	11.1303	11.3369	11.4092
URIAAL_R10210	11.0249	10.9539	10.9331	10.3921	10.7812	11.1421
URIAAL_R10209	6.85424	6.03003	6.68852	5.08744	7.42968	5.72028
URIAAL_R10165	9.5452	9.29692	9.46042	8.87654	9.46045	10.0174
URIAAL_R01343	6.7992	6.30851	7.94224	6.28692	7.9473	7.70666
URIAAL_R10162	9.8764	10.4122	10.5276	9.48784	10.5015	9.98409
URIAAL_R01395	7.74908	7.42983	8.10353	8.49045	6.97761	8.951
URIAAL_R10208	5.26897	5.89754	6.26615	5.55357	5.3921	6.55123
URIAAL_R10207	7.43263	6.35742	7.6819	6.24417	6.69304	6.41215
URIAAL_R10206	4.36355	4.94647	5.00448	5.92231	4.66624	4.65033
URIAAL_R10201	4.89196	4.36355	4.36355	4.36355	4.36355	4.36355
URIAAL_R10136	5.40361	4.36355	4.36355	4.36355	4.79084	4.36355
URIAAL_R01386	12.9127	12.5225	12.8954	12.2412	12.2262	12.3003
URIAAL_R01385	8.06922	8.55305	7.8799	7.64341	8.47029	7.97546
URIAAL_R10200	5.33896	4.65649	4.8186	4.36355	4.36355	4.36355
URIAAL_R10132	5.40361	5.57283	5.14539	5.95042	5.2091	5.16567
URIAAL_R10199	8.11378	8.06058	8.87272	7.36241	8.95146	7.85255
URIAAL_R10198	11.2476	11.8874	11.144	10.7219	11.8405	11.5777
URIAAL_R01384	5.26897	4.65649	4.36355	4.36355	4.96566	4.36355
URIAAL_R01383	4.36355	4.36355	4.36355	4.36355	4.79084	4.36355
URIAAL_R15288	4.36355	4.36355	4.36355	4.36355	4.36355	4.36355
URIAAL_R15289	4.36355	4.36355	4.36355	4.36355	4.36355	4.36355
URIAAL_R15292	4.36355	4.36355	4.36355	4.36355	4.66624	4.36355
URIAAL_R15290	4.36355	4.36355	4.36355	4.36355	4.36355	4.36355
[truncated: 13,597 more rows]

## Sheet: control vs. oil
	oiled1	oiled2	oiled3	control1	control2	control3
URIAAL_R14263	7.02659	6.17234	5.3778	6.05277	6.95779	6.24043
URIAAL_R14694	5.31595	5.37559	5.25352	5.71557	5.09334	4.75236
URIAAL_R09903	6.05955	6.43087	6.97305	7.95857	6.51526	6.40691
URIAAL_R14262	9.78507	9.70924	9.61551	9.89413	9.69116	9.81682
URIAAL_R09911	4.33045	4.91156	4.33045	4.33045	4.33045	4.33045
URIAAL_R14261	8.37405	7.96146	7.89953	7.92574	9.39036	7.99089
URIAAL_R09910	10.3211	9.79596	8.84369	11.4912	10.3506	9.71037
URIAAL_R14270	12.8389	12.7809	13.0983	12.3151	13.5202	12.2553
URIAAL_R09909	4.33045	4.33045	4.33045	4.33045	4.33045	4.33045
URIAAL_R15466	4.33045	4.33045	4.33045	4.91391	4.33045	4.33045
URIAAL_R14269	4.33045	4.33045	4.33045	4.33045	4.7743	4.33045
URIAAL_R09905	4.33045	4.33045	4.33045	4.33045	4.33045	4.33045
URIAAL_R09904	9.92526	10.2513	10.973	10.0461	10.7485	10.559
URIAAL_R14268	13.4088	13.8308	13.5847	11.8561	12.928	13.2411
URIAAL_R09902	7.43828	7.37262	7.06997	6.83963	7.72149	8.15424
URIAAL_R14273	7.07489	6.64615	5.92723	5.32794	6.62213	5.62547
URIAAL_R14267	6.39616	5.6365	5.88095	5.47508	5.6567	5.98418
URIAAL_R14266	8.56847	8.01195	7.81405	8.03441	7.70819	8.55871
URIAAL_R14260	5.26152	5.90577	5.72951	5.15015	4.95573	5.53004
URIAAL_R15542	4.99443	4.33045	4.33045	4.33045	4.33045	4.33045
URIAAL_R14265	4.33045	4.33045	4.33045	5.42861	4.33045	4.33045
URIAAL_R14264	4.33045	4.33045	4.33045	4.33045	4.33045	4.33045
URIAAL_R09901	4.33045	4.33045	4.33045	4.33045	5.02819	4.33045
URIAAL_R14271	4.33045	4.33045	4.33045	5.00267	4.33045	4.33045
URIAAL_R09906	4.66463	4.33045	4.33045	4.33045	4.33045	4.33045
URIAAL_R09908	9.06046	9.23097	9.61707	9.04629	8.67495	9.26623
URIAAL_R09900	9.35882	9.78156	10.0691	9.2864	9.42302	9.67867
URIAAL_R14274	4.33045	4.33045	4.33045	4.33045	4.33045	4.84627
URIAAL_R14272	4.33045	4.33045	4.33045	4.33045	4.33045	4.33045
URIAAL_R15541	4.33045	4.33045	4.33045	4.33045	4.64492	4.33045
URIAAL_R11255	8.50511	8.29763	8.21041	7.24886	8.19082	8.15864
URIAAL_R11256	7.34374	7.41106	7.45211	7.12547	7.81127	6.83027
URIAAL_R11257	10.9313	10.511	10.7942	10.0997	11.0457	10.6039
URIAAL_R09980	11.9929	12.5767	12.2627	11.4063	12.1273	12.3268
URIAAL_R09981	9.79215	10.123	10.3623	10.4032	10.1749	9.83336
URIAAL_R11252	12.4142	12.3972	12.3434	11.9389	12.4059	11.8867
URIAAL_R09985	4.33045	4.33045	4.33045	4.33045	4.33045	4.33045
URIAAL_R11253	4.33045	4.33045	4.33045	4.33045	4.33045	4.33045
URIAAL_R09982	5.36713	4.33045	4.33045	4.66883	4.95573	4.33045
URIAAL_R11258	8.13232	6.32947	7.31783	7.20525	9.09581	6.79582
URIAAL_R09983	10.0879	9.1151	9.10301	9.38815	9.22419	9.79868
URIAAL_R09986	5.14018	4.33045	5.05022	4.66883	4.33045	4.33045
URIAAL_R09984	5.46148	5.07737	5.10659	6.65401	5.94214	4.92503
URIAAL_R11254	5.92298	6.17234	5.61535	7.77892	6.80037	6.52613
URIAAL_R09987	9.38482	9.36985	9.16006	9.13181	9.05207	9.04241
URIAAL_R14728	10.1986	9.84005	10.0344	9.66027	10.357	9.9224
URIAAL_R11695	5.83261	6.19603	6.26139	6.86823	5.99152	6.56817
URIAAL_R11826	10.6693	10.5434	10.8018	9.46286	9.5688	10.6388
URIAAL_R11696	9.15691	8.96695	8.99133	9.3493	9.35482	9.97926
URIAAL_R01746	7.29397	8.21399	8.01405	7.74161	7.54548	8.49411
URIAAL_R01747	4.66463	4.33045	4.98862	5.00267	4.64492	4.33045
URIAAL_R11751	4.33045	4.33045	4.74887	5.08036	4.33045	4.33045
URIAAL_R01696	11.8011	11.9358	12.0197	12.1653	12.6262	11.9926
URIAAL_R01697	5.58747	5.9353	5.4519	6.47674	6.3636	6.51181
URIAAL_R01740	7.78504	6.87396	6.85786	10.557	10.8115	8.16303
URIAAL_R11697	4.66463	4.99998	4.92014	5.64151	6.06192	5.21473
URIAAL_R01748	8.42974	8.35241	9.02244	9.20983	9.37791	8.95177
URIAAL_R11752	8.15456	8.10787	8.57956	9.26045	9.03102	8.10489
URIAAL_R11698	4.90672	4.33045	4.33045	4.80791	4.873	4.62931
URIAAL_R11753	10.0994	9.82959	10.133	9.64431	9.64519	9.83473
URIAAL_R01749	12.3289	11.7652	11.9601	12.8012	12.4317	12.0621
URIAAL_R01750	10.3235	10.0825	10.3139	11.8435	11.3166	10.6713
URIAAL_R11739	4.802	6.41122	6.63242	5.64151	6.66542	6.32639
URIAAL_R11754	7.08671	5.21042	5.4519	7.93237	7.48418	6.12881
URIAAL_R01698	4.90672	4.80598	4.33045	5.00267	4.33045	4.33045
URIAAL_R01751	6.11008	5.37559	4.33045	4.80791	5.09334	4.33045
URIAAL_R01738	8.97897	9.37225	9.04126	8.88573	9.54303	9.33952
URIAAL_R11738	5.73431	6.57823	6.94258	5.47508	6.98048	6.37531
URIAAL_R11821	4.99443	6.32947	6.29534	4.91391	6.12843	5.98418
URIAAL_R11699	7.63425	7.29241	7.7693	6.65401	7.0356	7.31282
URIAAL_R11755	10.4949	10.511	11.2136	9.91589	10.686	10.8003
URIAAL_R11756	11.0001	10.7871	11.4313	9.93732	10.2243	10.7947
URIAAL_R11750	9.27284	9.62505	9.98792	9.46513	9.40882	9.32983
URIAAL_R01752	7.37278	6.61263	6.73199	5.91165	5.43905	5.59465
URIAAL_R01753	6.05955	4.80598	5.78232	8.29781	6.0845	6.42243
URIAAL_R01699	4.33045	4.33045	4.33045	5.37969	6.70735	4.33045
URIAAL_R11831	4.33045	4.33045	4.33045	4.33045	4.33045	4.33045
URIAAL_R11757	4.66463	4.33045	4.62683	4.33045	4.33045	4.33045
URIAAL_R11758	4.66463	4.33045	4.33045	4.33045	4.33045	4.33045
URIAAL_R01754	4.33045	4.33045	4.33045	4.33045	4.33045	4.33045
URIAAL_R11759	4.802	4.33045	4.33045	4.33045	4.33045	4.33045
URIAAL_R11760	4.33045	4.33045	4.33045	4.33045	4.33045	4.33045
URIAAL_R11700	4.802	4.33045	4.33045	5.08036	4.64492	4.33045
URIAAL_R11832	4.33045	4.33045	4.33045	4.33045	4.33045	4.33045
URIAAL_R11833	4.33045	4.33045	4.33045	4.33045	4.33045	4.33045
URIAAL_R14975	4.33045	4.33045	4.33045	4.33045	4.33045	4.33045
URIAAL_R11761	4.33045	4.33045	4.33045	4.33045	4.33045	4.33045
URIAAL_R11762	4.33045	4.33045	4.33045	4.33045	4.95573	4.33045
URIAAL_R01755	6.03346	6.71077	5.99336	5.78484	6.12843	6.89666
URIAAL_R11763	4.802	5.07737	4.33045	5.00267	4.873	5.16556
URIAAL_R01756	7.18874	7.39197	7.21215	6.10484	6.21183	5.6554
URIAAL_R11764	4.33045	4.80598	4.33045	4.33045	4.64492	4.33045
URIAAL_R01757	5.83261	6.09839	6.0146	5.64151	5.68884	5.21473
URIAAL_R11702	4.802	4.33045	4.33045	4.33045	4.33045	4.33045
URIAAL_R14973	7.55237	7.64624	7.65083	6.47674	6.77444	6.85276
URIAAL_R01743	5.46148	5.74539	5.85709	5.75076	5.77984	5.4243
URIAAL_R11765	4.33045	4.33045	4.33045	5.27289	4.64492	5.05614
URIAAL_R11703	11.8948	11.9742	12.405	10.5474	11.7304	11.8768
URIAAL_R11767	4.33045	4.33045	4.33045	4.80791	4.33045	4.33045
URIAAL_R01758	4.33045	4.33045	4.33045	4.33045	4.95573	4.33045
URIAAL_R01759	5.20321	5.51478	5.10659	4.91391	5.47885	5.30481
URIAAL_R01700	5.0712	6.30819	6.20867	5.88125	6.10666	5.91635
URIAAL_R11823	7.47438	7.86166	7.24553	7.11369	6.8258	8.0395
URIAAL_R01701	5.14018	5.81233	5.61535	5.51938	5.30804	5.26101
URIAAL_R11704	4.802	4.80598	5.1588	5.00267	5.20807	4.62931
URIAAL_R01830	10.27	8.16471	8.74953	10.764	9.85718	8.71002
URIAAL_R11768	6.22796	6.28655	5.48686	5.85003	5.55383	5.962
URIAAL_R11705	10.9909	11.2414	11.1859	11.4789	10.7613	11.4011
URIAAL_R01760	14.1498	13.8383	13.6102	14.8349	11.7821	13.7488
URIAAL_R11706	7.06297	7.39197	7.5079	5.60241	6.46665	6.84156
URIAAL_R11707	8.64882	8.29254	9.03188	7.9843	8.81092	8.5045
URIAAL_R01761	8.92519	8.33273	8.82209	8.52455	7.66062	8.76289
URIAAL_R11749	4.33045	4.99998	4.33045	4.33045	4.873	4.33045
URIAAL_R01762	6.47264	6.84572	6.20867	7.01563	6.86309	8.02026
URIAAL_R11708	4.33045	4.33045	5.25352	4.33045	4.95573	5.16556
URIAAL_R01805	6.84271	5.96409	5.99336	6.88231	6.72104	6.69939
URIAAL_R01763	4.99443	4.80598	4.84202	5.00267	4.33045	4.33045
URIAAL_R11769	6.35615	5.26918	5.3778	5.15015	5.55383	5.05614
URIAAL_R01820	10.5344	10.5348	10.8938	9.63828	10.3496	10.7663
URIAAL_R01821	9.97897	10.3472	10.5528	9.25258	9.95112	10.2851
URIAAL_R11770	4.33045	4.33045	4.33045	5.27289	4.33045	4.33045
URIAAL_R01703	7.66572	8.06072	7.13398	8.54192	8.17646	8.08651
URIAAL_R01702	11.0716	10.3917	11.2053	9.92252	10.8245	10.9038
URIAAL_R11771	6.13458	5.47063	6.24406	5.75076	5.62354	6.20433
URIAAL_R11742	7.64219	6.26452	5.64508	10.0716	6.03891	7.80073
URIAAL_R11772	6.49107	6.67885	5.83272	5.37969	5.43905	6.64845
URIAAL_R01764	11.7333	10.9038	11.3121	11.0318	10.9848	11.3503
URIAAL_R11709	10.5035	9.00157	9.6769	9.11453	10.1749	9.94414
URIAAL_R01704	7.16671	4.91156	5.99336	6.45762	6.92305	6.14813
URIAAL_R11747	6.05955	5.6365	5.52058	6.02586	5.94214	5.68449
URIAAL_R11710	7.06297	6.59554	7.00285	6.73449	6.25152	7.23899
URIAAL_R01816	5.0712	5.55702	5.67397	4.33045	5.43905	5.84429
URIAAL_R01819	5.54724	5.32403	5.52058	5.21391	5.62354	5.4243
URIAAL_R01695	6.25025	6.12354	6.40751	6.20276	6.19151	6.08923
URIAAL_R11773	4.33045	4.33045	4.62683	5.91165	4.7743	4.84627
URIAAL_R11711	5.36713	5.07737	5.29699	6.33656	6.17084	5.62547
URIAAL_R11774	10.5923	10.4768	10.3013	10.5345	10.8261	10.6127
URIAAL_R11820	4.99443	5.59753	4.92014	5.00267	4.95573	5.34646
URIAAL_R11825	7.79927	8.6433	8.56009	8.24037	6.48306	8.15424
URIAAL_R11822	7.49209	7.81258	8.33032	6.91003	6.57739	7.86158
URIAAL_R01705	13.3645	14.115	14.2602	11.4134	12.533	13.5069
URIAAL_R11712	12.8983	13.8203	13.7952	12.2252	12.5713	12.8712
URIAAL_R01765	11.9193	12.1779	12.6045	11.1181	11.957	11.4639
URIAAL_R11775	13.5956	13.5	13.4943	13.0016	13.7382	13.3894
URIAAL_R11776	8.52654	8.81245	9.59179	6.88231	7.74121	8.57852
URIAAL_R11713	6.15859	5.90577	5.78232	6.31522	5.94214	6.10918
URIAAL_R14791	11.446	10.9179	11.3975	10.9668	11.8687	12.0465
URIAAL_R11777	6.27215	6.24211	6.1347	6.63732	6.66542	6.34291
URIAAL_R01766	6.74052	5.47063	5.7021	5.15015	5.35389	6.14813
URIAAL_R01767	4.33045	4.33045	4.33045	4.33045	4.33045	4.33045
URIAAL_R01768	4.33045	4.33045	4.33045	5.27289	4.33045	4.33045
URIAAL_R11778	4.33045	4.91156	4.33045	5.00267	4.7743	4.33045
URIAAL_R11779	4.33045	4.33045	4.33045	4.33045	4.873	4.33045
URIAAL_R11780	4.33045	5.55702	4.33045	4.33045	4.95573	4.33045
URIAAL_R11827	4.33045	4.33045	4.33045	4.33045	4.33045	4.33045
URIAAL_R01769	9.34444	7.94855	8.02834	10.6892	9.50349	9.00635
URIAAL_R01706	4.33045	4.33045	4.33045	5.08036	4.64492	4.33045
URIAAL_R01707	5.54724	4.99998	5.1588	6.10484	4.64492	5.62547
URIAAL_R11824	6.20527	6.67885	5.99336	5.21391	5.72003	6.10918
URIAAL_R11714	11.5514	11.8739	11.8419	11.6583	11.6552	11.2619
URIAAL_R01708	8.98517	8.97648	8.4159	9.68972	9.31185	8.37071
URIAAL_R01770	6.72527	7.30269	6.91143	7.14874	7.12959	6.85276
URIAAL_R11737	8.23501	8.24593	8.89116	8.50253	7.98643	8.76864
URIAAL_R01709	7.97237	8.26683	8.11114	8.94562	8.06134	8.50795
URIAAL_R11781	7.24235	7.30269	6.40751	9.57023	8.30953	7.85615
URIAAL_R01710	7.50958	8.09037	7.41608	8.2243	8.40691	8.06789
URIAAL_R11782	4.33045	4.33045	4.33045	6.179	5.35389	4.92503
URIAAL_R01711	4.33045	4.99998	4.33045	5.91165	4.64492	4.33045
URIAAL_R01737	6.39616	5.96409	5.55318	6.31522	5.77984	6.08923
URIAAL_R01771	4.33045	4.33045	4.33045	4.91391	4.33045	4.33045
URIAAL_R01731	4.33045	4.33045	4.33045	5.71557	5.20807	4.75236
URIAAL_R11783	5.41552	5.59753	4.62683	6.33656	5.6567	6.20433
URIAAL_R01732	4.33045	4.33045	4.33045	5.42861	4.33045	4.33045
URIAAL_R11743	4.802	4.33045	4.33045	5.42861	4.33045	5.26101
URIAAL_R01712	5.46148	6.07271	5.75623	7.18292	5.51706	5.81922
URIAAL_R11745	9.4974	9.66678	9.25376	9.77646	9.31621	9.39818
URIAAL_R11784	8.05162	8.09623	8.02359	10.1917	7.49199	8.77723
URIAAL_R15299	6.7556	6.71077	6.51069	7.47622	7.0356	6.99054
URIAAL_R11785	9.62381	9.223	9.45124	10.2108	9.53745	9.49151
URIAAL_R01772	7.37278	7.62196	7.25375	7.53869	6.80037	7.7606
URIAAL_R11701	4.99443	5.14689	5.4519	6.43822	5.02819	5.53004
URIAAL_R11715	5.73431	5.42433	5.88095	5.71557	5.20807	6.35921
URIAAL_R11786	7.5857	8.0667	7.27813	7.99066	7.42827	7.85615
URIAAL_R01713	10.497	10.2565	10.2159	11.3416	10.6952	10.8953
URIAAL_R11716	7.29397	7.96146	7.92522	8.74297	7.77348	8.0632
URIAAL_R01773	11.8683	12.155	11.9873	12.2114	11.9708	11.9379
URIAAL_R11736	9.45788	9.6351	9.69482	9.77646	9.58513	9.80987
URIAAL_R01714	9.27284	9.49208	10.0461	10.3913	9.2608	10.5415
URIAAL_R01774	6.8143	6.12354	6.69551	7.47622	6.70735	6.93918
URIAAL_R01775	5.26152	4.80598	4.92014	6.20276	4.95573	4.84627
URIAAL_R11741	4.802	4.80598	5.33833	5.51938	5.02819	5.56286
URIAAL_R11748	4.802	4.91156	4.98862	5.47508	4.95573	5.05614
URIAAL_R11787	8.29125	7.92896	7.41608	6.6705	7.9754	8.08651
URIAAL_R11788	5.83261	6.12354	6.20867	7.08982	5.25958	6.14813
URIAAL_R01715	10.9192	10.4257	9.89281	13.3781	12.5049	11.1547
URIAAL_R15301	4.66463	4.80598	4.92014	4.33045	4.95573	5.26101
URIAAL_R15300	4.33045	5.6365	4.33045	4.91391	4.95573	4.33045
URIAAL_R01776	7.36317	7.21823	7.01264	7.89214	7.86013	6.84156
URIAAL_R11733	12.8691	12.969	12.684	13.2179	13.8231	12.3557
URIAAL_R01777	13.2222	13.2945	13.7275	13.2529	13.8677	13.3067
URIAAL_R01779	4.33045	4.33045	4.62683	4.33045	4.64492	4.62931
URIAAL_R01716	12.0994	12.2738	12.8459	11.7673	11.8051	12.065
URIAAL_R01780	5.36713	4.33045	5.1588	4.33045	4.64492	4.33045
URIAAL_R01778	11.3776	11.608	11.2853	11.3698	12.3393	11.2507
URIAAL_R11789	9.03679	8.41924	8.73803	8.64194	8.63361	8.18045
URIAAL_R01781	7.8616	7.64624	8.03306	7.90567	7.95308	7.1065
URIAAL_R11790	4.33045	5.32403	4.33045	5.21391	4.33045	5.26101
URIAAL_R11791	10.8865	10.5582	10.965	10.422	11.1602	10.6341
URIAAL_R14790	4.33045	4.33045	4.33045	5.00267	4.7743	4.33045
URIAAL_R11792	4.33045	4.33045	4.33045	5.21391	4.33045	4.33045
URIAAL_R11717	4.33045	4.33045	4.33045	4.80791	4.33045	4.33045
URIAAL_R11793	5.76806	5.07737	4.74887	6.51416	5.55383	5.7673
URIAAL_R01782	4.99443	4.99998	4.84202	6.02586	5.30804	5.16556
URIAAL_R11735	6.93774	7.55511	7.12501	8.43439	7.34431	7.67059
URIAAL_R11794	7.84798	8.05471	8.41229	9.27608	7.80504	8.51483
URIAAL_R01783	11.7758	12.0194	11.8595	11.9474	11.3488	11.5942
URIAAL_R11740	6.20527	6.21928	6.27848	7.29115	5.77984	6.49733
URIAAL_R11718	11.5985	11.5077	11.5443	11.1565	11.1554	11.3965
URIAAL_R01784	8.7025	8.71716	8.65182	8.97465	8.88614	8.698
URIAAL_R11719	11.3115	11.0558	11.2089	11.7431	11.637	11.184
URIAAL_R01717	10.0172	10.3521	10.4423	9.90254	9.97746	10.1174
URIAAL_R01785	6.20527	6.07271	6.59308	6.8251	7.3269	6.78414
URIAAL_R11795	11.0511	10.6699	11.2838	10.0445	10.3748	10.8411
URIAAL_R01718	7.09842	7.09303	7.6069	8.02205	7.19851	7.43515
URIAAL_R01742	10.6353	10.1414	10.5405	11.6017	11.5464	10.1049
URIAAL_R11732	5.76806	4.33045	5.58474	5.71557	5.58928	5.84429
URIAAL_R01786	5.31595	6.19603	7.30209	7.58167	7.08861	6.86387
URIAAL_R01787	4.33045	4.33045	4.33045	4.33045	4.33045	4.33045
URIAAL_R01788	7.21044	7.99323	8.15515	7.20525	7.47633	8.1674
URIAAL_R11796	7.23179	7.12831	6.5797	7.38186	6.66542	7.6137
URIAAL_R01789	5.41552	6.19603	6.46747	4.66883	6.51526	6.56817
URIAAL_R11819	9.93808	9.82081	10.0012	9.28383	9.9925	9.7267
URIAAL_R01790	10.1622	10.4152	10.6042	10.5431	10.8726	10.8336
URIAAL_R11797	9.26268	8.91508	8.71183	8.55908	8.69852	8.81943
URIAAL_R15298	10.1663	10.1913	10.9207	9.88567	9.90996	10.6652
URIAAL_R01828	7.84113	7.57212	8.34937	7.27017	7.69476	7.94568
URIAAL_R11798	5.83261	6.17234	6.53873	6.05277	5.99152	6.86387
URIAAL_R11799	4.33045	4.80598	4.33045	4.33045	4.7743	4.92503
URIAAL_R11720	5.26152	4.91156	4.62683	4.33045	4.33045	4.33045
URIAAL_R01739	5.46148	4.91156	4.74887	5.42861	5.20807	5.46087
URIAAL_R11800	4.99443	4.33045	5.33833	5.00267	5.15292	4.75236
URIAAL_R11801	4.90672	5.37559	5.33833	4.33045	5.35389	5.56286
URIAAL_R11802	6.7556	7.27161	6.85786	6.24896	6.59247	7.11574
URIAAL_R01791	12.2932	11.9567	11.9949	9.85654	11.5113	12.1536
URIAAL_R11734	6.67845	6.5249	6.53873	8.27199	6.81314	6.97023
URIAAL_R01813	5.92298	6.43087	5.78232	6.13006	5.75035	5.7404
URIAAL_R11803	8.52228	7.27161	8.11114	9.61799	8.77653	8.19338
URIAAL_R11830	6.62992	6.39127	6.80209	7.65589	6.86309	6.51181
URIAAL_R01792	12.4685	11.0218	10.8841	13.2144	12.4693	11.815
URIAAL_R11744	8.00338	7.98693	7.11599	7.94553	8.19082	8.65202
URIAAL_R01793	4.802	4.33045	4.33045	4.80791	5.02819	4.75236
URIAAL_R01808	4.33045	4.33045	4.33045	4.33045	4.33045	4.33045
URIAAL_R11721	4.33045	4.33045	4.33045	4.66883	4.873	4.33045
URIAAL_R11804	10.907	11.0087	11.0614	10.6853	10.9502	10.9187
URIAAL_R01794	13.6656	12.2443	12.0631	13.1581	13.7616	12.5899
URIAAL_R01736	13.9316	13.5554	14.3365	13.5997	14.6506	13.0511
URIAAL_R11805	12.652	12.8183	12.9857	12.0528	12.5405	12.4566
URIAAL_R01795	4.802	4.33045	4.74887	4.80791	4.95573	4.75236
URIAAL_R01796	10.0442	10.607	10.5544	9.10872	10.1249	10.143
URIAAL_R01797	6.50925	6.4693	5.58474	5.97014	6.06192	5.4243
URIAAL_R01817	11.9237	12.4333	12.3347	11.872	10.6451	11.6813
URIAAL_R01806	10.6274	10.1899	10.5479	11.3878	10.2844	10.2393
URIAAL_R14974	10.5852	10.2591	9.83743	9.8496	10.379	10.1342
URIAAL_R01798	10.8101	10.4979	10.5779	9.75247	10.0589	10.3857
URIAAL_R01735	4.33045	4.33045	4.33045	4.33045	4.33045	4.33045
URIAAL_R11722	5.69947	5.9353	5.29699	5.64151	4.873	5.7404
URIAAL_R01799	4.33045	4.33045	4.92014	4.33045	4.7743	5.49607
URIAAL_R01800	7.06297	6.61263	7.89434	6.02586	6.69352	7.14309
URIAAL_R11806	10.1332	10.1201	10.3321	10.1528	9.94129	10.1275
URIAAL_R01719	9.43318	9.20422	9.13182	9.17413	9.5149	9.79305
URIAAL_R01734	6.50925	6.96844	6.70778	6.27143	6.76129	6.94961
URIAAL_R01733	4.33045	4.33045	4.74887	4.66883	5.72003	4.33045
URIAAL_R11807	5.26152	6.21928	5.58474	6.15477	7.18887	6.06894
URIAAL_R01812	8.49645	7.48493	6.7675	9.05839	8.52096	6.77235
URIAAL_R01832	5.58747	5.74539	5.61535	6.71878	5.89057	5.34646
URIAAL_R11808	10.3798	10.6621	10.9997	10.1598	10.1653	10.8302
URIAAL_R01801	12.4168	12.5239	13.1745	11.5078	12.5156	12.6549
URIAAL_R01720	12.4541	12.3943	12.2229	12.09	12.5028	11.961
URIAAL_R11723	13.0795	12.8813	13.1853	12.3521	13.3174	12.9786
URIAAL_R01721	4.33045	4.33045	5.25352	4.33045	4.33045	5.16556
URIAAL_R01722	4.66463	4.33045	4.33045	4.33045	4.7743	4.33045
URIAAL_R11809	4.33045	4.33045	4.33045	5.15015	5.15292	4.75236
URIAAL_R11810	6.20527	6.57823	6.65802	6.41852	7.3785	7.07842
URIAAL_R01811	9.2473	9.33575	9.56281	8.38228	9.02305	9.64157
URIAAL_R01826	9.43544	9.11797	9.52824	8.61758	9.38207	9.56437
URIAAL_R01723	8.64098	8.29763	8.30323	8.57604	8.536	8.61733
URIAAL_R01822	4.33045	4.33045	4.33045	4.33045	4.33045	4.33045
URIAAL_R11724	4.33045	4.80598	4.33045	4.33045	4.33045	4.33045
URIAAL_R01802	4.33045	4.33045	4.33045	4.33045	4.33045	4.33045
URIAAL_R01809	4.33045	4.33045	4.33045	4.80791	4.33045	4.33045
URIAAL_R01810	4.33045	4.33045	4.33045	4.33045	4.33045	4.33045
URIAAL_R01744	4.33045	4.33045	4.33045	4.33045	4.33045	4.33045
URIAAL_R01827	4.33045	4.33045	4.33045	4.33045	4.64492	4.33045
URIAAL_R11811	4.802	4.33045	5.1588	4.33045	4.33045	4.33045
URIAAL_R01724	4.90672	4.33045	4.33045	4.33045	4.33045	4.33045
URIAAL_R11812	4.33045	4.80598	4.33045	5.00267	5.58928	4.33045
URIAAL_R11725	4.33045	4.66746	4.33045	4.33045	4.33045	4.33045
URIAAL_R01725	4.33045	4.33045	4.33045	4.33045	4.33045	4.33045
URIAAL_R01726	8.53079	7.38233	8.06573	9.24466	8.77969	9.27635
URIAAL_R11746	11.5144	11.912	12.0478	10.8902	11.5108	11.6482
URIAAL_R01727	4.802	4.33045	5.05022	5.21391	4.33045	4.75236
URIAAL_R11813	5.76806	6.87396	5.83272	6.31522	5.55383	5.7673
URIAAL_R11731	12.0861	11.3982	11.3884	11.0356	12.0455	11.153
URIAAL_R11730	4.33045	4.33045	4.62683	4.33045	4.33045	4.33045
URIAAL_R11726	12.7593	12.9575	12.9614	12.1847	12.4629	12.3486
URIAAL_R01745	5.46148	4.33045	5.4519	8.07087	4.7743	5.11295
URIAAL_R11828	9.52316	9.12655	9.45475	9.37854	8.82628	9.08683
URIAAL_R01818	8.65661	8.32279	8.73803	7.82244	8.23303	8.25633
URIAAL_R11814	8.92519	8.51834	8.5731	9.66423	7.3269	8.49411
URIAAL_R11727	12.8052	11.9203	11.4837	14.9798	12.2317	11.7898
URIAAL_R01807	5.26152	4.33045	5.20759	5.85003	5.09334	5.26101
URIAAL_R01829	4.99443	4.33045	4.33045	5.67919	4.7743	4.33045
URIAAL_R11815	4.33045	4.33045	4.62683	4.91391	4.33045	4.33045
URIAAL_R11728	7.65008	8.22472	7.69343	6.71878	6.46665	7.66438
URIAAL_R11729	12.0647	12.0724	12.0626	12.1414	12.2546	11.9985
URIAAL_R01728	5.31595	5.84434	5.1588	5.64151	5.25958	5.26101
URIAAL_R01825	5.20321	4.33045	5.05022	4.33045	5.20807	5.26101
URIAAL_R01824	6.29368	6.14818	6.15362	6.05277	5.96709	5.9394
URIAAL_R11816	11.6121	11.6417	11.4876	11.9576	12.2114	11.8274
URIAAL_R01729	11.2626	11.0648	10.987	11.1324	11.4268	11.0483
URIAAL_R01815	4.33045	4.33045	4.33045	4.33045	4.33045	4.33045
URIAAL_R01730	9.46897	9.6351	10.159	9.42365	9.33779	10.3754
URIAAL_R11817	4.33045	4.33045	4.33045	5.42861	4.33045	4.33045
URIAAL_R11829	9.78861	10.7552	10.3642	8.28237	9.64519	10.0292
URIAAL_R11818	9.92687	9.79775	9.74442	9.94711	10.1495	10.0635
URIAAL_R01803	4.33045	4.33045	4.33045	4.33045	4.33045	4.33045
URIAAL_R01741	4.33045	4.33045	4.33045	4.33045	4.33045	4.33045
URIAAL_R01804	10.7165	10.5338	10.7384	10.1372	10.8169	10.272
URIAAL_R01814	5.31595	5.59753	5.61535	4.33045	5.6567	5.6554
URIAAL_R01823	5.50531	5.26918	4.33045	4.80791	4.33045	4.75236
URIAAL_R09616	6.98921	6.99428	6.19059	6.29352	6.39888	7.13403
URIAAL_R07932	8.8042	8.65522	8.70594	9.16297	8.63361	8.73376
URIAAL_R09602	7.7041	7.74687	6.31198	8.21348	8.16196	7.74305
URIAAL_R07933	5.54724	6.09839	5.3778	4.33045	5.86389	6.12881
URIAAL_R09601	7.01424	7.069	7.16926	8.15813	8.61956	7.04005
URIAAL_R07954	4.33045	4.80598	4.33045	4.33045	4.33045	4.33045
URIAAL_R07923	4.33045	4.80598	4.74887	5.71557	4.7743	4.33045
URIAAL_R09617	7.5857	6.91525	5.58474	7.31182	7.20809	7.67059
URIAAL_R07934	4.33045	4.33045	4.33045	5.27289	4.64492	4.92503
URIAAL_R09600	4.33045	4.33045	4.33045	4.91391	4.33045	4.33045
URIAAL_R07922	10.9847	11.2196	11.7592	11.6549	11.209	11.0442
URIAAL_R07921	6.11008	6.14818	6.07615	6.13006	5.51706	5.89283
URIAAL_R09633	8.49645	8.75825	8.78067	7.40125	8.23303	8.66751
URIAAL_R07920	11.7678	11.3032	11.8169	11.4268	11.7116	11.365
URIAAL_R07953	6.79986	6.4881	7.11599	6.20276	5.89057	6.60892
URIAAL_R09599	4.33045	4.33045	4.33045	4.33045	4.33045	4.33045
URIAAL_R09618	12.089	11.9062	11.7852	13.3726	12.2486	12.0639
URIAAL_R09598	10.2611	9.95836	10.0565	10.2744	9.58513	10.2649
URIAAL_R07935	8.61722	8.30269	9.1362	8.02205	7.48418	9.07991
URIAAL_R09619	8.355	7.8197	7.99479	8.48018	9.07539	9.27029
URIAAL_R09620	7.28379	6.94211	6.91143	7.32205	7.86013	7.63292
URIAAL_R07936	4.33045	4.33045	4.33045	4.33045	4.33045	4.33045
URIAAL_R07952	5.62616	5.87547	5.25352	5.15015	5.51706	5.05614
URIAAL_R09596	4.802	4.33045	4.74887	4.33045	4.7743	4.33045
URIAAL_R09595	7.05095	7.069	6.81343	7.71104	7.18887	7.41301
URIAAL_R07924	4.33045	4.33045	4.33045	4.33045	4.33045	4.33045
URIAAL_R09621	4.33045	4.33045	4.33045	4.33045	4.33045	4.33045
URIAAL_R09603	4.99443	4.33045	4.33045	5.00267	4.7743	4.33045
URIAAL_R07931	6.33566	5.96409	5.92723	5.37969	5.43905	5.38622
URIAAL_R07937	4.90672	5.26918	4.62683	4.33045	4.33045	4.33045
URIAAL_R07938	4.33045	4.99998	4.33045	4.33045	4.33045	4.33045
URIAAL_R09604	4.33045	4.33045	4.33045	4.33045	4.33045	4.33045
URIAAL_R09605	4.33045	4.33045	4.33045	5.37969	4.95573	4.33045
URIAAL_R07955	10.7405	10.6951	10.6239	11.0696	12.1086	10.9887
URIAAL_R07939	10.3174	10.346	10.0048	9.09997	10.4677	10.1061
URIAAL_R09622	12.314	12.239	12.6935	11.1502	12.6591	12.0723
URIAAL_R07940	4.33045	4.80598	4.74887	4.33045	5.35389	4.33045
URIAAL_R07941	4.802	4.99998	4.98862	4.80791	4.33045	4.33045
URIAAL_R09612	4.802	4.80598	4.33045	4.33045	4.33045	4.33045
URIAAL_R09613	4.33045	4.33045	4.33045	5.00267	4.33045	4.33045
URIAAL_R07942	7.07489	7.81258	8.07493	6.31522	6.89938	6.68684
URIAAL_R09606	11.3491	11.7753	12.1236	10.9302	10.9418	11.5755
URIAAL_R07943	12.451	13.0331	12.8188	11.2842	11.9584	12.5058
URIAAL_R09607	5.31595	5.55702	5.55318	5.27289	5.09334	5.7673
URIAAL_R09623	5.92298	5.07737	5.20759	5.32794	5.09334	5.89283
URIAAL_R07944	4.33045	5.14689	4.33045	4.33045	4.33045	4.33045
URIAAL_R09608	4.33045	4.33045	4.33045	4.33045	4.33045	4.33045
URIAAL_R07925	4.33045	4.33045	4.33045	5.15015	4.33045	4.33045
URIAAL_R07945	4.33045	4.33045	4.33045	4.33045	4.33045	4.33045
URIAAL_R07926	4.33045	5.14689	5.05022	4.33045	4.33045	4.33045
URIAAL_R09624	4.802	4.33045	4.33045	4.80791	4.33045	4.33045
URIAAL_R07927	11.6723	11.9293	11.8271	9.76174	10.632	11.7185
URIAAL_R09625	7.05095	6.77242	6.34462	6.31522	5.6567	5.89283
URIAAL_R07928	6.22796	6.04647	6.29534	6.22607	5.62354	5.89283
URIAAL_R09628	5.14018	4.33045	4.33045	4.33045	4.33045	4.33045
URIAAL_R09627	4.33045	4.99998	4.33045	4.33045	4.33045	4.33045
URIAAL_R09626	4.33045	4.33045	4.33045	5.08036	4.33045	4.62931
URIAAL_R07946	11.4347	11.6342	12.0385	10.7075	11.129	11.855
URIAAL_R09629	6.97652	6.80222	7.36404	6.88231	7.20809	7.01056
URIAAL_R09630	8.88929	9.17144	9.77983	8.63791	7.5604	8.4589
URIAAL_R09631	11.8708	11.7911	12.0215	10.8818	11.5589	11.7936
URIAAL_R09615	4.33045	4.33045	4.33045	4.33045	4.33045	4.33045
URIAAL_R14876	5.95159	6.77242	6.71994	5.85003	6.21183	5.7404
URIAAL_R07947	9.86108	10.1329	10.2993	8.39189	9.54117	9.93778
URIAAL_R09614	9.81839	9.67069	9.2618	9.61799	9.91427	9.80008
URIAAL_R09611	6.87055	6.01964	5.52058	5.15015	6.14982	6.52613
URIAAL_R07929	4.33045	5.14689	4.33045	5.56176	4.95573	4.33045
URIAAL_R09609	6.39616	6.43087	5.67397	6.24896	5.43905	6.30966
URIAAL_R09634	4.33045	4.33045	4.33045	4.33045	4.33045	4.33045
URIAAL_R09635	4.33045	4.33045	4.33045	4.33045	4.33045	4.33045
URIAAL_R07930	11.2854	11.2122	11.5414	10.8342	11.4278	11.0908
URIAAL_R07948	5.76806	6.14818	6.53873	5.75076	6.29	6.14813
URIAAL_R09632	11.3646	11.8629	12.0318	11.5383	11.5621	11.7296
URIAAL_R07949	7.82035	8.41924	7.6069	8.78367	7.30036	8.10489
URIAAL_R07950	4.802	5.14689	4.33045	5.88125	4.7743	4.33045
URIAAL_R09610	5.14018	5.81233	4.62683	4.80791	5.58928	5.38622
URIAAL_R07951	5.46148	5.51478	5.4519	5.60241	5.72003	5.53004
URIAAL_R07840	5.92298	5.96409	5.55318	5.00267	5.55383	5.7404
URIAAL_R03587	12.0236	11.7183	12.0643	11.257	11.5469	11.5828
URIAAL_R07873	12.3596	12.4258	12.8719	11.6692	12.0526	12.1533
URIAAL_R07872	4.802	4.33045	4.33045	4.33045	5.30804	4.33045
URIAAL_R03553	4.33045	5.14689	4.33045	4.33045	4.95573	4.75236
URIAAL_R03559	11.719	12.2567	12.1694	11.3254	11.3062	11.7908
URIAAL_R07871	6.89782	5.55702	6.40751	6.07908	7.10925	6.04831
URIAAL_R07876	10.2827	9.58415	9.23754	9.46513	9.57063	9.86991
URIAAL_R03564	4.33045	4.33045	4.33045	4.33045	4.64492	4.33045
URIAAL_R07870	6.29368	6.04647	5.83272	5.32794	5.09334	5.62547
URIAAL_R03586	4.33045	4.33045	4.33045	4.33045	4.33045	4.33045
URIAAL_R03585	6.35615	6.39127	6.09598	7.54739	6.88739	6.35921
URIAAL_R03584	10.8463	11.0566	11.1673	9.84786	10.1385	10.7562
URIAAL_R07839	4.33045	4.33045	4.33045	4.80791	4.33045	4.33045
URIAAL_R07838	4.802	4.80598	4.92014	5.47508	4.33045	4.33045
URIAAL_R07869	9.29295	9.4008	9.08499	9.16577	9.03895	9.91465
URIAAL_R03583	10.2158	9.54206	9.59815	10.1793	10.3195	9.95678
URIAAL_R07868	5.26152	5.55702	5.20759	4.33045	5.55383	5.16556
URIAAL_R03588	9.6745	10.0721	10.2211	8.58025	9.45299	9.80288
URIAAL_R03582	5.54724	5.21042	5.05022	5.56176	5.86389	5.79356
URIAAL_R07837	6.49107	6.67885	6.43784	7.29115	7.10925	6.48269
URIAAL_R07836	4.33045	4.33045	4.33045	4.33045	4.7743	4.33045
URIAAL_R07867	4.33045	4.33045	4.33045	5.21391	4.64492	4.33045
URIAAL_R07877	8.17646	8.57383	7.85744	8.41094	8.08204	8.47662
URIAAL_R03593	11.3237	11.4639	11.2	11.0569	9.86165	11.5557
URIAAL_R07866	9.23436	8.83357	9.07132	9.25783	8.62309	8.98427
URIAAL_R07865	4.99443	5.14689	4.92014	7.52112	5.39747	5.49607
URIAAL_R07864	13.1588	13.2047	12.4331	13.875	12.5566	12.8694
URIAAL_R07863	5.73431	5.37559	5.61535	4.80791	4.7743	5.98418
URIAAL_R03581	10.4328	9.95034	9.44596	9.61185	9.83308	10.8219
URIAAL_R03580	8.355	7.35299	7.66313	8.5376	8.77969	7.54768
URIAAL_R07862	4.33045	5.55702	4.33045	4.33045	4.7743	4.62931
URIAAL_R07861	8.42518	9.53349	9.30135	8.70495	8.91228	9.29041
URIAAL_R03579	4.33045	4.33045	4.33045	4.33045	4.33045	4.33045
URIAAL_R15189	4.33045	4.33045	4.33045	4.33045	4.33045	4.33045
URIAAL_R15188	4.33045	4.33045	4.33045	4.33045	4.7743	4.33045
URIAAL_R03578	4.33045	4.33045	4.33045	4.33045	4.33045	4.33045
URIAAL_R03577	4.33045	4.33045	4.33045	4.33045	4.33045	4.33045
URIAAL_R03590	10.2889	10.2035	10.3482	9.50102	10.0808	10.2111
URIAAL_R07874	8.75062	8.68265	8.64568	7.22723	8.6613	8.63636
URIAAL_R07835	8.36456	8.92495	8.4267	8.46204	7.3785	8.84417
URIAAL_R03576	5.26152	5.55702	4.98862	4.80791	5.15292	5.46087
URIAAL_R07860	8.96963	10.0392	10.1187	9.94711	9.07024	9.56106
URIAAL_R07859	4.33045	4.33045	4.33045	4.33045	4.33045	4.33045
URIAAL_R03558	4.33045	4.33045	4.33045	4.33045	4.33045	4.33045
URIAAL_R07858	13.0167	13.0906	13.2762	11.5512	12.4705	12.2961
URIAAL_R07857	5.54724	4.33045	5.25352	5.27289	4.7743	4.33045
URIAAL_R07856	14.4078	14.2929	14.3874	13.2173	14.3573	14.0359
URIAAL_R03562	4.33045	4.33045	4.33045	4.33045	4.33045	4.33045
URIAAL_R03575	4.33045	4.33045	4.33045	4.91391	4.33045	4.33045
URIAAL_R03574	4.33045	4.33045	4.33045	4.33045	4.33045	4.33045
URIAAL_R07855	4.33045	4.33045	4.33045	4.91391	4.33045	4.33045
URIAAL_R15190	4.802	4.33045	5.25352	4.80791	5.02819	5.38622
URIAAL_R03557	6.25025	6.61263	6.94258	5.81791	5.43905	6.64845
URIAAL_R03563	8.90572	9.25724	9.16006	7.9715	8.67155	8.91333
URIAAL_R03573	5.97952	6.81687	6.1155	8.99998	5.68884	6.37531
URIAAL_R07875	5.76806	5.59753	5.78232	6.10484	6.69352	5.59465
URIAAL_R07854	9.17599	7.74687	6.87954	10.1807	7.74773	8.03472
URIAAL_R03572	8.13791	7.10489	6.24406	7.14874	6.91126	7.34442
URIAAL_R03571	6.41571	5.87547	5.29699	6.49558	5.75035	6.34291
URIAAL_R07853	5.36713	5.26918	5.10659	4.80791	5.15292	4.62931
URIAAL_R03570	11.4256	10.7943	10.4254	10.72	11.1668	11.1673
URIAAL_R03591	4.99443	4.33045	4.33045	4.33045	4.33045	4.33045
URIAAL_R03589	4.33045	4.33045	4.33045	4.33045	4.33045	4.33045
URIAAL_R07852	4.33045	4.33045	4.33045	4.33045	4.33045	4.62931
URIAAL_R03569	5.31595	5.6365	5.4156	5.85003	5.39747	4.84627
URIAAL_R07841	4.66463	4.33045	4.33045	4.33045	4.33045	4.33045
URIAAL_R07851	4.33045	4.33045	4.33045	5.00267	4.33045	4.33045
URIAAL_R07850	7.01424	7.05682	7.27005	6.47674	6.65115	7.36766
URIAAL_R07834	9.896	9.53778	8.88596	10.6548	10.5439	10.1672
URIAAL_R03556	4.33045	4.33045	4.62683	4.80791	4.873	5.34646
URIAAL_R03560	6.39616	6.88786	5.67397	6.35754	5.96709	6.54029
URIAAL_R07833	12.6188	12.7647	12.5139	11.2778	12.2375	12.4391
URIAAL_R07843	5.36713	5.6365	4.33045	4.33045	4.95573	4.84627
URIAAL_R07849	5.62616	6.45023	6.64528	4.33045	6.12843	6.62223
URIAAL_R03568	4.33045	4.33045	4.84202	4.33045	5.09334	4.99405
URIAAL_R03567	4.33045	4.33045	4.62683	4.33045	4.33045	4.33045
URIAAL_R03555	4.33045	4.33045	4.33045	5.08036	4.33045	4.33045
URIAAL_R03561	4.33045	4.33045	4.33045	4.33045	4.95573	4.33045
URIAAL_R07832	4.33045	4.33045	4.33045	5.00267	4.33045	4.33045
URIAAL_R07831	4.33045	4.33045	4.33045	5.08036	4.33045	4.33045
URIAAL_R07848	4.33045	4.33045	4.33045	4.33045	4.33045	4.33045
URIAAL_R07842	4.33045	4.33045	4.33045	4.33045	4.33045	4.33045
URIAAL_R14972	4.33045	4.33045	4.33045	4.33045	4.7743	4.33045
URIAAL_R07847	4.33045	4.33045	4.33045	5.15015	4.33045	4.33045
URIAAL_R03566	5.31595	4.99998	5.25352	5.91165	5.20807	4.92503
URIAAL_R07846	10.2184	9.86586	10.4806	9.80903	10.0576	10.3089
URIAAL_R07845	5.14018	5.9353	5.05022	5.71557	4.33045	4.99405
URIAAL_R03554	6.31485	5.51478	6.45274	4.91391	5.6567	5.68449
URIAAL_R03592	6.11008	6.17234	6.68313	5.56176	6.19151	5.79356
URIAAL_R03565	7.00178	8.03044	8.05648	8.70495	8.73806	8.40071
URIAAL_R07844	13.9205	14.0955	13.9974	13.0207	14.4848	13.3092
URIAAL_R06421	4.802	4.33045	4.33045	5.47508	4.64492	4.33045
URIAAL_R15107	6.20527	6.371	6.09598	7.6955	6.54669	6.10918
URIAAL_R14657	5.89364	6.41122	4.84202	6.13006	6.3456	6.10918
URIAAL_R06419	7.8616	8.50082	8.28356	10.0246	8.88321	8.51139
URIAAL_R06383	8.355	8.07858	8.21873	9.44914	8.09228	7.83975
URIAAL_R02074	9.56716	9.28559	9.23141	10.3228	9.55413	9.50018
URIAAL_R02128	9.46675	9.39608	9.27179	10.319	9.81474	9.4793
URIAAL_R02126	8.4568	8.40046	8.66098	8.769	8.41508	8.2189
URIAAL_R02125	6.25025	5.42433	5.88095	6.88231	6.39888	7.37532
URIAAL_R15391	4.33045	4.33045	4.92014	5.94126	4.95573	4.92503
URIAAL_R06384	7.99723	8.40518	8.18517	9.07636	8.18605	8.07257
URIAAL_R14863	4.802	5.21042	4.92014	5.97014	5.35389	4.92503
URIAAL_R14656	11.9038	12.0857	11.6737	12.2602	12.9764	11.5869
URIAAL_R15105	10.5647	10.004	9.27775	10.7342	10.6109	10.2247
URIAAL_R14862	9.20281	10.3325	10.0726	11.38	10.5614	10.7497
URIAAL_R02122	6.88425	7.37262	6.74393	7.70329	7.59701	7.53409
URIAAL_R02124	7.00178	6.84572	6.98305	8.17496	7.90154	7.58766
URIAAL_R15387	5.89364	6.26452	6.20867	7.85073	6.85077	6.67416
URIAAL_R15389	7.21044	6.98142	7.24553	9.14606	8.08717	7.93544
URIAAL_R15390	7.24235	7.9091	7.43781	9.78011	8.56195	8.36691
URIAAL_R06379	10.0397	10.5252	9.51988	11.9503	10.8718	10.4034
URIAAL_R14864	5.0712	5.32403	4.33045	5.94126	4.33045	4.75236
URIAAL_R02082	8.35019	8.46514	8.03778	8.72789	9.3335	7.80637
URIAAL_R15106	4.66463	4.99998	4.98862	5.15015	4.64492	4.62931
URIAAL_R02121	7.09842	8.03044	7.17795	8.40145	7.25499	7.60074
URIAAL_R06380	5.83261	5.59753	6.03547	7.63158	5.83657	6.18588
URIAAL_R06382	5.97952	6.09839	6.34462	6.86823	6.88739	6.40691
URIAAL_R15393	4.33045	4.33045	4.62683	5.08036	4.7743	4.62931
URIAAL_R02120	7.11004	7.23983	7.43781	8.1916	8.51338	7.86158
URIAAL_R02119	10.1919	10.2395	10.2324	11.0681	10.5949	10.3564
URIAAL_R06381	8.8042	8.65917	9.23754	9.54681	9.18425	9.00391
URIAAL_R02118	6.64629	5.37559	4.92014	6.22607	5.09334	7.19622
URIAAL_R02117	4.99443	5.26918	4.74887	5.47508	4.33045	4.33045
URIAAL_R15388	4.802	4.33045	4.33045	4.33045	4.33045	4.33045
URIAAL_R06378	6.0068	6.84572	6.0146	7.20525	6.69352	6.89666
URIAAL_R02116	5.89364	6.01964	6.17224	5.81791	5.47885	5.11295
URIAAL_R06361	6.18215	6.30819	6.48204	7.23809	7.18887	6.97023
URIAAL_R06362	7.90826	6.74195	6.37645	7.21628	7.39528	8.36691
URIAAL_R06363	6.49107	6.04647	5.48686	7.51225	5.77984	6.35921
URIAAL_R02066	9.35882	9.69394	10.1751	8.39668	9.09834	9.42936
URIAAL_R06375	11.1307	10.8358	11.5916	9.52519	10.4361	10.9807
URIAAL_R06416	6.69424	6.24211	5.64508	5.91165	6.25152	5.7404
URIAAL_R06415	6.05955	6.64615	5.64508	6.8251	6.53107	6.71183
URIAAL_R02065	6.43496	6.21928	5.8078	7.60684	6.73459	6.04831
URIAAL_R06360	7.30406	8.54848	7.57467	12.0349	8.67155	6.55431
URIAAL_R02115	7.94068	8.31278	7.08856	7.97791	9.18186	8.17612
URIAAL_R02064	5.62616	7.38233	6.85786	5.37969	7.09897	6.91809
URIAAL_R06414	5.36713	4.33045	4.33045	5.67919	4.33045	4.92503
URIAAL_R02114	4.33045	4.66746	4.33045	5.64151	4.33045	4.33045
URIAAL_R02083	4.802	4.80598	4.33045	5.64151	5.15292	4.33045
URIAAL_R02063	7.93426	8.71716	8.12449	7.57318	8.57657	8.60451
URIAAL_R02062	9.93489	10.1817	9.77563	8.8755	9.66067	9.9224
URIAAL_R06359	10.0005	10.5498	10.0726	8.55053	8.99615	9.8885
URIAAL_R14867	4.66463	4.80598	5.1588	4.33045	5.39747	5.56286
URIAAL_R06413	6.27215	6.57823	6.85786	6.37819	6.59247	6.12881
URIAAL_R02061	10.2964	9.60679	10.2436	10.3501	10.1286	9.953
URIAAL_R02113	4.33045	4.33045	4.33045	4.33045	4.33045	4.33045
URIAAL_R06412	4.33045	4.33045	4.33045	5.15015	4.33045	4.33045
URIAAL_R06376	8.36456	9.18245	9.49963	8.21348	8.65787	9.39261
URIAAL_R06358	4.33045	6.28655	4.33045	4.33045	4.33045	4.33045
URIAAL_R02060	7.30406	6.26452	6.27848	6.58593	7.24573	6.40691
URIAAL_R06377	4.33045	4.33045	4.33045	4.33045	4.33045	4.33045
URIAAL_R02112	5.76806	5.96409	5.75623	5.47508	5.77984	5.46087
URIAAL_R06357	8.03971	7.58055	7.24553	8.51138	9.05468	8.02026
URIAAL_R02111	9.61984	9.72249	9.13401	9.5575	10.358	9.93778
URIAAL_R02059	5.89364	4.91156	5.4519	5.27289	4.64492	5.86882
URIAAL_R02110	6.20527	5.71031	5.3778	6.27143	6.01545	6.30966
URIAAL_R06411	4.99443	4.33045	4.33045	4.33045	5.39747	4.84627
URIAAL_R02081	4.33045	4.33045	4.33045	5.27289	4.33045	4.33045
URIAAL_R02109	4.33045	4.33045	4.33045	5.47508	4.33045	4.33045
URIAAL_R06410	6.93774	6.26452	6.07615	7.31182	7.14963	6.6354
URIAAL_R06418	5.41552	5.26918	4.98862	5.00267	5.72003	5.21473
URIAAL_R02108	4.66463	4.66746	4.74887	5.00267	4.64492	4.75236
URIAAL_R06409	4.33045	4.33045	4.33045	4.33045	4.33045	4.33045
URIAAL_R02123	4.33045	4.33045	4.92014	5.56176	4.33045	4.33045
URIAAL_R02107	4.33045	4.33045	4.33045	4.33045	4.64492	4.33045
URIAAL_R06372	4.99443	5.42433	4.74887	4.33045	4.33045	4.62931
URIAAL_R02086	4.33045	4.33045	4.33045	5.47508	4.33045	4.33045
URIAAL_R02058	4.33045	4.33045	4.33045	5.21391	4.873	4.33045
URIAAL_R02057	4.33045	4.33045	4.33045	5.47508	4.95573	4.33045
URIAAL_R02106	9.93329	9.76885	8.95706	10.15	9.71608	9.95552
URIAAL_R06356	4.33045	4.33045	5.25352	4.66883	4.873	6.14813
URIAAL_R06422	4.33045	4.33045	4.74887	4.33045	4.7743	5.16556
URIAAL_R02105	4.33045	4.33045	4.92014	4.33045	4.7743	5.84429
URIAAL_R06355	11.5398	11.4605	11.7302	11.1374	11.4586	11.4542
URIAAL_R06408	4.33045	5.26918	4.33045	4.33045	4.33045	4.33045
URIAAL_R06407	4.33045	4.33045	4.33045	4.33045	4.64492	4.33045
URIAAL_R06354	4.33045	4.80598	4.33045	4.33045	4.33045	4.62931
URIAAL_R02104	13.8442	13.6083	13.644	13.6218	14.4236	13.669
URIAAL_R02056	4.90672	5.6365	4.92014	5.99833	4.33045	4.33045
URIAAL_R02103	9.2134	6.92875	7.22894	11.5001	9.34206	9.90555
URIAAL_R02102	5.36713	5.81233	6.69551	6.02586	6.14982	6.32639
URIAAL_R02101	10.2496	10.1273	10.3864	9.72048	9.74704	10.3469
URIAAL_R06406	6.05955	6.39127	6.64528	5.37969	5.75035	6.93918
URIAAL_R06405	6.39616	6.88786	7.56813	7.38186	6.86309	7.5409
URIAAL_R06404	8.26085	8.22472	8.10667	7.50333	8.96596	8.63636
URIAAL_R02080	4.33045	4.66746	4.74887	4.33045	5.25958	4.62931
URIAAL_R06364	8.33568	8.44695	7.87864	7.52112	6.96918	7.52725
URIAAL_R02067	5.76806	6.21928	5.55318	6.24896	5.83657	4.84627
URIAAL_R06403	4.33045	5.07737	4.33045	5.15015	4.7743	4.33045
URIAAL_R06402	6.56232	7.55511	7.58765	6.05277	6.65115	6.69939
URIAAL_R02100	15.2894	15.1133	14.5722	15.0994	14.7436	15.1108
URIAAL_R06401	8.77587	8.85093	8.8139	9.95036	9.06507	9.45633
URIAAL_R06370	6.77052	7.00702	7.25375	6.15477	6.73459	7.01056
URIAAL_R02076	6.31485	6.59554	7.35644	5.99833	5.89057	6.59548
URIAAL_R06400	4.33045	4.33045	4.33045	4.33045	4.33045	4.33045
URIAAL_R02099	4.33045	5.14689	4.33045	5.56176	4.33045	4.99405
URIAAL_R06399	5.58747	5.14689	5.72951	5.56176	5.89057	6.10918
URIAAL_R02127	8.28623	8.31278	8.13332	8.82324	8.82628	8.39327
URIAAL_R02098	7.09842	5.74539	6.36064	6.24896	7.80504	8.25633
URIAAL_R06369	12.3656	12.4227	12.7132	11.6825	12.3121	12.0465
URIAAL_R02097	6.37631	6.01964	6.42276	6.15477	6.43321	5.7404
URIAAL_R06374	6.89782	7.19629	6.89025	6.20276	5.91664	5.7404
URIAAL_R02096	7.05095	7.53789	7.65699	6.88231	7.08861	7.24739
URIAAL_R02095	11.401	11.1294	11.3512	11.5421	11.5821	11.3913
URIAAL_R02094	10.5984	10.574	10.6623	9.62817	10.1336	9.96306
URIAAL_R06368	9.82358	10.2604	10.2727	9.22869	10.2688	9.9965
URIAAL_R02078	11.5623	11.6679	11.8446	11.9993	11.583	11.5373
URIAAL_R06386	11.5085	11.9288	11.7265	10.6498	10.8014	11.2857
URIAAL_R02069	6.52718	6.07271	5.88095	6.24896	5.25958	5.81922
URIAAL_R06387	7.05095	9.35533	8.26361	10.5623	9.04422	8.5045
URIAAL_R14866	11.405	11.037	11.7134	10.6256	11.3615	11.077
URIAAL_R02085	12.0626	12.1392	12.4461	11.2285	12.2953	11.6505
URIAAL_R06388	6.13458	7.67797	7.12501	8.64997	7.73467	6.72416
URIAAL_R06417	6.33566	6.67885	6.82468	7.3322	7.08861	6.79582
URIAAL_R02087	4.99443	4.80598	4.33045	4.33045	4.33045	4.75236
URIAAL_R02084	6.20527	6.21928	5.05022	6.29352	5.62354	7.62013
URIAAL_R02088	4.33045	4.33045	4.33045	4.33045	4.33045	4.33045
URIAAL_R06365	4.33045	4.80598	4.33045	4.33045	4.33045	4.33045
URIAAL_R06420	4.33045	4.33045	4.33045	4.33045	4.33045	4.33045
URIAAL_R06389	4.33045	4.33045	4.33045	4.33045	4.33045	4.33045
URIAAL_R15392	4.33045	4.33045	4.33045	4.33045	4.33045	4.33045
URIAAL_R15689	4.33045	4.33045	4.33045	4.33045	4.33045	4.33045
URIAAL_R06390	4.33045	4.33045	4.33045	4.33045	4.33045	4.33045
URIAAL_R06366	9.05458	5.47063	7.34881	5.27289	7.07817	5.05614
URIAAL_R06385	4.33045	4.33045	4.33045	4.33045	4.33045	4.62931
URIAAL_R06391	4.33045	4.33045	4.92014	4.33045	4.33045	4.33045
URIAAL_R06367	8.5849	9.40316	9.19408	8.71264	9.19375	9.20606
URIAAL_R02068	6.22796	6.61263	7.41608	6.22607	7.25499	8.12303
URIAAL_R06392	5.26152	4.80598	4.33045	5.00267	4.95573	4.92503
URIAAL_R06373	8.68737	8.54422	7.7693	8.49363	8.63361	9.03766
URIAAL_R06393	4.33045	4.33045	4.33045	4.33045	4.33045	4.75236
URIAAL_R02079	4.33045	4.33045	4.33045	5.27289	4.33045	4.33045
URIAAL_R06394	9.7564	9.14917	8.78067	9.2992	10.5327	9.06596
URIAAL_R02089	12.3914	12.1463	11.9481	12.2171	13.0747	11.4479
URIAAL_R02090	13.1669	13.491	13.598	11.7815	12.5026	12.9157
URIAAL_R06395	8.48335	8.61103	8.48981	8.93581	9.11593	9.07991
URIAAL_R02070	7.83424	7.6301	7.06058	8.85482	7.93041	7.39806
URIAAL_R02077	4.90672	4.33045	5.72951	6.02586	4.33045	4.75236
URIAAL_R02071	6.70984	6.14818	7.40141	5.71557	6.48306	6.60892
URIAAL_R02091	11.2447	11.4169	11.659	10.4418	11.3699	11.04
URIAAL_R06396	5.73431	5.77936	5.88095	5.42861	5.09334	5.49607
URIAAL_R14865	4.802	4.99998	4.84202	6.75002	5.09334	5.49607
URIAAL_R06397	7.60207	7.86854	7.6069	7.17162	7.66752	7.23899
URIAAL_R02092	9.34203	10.0543	9.47737	9.74874	9.97884	9.44381
URIAAL_R02073	11.3053	11.0103	11.1145	11.1628	11.6344	11.2253
URIAAL_R02075	11.87	12.1086	12.1514	11.5199	11.795	11.4613
URIAAL_R06398	4.33045	4.33045	4.33045	4.33045	4.7743	4.33045
URIAAL_R02093	4.802	4.80598	4.33045	4.33045	4.64492	4.33045
URIAAL_R02072	7.84113	7.42051	6.91143	7.14874	7.93041	7.95585
URIAAL_R06371	5.66346	5.81233	6.24406	5.00267	5.30804	5.38622
URIAAL_R08358	7.03882	6.56069	6.79066	7.21628	6.65115	7.41301
URIAAL_R02947	5.66346	5.47063	6.20867	7.30153	5.75035	6.06894
URIAAL_R08356	9.07795	9.17144	9.82392	8.66193	9.15293	8.82497
URIAAL_R08357	4.99443	4.33045	4.33045	4.66883	4.33045	4.33045
URIAAL_R02946	9.3988	9.42417	10.1009	10.9409	8.96596	10.1441
URIAAL_R15492	4.802	5.07737	4.74887	6.70288	4.33045	4.62931
URIAAL_R08355	7.34374	7.76912	6.70778	9.16856	7.34431	7.3048
URIAAL_R08354	4.33045	5.37559	4.33045	6.31522	5.30804	5.4243
URIAAL_R02945	5.73431	5.55702	4.98862	6.47674	4.95573	5.16556
URIAAL_R15218	4.66463	4.33045	4.74887	5.27289	4.33045	4.33045
URIAAL_R08359	4.33045	4.33045	4.33045	4.33045	4.33045	4.33045
URIAAL_R08360	4.33045	4.33045	4.33045	4.33045	4.33045	4.33045
URIAAL_R03451	4.802	4.33045	6.0146	7.76412	5.09334	4.33045
URIAAL_R03409	4.33045	4.80598	4.74887	5.42861	4.33045	4.33045
URIAAL_R00429	4.33045	4.80598	4.74887	4.33045	5.20807	4.33045
URIAAL_R03450	5.26152	5.26918	4.74887	6.92369	5.20807	5.11295
URIAAL_R03449	4.33045	5.26918	4.62683	6.41852	4.33045	4.99405
URIAAL_R00383	5.20321	4.66746	4.92014	5.32794	4.95573	5.11295
URIAAL_R00428	7.15556	7.58893	7.95046	7.32205	7.51517	7.65814
URIAAL_R03420	10.418	10.2899	10.1504	10.0791	10.5006	10.5212
URIAAL_R00427	9.79743	9.95516	9.43711	9.32196	10.0301	9.96556
URIAAL_R00426	4.33045	4.33045	4.74887	6.02586	5.20807	5.38622
URIAAL_R03408	10.8972	10.281	9.8428	12.5926	12.2734	9.65714
URIAAL_R00425	4.33045	4.33045	4.33045	4.80791	4.33045	4.33045
URIAAL_R03414	9.06923	8.11366	8.29539	10.7445	10.077	9.52076
URIAAL_R00382	8.96022	8.75825	8.47948	10.6287	10.4068	8.43374
URIAAL_R03448	4.33045	4.33045	4.33045	5.27289	4.33045	4.33045
URIAAL_R03457	8.63311	8.94449	8.50686	10.1272	9.46676	8.54535
URIAAL_R00424	12.6265	12.5923	12.6859	12.2188	12.8452	12.3314
URIAAL_R03447	8.77229	8.90514	9.10748	9.23136	8.64058	9.24163
URIAAL_R00435	7.21044	8.00574	7.65699	7.85772	7.2176	7.58107
URIAAL_R00423	10.1023	9.81199	10.1395	9.04325	10.0859	10.0087
URIAAL_R03407	12.9518	12.5269	12.5428	12.0922	12.6132	12.2442
URIAAL_R00381	7.79217	7.91576	7.80854	9.77096	8.63361	8.19338
URIAAL_R00380	10.1852	10.8077	11.0988	9.74501	10.6047	10.4506
URIAAL_R03446	9.18139	9.82608	9.88763	9.11453	11.1535	10.0099
URIAAL_R03411	9.68404	10.7799	10.5923	9.83562	12.1745	10.8741
URIAAL_R00379	9.02481	8.32279	8.36442	10.223	9.46087	9.48629
URIAAL_R00378	10.2105	10.1386	9.57253	10.5094	9.98841	10.123
URIAAL_R03406	12.6852	12.8628	13.3142	11.699	12.2435	12.8356
URIAAL_R00377	6.8143	6.85991	7.03202	6.13006	6.66542	6.24043
URIAAL_R15415	6.54487	6.59554	6.7675	7.68766	6.76129	6.40691
URIAAL_R00422	7.49209	8.01195	7.68139	7.32205	7.0028	6.71183
URIAAL_R03452	6.29368	6.80222	7.36404	7.52993	6.94631	7.05937
URIAAL_R03445	5.14018	4.80598	5.33833	5.91165	5.09334	5.21473
URIAAL_R00421	8.64491	8.27717	8.07951	8.07685	8.1075	8.90029
URIAAL_R00376	11.3853	11.1505	12.2737	11.0941	11.0697	11.3969
URIAAL_R00434	10.7433	11.2629	11.695	11.0226	11.2892	10.5763
URIAAL_R00420	12.9728	13.0661	13.6179	12.6474	12.6898	12.8407
URIAAL_R03444	10.0501	9.26761	9.56768	9.33942	8.08717	10.3295
URIAAL_R03405	7.02659	7.03214	6.73199	8.08875	7.43639	7.81199
URIAAL_R03443	4.33045	5.26918	4.33045	6.53247	5.02819	5.21473
URIAAL_R03463	8.39286	7.86854	8.30713	8.45288	8.29632	8.28479
URIAAL_R03461	8.02771	7.55511	7.84671	8.03441	7.90736	7.56781
URIAAL_R03442	6.50925	7.29241	6.37645	8.30801	7.3269	7.62654
URIAAL_R00387	9.16238	9.14073	9.30524	11.9981	9.75187	9.4366
URIAAL_R00375	8.17646	7.84083	7.50105	9.3493	8.89199	7.83975
URIAAL_R15413	6.37631	6.32947	6.7675	6.37819	6.45004	6.29271
URIAAL_R03412	8.47014	8.69425	9.24972	9.50986	8.50958	8.67366
URIAAL_R00395	8.99748	8.98279	9.29352	9.38815	9.50921	9.36631
URIAAL_R00419	4.33045	4.33045	4.33045	5.27289	4.7743	4.92503
URIAAL_R00374	8.86261	8.14789	8.57633	8.35795	8.68172	7.67677
URIAAL_R00418	5.50531	5.71031	5.33833	4.33045	5.35389	5.46087
URIAAL_R00417	11.1398	11.1237	11.5578	10.7923	11.1931	11.077
URIAAL_R00416	8.20869	7.94855	8.89634	8.02205	8.6266	9.11419
URIAAL_R03441	8.67591	8.45152	9.93111	8.5376	9.47067	9.43118
URIAAL_R00373	8.56433	8.96377	9.57898	10.8227	10.4687	9.53432
URIAAL_R00415	5.20321	5.07737	5.25352	4.33045	4.33045	5.16556
URIAAL_R03440	4.90672	5.32403	5.05022	5.32794	5.20807	5.16556
URIAAL_R00414	13.3887	13.8376	14.0813	12.1572	12.7087	13.5551
URIAAL_R03413	4.66463	4.99998	5.05022	4.33045	4.64492	5.21473
URIAAL_R00372	11.3407	10.9767	11.0341	11.3686	11.6222	11.2892
URIAAL_R03404	12.2652	12.0267	12.0057	12.406	11.6396	11.8366
URIAAL_R03403	12.4019	12.2466	12.5786	12.2619	12.5253	12.254
URIAAL_R03439	4.33045	4.33045	4.33045	5.27289	5.30804	4.33045
URIAAL_R03402	4.66463	4.66746	4.74887	4.33045	4.7743	4.33045
URIAAL_R00431	8.76149	8.96057	10.2687	7.50333	7.28239	8.56534
URIAAL_R00413	12.1889	12.1463	12.8313	12.0486	12.1254	12.0046
URIAAL_R00412	11.737	11.7843	12.1888	11.4198	11.6156	11.8267
URIAAL_R03401	8.89259	8.94125	8.81663	10.1766	9.25628	9.04241
URIAAL_R00437	11.9751	11.8305	12.1558	11.0636	11.9049	11.636
URIAAL_R03438	7.6812	7.21823	7.30998	7.16022	7.82364	7.23899
URIAAL_R00411	10.7267	10.6728	10.6432	9.78921	10.6242	10.522
URIAAL_R03400	9.44446	9.32088	9.68738	9.23669	9.57971	9.45989
URIAAL_R00410	14.2624	14.06	14.6596	14.7173	14.6535	14.2335
URIAAL_R00371	13.2422	12.8238	13.855	12.7102	12.6759	12.8199
URIAAL_R00409	9.55888	9.39135	9.20037	8.61758	9.82699	9.21029
URIAAL_R00370	6.15859	5.87547	6.42276	5.91165	5.58928	5.91635
URIAAL_R00408	8.61722	8.7838	8.53372	9.89244	9.22187	9.06362
URIAAL_R00407	5.31595	5.07737	5.3778	6.55054	5.09334	5.53004
URIAAL_R03437	8.85586	8.30269	7.37911	8.67772	8.58021	7.8937
URIAAL_R03453	8.50511	8.00574	8.49665	8.61348	8.68847	8.87917
URIAAL_R03458	8.42061	8.15912	8.31877	9.24994	9.02305	8.93396
URIAAL_R00369	7.77066	6.57823	6.83583	6.95059	7.47633	8.19338
URIAAL_R00406	12.3332	12.3898	12.3746	11.4951	12.2793	12.0583
URIAAL_R03399	7.6812	6.98142	8.39039	7.56463	7.10925	7.94057
URIAAL_R00405	5.14018	4.33045	4.84202	5.37969	5.09334	4.92503
URIAAL_R00404	4.66463	5.26918	4.33045	5.15015	5.09334	4.33045
URIAAL_R14742	5.36713	5.14689	4.84202	5.21391	5.15292	5.68449
URIAAL_R00368	10.0501	10.281	10.4493	10.4567	10.0006	10.2951
URIAAL_R03436	4.99443	5.77936	6.27848	5.99833	4.7743	5.71281
URIAAL_R00385	8.29125	9.00467	9.41925	7.85772	7.44447	9.04004
URIAAL_R00367	11.0825	10.7497	11.0665	10.5559	10.8547	10.7555
URIAAL_R03398	11.2753	10.8401	10.6254	11.3261	10.9488	10.7926
URIAAL_R00366	5.8008	5.9353	5.99336	6.70288	5.99152	6.69939
URIAAL_R03435	5.66346	6.371	6.93228	6.93721	6.17084	6.56817
URIAAL_R03397	7.26323	7.91576	8.51362	8.10642	7.42827	7.98594
URIAAL_R00430	6.18215	6.67885	5.72951	6.179	5.39747	5.9394
URIAAL_R00432	5.20321	5.51478	5.33833	4.33045	5.25958	5.59465
URIAAL_R00365	7.02659	7.19629	7.24553	6.98998	6.29	6.99054
URIAAL_R00403	10.3441	10.3642	10.2436	9.68388	10.5958	10.0855
URIAAL_R03434	4.99443	4.33045	4.84202	4.33045	6.17084	5.71281
URIAAL_R14927	4.802	4.33045	4.74887	4.33045	4.33045	4.33045
URIAAL_R03459	5.14018	4.33045	4.84202	4.33045	4.64492	4.62931
URIAAL_R00364	7.16671	6.45023	6.05598	5.21391	5.86389	6.20433
URIAAL_R00436	8.56433	8.31779	8.77506	7.36221	8.84752	7.52038
URIAAL_R00402	9.46232	9.36261	9.23346	8.75419	9.51111	8.83871
URIAAL_R03460	7.37278	7.5292	7.41608	6.53247	6.95779	7.23054
URIAAL_R00363	9.0338	9.02316	8.89634	8.5928	8.49425	9.40742
URIAAL_R03433	8.94122	8.59461	8.87289	9.59327	8.88027	9.15648
URIAAL_R00401	6.43496	6.81687	7.22894	6.24896	6.38136	6.72416
URIAAL_R00362	9.82703	9.4653	10.1708	10.0968	10.0783	9.92755
URIAAL_R03432	7.17777	7.03214	7.37911	6.33656	6.3456	7.66438
URIAAL_R00400	8.97275	8.38144	8.21457	8.08281	8.11254	8.57194
URIAAL_R03431	12.1005	12.2476	12.7202	11.9962	12.725	12.1571
URIAAL_R00361	10.8067	10.9544	11.3884	10.2757	10.6329	11.0287
URIAAL_R03415	10.2599	10.0133	10.3928	9.35911	9.74057	9.82787
URIAAL_R00399	6.25025	6.28655	6.69551	5.85003	6.38136	6.34291
URIAAL_R00398	7.19963	6.95534	7.34113	6.45762	6.38136	7.04974
URIAAL_R03396	10.2662	9.91286	9.81985	9.92747	10.4716	9.7617
URIAAL_R00360	6.25025	5.74539	5.92723	6.55054	6.56213	6.56817
URIAAL_R15414	4.33045	4.33045	4.33045	5.15015	4.33045	5.05614
URIAAL_R03395	4.33045	4.80598	4.33045	4.33045	4.7743	5.4243
URIAAL_R00359	10.9894	10.9791	11.4268	9.74313	10.6502	11.0925
URIAAL_R00433	7.63425	8.08449	8.01405	9.58075	8.01902	8.57852
URIAAL_R00438	7.67348	8.21937	8.02359	9.58702	7.96429	8.41181
URIAAL_R03394	7.24235	7.20731	7.75215	8.57182	7.39528	7.78367
URIAAL_R03430	10.4238	9.05646	8.94961	9.12608	10.5336	10.2289
URIAAL_R00397	9.41495	9.16868	9.39935	8.34315	9.28322	9.22081
URIAAL_R00396	5.54724	6.41122	6.15362	5.27289	4.64492	6.12881
URIAAL_R03462	10.4598	10.499	11.5912	11.3329	11.0232	10.4911
URIAAL_R03410	5.73431	5.42433	5.33833	5.47508	5.6567	4.33045
URIAAL_R14715	4.33045	4.33045	4.74887	6.76538	5.09334	4.75236
URIAAL_R03429	5.14018	4.33045	5.05022	5.42861	5.20807	4.92503
URIAAL_R00394	11.1515	11.317	11.6475	10.5388	10.6511	11.2831
URIAAL_R00358	4.99443	5.26918	4.62683	5.37969	4.95573	4.75236
URIAAL_R03416	6.05955	7.069	6.09598	9.05235	6.87529	7.88308
URIAAL_R00389	4.33045	4.33045	4.92014	5.78484	4.64492	4.33045
URIAAL_R03455	4.33045	4.91156	5.48686	5.42861	5.09334	4.33045
URIAAL_R03454	10.8403	11.2249	12.0902	11.0326	10.7937	11.1904
URIAAL_R03456	8.2454	8.29763	9.08951	8.60525	8.48653	8.12303
URIAAL_R03393	6.27215	6.99428	5.72951	7.81528	6.88739	7.14309
URIAAL_R03428	11.3425	11.0202	10.8107	12.1424	11.6552	10.9258
URIAAL_R03427	9.47777	9.05047	9.83339	10.1958	9.78365	9.75012
URIAAL_R00357	6.84271	6.99428	7.48028	6.92369	6.72104	7.07842
URIAAL_R03392	9.55056	9.43571	9.64653	9.26307	9.1505	9.0281
URIAAL_R00356	15.4057	15.1813	14.9179	14.4255	14.3732	15.0645
URIAAL_R00388	4.33045	4.80598	4.98862	5.15015	5.6567	4.75236
URIAAL_R03418	4.802	4.66746	4.92014	4.33045	4.33045	4.33045
URIAAL_R00393	12.2069	11.9418	12.2806	12.6053	13.1239	12.377
URIAAL_R03391	9.3029	9.54845	9.52824	10.1344	9.62953	9.58406
URIAAL_R03390	9.52953	10.3941	10.2587	10.5366	9.56149	10.0611
URIAAL_R03426	4.33045	4.33045	4.33045	4.33045	4.873	4.62931
URIAAL_R03417	4.33045	4.33045	4.33045	4.80791	4.33045	4.62931
URIAAL_R14926	4.802	4.33045	4.33045	5.47508	5.30804	4.33045
URIAAL_R03425	4.33045	4.80598	4.33045	5.00267	4.33045	4.33045
URIAAL_R03424	5.92298	6.71077	6.40751	5.75076	6.23184	6.69939
URIAAL_R03419	7.96609	8.13657	7.12501	9.96328	7.88394	8.28881
URIAAL_R03389	10.0005	9.97427	9.77282	11.541	11.0172	10.0075
URIAAL_R03423	4.33045	4.33045	4.84202	4.66883	4.64492	4.33045
URIAAL_R00355	4.802	4.33045	4.84202	5.21391	5.09334	4.33045
URIAAL_R00384	4.802	4.33045	4.33045	4.80791	4.33045	4.75236
URIAAL_R03388	4.33045	4.99998	4.33045	5.15015	4.33045	5.34646
URIAAL_R00354	4.33045	5.14689	5.33833	5.27289	4.33045	4.92503
URIAAL_R03422	4.99443	5.59753	4.98862	5.88125	4.64492	4.84627
URIAAL_R00392	5.0712	4.66746	4.98862	5.08036	4.7743	5.11295
URIAAL_R00386	10.6577	10.3882	10.6394	10.7594	10.3249	10.0728
URIAAL_R03387	11.8032	11.7648	11.6212	12.2543	11.7734	11.5461
URIAAL_R03386	10.9955	10.8032	11.4134	11.4051	10.7866	11.3124
URIAAL_R00391	7.53541	7.55511	8.51699	7.60684	6.27091	8.10031
URIAAL_R03421	11.9883	12.4037	12.6542	11.4027	10.8299	12.2172
URIAAL_R00390	5.14018	5.26918	4.74887	6.13006	5.20807	5.6554
URIAAL_R05105	7.37278	9.83831	10.2252	6.49558	8.94642	8.01541
URIAAL_R09573	11.2747	11.6307	11.2754	11.0524	11.5794	10.6949
URIAAL_R09574	8.59711	8.50082	9.02953	6.98998	8.59823	8.19338
URIAAL_R15049	4.33045	4.33045	4.33045	4.91391	4.33045	4.84627
URIAAL_R05095	10.0515	9.90125	9.98913	11.8299	10.8153	10.1486
URIAAL_R05106	5.58747	4.33045	5.20759	5.99833	5.47885	5.62547
URIAAL_R05100	7.56078	6.43087	6.42276	7.57318	7.31811	7.94057
URIAAL_R05094	4.33045	4.33045	6.07615	4.33045	4.33045	7.93029
URIAAL_R09575	10.842	11.8098	11.7481	11.0852	11.273	11.4872
URIAAL_R05103	5.46148	4.33045	4.92014	5.15015	5.62354	4.75236
URIAAL_R15050	4.33045	4.33045	4.33045	4.80791	4.33045	4.33045
URIAAL_R09569	9.64938	9.28559	8.45157	9.74501	9.36115	8.94924
URIAAL_R05098	8.45232	8.55274	7.82502	9.68972	8.98798	9.59056
URIAAL_R09576	4.33045	4.33045	4.33045	4.33045	4.33045	4.33045
URIAAL_R05102	4.33045	4.33045	4.33045	4.33045	4.33045	4.33045
URIAAL_R14984	4.33045	4.33045	4.33045	4.66883	4.33045	4.33045
URIAAL_R09587	4.33045	4.33045	4.33045	4.80791	4.33045	4.33045
URIAAL_R09586	4.33045	4.33045	4.33045	4.33045	4.33045	4.33045
URIAAL_R09568	11.9669	11.7482	12.1848	11.4448	12.5824	11.7114
URIAAL_R09577	7.19963	6.77242	6.85786	6.95059	7.13965	6.46789
URIAAL_R09578	5.0712	5.21042	4.33045	5.15015	4.33045	4.33045
URIAAL_R05099	9.62381	9.64109	8.66402	9.59119	8.67834	9.69837
URIAAL_R09579	4.33045	4.33045	4.33045	4.33045	4.33045	4.33045
URIAAL_R09567	4.33045	4.33045	4.33045	5.64151	5.02819	4.33045
URIAAL_R09566	4.33045	4.33045	4.33045	4.66883	5.09334	4.33045
URIAAL_R05125	4.99443	4.33045	4.33045	4.33045	4.33045	4.33045
URIAAL_R05107	7.72663	5.37559	4.92014	5.94126	7.08861	5.4243
URIAAL_R05108	10.0248	8.30269	8.23111	8.85829	10.4881	9.19329
URIAAL_R09580	4.33045	4.33045	4.33045	4.33045	4.33045	4.33045
URIAAL_R05109	5.62616	7.36284	5.05022	5.27289	4.7743	4.84627
URIAAL_R09565	11.4085	11.5213	12.115	11.0689	11.1699	11.5024
URIAAL_R09564	4.33045	4.33045	4.33045	5.08036	5.20807	4.33045
URIAAL_R05122	6.22796	5.42433	5.85709	7.07773	6.14982	6.62223
URIAAL_R05110	13.4255	13.6157	13.9216	11.9196	12.5472	13.1451
URIAAL_R09591	8.82854	8.46514	9.46	7.80808	8.51718	8.6395
URIAAL_R09563	5.20321	5.26918	5.61535	5.47508	5.25958	4.62931
URIAAL_R05124	5.83261	6.64615	5.94969	6.85401	7.06765	5.7404
URIAAL_R05123	8.64098	8.52702	8.46908	9.18521	9.40882	8.55871
URIAAL_R05093	10.3656	11.0423	11.1938	10.1272	11.6	10.2331
URIAAL_R05092	4.33045	4.91156	4.33045	5.27289	4.33045	4.33045
URIAAL_R05101	4.99443	4.33045	4.33045	5.37969	4.33045	4.33045
URIAAL_R09562	4.33045	4.33045	4.33045	5.42861	4.33045	4.33045
URIAAL_R09561	4.802	6.12354	5.1588	5.71557	4.95573	4.33045
URIAAL_R09593	9.96024	9.45626	9.86407	10.0169	10.229	9.43299
URIAAL_R09581	11.9249	11.5423	10.939	12.27	11.1523	11.3923
URIAAL_R09588	4.33045	4.66746	5.1588	5.00267	4.33045	4.75236
URIAAL_R14983	4.99443	5.26918	5.20759	4.33045	4.873	4.75236
URIAAL_R05091	12.1391	11.9993	12.3585	11.8206	11.5399	11.8136
URIAAL_R05090	9.70106	10.2342	10.1878	8.6659	9.31185	9.93906
URIAAL_R09560	4.33045	4.33045	4.33045	5.60241	4.33045	5.11295
URIAAL_R05111	7.48326	8.93149	8.53372	9.5511	9.21256	8.8083
URIAAL_R05089	5.50531	5.32403	5.25352	5.85003	4.33045	5.34646
URIAAL_R09582	12.4027	12.2181	12.3571	11.8746	11.8646	12.1623
URIAAL_R05112	10.0142	10.6806	11.0294	8.10642	8.37379	10.0935
URIAAL_R09589	9.5651	9.60679	9.5382	9.24201	9.67261	9.536
URIAAL_R05113	4.33045	4.33045	4.33045	5.21391	4.33045	4.33045
URIAAL_R05114	5.14018	5.14689	5.05022	5.32794	4.33045	5.4243
URIAAL_R09571	4.802	4.33045	4.62683	4.33045	4.33045	4.33045
URIAAL_R05088	4.33045	4.33045	4.33045	4.80791	4.7743	4.33045
URIAAL_R05115	4.33045	4.33045	4.33045	4.33045	4.33045	4.33045
URIAAL_R05116	4.33045	5.37559	5.1588	5.15015	5.15292	4.75236
URIAAL_R09583	11.3706	11.0832	11.5306	11.0295	10.7274	10.8465
URIAAL_R14717	13.4392	13.0812	12.6553	12.3698	13.3633	12.6383
URIAAL_R05096	13.2771	12.4279	12.1896	15.4492	14.426	13.279
URIAAL_R09572	4.33045	4.33045	4.33045	4.33045	4.33045	4.33045
URIAAL_R09594	12.7162	12.6732	12.2995	12.5327	13.368	12.3533
URIAAL_R05117	10.0923	10.0647	10.3688	9.86172	10.7653	10.0728
URIAAL_R05118	10.4752	10.956	11.1283	9.1962	9.70616	11.0149
URIAAL_R05097	7.87509	6.90163	6.56619	8.1468	7.91893	7.95585
URIAAL_R05126	9.68214	9.62505	9.53985	9.04325	9.61724	9.31419
URIAAL_R09570	5.97952	6.14818	5.97173	5.64151	6.25152	6.06894
URIAAL_R05119	11.2075	10.8462	11.0329	10.4972	11.0864	11.0688
URIAAL_R05120	10.8093	10.9846	11.3902	10.3853	10.6605	10.7905
URIAAL_R09590	11.1652	11.2467	11.6643	10.4928	11.159	11.1618
URIAAL_R09592	10.6741	10.7432	11.0341	10.082	10.8192	10.5406
URIAAL_R05104	7.07489	6.6295	6.93228	5.91165	6.77444	6.55431
URIAAL_R09584	6.15859	6.99428	6.69551	6.68679	7.23642	7.08784
URIAAL_R05121	4.33045	4.33045	4.33045	4.33045	4.33045	4.33045
URIAAL_R09585	4.33045	4.33045	4.33045	6.07908	4.33045	4.33045
URIAAL_R04469	6.27215	7.4299	6.75576	8.42037	6.01545	7.37532
URIAAL_R15110	5.14018	5.51478	5.05022	5.21391	5.20807	5.46087
URIAAL_R13609	5.54724	6.14818	5.75623	6.27143	5.02819	5.38622
URIAAL_R04404	4.33045	4.33045	4.33045	6.02586	4.33045	4.33045
URIAAL_R04365	5.14018	5.84434	4.98862	6.91003	4.33045	5.05614
URIAAL_R13527	5.26152	4.33045	4.33045	5.67919	4.33045	4.33045
URIAAL_R13526	6.92456	6.07271	6.5797	7.12547	5.94214	7.0972
URIAAL_R04417	13.1776	12.5704	12.7643	12.4923	13.0067	12.5943
URIAAL_R04406	15.1626	14.2379	13.7478	16.9719	15.7253	14.8819
URIAAL_R04418	13.3863	13.4822	13.6523	12.9444	13.0399	13.2446
URIAAL_R13562	13.4422	12.6812	12.4797	12.1799	13.0792	12.5873
URIAAL_R04366	9.71603	10.7534	11.7659	8.72028	8.63011	10.381
URIAAL_R14913	7.71916	7.64624	7.94042	7.17162	8.17165	7.26404
URIAAL_R13528	7.7041	8.16471	7.76361	8.36773	7.77348	8.14982
URIAAL_R13529	10.711	10.4268	11.0757	10.2013	11.0542	10.7196
URIAAL_R04419	4.802	4.80598	4.33045	5.91165	5.39747	4.33045
URIAAL_R13530	6.31485	6.01964	5.92723	6.43822	5.99152	6.04831
URIAAL_R13531	11.6314	11.281	11.347	12.3012	11.8093	11.8847
URIAAL_R13563	12.7976	12.2145	11.889	11.8343	12.377	12.2061
URIAAL_R04367	4.33045	4.33045	4.62683	5.51938	4.33045	4.33045
URIAAL_R13564	4.33045	4.33045	4.33045	4.33045	4.33045	4.33045
URIAAL_R13532	4.33045	4.33045	4.33045	4.33045	4.33045	4.33045
URIAAL_R13565	5.26152	6.3504	5.58474	5.75076	4.64492	5.26101
URIAAL_R04368	8.22454	8.97964	7.54168	7.52993	7.9754	8.25222
URIAAL_R13566	9.99746	10.1498	9.1362	10.7832	10.725	9.44201
URIAAL_R13567	7.26323	7.39197	7.00285	7.04081	6.59247	6.08923
URIAAL_R13568	4.33045	5.55702	4.33045	5.21391	5.09334	4.33045
URIAAL_R13569	4.33045	4.33045	4.74887	4.91391	4.33045	4.33045
URIAAL_R04369	8.34537	9.12084	8.15948	8.35303	7.96429	8.32448
URIAAL_R13612	5.14018	5.14689	4.74887	4.33045	4.33045	4.33045
URIAAL_R13533	8.03372	8.62321	9.20037	6.79557	6.48306	7.99089
URIAAL_R04370	10.3296	10.6182	10.5438	10.9203	10.0446	11.053
URIAAL_R13570	10.7387	11.0692	11.211	11.3962	10.8637	10.9161
URIAAL_R13534	12.6961	12.2108	12.1806	12.0797	12.3814	12.0197
URIAAL_R04420	13.4319	13.4815	13.6077	12.5897	13.452	13.1486
URIAAL_R04402	9.58561	9.31089	7.75215	10.2601	9.01503	9.35106
URIAAL_R13556	11.3115	9.66482	10.0449	10.795	11.5189	11.8771
URIAAL_R04421	9.70482	6.74195	6.34462	9.37371	8.86547	8.55871
URIAAL_R04422	12.7613	12.737	12.8104	12.3226	12.2673	12.6134
URIAAL_R04371	8.78656	9.73188	9.64807	8.69335	9.23343	9.1674
URIAAL_R04372	8.27106	9.32586	8.14646	9.98085	9.16506	9.8779
URIAAL_R04413	5.14018	5.32403	6.0146	6.10484	5.86389	5.962
URIAAL_R04373	12.3602	12.0063	12.2164	12.8882	12.2678	12.1042
URIAAL_R04374	8.28119	9.85902	9.76294	8.56759	6.86309	9.93651
URIAAL_R13559	4.33045	4.33045	4.74887	4.66883	4.33045	4.62931
URIAAL_R04423	11.2298	10.9456	11.014	12.2308	11.7272	10.95
URIAAL_R04424	6.95079	6.69491	6.0146	7.99066	6.67954	6.68684
URIAAL_R04403	6.52718	7.13988	6.09598	8.23503	6.39888	6.92867
URIAAL_R14769	6.93774	7.32303	6.09598	9.66423	5.83657	7.08784
URIAAL_R13571	11.6569	11.397	11.5776	11.7714	11.6116	11.3237
URIAAL_R04375	12.7812	12.0346	11.7984	12.8517	12.975	12.4068
URIAAL_R04397	7.78504	6.95534	6.79066	9.36643	7.96985	8.13649
URIAAL_R04416	4.33045	4.33045	4.33045	4.33045	4.33045	4.33045
URIAAL_R13572	12.2531	12.518	12.4448	11.4856	11.8105	12.1186
URIAAL_R04425	10.4396	10.2784	10.2056	9.96006	8.96596	10.2881
URIAAL_R13573	10.5822	10.9138	11.0893	11.2752	11.0895	10.9532
URIAAL_R13574	4.33045	4.33045	4.33045	4.33045	4.33045	4.33045
URIAAL_R04376	5.46148	4.99998	5.29699	5.47508	5.20807	5.05614
URIAAL_R13575	11.1631	10.46	10.5642	11.1878	11.5385	10.6767
URIAAL_R13555	8.5726	6.19603	6.84689	7.95857	8.96041	7.95078
URIAAL_R13535	6.15859	6.57823	5.67397	9.27608	5.89057	6.55431
URIAAL_R04377	10.4575	10.2035	9.41385	10.4861	9.98568	10.1386
URIAAL_R04426	9.76542	9.97586	10.0036	9.20711	9.10086	9.34915
URIAAL_R04401	5.76806	6.19603	6.26139	6.47674	5.25958	5.6554
URIAAL_R04378	10.2483	10.8988	11.066	10.314	10.542	10.5787
URIAAL_R04379	6.88425	7.42051	7.16926	7.04081	6.83835	6.62223
URIAAL_R13576	11.6011	12.0362	12.2034	11.4539	11.777	11.3815
URIAAL_R13536	4.33045	5.14689	5.10659	4.80791	4.33045	4.75236
URIAAL_R04427	5.8008	6.09839	6.85786	5.00267	5.25958	6.10918
URIAAL_R13618	10.3845	10.4802	10.6324	10.6726	9.77577	11.1824
URIAAL_R13616	4.802	4.33045	4.33045	4.33045	4.33045	4.33045
URIAAL_R04428	5.76806	5.99219	6.09598	5.08036	5.58928	5.6554
URIAAL_R13537	10.1744	10.8972	10.8912	9.83562	9.93706	10.5178
URIAAL_R04429	9.43091	9.70161	9.60291	9.0614	9.24946	9.14104
URIAAL_R13614	8.82163	8.70575	9.18987	9.14322	9.57063	8.8924
URIAAL_R04430	9.32504	9.84178	9.82528	8.69335	9.03367	9.536
URIAAL_R04380	13.0888	13.6723	13.4574	13.1156	14.6389	12.8142
URIAAL_R13538	5.20321	5.07737	4.33045	5.00267	4.64492	4.92503
URIAAL_R04396	4.33045	4.33045	4.74887	4.33045	4.33045	5.05614
URIAAL_R04431	12.2709	11.6698	12.2346	11.1899	11.7165	11.8028
URIAAL_R04432	11.8985	11.5407	11.3517	10.8698	11.3839	11.5532
URIAAL_R04381	7.02659	6.01964	6.64528	6.78056	5.55383	7.04974
URIAAL_R04433	8.10402	7.95502	8.35691	7.80808	6.66542	8.38579
URIAAL_R04382	11.6833	11.6654	12.3237	11.3248	11.1066	11.929
URIAAL_R13558	6.0068	6.84572	6.70778	6.41852	6.19151	6.27552
URIAAL_R04434	9.69541	9.6371	9.71399	9.72048	9.78992	10.1364
URIAAL_R04435	5.54724	5.21042	6.91143	6.63732	5.20807	5.9394
URIAAL_R04383	7.89509	8.44237	7.7231	8.85829	8.20973	9.00147
URIAAL_R04384	9.8027	9.96793	9.8601	10.9724	10.1641	10.153
URIAAL_R13539	6.72527	6.26452	6.77913	7.82244	6.63672	7.56113
URIAAL_R13577	7.56078	8.24593	8.03306	9.43298	8.50958	7.9095
URIAAL_R04436	11.4409	11.5083	10.9706	11.4851	11.1596	11.3237
URIAAL_R04437	7.06297	7.84083	7.77497	8.2189	7.66752	8.03472
URIAAL_R04438	8.1267	8.65522	7.92522	8.63387	8.68172	9.25808
URIAAL_R04409	4.33045	4.33045	4.62683	5.56176	5.51706	5.81922
URIAAL_R14914	5.0712	4.80598	4.33045	4.80791	5.09334	5.16556
URIAAL_R04407	5.66346	5.26918	6.03547	6.71878	5.72003	7.22204
URIAAL_R04412	7.23179	7.9806	7.92012	8.95859	8.6371	8.43374
URIAAL_R13578	4.99443	5.14689	4.62683	4.33045	4.33045	4.33045
URIAAL_R13540	4.99443	5.26918	6.1155	4.91391	4.95573	5.68449
URIAAL_R13541	8.61722	8.8749	8.65793	8.57182	8.05088	9.00878
URIAAL_R04385	9.75821	9.83831	9.82663	10.3526	10.2301	9.97554
URIAAL_R14912	5.14018	4.33045	4.62683	6.58593	4.873	5.53004
URIAAL_R14911	5.36713	4.33045	5.1588	5.78484	5.20807	5.21473
URIAAL_R04400	6.97652	7.6622	7.37911	7.93237	6.49926	7.52038
URIAAL_R04386	10.4066	10.7348	11.3408	11.2332	10.3368	10.9051
URIAAL_R04408	5.83261	6.01964	5.75623	7.3322	5.39747	6.12881
URIAAL_R14916	4.99443	4.33045	4.92014	4.91391	4.33045	5.62547
URIAAL_R04387	11.1828	10.7264	10.2697	11.3279	11.2556	10.7891
URIAAL_R04440	10.6065	10.7358	10.7969	10.4861	11.087	10.7122
URIAAL_R04441	6.41571	7.20731	7.00285	7.82244	6.87529	6.93918
URIAAL_R13579	10.0172	9.17971	9.1665	10.4325	9.52997	9.93906
URIAAL_R04442	9.03977	9.35533	9.32072	10.6478	9.6878	9.48105
URIAAL_R13542	6.93774	7.70901	8.23521	7.97791	7.07817	7.54768
URIAAL_R13580	9.15965	10.4024	10.6547	9.48767	8.98251	10.1606
URIAAL_R04443	5.95159	6.43087	6.79066	5.60241	5.80857	6.02731
URIAAL_R13560	11.3987	11.1086	11.2897	11.2733	11.5915	11.3669
URIAAL_R04414	10.848	10.6473	10.8338	11.8063	11.5174	10.2841
URIAAL_R04471	7.52685	6.75727	6.59308	7.75665	7.76709	6.97023
URIAAL_R04399	10.4249	10.4129	10.9111	11.2425	10.7044	10.8377
URIAAL_R04388	9.98825	9.75969	10.2517	10.736	10.1049	10.3207
URIAAL_R04474	9.92526	10.6864	10.8815	10.0323	8.91516	9.97802
URIAAL_R13581	11.8886	11.5148	11.6212	12.5486	12.2409	11.5561
URIAAL_R04444	10.2776	9.87945	10.2149	10.2297	10.6554	9.78881
URIAAL_R13582	9.58765	9.06838	8.87026	10.9708	9.83763	9.64938
URIAAL_R13543	4.33045	4.80598	4.33045	4.33045	4.33045	4.33045
URIAAL_R13613	4.33045	4.33045	4.33045	4.33045	4.33045	4.33045
URIAAL_R13544	4.99443	5.14689	4.74887	5.27289	4.7743	4.75236
URIAAL_R13545	4.802	4.33045	4.74887	5.97014	4.33045	4.33045
URIAAL_R04445	4.33045	4.66746	4.92014	5.15015	4.873	5.11295
URIAAL_R04467	5.31595	5.14689	4.33045	5.78484	5.58928	4.84627
URIAAL_R04470	4.33045	5.21042	4.33045	5.56176	4.33045	5.05614
URIAAL_R04446	7.88179	7.5292	7.18658	7.3322	7.25499	8.13202
URIAAL_R13546	4.33045	4.80598	4.33045	4.66883	4.33045	4.33045
URIAAL_R04405	4.33045	4.33045	4.33045	4.33045	4.33045	4.33045
URIAAL_R13617	4.802	4.33045	5.05022	4.33045	5.25958	5.05614
URIAAL_R04478	4.33045	4.33045	4.33045	5.51938	4.33045	4.33045
URIAAL_R04448	4.33045	4.33045	4.33045	5.00267	4.33045	4.33045
URIAAL_R13583	10.4553	10.667	10.5868	10.4658	10.1446	10.5041
URIAAL_R04447	12.1815	12.8077	13.5703	11.8268	12.6332	13.0695
URIAAL_R13584	10.8972	11.2726	11.3503	11.0771	10.5596	10.9411
URIAAL_R13547	5.73431	5.55702	5.25352	6.51416	6.29	6.40691
URIAAL_R13548	5.36713	5.74539	4.62683	6.05277	5.20807	5.21473
URIAAL_R13585	4.33045	4.33045	4.33045	4.33045	4.33045	4.33045
URIAAL_R13586	4.99443	4.99998	4.92014	5.71557	4.33045	4.33045
URIAAL_R04389	8.55602	8.20319	8.47602	8.52455	8.82934	8.29282
URIAAL_R13587	6.64629	6.04647	5.48686	8.73922	6.3088	6.46789
URIAAL_R04390	12.5662	11.9915	12.6116	11.4984	12.5395	11.9738
URIAAL_R04449	5.46148	4.80598	5.3778	5.00267	5.47885	5.05614
URIAAL_R13549	7.97237	7.58893	8.29932	6.97698	6.89938	7.80637
URIAAL_R04410	4.33045	4.33045	4.33045	4.33045	4.33045	4.33045
URIAAL_R13557	4.33045	4.33045	4.33045	4.33045	4.33045	4.33045
URIAAL_R13588	6.70984	7.37262	7.98506	5.71557	6.45004	6.85276
URIAAL_R13589	13.3846	13.1189	13.826	12.184	12.8884	13.2711
URIAAL_R13615	12.1822	11.8217	11.8585	11.0874	11.6431	11.2629
URIAAL_R04450	8.88929	8.97331	8.50347	9.35911	9.17228	9.32203
URIAAL_R13554	5.26152	5.55702	5.8078	5.15015	5.39747	5.26101
URIAAL_R13610	8.53079	6.41122	6.39207	7.997	8.12755	7.87773
URIAAL_R13607	8.10972	6.72645	6.70778	8.18607	8.30953	8.26452
URIAAL_R04451	10.4019	10.5729	10.7108	10.6627	11.043	10.7634
URIAAL_R13590	4.33045	4.66746	4.92014	4.33045	4.33045	4.92503
URIAAL_R04452	4.33045	4.33045	5.05022	5.00267	4.33045	4.84627
URIAAL_R13591	4.33045	4.33045	4.33045	4.33045	4.33045	4.33045
URIAAL_R13592	9.18139	9.56326	9.16864	8.44828	8.91228	8.93907
URIAAL_R13550	4.33045	4.33045	5.1588	4.33045	4.33045	4.75236
URIAAL_R04411	5.26152	6.26452	6.93228	7.49435	6.43321	7.65814
URIAAL_R13593	5.26152	5.59753	7.16926	6.13006	6.3456	5.81922
URIAAL_R13594	6.08508	6.75727	6.15362	5.37969	5.30804	6.52613
URIAAL_R13551	7.16671	8.20319	6.56619	7.74915	7.43639	8.21044
URIAAL_R04453	6.39616	5.9353	6.34462	5.27289	7.48418	5.86882
URIAAL_R04398	11.6071	11.5529	11.2362	10.8552	11.277	11.305
URIAAL_R13611	4.66463	4.33045	4.33045	5.00267	5.09334	4.33045
URIAAL_R13595	4.33045	5.6365	5.25352	5.27289	4.33045	4.33045
URIAAL_R04454	4.33045	4.33045	4.33045	5.00267	4.33045	4.33045
URIAAL_R04473	4.33045	4.33045	4.33045	4.33045	4.33045	4.33045
URIAAL_R04476	4.33045	4.33045	4.33045	4.33045	4.33045	4.33045
URIAAL_R04477	4.33045	4.33045	4.33045	4.33045	4.33045	4.33045
URIAAL_R04455	4.33045	4.99998	4.74887	5.32794	4.33045	4.33045
URIAAL_R13561	5.14018	5.99219	6.55253	4.33045	5.30804	4.33045
URIAAL_R04456	10.1986	10.0736	9.35306	10.5291	11.1626	10.2801
URIAAL_R13608	9.20547	8.81952	8.33032	8.16937	9.619	8.87917
URIAAL_R04457	4.33045	4.33045	4.33045	4.33045	4.33045	4.75236
URIAAL_R04458	7.57744	8.54848	7.06058	7.58167	8.1075	9.07759
URIAAL_R13596	10.2276	10.263	9.95732	9.49658	8.84148	10.1106
URIAAL_R04475	6.29368	7.05682	6.83583	7.3322	6.57739	7.5409
URIAAL_R04472	5.97952	5.87547	5.20759	5.75076	5.89057	5.7673
URIAAL_R04391	5.14018	4.91156	4.74887	5.47508	5.09334	5.56286
URIAAL_R04392	10.0456	10.4802	10.6668	9.36643	9.12589	10.0576
URIAAL_R04393	10.648	11.1762	10.9864	9.95036	10.4169	10.6752
URIAAL_R04459	4.33045	4.33045	4.33045	4.66883	4.33045	4.33045
URIAAL_R04460	4.33045	4.33045	4.33045	4.33045	4.33045	4.33045
URIAAL_R04394	5.20321	4.33045	4.33045	4.66883	4.7743	4.99405
URIAAL_R04461	4.33045	4.33045	4.33045	4.33045	4.33045	4.33045
URIAAL_R13597	4.33045	4.33045	4.33045	4.33045	4.33045	4.33045
URIAAL_R13598	10.3405	10.2487	10.1297	11.8063	11.1723	10.8059
URIAAL_R13599	8.50511	8.98908	8.67009	10.4838	10.813	9.14104
URIAAL_R04395	11.4113	11.4824	11.403	11.3097	11.1253	11.5369
URIAAL_R04415	10.5903	10.7826	10.696	10.8447	10.7597	10.3622
URIAAL_R04468	7.79217	7.42051	7.34881	8.07087	7.53796	7.78367
URIAAL_R13552	6.61334	7.19629	5.58474	5.88125	7.07817	6.77235
URIAAL_R13553	11.7204	11.2962	11.7803	12.1163	11.4733	11.8153
URIAAL_R04462	7.7041	8.55274	8.56661	7.62338	6.94631	8.51483
URIAAL_R13600	14.544	14.1552	13.6252	14.3892	14.3233	14.0052
URIAAL_R13601	8.7323	9.43571	9.44948	9.12895	8.62309	8.21044
URIAAL_R04463	11.594	11.9033	12.0321	11.3782	11.4162	11.5037
URIAAL_R04464	4.802	5.26918	4.62683	5.37969	4.95573	4.33045
URIAAL_R14915	4.33045	4.33045	4.33045	5.15015	4.33045	4.33045
URIAAL_R13602	6.43496	6.43087	4.33045	6.13006	5.72003	5.05614
URIAAL_R13603	13.608	14.0307	13.9856	12.613	13.5429	13.616
URIAAL_R04465	4.33045	4.33045	4.33045	4.33045	4.33045	4.33045
URIAAL_R04466	10.6343	10.147	10.3679	10.6696	10.6792	10.498
URIAAL_R13604	8.47455	6.61263	6.27848	8.56334	8.53226	6.6354
URIAAL_R13605	11.6549	11.6771	11.8321	10.7247	11.8896	11.424
URIAAL_R13606	6.08508	5.37559	5.25352	5.37969	5.47885	5.68449
URIAAL_R10717	4.33045	5.21042	4.74887	5.15015	4.33045	4.33045
URIAAL_R10719	7.95344	8.13088	8.34178	8.28237	7.91893	8.50105
URIAAL_R10720	10.256	10.3472	10.2627	12.2345	11.0011	10.8177
URIAAL_R09779	4.66463	4.33045	4.33045	5.00267	4.33045	4.75236
URIAAL_R10722	4.33045	4.33045	4.33045	5.15015	4.7743	4.62931
URIAAL_R10709	4.33045	4.33045	4.33045	4.33045	4.33045	4.33045
URIAAL_R10710	8.02771	8.25642	8.48981	8.51578	8.23303	8.73376
URIAAL_R09766	5.54724	4.66746	5.20759	4.33045	4.33045	4.75236
URIAAL_R10716	4.33045	4.33045	4.33045	4.33045	4.33045	4.33045
URIAAL_R10721	4.33045	4.33045	4.33045	4.66883	4.33045	4.33045
URIAAL_R09771	4.33045	4.33045	4.33045	5.15015	4.33045	4.33045
URIAAL_R09769	4.802	4.33045	4.33045	4.33045	4.7743	4.33045
URIAAL_R09768	4.802	4.33045	4.33045	4.33045	4.33045	4.75236
URIAAL_R09772	4.33045	4.33045	4.33045	4.33045	4.7743	4.62931
URIAAL_R09773	4.99443	4.99998	4.98862	5.78484	5.6567	4.33045
URIAAL_R09774	7.78504	8.56121	7.50105	10.1958	9.62953	6.76046
URIAAL_R10723	12.548	11.5332	11.6051	13.2318	12.8778	11.6835
URIAAL_R09775	11.9833	12.2841	11.9315	12.1424	13.0629	12.0893
URIAAL_R09770	4.802	5.32403	5.1588	5.37969	5.09334	5.26101
URIAAL_R10724	10.7979	11.0017	10.9483	10.9054	10.4628	11.1974
URIAAL_R10729	10.7953	9.08315	8.71183	11.6917	11.106	10.1737
URIAAL_R10718	5.83261	6.39127	5.99336	7.1018	5.35389	6.18588
URIAAL_R10731	5.50531	5.71031	5.58474	6.39851	5.80857	5.91635
URIAAL_R10725	8.64491	8.33768	8.56986	9.30683	8.82322	8.61733
URIAAL_R10711	5.92298	6.43087	6.07615	6.05277	5.47885	5.56286
URIAAL_R09765	6.39616	6.41122	6.60632	7.19413	6.87529	6.64845
URIAAL_R10726	4.90672	5.6365	6.29534	5.81791	4.95573	4.99405
URIAAL_R10727	4.99443	5.32403	5.48686	5.37969	5.20807	5.7404
URIAAL_R10728	10.9216	10.1428	9.82392	12.6956	11.7141	10.4692
URIAAL_R10730	10.4719	9.95034	9.69631	12.3746	11.5297	10.419
URIAAL_R10712	9.01576	9.223	9.45124	10.4079	9.73733	9.2437
URIAAL_R09767	9.87781	10.5709	10.2797	12.0402	10.237	9.85783
URIAAL_R09777	6.56232	6.99428	5.97173	7.51225	6.85077	6.18588
URIAAL_R09778	9.76182	9.90955	9.78402	9.96167	10.3119	9.60348
URIAAL_R10713	6.87055	7.27161	7.84132	7.87847	8.47486	7.04005
URIAAL_R10714	12.297	12.2228	12.4025	11.9204	12.4441	11.9917
URIAAL_R09776	6.08508	6.12354	7.10691	5.71557	6.3636	7.29675
URIAAL_R10715	4.99443	5.55702	5.52058	5.15015	4.33045	5.68449
URIAAL_R08464	10.1235	9.98845	10.1187	10.6	11.1896	10.3507
URIAAL_R07983	4.33045	4.99998	4.33045	4.33045	4.33045	4.33045
URIAAL_R12641	8.71001	8.25642	7.43781	7.24886	7.67438	8.70702
URIAAL_R07960	5.50531	5.71031	6.46747	5.75076	6.23184	5.6554
URIAAL_R07961	6.61334	6.17234	6.49644	9.01247	6.01545	6.54029
URIAAL_R12649	5.0712	6.01964	5.92723	9.52519	5.47885	5.91635
URIAAL_R12668	5.14018	4.33045	4.33045	4.80791	4.33045	4.33045
URIAAL_R07962	4.33045	4.33045	4.33045	5.15015	4.33045	4.33045
URIAAL_R12667	4.33045	4.33045	4.33045	4.33045	4.33045	4.33045
URIAAL_R07982	4.33045	4.33045	4.33045	4.33045	4.33045	4.33045
URIAAL_R07981	4.33045	4.33045	4.33045	4.33045	4.33045	4.33045
URIAAL_R12666	4.33045	4.80598	4.33045	5.32794	4.33045	4.75236
URIAAL_R12665	14.6537	12.9643	12.9351	14.689	14.6022	13.8471
URIAAL_R12642	8.44784	7.4299	8.02834	7.77154	9.71443	7.7664
URIAAL_R12664	8.05754	7.33309	7.54168	7.00287	8.31826	7.74305
URIAAL_R14595	4.99443	5.42433	5.25352	5.27289	5.55383	4.84627
URIAAL_R07980	6.43496	7.89571	6.51069	6.13006	6.70735	6.20433
URIAAL_R12643	11.697	11.1707	11.6879	11.616	11.6916	10.8661
URIAAL_R12663	10.0066	10.2578	9.9449	8.35795	10.3368	10.1196
URIAAL_R12662	14.041	13.4445	13.7015	13.4368	14.177	13.3029
URIAAL_R07979	5.46148	5.51478	5.4519	5.21391	5.51706	4.75236
URIAAL_R12661	4.33045	5.26918	5.55318	5.60241	4.7743	4.62931
URIAAL_R07978	5.41552	5.14689	4.92014	5.71557	5.25958	4.99405
URIAAL_R12660	8.34537	6.94211	6.65802	7.49435	7.46843	6.99054
URIAAL_R07977	12.286	11.0248	9.79237	11.4075	10.8895	10.06
URIAAL_R07976	6.18215	5.42433	5.1588	5.47508	5.58928	5.49607
URIAAL_R07975	4.99443	4.66746	4.33045	4.33045	4.33045	4.84627
URIAAL_R12659	4.33045	4.33045	4.33045	5.00267	4.95573	4.33045
URIAAL_R12658	4.66463	4.33045	4.74887	5.32794	5.02819	4.33045
URIAAL_R07974	9.82012	8.44237	8.71769	10.775	11.2305	9.78598
URIAAL_R12657	8.26596	7.01964	6.59308	9.99507	9.07539	8.60773
URIAAL_R12656	4.33045	4.33045	4.62683	4.33045	4.33045	4.33045
URIAAL_R07964	4.33045	4.33045	4.74887	4.33045	4.33045	4.33045
URIAAL_R15197	5.36713	4.33045	4.33045	5.00267	4.33045	5.21473
URIAAL_R12644	5.89364	5.14689	4.74887	5.47508	4.95573	5.11295
URIAAL_R07963	4.33045	4.99998	4.33045	5.00267	4.64492	4.33045
URIAAL_R15196	4.33045	4.33045	4.33045	4.33045	4.33045	4.33045
URIAAL_R07973	5.54724	5.87547	5.1588	6.60328	5.96709	6.55431
URIAAL_R12655	7.42911	7.42051	6.91143	6.27143	7.2176	7.15209
URIAAL_R12645	4.33045	4.91156	4.33045	4.33045	4.33045	4.33045
URIAAL_R12646	4.33045	4.33045	4.33045	5.15015	4.33045	4.33045
URIAAL_R07972	4.33045	4.33045	4.33045	5.00267	4.33045	4.33045
URIAAL_R07971	4.33045	4.33045	4.33045	4.33045	4.7743	4.33045
URIAAL_R12647	10.6893	9.95516	10.8168	10.7285	10.4311	10.1769
URIAAL_R07965	10.0051	9.79058	10.3772	9.16856	9.76943	9.51905
URIAAL_R07970	9.02781	8.71337	9.3847	7.92574	8.69852	8.48714
URIAAL_R12640	12.6892	11.9309	12.1686	11.9644	12.8418	12.7816
URIAAL_R07959	5.20321	5.67405	5.29699	5.15015	5.47885	5.81922
URIAAL_R12648	4.33045	4.33045	4.33045	4.33045	4.33045	4.33045
URIAAL_R12654	4.33045	4.33045	4.84202	4.80791	4.33045	4.33045
URIAAL_R12653	12.5524	11.6776	12.0143	11.6554	12.3096	11.6238
URIAAL_R07967	4.90672	5.9353	5.61535	4.33045	4.95573	5.21473
URIAAL_R12669	5.73431	6.39127	6.07615	6.20276	6.10666	5.962
URIAAL_R12652	8.94758	9.13507	9.09852	9.12608	8.93229	9.13882
URIAAL_R07969	11.3225	9.88114	9.75869	12.7828	11.6586	11.0383
URIAAL_R07968	11.5787	12.0831	11.5566	10.0536	11.3472	11.7648
URIAAL_R12639	11.9369	12.0129	12.2195	11.4175	11.7321	12.0064
URIAAL_R07958	4.33045	4.33045	4.33045	4.33045	4.7743	4.33045
URIAAL_R07957	4.33045	4.33045	4.33045	4.33045	4.33045	4.33045
URIAAL_R07956	4.802	4.33045	4.92014	4.33045	4.33045	4.33045
URIAAL_R12638	4.33045	4.33045	4.92014	5.37969	5.20807	4.92503
URIAAL_R12651	5.86354	5.26918	5.25352	4.33045	4.95573	5.7404
URIAAL_R12650	7.25283	6.90163	6.73199	7.24886	7.23642	7.32078
URIAAL_R06066	8.8112	8.67876	8.92955	8.73545	8.53226	8.90291
URIAAL_R06106	11.7291	12.0044	12.5139	11.9907	12.0794	11.7695
URIAAL_R09012	8.10972	7.05682	7.11599	9.86172	7.67438	8.05849
URIAAL_R09047	11.0961	11.4088	11.6356	10.1372	9.38622	10.659
URIAAL_R09053	4.99443	4.66746	4.62683	4.33045	4.33045	4.75236
URIAAL_R06065	10.4981	9.31839	9.0436	9.71667	10.3842	9.65869
URIAAL_R09054	5.8008	5.9353	6.26139	6.43822	5.80857	5.7404
URIAAL_R09011	10.3357	10.6941	11.1958	10.8439	10.1011	10.7438
URIAAL_R09050	9.45342	9.86245	9.91846	9.75804	9.82241	9.32594
URIAAL_R06137	4.66463	4.91156	4.33045	5.81791	4.7743	5.56286
URIAAL_R06064	8.38818	8.24593	7.87337	8.21348	8.13746	8.6332
URIAAL_R06055	9.30785	9.44944	9.08499	9.78921	8.96596	8.9467
URIAAL_R06107	10.6836	10.9113	11.2198	11.791	11.0716	11.0167
URIAAL_R15324	8.77229	8.89513	9.03892	8.96504	8.57293	8.96436
URIAAL_R06108	4.90672	5.21042	6.24406	4.66883	5.02819	5.34646
URIAAL_R06109	8.51372	9.14073	8.51699	9.05235	8.08204	8.76577
URIAAL_R06056	7.71165	7.97425	8.08407	8.20804	7.53796	7.74305
URIAAL_R06057	10.496	10.4464	10.8148	10.2588	10.451	10.3603
URIAAL_R06058	4.33045	4.33045	4.33045	4.33045	4.95573	4.33045
URIAAL_R09087	4.802	4.33045	4.33045	4.33045	4.33045	5.16556
URIAAL_R09010	5.86354	7.25051	7.21215	7.67979	7.08861	6.18588
URIAAL_R09083	5.0712	5.55702	4.74887	4.33045	4.873	5.26101
URIAAL_R06060	7.97237	8.42854	7.69941	8.39189	8.04034	8.71002
URIAAL_R06062	7.11004	6.90163	6.90088	8.91599	7.93611	7.83424
URIAAL_R06063	4.802	4.99998	5.83272	5.88125	5.20807	5.59465
URIAAL_R06061	11.7691	12.0339	11.4179	11.5394	11.2803	11.5845
URIAAL_R09055	7.25283	7.31289	8.07493	8.02824	7.30926	7.5409
URIAAL_R06073	5.86354	6.39127	7.12501	6.43822	6.25152	6.78414
URIAAL_R06110	11.0296	11.3257	11.5256	11.9179	11.3839	10.9991
URIAAL_R09056	4.33045	4.33045	4.33045	6.179	4.95573	4.33045
URIAAL_R09057	4.33045	4.33045	4.33045	5.32794	4.33045	4.33045
URIAAL_R09081	4.33045	4.33045	4.33045	6.20276	4.33045	4.33045
URIAAL_R06130	5.14018	4.99998	5.48686	7.3322	5.02819	5.9394
URIAAL_R09040	5.97952	5.21042	4.98862	7.34227	5.35389	5.7673
URIAAL_R09085	6.64629	7.04454	6.39207	9.34437	6.23184	6.86387
URIAAL_R09037	8.75788	8.25119	8.54697	9.98403	9.27877	8.68284
URIAAL_R06067	10.7802	10.2975	10.6923	11.018	11.2613	10.5271
URIAAL_R06068	7.25283	6.87396	6.17224	8.12963	7.30036	7.21348
URIAAL_R06069	6.72527	6.07271	5.99336	7.19413	6.23184	6.68684
URIAAL_R06070	8.50078	7.75433	7.16926	10.429	8.12755	8.01054
URIAAL_R06111	11.6314	12.1823	11.8987	10.5301	11.0398	11.7486
URIAAL_R09058	15.0868	13.234	12.5051	15.8363	15.12	13.937
URIAAL_R06112	11.8059	11.5692	12.2863	11.5975	11.3397	11.6443
URIAAL_R09041	13.7999	13.9819	15.0728	14.7648	14.1726	14.0611
URIAAL_R06071	11.8878	12.7752	12.4745	12.3429	12.4763	11.9516
URIAAL_R09059	4.802	4.80598	4.74887	5.47508	4.64492	4.75236
URIAAL_R06132	12.0089	11.5332	11.9694	10.6256	11.0239	11.2471
URIAAL_R06072	10.797	10.574	10.8161	10.7123	10.6614	10.4434
URIAAL_R06113	6.11008	6.43087	6.74393	5.71557	5.99152	6.06894
URIAAL_R06114	5.54724	6.21928	5.67397	5.47508	4.95573	5.38622
URIAAL_R06115	8.25572	8.367	8.17238	7.54739	7.99192	8.12753
URIAAL_R06116	4.99443	4.33045	4.62683	4.80791	4.33045	4.99405
URIAAL_R09060	5.36713	5.90577	5.20759	5.78484	5.20807	5.62547
URIAAL_R09061	4.33045	4.33045	4.33045	4.33045	4.33045	4.33045
URIAAL_R09062	4.90672	4.66746	4.84202	5.08036	4.33045	4.75236
URIAAL_R09063	5.14018	4.33045	5.20759	4.33045	4.33045	5.05614
URIAAL_R09036	11.954	11.9723	12.1184	11.0763	11.2836	11.5775
URIAAL_R06117	10.1825	10.1244	9.85878	9.36399	9.91714	9.67867
URIAAL_R09064	6.27215	6.94211	6.7675	6.92369	6.59247	6.49733
URIAAL_R09065	8.55602	8.36215	8.04247	9.16016	7.96429	7.44972
URIAAL_R09039	10.2939	10.6845	11.0994	9.73185	10.0314	10.06
URIAAL_R09035	8.09254	8.23005	8.29539	8.54623	8.36116	8.96686
URIAAL_R06118	8.16006	8.86468	8.70298	9.13181	7.87803	8.84144
URIAAL_R06098	11.2311	11.3263	11.6224	11.1166	10.7709	10.9794
URIAAL_R09052	5.86354	5.84434	6.43784	5.27289	5.55383	6.14813
URIAAL_R14824	11.3581	11.9857	11.8277	9.59949	11.5008	12.0905
URIAAL_R09072	11.2492	12.0772	11.641	9.21794	9.75668	11.6582
URIAAL_R14822	4.33045	5.71031	4.33045	5.37969	5.20807	4.33045
URIAAL_R06074	11.0796	10.3337	10.7398	10.2808	10.7509	10.8425
URIAAL_R09013	6.84271	7.5292	6.80209	8.68946	8.02972	8.68892
URIAAL_R09014	10.4675	10.6433	11.037	10.5623	11.047	10.5448
URIAAL_R09082	9.06046	7.70131	9.23754	8.52017	7.98093	7.57446
URIAAL_R09015	11.7883	11.7803	12.2727	11.1885	11.9934	11.827
URIAAL_R09048	7.65008	7.4939	8.11561	8.769	7.47633	8.15864
URIAAL_R09073	4.33045	5.55702	4.62683	6.22607	5.09334	5.4243
URIAAL_R09016	4.33045	4.33045	4.74887	5.15015	4.33045	4.33045
URIAAL_R09074	13.4076	12.6359	12.6904	12.4198	12.9049	12.5881
URIAAL_R06075	9.47997	9.79775	10.2637	9.97289	9.42504	10.2005
URIAAL_R09017	11.7637	11.5555	12.2521	11.3273	11.9146	11.6356
URIAAL_R09075	10.9305	11.0225	11.355	10.912	11.0483	10.6942
URIAAL_R06133	6.93774	7.00702	7.21215	7.6955	7.42827	7.04974
URIAAL_R09018	4.33045	4.33045	4.74887	5.64151	4.7743	4.33045
URIAAL_R09019	10.4774	11.2591	9.53985	13.0681	10.1856	11.7017
URIAAL_R09049	10.7891	10.9236	10.6378	11.0636	10.9565	11.0137
URIAAL_R09076	8.34537	8.45607	8.22699	8.52891	8.39458	8.32056
URIAAL_R09020	7.61019	7.5028	6.37645	8.52455	7.65369	7.58766
URIAAL_R09077	10.511	10.387	10.2836	10.7257	10.5513	10.4015
URIAAL_R09078	5.86354	6.21928	5.3778	6.62041	5.62354	6.08923
URIAAL_R06125	11.9305	12.1078	12.4163	11.7167	11.921	11.906
URIAAL_R06136	5.14018	4.33045	5.05022	6.05277	4.7743	4.33045
URIAAL_R06126	4.33045	4.33045	4.33045	4.80791	4.7743	4.33045
URIAAL_R06127	5.83261	5.6365	4.33045	5.94126	5.20807	5.16556
URIAAL_R09079	10.6635	10.4712	10.1814	10.5171	10.5769	10.3372
URIAAL_R09021	5.58747	5.26918	5.1588	7.31182	5.89057	5.89283
URIAAL_R06078	9.90255	9.69778	9.99878	10.1654	9.83914	9.9224
URIAAL_R06079	6.33566	6.59554	6.73199	6.41852	7.0028	6.35921
URIAAL_R06076	10.3051	10.2473	10.8385	9.93896	10.658	10.4144
URIAAL_R06077	6.49107	6.17234	5.72951	7.06553	6.94631	6.91809
URIAAL_R06134	9.85771	9.72813	9.82256	9.48319	9.70948	9.56271
URIAAL_R09084	5.92298	5.42433	5.4519	6.15477	5.39747	5.84429
URIAAL_R09022	5.14018	6.07271	5.25352	4.33045	5.55383	5.34646
URIAAL_R09080	10.256	10.6323	11.0585	10.3853	10.0974	10.1049
URIAAL_R06080	5.0712	5.26918	5.78232	6.56835	5.02819	4.99405
URIAAL_R06128	11.4096	11.3182	11.728	11.6323	10.845	10.8979
URIAAL_R09046	9.83047	9.99626	10.2517	9.45373	9.89112	9.81126
URIAAL_R06081	11.4896	11.9923	12.1387	11.1087	11.4338	11.4868
URIAAL_R09023	13.0867	13.0551	13.2	12.9487	12.9911	13.0637
URIAAL_R09024	6.03346	5.90577	5.92723	6.73449	5.96709	6.87489
URIAAL_R09025	4.802	4.33045	4.33045	6.33656	4.7743	4.33045
URIAAL_R14825	11.3047	10.8165	10.4361	11.4175	11.0761	10.746
URIAAL_R06129	4.33045	4.33045	5.10659	5.00267	4.873	4.33045
URIAAL_R06102	4.33045	4.33045	4.33045	4.80791	4.33045	4.33045
URIAAL_R06103	4.33045	4.33045	4.33045	5.15015	4.33045	4.33045
URIAAL_R06100	4.33045	4.33045	4.33045	4.33045	4.873	4.33045
URIAAL_R09026	6.0068	5.42433	4.84202	11.3698	6.99168	6.06894
URIAAL_R09045	12.8559	12.0467	11.8522	13.0922	13.9852	11.9831
URIAAL_R06082	5.66346	7.04454	5.52058	5.78484	6.62213	6.00594
URIAAL_R09086	11.3587	10.8183	10.9264	11.6037	11.5254	10.7584
URIAAL_R09044	5.46148	4.99998	5.78232	5.85003	5.68884	4.84627
URIAAL_R09038	8.75788	7.39197	6.92189	10.5613	8.62309	9.1187
URIAAL_R06083	9.45118	9.40785	9.73435	9.47419	9.54859	9.40742
URIAAL_R06105	7.61019	8.20319	7.76361	8.52017	8.01364	8.71599
URIAAL_R06104	5.36713	5.47063	4.74887	6.76538	5.43905	5.05614
URIAAL_R06135	11.7493	11.5364	11.6969	11.5619	11.6744	11.6629
URIAAL_R09027	8.32593	7.77645	8.4621	9.13467	8.27852	8.00565
URIAAL_R09028	8.44784	9.03536	8.54697	9.86861	8.23765	8.62052
URIAAL_R09043	4.33045	5.6365	4.33045	5.08036	4.33045	4.33045
URIAAL_R06087	7.03882	6.14818	6.1155	7.67979	6.94631	7.03029
URIAAL_R06059	6.79986	7.58055	6.56619	7.27017	5.62354	5.86882
URIAAL_R06088	6.66247	6.04647	5.55318	7.00287	7.2176	6.66137
URIAAL_R09071	6.05955	5.59753	6.07615	6.97698	6.45004	6.02731
URIAAL_R06089	12.4549	12.1161	11.6898	12.5528	13.0078	12.1802
URIAAL_R06084	7.86836	7.65424	8.58919	7.62338	8.01902	7.8937
URIAAL_R06085	5.36713	6.21928	6.05598	5.91165	6.39888	8.12753
URIAAL_R06086	11.6146	11.3864	11.7705	11.4823	12.238	11.2716
URIAAL_R06090	12.6754	12.4834	12.6014	13.2969	12.9718	12.5322
URIAAL_R14686	4.802	6.09839	5.8078	6.02586	4.95573	5.26101
URIAAL_R09029	5.66346	6.4881	6.83583	5.91165	6.19151	6.29271
URIAAL_R06091	11.4234	11.105	11.5772	11.8343	11.6266	11.2761
URIAAL_R09070	9.26268	9.35046	9.72275	8.27199	9.19847	9.30631
URIAAL_R09069	4.99443	5.71031	5.64508	4.80791	5.35389	5.30481
URIAAL_R09088	6.84271	7.00702	7.46627	5.21391	6.29	6.35921
URIAAL_R06092	9.75821	9.75417	10.3576	9.68777	9.46087	9.58731
URIAAL_R09030	11.0266	10.5551	10.9477	10.9579	11.0535	10.8302
URIAAL_R06093	5.50531	6.14818	4.98862	6.56835	5.20807	5.38622
URIAAL_R09031	4.99443	5.07737	4.74887	5.71557	4.7743	4.33045
URIAAL_R06124	9.76722	9.34557	9.25174	10.6408	9.29871	9.69234
URIAAL_R15417	5.26152	5.47063	5.99336	5.37969	5.20807	5.34646
URIAAL_R06123	5.20321	4.80598	4.92014	4.91391	4.7743	4.84627
URIAAL_R09032	4.802	5.47063	5.64508	4.66883	4.33045	4.92503
URIAAL_R15323	4.33045	5.14689	5.20759	4.33045	4.33045	5.16556
URIAAL_R15325	4.33045	4.66746	5.4519	5.00267	5.25958	5.30481
URIAAL_R06094	8.55185	8.7656	9.53156	9.74501	8.80162	8.2686
URIAAL_R06095	15.4021	14.9807	14.7983	15.9657	16.3012	14.5744
URIAAL_R09068	6.0068	6.04647	6.70778	6.63732	7.15955	6.55431
URIAAL_R14821	12.9417	12.5824	12.449	12.6066	12.7762	13.1095
URIAAL_R09051	12.3109	12.7747	12.6866	11.8417	12.1882	12.9018
URIAAL_R09042	5.14018	5.32403	5.05022	5.51938	5.09334	5.6554
URIAAL_R06122	9.2473	8.94772	8.06111	9.87887	9.03632	9.16086
URIAAL_R06121	7.19963	6.7874	5.48686	8.16376	7.30926	6.55431
URIAAL_R06099	4.33045	4.33045	4.33045	5.37969	4.33045	4.75236
URIAAL_R06120	5.89364	5.42433	5.58474	7.08982	5.96709	6.48269
URIAAL_R06119	4.33045	4.33045	4.33045	5.00267	4.33045	4.92503
URIAAL_R09067	4.33045	4.91156	4.74887	4.33045	4.7743	5.4243
URIAAL_R06096	10.2026	10.3485	10.2627	10.5834	11.3552	10.2881
URIAAL_R06101	4.33045	4.33045	4.33045	4.33045	4.33045	4.33045
URIAAL_R09033	6.11008	5.26918	5.29699	6.37819	6.96918	5.26101
URIAAL_R09034	11.7812	11.384	11.6122	11.598	11.2362	11.6843
URIAAL_R06097	10.1051	9.95195	10.145	10.4197	10.42	10.4144
URIAAL_R14823	6.50925	5.90577	7.20368	6.02586	6.38136	6.68684
URIAAL_R09066	14.0355	13.4699	13.4461	12.7174	12.7569	13.4594
URIAAL_R06131	8.20337	7.76912	8.41229	7.9715	8.14731	8.09573
URIAAL_R13763	4.33045	4.33045	4.33045	4.33045	4.33045	4.33045
URIAAL_R13768	4.33045	4.33045	4.33045	5.27289	4.33045	4.75236
URIAAL_R13706	5.20321	5.14689	4.74887	6.35754	5.47885	5.49607
URIAAL_R13725	6.39616	7.20731	7.06058	7.93237	6.27091	7.26404
URIAAL_R14688	4.33045	4.33045	4.33045	4.33045	4.33045	4.33045
URIAAL_R06172	6.27215	6.64615	6.03547	8.93908	5.77984	7.49955
URIAAL_R13724	12.0538	12.2094	11.3952	11.9096	12.5532	11.888
URIAAL_R13723	4.99443	4.33045	4.98862	5.64151	5.68884	5.6554
URIAAL_R13722	5.46148	5.26918	4.92014	4.33045	4.95573	5.05614
URIAAL_R06171	5.69947	4.80598	4.74887	4.33045	5.02819	4.33045
URIAAL_R06154	5.14018	4.80598	4.92014	5.56176	4.33045	4.62931
URIAAL_R06166	4.33045	4.80598	4.33045	4.33045	4.33045	4.33045
URIAAL_R06205	5.86354	6.3504	6.27848	5.08036	4.64492	6.14813
URIAAL_R13767	5.54724	5.51478	5.10659	5.27289	5.99152	5.46087
URIAAL_R06170	10.1051	9.71114	9.40843	11.7851	11.5376	9.98667
URIAAL_R06153	8.66436	9.74863	10.699	7.42037	7.4036	9.32399
URIAAL_R06163	11.0273	11.7987	12.2895	10.557	10.5687	11.492
URIAAL_R06152	12.6574	13.4092	13.4538	11.113	11.1966	13.2268
URIAAL_R06169	11.1529	11.9555	11.3246	10.2653	10.0641	10.5067
URIAAL_R06151	12.4059	12.3984	12.4762	12.0048	12.4816	11.8482
URIAAL_R06208	11.5643	11.1351	10.6721	10.8499	10.3314	10.7663
URIAAL_R06207	9.08085	9.18793	9.46523	8.76531	8.96041	9.08683
URIAAL_R06150	6.82858	5.74539	7.03202	5.85003	6.06192	6.37531
URIAAL_R06203	10.9054	11.0854	11.473	9.78739	10.88	10.6752
URIAAL_R06149	8.64098	9.10935	8.32263	9.06441	8.77019	9.17392
URIAAL_R13721	9.38716	10.1886	9.74155	9.04629	9.30091	9.91465
URIAAL_R13770	4.90672	5.90577	5.92723	4.66883	5.15292	6.16715
URIAAL_R13764	4.802	5.74539	5.25352	4.33045	5.30804	5.38622
URIAAL_R13720	7.19963	8.36215	7.37159	6.6705	7.07817	7.97098
URIAAL_R06168	11.0911	11.2726	11.821	11.4562	10.8184	11.539
URIAAL_R13719	5.50531	5.32403	5.33833	5.91165	5.39747	5.84429
URIAAL_R13718	4.33045	4.33045	4.33045	4.33045	4.33045	4.33045
URIAAL_R06167	4.99443	4.80598	4.92014	5.00267	4.33045	4.33045
URIAAL_R13717	13.5799	13.4868	14.1742	12.591	13.1059	13.4542
URIAAL_R06147	12.8436	12.9876	13.6492	12.2632	12.4271	12.6417
URIAAL_R13715	8.90899	9.07135	9.75442	7.64783	8.95483	8.63004
URIAAL_R13714	4.33045	4.99998	5.1588	5.47508	4.873	4.92503
URIAAL_R06161	4.802	4.66746	4.33045	5.15015	4.33045	4.33045
URIAAL_R13713	4.802	5.21042	4.84202	4.80791	5.09334	4.33045
URIAAL_R06148	8.23501	8.17027	7.40877	7.05322	8.56928	7.79506
URIAAL_R06173	10.7414	10.9407	10.8828	9.6994	10.4755	10.8031
URIAAL_R13704	11.9685	12.032	12.7814	11.36	11.6654	12.2151
URIAAL_R06174	10.8454	9.88282	10.2687	10.9045	10.9523	10.2455
URIAAL_R13771	4.33045	4.33045	4.33045	4.66883	4.64492	4.33045
URIAAL_R14687	9.30785	10.3139	9.27378	10.319	9.94551	10.3885
URIAAL_R06165	5.69947	5.42433	5.58474	6.62041	5.86389	5.6554
URIAAL_R13705	5.14018	5.26918	5.33833	5.15015	4.7743	5.26101
URIAAL_R06175	5.36713	6.24211	5.67397	6.27143	5.25958	5.49607
URIAAL_R06176	4.33045	4.33045	4.33045	4.33045	4.33045	4.33045
URIAAL_R13712	4.33045	4.33045	4.33045	5.00267	4.33045	4.33045
URIAAL_R13726	5.62616	5.14689	4.33045	6.62041	4.7743	5.26101
URIAAL_R06177	5.89364	6.17234	4.92014	8.29268	5.35389	5.59465
URIAAL_R13727	4.33045	4.33045	4.33045	5.56176	5.39747	4.33045
URIAAL_R13728	4.33045	4.33045	4.33045	4.33045	4.33045	4.33045
URIAAL_R13729	7.35349	8.1923	7.50105	7.2807	7.52281	8.17612
URIAAL_R13730	5.62616	5.26918	5.05022	5.27289	4.95573	4.99405
URIAAL_R13731	4.33045	4.80598	4.33045	4.91391	4.33045	4.33045
URIAAL_R13732	4.802	4.33045	4.33045	4.33045	4.7743	4.75236
URIAAL_R06138	4.33045	4.80598	4.33045	5.37969	4.33045	4.33045
URIAAL_R06178	5.31595	4.66746	4.74887	5.21391	4.95573	4.75236
URIAAL_R06179	4.33045	4.33045	4.33045	4.33045	4.33045	4.33045
URIAAL_R13733	5.69947	5.74539	5.10659	5.08036	6.12843	6.14813
URIAAL_R13734	5.20321	5.71031	4.74887	5.27289	5.77984	5.7673
URIAAL_R13735	5.66346	5.84434	5.10659	4.33045	5.6567	5.9394
URIAAL_R06139	5.41552	5.14689	5.48686	4.33045	5.09334	4.75236
URIAAL_R06162	5.26152	4.33045	4.92014	4.33045	4.95573	4.33045
URIAAL_R06180	14.3362	14.4295	14.7054	13.912	14.2968	14.212
URIAAL_R13765	4.33045	4.33045	4.33045	4.33045	4.33045	4.33045
URIAAL_R13736	4.66463	4.33045	4.33045	4.80791	4.33045	4.33045
URIAAL_R13737	4.33045	4.33045	4.33045	5.37969	4.33045	4.33045
URIAAL_R13761	4.33045	4.33045	4.33045	4.33045	4.33045	4.33045
URIAAL_R06140	4.99443	4.33045	4.33045	4.66883	4.33045	5.26101
URIAAL_R13738	4.33045	4.33045	4.33045	4.80791	4.33045	4.33045
URIAAL_R15305	5.86354	5.14689	5.20759	5.71557	5.02819	5.46087
URIAAL_R06141	9.37306	9.25984	9.00817	9.5575	9.57063	9.50707
URIAAL_R13769	6.41571	6.67885	6.48204	6.27143	6.19151	6.52613
URIAAL_R06142	5.86354	5.87547	5.05022	5.67919	6.06192	6.35921
URIAAL_R13739	5.31595	5.21042	5.33833	4.91391	6.06192	4.92503
URIAAL_R13740	15.6436	14.8012	14.4518	16.7265	16.2399	14.83
URIAAL_R06143	12.6559	12.292	12.1217	12.4172	12.8759	11.8435
URIAAL_R13741	12.3844	12.4428	12.4893	10.4647	10.9098	11.9785
URIAAL_R13702	5.89364	5.84434	5.75623	4.80791	5.30804	5.38622
URIAAL_R06181	4.33045	4.33045	4.33045	4.33045	4.33045	4.33045
URIAAL_R06182	4.33045	5.14689	4.33045	4.33045	4.33045	4.33045
URIAAL_R06204	4.33045	4.33045	4.33045	5.00267	4.33045	5.16556
URIAAL_R13703	4.33045	5.26918	5.58474	4.33045	5.51706	5.34646
URIAAL_R13711	5.14018	6.07271	6.79066	5.97014	5.62354	5.62547
URIAAL_R06183	9.65132	9.84525	11.2346	8.07685	7.74121	9.22081
URIAAL_R06184	13.2401	13.5201	14.0648	13.0091	13.1916	13.1081
URIAAL_R06144	4.33045	4.33045	4.33045	5.15015	5.35389	4.33045
URIAAL_R13742	7.73407	7.08107	7.00285	6.22607	7.42827	7.27229
URIAAL_R06186	9.81665	8.91508	9.15791	9.07636	9.49392	10.0506
URIAAL_R15611	12.81	10.813	11.3014	10.3996	9.65381	10.4317
URIAAL_R06187	12.6759	10.5978	11.1022	10.5149	9.5688	10.3969
URIAAL_R06145	11.2009	10.7571	11.0763	10.7238	10.0141	10.5681
URIAAL_R13743	5.92298	6.39127	6.20867	6.68679	7.31811	6.24043
URIAAL_R06210	4.33045	4.33045	4.33045	4.33045	4.95573	4.33045
URIAAL_R06188	4.33045	4.33045	4.74887	6.02586	4.33045	4.33045
URIAAL_R13766	5.95159	6.07271	5.67397	5.67919	5.55383	5.30481
URIAAL_R06146	8.88598	8.40988	7.87337	8.38709	9.08563	8.78861
URIAAL_R06164	5.50531	5.21042	4.74887	4.66883	5.15292	5.05614
URIAAL_R06189	10.9684	11.3405	11.2089	10.1372	10.7976	11.0688
URIAAL_R13744	8.54766	8.89847	8.40866	8.61348	9.17708	8.83048
URIAAL_R06190	5.73431	6.90163	5.3778	6.33656	5.91664	5.59465
URIAAL_R13745	6.8143	6.04647	6.67064	6.79557	7.0028	6.5819
URIAAL_R06191	13.5041	13.317	13.767	13.7226	14.5084	13.3094
URIAAL_R13746	4.33045	4.33045	4.62683	4.33045	4.95573	4.84627
URIAAL_R06192	9.68594	10.5295	10.4414	9.77462	10.6877	9.9416
URIAAL_R06155	6.78527	6.28655	6.05598	7.63158	7.0356	6.08923
URIAAL_R06193	16.4364	15.5571	15.2018	15.1942	15.2438	15.696
URIAAL_R13759	8.77944	9.28304	9.02717	7.83666	8.7413	8.84689
URIAAL_R13747	5.89364	5.81233	8.67612	5.97014	5.47885	5.68449
URIAAL_R13707	9.27537	7.96787	7.27005	8.02824	8.99886	8.68892
URIAAL_R06194	4.33045	5.71031	4.74887	5.47508	4.33045	5.05614
URIAAL_R13748	4.33045	4.33045	4.33045	5.91165	4.33045	4.33045
URIAAL_R13749	5.46148	5.42433	5.33833	5.15015	4.7743	5.4243
URIAAL_R06195	11.3911	11.5765	11.375	10.8784	11.2908	11.3276
URIAAL_R06156	11.0665	11.5439	11.2921	9.37612	9.99386	11.1141
URIAAL_R13750	4.802	4.80598	4.33045	4.33045	4.64492	4.99405
URIAAL_R13708	4.33045	4.33045	4.33045	4.33045	4.33045	4.33045
URIAAL_R13709	4.99443	4.33045	4.74887	4.33045	5.35389	5.38622
URIAAL_R06196	8.7323	8.81952	8.62397	7.16022	7.91893	8.81666
URIAAL_R06197	11.7204	10.5906	10.1569	12.4367	11.5671	11.0787
URIAAL_R13751	11.8574	11.6467	11.8968	11.9487	12.2534	11.6748
URIAAL_R06198	11.1118	10.8896	9.8048	11.0793	11.6314	11.1711
URIAAL_R06199	7.26323	6.41122	6.43784	5.88125	6.56213	6.88582
URIAAL_R13716	12.0926	12.1297	11.9931	11.943	12.6627	11.7493
URIAAL_R13752	11.5435	11.6412	11.4543	11.6232	12.2523	11.122
URIAAL_R13753	7.11004	7.09303	7.41608	6.55054	6.45004	6.89666
URIAAL_R06206	7.52685	7.86166	8.39407	7.42037	7.31811	7.84524
URIAAL_R06212	7.49209	7.99323	8.88596	7.05322	7.58977	7.96595
URIAAL_R06202	7.16671	8.10787	8.44096	6.31522	7.41187	7.66438
URIAAL_R06200	11.3503	11.3113	11.2965	10.5623	11.0755	10.7905
URIAAL_R06157	10.497	11.0187	10.9035	10.1528	10.5814	10.808
URIAAL_R06158	11.1875	11.2899	11.8419	11.3211	11.3493	11.4929
URIAAL_R13754	5.20321	5.14689	5.83272	5.99833	5.75035	5.86882
URIAAL_R13755	4.99443	5.26918	5.25352	5.00267	4.33045	5.46087
URIAAL_R13760	7.17777	7.08107	7.36404	7.52112	7.67438	7.01056
URIAAL_R13756	7.45645	6.75727	7.54168	8.05275	8.34843	6.94961
URIAAL_R13762	8.05162	8.76925	7.84671	7.56463	7.38692	8.49063
URIAAL_R06211	8.08097	6.85991	6.83583	7.49435	7.83591	7.80073
URIAAL_R06209	8.87267	7.94205	7.93537	8.63791	8.85053	8.53525
URIAAL_R06159	12.1659	11.9695	11.557	12.4239	12.7725	11.7723
URIAAL_R13757	10.0807	8.36215	8.39039	8.80179	10.2609	9.41661
URIAAL_R13710	9.75096	8.92495	8.41951	10.1958	10.419	9.62898
URIAAL_R06201	7.63425	8.03044	7.43061	8.68946	6.72104	7.04005
URIAAL_R13758	4.33045	5.6365	4.33045	4.80791	4.95573	4.62931
URIAAL_R06160	4.33045	4.33045	5.05022	5.15015	4.95573	4.33045
URIAAL_R00744	9.02781	9.87437	10.2466	10.5708	9.54489	9.23334
URIAAL_R00766	5.76806	4.80598	4.33045	6.63732	5.55383	4.33045
URIAAL_R12694	4.33045	4.33045	4.33045	4.33045	4.33045	4.33045
URIAAL_R12693	5.8008	6.92875	6.79066	7.41084	6.78746	7.1875
URIAAL_R00745	10.2964	10.5498	10.4711	10.4173	10.6145	10.8694
URIAAL_R12692	4.99443	5.32403	5.67397	5.56176	6.06192	5.71281
URIAAL_R12670	8.44784	8.94449	8.04247	8.40145	8.6613	9.01121
URIAAL_R12691	10.2599	9.99937	9.27577	10.0968	9.71278	10.0553
URIAAL_R00776	4.33045	4.33045	4.33045	4.33045	4.33045	4.33045
URIAAL_R12671	4.33045	4.33045	4.33045	5.56176	4.33045	4.33045
URIAAL_R12672	4.802	4.33045	4.33045	5.71557	4.64492	4.33045
URIAAL_R00746	6.79986	6.64615	6.70778	7.51225	6.72104	6.94961
URIAAL_R00775	6.25025	6.67885	7.27005	6.60328	7.10925	6.78414
URIAAL_R00747	9.98207	10.1058	10.6301	10.6687	10.1592	10.047
URIAAL_R00748	9.23695	9.34067	9.20871	8.55053	8.35269	9.52246
URIAAL_R00777	4.802	4.80598	4.92014	5.32794	4.7743	5.26101
URIAAL_R00749	11.1989	10.4813	9.91209	11.3558	13.2921	11.2096
URIAAL_R12680	9.40574	9.40785	9.14275	9.01868	9.82088	10.0075
URIAAL_R12690	6.11008	6.90163	6.24406	5.91165	6.81314	7.16991
URIAAL_R12689	8.63705	8.85093	8.89634	9.03102	9.00157	9.01121
URIAAL_R00765	7.52685	8.07858	7.96043	7.46706	7.96985	8.57194
URIAAL_R00750	6.11008	5.74539	4.74887	5.08036	4.7743	5.7404
URIAAL_R00751	11.8932	11.862	12.315	12.1833	12.2455	11.9945
URIAAL_R00774	9.96808	9.69778	9.60607	9.04629	9.40678	9.93139
URIAAL_R00752	9.66296	10.0102	10.2826	9.0402	9.31185	10.0232
URIAAL_R00773	5.86354	6.30819	6.75576	6.8251	5.77984	6.79582
URIAAL_R12688	9.74185	9.37944	9.68589	10.085	9.75187	9.7443
URIAAL_R00753	10.0293	10.0942	10.352	10.171	10.2347	10.1497
URIAAL_R12673	5.73431	5.6365	6.31198	6.65401	7.18887	5.81922
URIAAL_R00772	11.3389	11.7268	12.1953	11.6494	11.0092	11.5787
URIAAL_R12674	4.33045	4.99998	5.10659	5.00267	4.33045	4.75236
URIAAL_R12675	6.84271	6.92875	6.96297	6.53247	6.63672	7.1875
URIAAL_R12676	10.6412	10.4395	10.7662	11.0719	11.4121	10.2132
URIAAL_R12695	10.7249	10.147	10.1676	9.14322	10.2677	9.53432
URIAAL_R00763	7.95978	7.13988	7.15173	7.02827	7.65369	6.8074
URIAAL_R00754	10.1825	10.2196	10.7333	10.1084	9.69618	10.3382
URIAAL_R00767	6.7556	7.32303	7.29415	7.2807	7.18887	6.88582
URIAAL_R12682	4.33045	4.80598	5.10659	4.33045	4.95573	5.56286
URIAAL_R00759	7.06297	7.25051	6.36064	7.52112	6.89938	8.02991
URIAAL_R12678	6.96372	7.23983	6.75576	7.89892	7.6114	8.46602
URIAAL_R00758	4.33045	4.33045	4.33045	4.33045	5.39747	4.33045
URIAAL_R00768	6.0068	5.6365	5.55318	5.94126	5.96709	6.00594
URIAAL_R15326	4.33045	4.33045	4.33045	4.33045	4.33045	4.33045
URIAAL_R12683	8.05754	8.03654	7.22894	6.35754	7.69476	7.74892
URIAAL_R00757	8.90899	8.88505	9.16221	8.58863	9.50921	9.1804
URIAAL_R12679	4.99443	5.37559	5.33833	4.33045	5.15292	5.05614
URIAAL_R12681	4.33045	4.33045	4.74887	4.33045	4.33045	4.33045
URIAAL_R12696	4.802	4.33045	4.74887	4.80791	4.33045	4.84627
URIAAL_R12684	5.76806	5.81233	5.61535	4.80791	5.43905	5.38622
URIAAL_R12685	6.59655	6.26452	6.26139	4.33045	5.89057	6.62223
URIAAL_R12677	10.8437	10.956	10.9415	11.4033	11.4883	11.2645
URIAAL_R00781	7.26323	7.88897	7.30209	8.25099	8.20503	7.65814
URIAAL_R00780	9.99593	10.0317	10.3548	9.22601	10.1592	9.84972
URIAAL_R00769	10.9103	10.1526	10.006	10.9875	11.2825	10.5075
URIAAL_R00779	6.39616	5.9353	7.27005	5.71557	5.68884	6.22251
URIAAL_R00770	9.46232	8.84054	8.73514	8.52455	9.63825	9.65249
URIAAL_R00756	14.18	14.1217	14.9992	13.291	14.9275	14.5825
URIAAL_R12686	11.5064	11.5571	11.9045	10.2176	11.9982	11.4344
URIAAL_R00764	8.90245	8.12516	9.20246	6.41852	9.39859	8.18909
URIAAL_R00782	6.33566	4.33045	6.51069	4.66883	6.87529	5.05614
URIAAL_R00760	5.83261	4.33045	5.3778	4.33045	5.09334	4.33045
URIAAL_R00755	4.33045	4.33045	4.33045	4.33045	4.33045	4.33045
URIAAL_R12687	4.33045	4.33045	4.33045	4.33045	4.64492	4.33045
URIAAL_R00771	4.33045	4.33045	4.74887	4.33045	4.33045	4.33045
URIAAL_R00778	5.46148	6.67885	5.92723	5.47508	6.0845	6.60892
URIAAL_R00761	5.14018	4.91156	4.92014	5.51938	4.95573	4.33045
URIAAL_R00762	4.33045	4.33045	4.92014	5.71557	4.33045	4.33045
URIAAL_R08052	4.33045	4.33045	4.33045	4.33045	4.33045	4.33045
URIAAL_R08051	7.32404	7.91576	6.83583	9.47193	6.3636	7.52038
URIAAL_R03764	4.66463	4.66746	4.62683	4.33045	4.33045	4.75236
URIAAL_R03763	12.8472	12.5422	12.2169	11.8365	12.7234	12.3222
URIAAL_R14626	4.33045	5.67405	4.62683	4.80791	4.7743	4.75236
URIAAL_R03783	4.33045	4.33045	4.33045	5.42861	4.33045	4.33045
URIAAL_R03782	4.33045	4.66746	4.33045	5.08036	4.7743	4.92503
URIAAL_R08071	9.90582	9.81021	9.19618	10.436	9.14561	10.5482
URIAAL_R08070	7.71165	7.79101	8.36816	6.15477	6.98048	8.00565
URIAAL_R03786	9.56716	9.5162	9.82528	8.92593	9.57608	9.29241
URIAAL_R03781	8.32103	8.15912	8.12891	6.8251	6.88739	8.5487
URIAAL_R08064	7.46544	8.41457	7.58117	7.19413	6.29	8.02026
URIAAL_R03765	10.4249	10.8694	10.8365	9.98561	9.81166	10.5373
URIAAL_R03788	8.64882	8.75825	8.52371	8.10055	8.69518	8.78293
URIAAL_R03780	4.90672	4.33045	5.25352	8.31308	5.20807	4.92503
URIAAL_R03779	4.802	4.33045	4.74887	4.91391	4.7743	4.33045
URIAAL_R08069	5.26152	4.80598	4.33045	4.33045	4.33045	4.33045
URIAAL_R08068	6.18215	5.81233	5.3778	5.97014	5.62354	5.68449
URIAAL_R15130	6.78527	6.45023	5.52058	6.39851	6.45004	6.71183
URIAAL_R08067	6.15859	6.32947	6.0146	6.8251	6.39888	6.46789
URIAAL_R08066	12.5877	12.2314	12.2205	11.2063	11.8841	12.1492
URIAAL_R03762	9.56922	9.81021	9.69631	9.18245	9.72265	9.53769
URIAAL_R08050	5.73431	6.04647	6.24406	5.91165	6.92305	6.16715
URIAAL_R08065	5.95159	5.99219	6.48204	5.78484	6.89938	6.35921
URIAAL_R03787	8.74697	8.04263	7.94042	9.15172	8.81092	8.01054
URIAAL_R03761	6.79986	6.371	6.22649	6.33656	7.42827	6.29271
URIAAL_R03778	6.96372	6.39127	6.63242	6.6705	7.48418	7.04005
URIAAL_R08077	7.22115	7.13988	6.91143	7.35228	7.87803	6.67416
URIAAL_R03777	5.73431	5.6365	5.85709	5.08036	5.39747	5.53004
URIAAL_R03784	4.33045	4.33045	4.33045	4.33045	4.33045	4.33045
URIAAL_R08063	4.33045	4.99998	4.33045	5.15015	4.7743	4.92503
URIAAL_R08074	4.802	4.33045	4.33045	5.91165	4.33045	4.33045
URIAAL_R03760	5.36713	5.59753	5.10659	6.85401	5.20807	5.86882
URIAAL_R08054	9.10096	9.27791	9.59497	9.40956	9.90274	9.13437
URIAAL_R03776	8.82854	9.08021	9.06444	9.32697	8.92375	8.97932
URIAAL_R08062	4.99443	4.33045	4.98862	5.64151	4.7743	5.30481
URIAAL_R15129	8.42974	8.57383	8.74379	9.84437	9.44704	8.6489
URIAAL_R08061	7.31409	8.11942	7.38658	7.73403	7.22704	7.33658
URIAAL_R03759	7.41058	7.35299	7.43781	7.59011	7.46843	7.00059
URIAAL_R03758	8.74332	8.99845	9.77141	9.19346	9.45496	8.58832
URIAAL_R08060	8.02771	8.77654	8.75524	8.20258	8.39045	8.1674
URIAAL_R03757	8.77944	9.36261	9.36431	8.23503	8.16681	8.28479
URIAAL_R08055	4.33045	4.80598	4.33045	5.71557	4.33045	4.33045
URIAAL_R03775	4.802	5.77936	5.10659	6.79557	5.09334	5.98418
URIAAL_R08072	6.56232	6.67885	6.34462	7.06553	5.91664	7.27229
URIAAL_R08073	6.67845	6.98142	6.56619	7.30153	6.46665	7.44972
URIAAL_R03785	7.53541	7.45768	7.76361	7.72641	7.93041	7.71931
URIAAL_R03768	7.85481	7.88219	8.40866	8.16376	8.30074	8.27266
URIAAL_R03756	14.0289	13.6802	13.4833	13.6223	13.7378	13.2585
URIAAL_R08049	5.36713	6.14818	6.07615	6.6705	5.91664	5.9394
URIAAL_R03766	10.0501	10.3929	10.8743	10.974	9.63651	10.1027
URIAAL_R03755	8.64098	8.31278	8.38302	9.68972	9.51679	8.8222
URIAAL_R08048	4.33045	5.26918	4.33045	6.60328	4.873	5.05614
URIAAL_R03769	5.8008	6.07271	4.98862	6.41852	5.55383	5.16556
URIAAL_R03767	6.15859	7.28205	7.02236	7.93897	6.66542	7.85615
URIAAL_R03770	9.25757	9.61696	9.46871	10.5855	9.77735	9.51735
URIAAL_R08053	10.6978	10.6728	11.055	10.8174	10.6399	10.9887
URIAAL_R08047	11.4488	11.3201	11.7737	12.3962	12.2597	11.3149
URIAAL_R08059	8.41602	7.88219	8.48293	9.59742	8.90072	8.31269
URIAAL_R03774	11.2935	11.2122	11.3902	11.2887	11.4994	11.0873
URIAAL_R08058	6.89782	6.371	6.92189	7.43923	7.53041	7.65814
URIAAL_R08075	10.1919	9.92109	10.1064	10.6458	9.88381	10.6505
URIAAL_R08057	8.47896	8.46965	9.32648	8.02205	7.17917	8.84417
URIAAL_R03773	4.66463	4.33045	4.84202	4.33045	4.7743	4.84627
URIAAL_R03772	4.33045	4.80598	5.3778	4.80791	4.7743	4.75236
URIAAL_R08056	8.09254	7.55511	6.93228	9.11453	7.70149	7.56113
URIAAL_R03771	6.33566	6.57823	5.92723	5.78484	4.873	6.83027
URIAAL_R08076	7.25283	6.64615	6.42276	7.39159	7.20809	7.80073
URIAAL_R15128	12.7106	12.7435	11.5143	10.9859	11.7981	12.6726
URIAAL_R10785	4.33045	4.33045	4.33045	5.27289	4.33045	4.33045
URIAAL_R14152	11.5843	12.4539	12.5623	10.1696	10.5448	12.1533
URIAAL_R10779	11.3575	11.1631	11.156	10.0657	10.8092	11.063
URIAAL_R10788	4.33045	4.33045	4.74887	4.80791	5.09334	5.26101
URIAAL_R10781	4.33045	4.33045	4.33045	4.80791	4.33045	4.33045
URIAAL_R10786	4.66463	4.33045	4.33045	4.33045	4.33045	4.33045
URIAAL_R10789	4.802	4.33045	4.33045	4.33045	4.33045	4.33045
URIAAL_R10780	4.99443	4.33045	4.33045	5.00267	4.7743	4.33045
URIAAL_R10782	5.58747	5.26918	4.92014	5.15015	5.62354	4.92503
URIAAL_R10790	10.7784	10.6845	8.24338	9.54896	10.4159	10.1639
URIAAL_R14163	17.0065	17.032	17.0417	15.5996	17.9085	16.0384
URIAAL_R14153	7.28379	6.01964	5.58474	7.99066	6.3456	7.27229
URIAAL_R14154	4.33045	4.33045	4.33045	5.37969	4.33045	4.33045
URIAAL_R14162	4.33045	4.33045	4.33045	5.21391	4.64492	4.62931
URIAAL_R10791	4.33045	4.33045	4.33045	4.80791	4.33045	4.33045
URIAAL_R10806	4.33045	4.33045	4.33045	4.33045	4.33045	4.33045
URIAAL_R10792	9.53376	8.24066	8.48981	10.8715	9.55044	8.7249
URIAAL_R14155	4.99443	5.59753	5.55318	5.67919	5.83657	4.92503
URIAAL_R14156	4.33045	4.33045	4.33045	5.27289	4.33045	4.33045
URIAAL_R10793	11.0408	11.0248	9.69037	10.231	10.9862	10.9664
URIAAL_R10794	4.33045	4.33045	4.74887	5.42861	4.33045	4.33045
URIAAL_R10787	8.25572	8.367	8.73803	7.82957	8.46704	8.59157
URIAAL_R14157	11.4279	10.3977	10.9514	11.7319	11.0864	11.0137
URIAAL_R10795	10.2839	10.1	10.6759	9.19894	9.8984	9.84429
URIAAL_R10805	5.73431	5.90577	5.75623	5.56176	6.51526	6.06894
URIAAL_R14158	5.58747	6.30819	6.36064	6.15477	6.94631	7.32078
URIAAL_R10796	12.3876	12.065	12.1036	11.0992	11.656	11.2996
URIAAL_R14164	5.26152	4.33045	5.83272	5.64151	5.20807	4.92503
URIAAL_R14151	5.26152	4.99998	5.10659	5.64151	4.33045	4.75236
URIAAL_R14159	11.6728	11.3545	11.594	10.9137	11.8794	11.0873
URIAAL_R10783	12.0955	11.7202	12.1774	11.5897	12.0494	11.6559
URIAAL_R10784	5.58747	6.45023	6.87954	6.55054	6.49926	6.30966
URIAAL_R14160	5.46148	5.37559	5.29699	5.15015	4.64492	4.92503
URIAAL_R14174	4.33045	4.33045	4.33045	4.33045	4.33045	4.33045
URIAAL_R14170	4.33045	4.33045	4.33045	4.33045	4.33045	4.33045
URIAAL_R10797	4.33045	4.33045	4.33045	4.33045	4.33045	4.33045
URIAAL_R10798	4.33045	4.33045	4.74887	5.15015	4.95573	4.33045
URIAAL_R10799	6.27215	6.21928	6.61944	5.99833	6.67954	6.35921
URIAAL_R14172	9.7216	9.70734	10.1972	10.1401	9.91571	9.59865
URIAAL_R14171	10.6085	10.4757	11.2326	10.4816	10.6826	10.4727
URIAAL_R14165	5.50531	6.24211	6.74393	8.24037	6.87529	6.97023
URIAAL_R10800	6.93774	6.19603	6.99299	6.6705	6.51526	7.20488
URIAAL_R14166	8.55602	7.97425	7.90471	7.42983	7.18887	7.93029
URIAAL_R15458	8.30622	7.5292	7.93031	7.01563	7.15955	7.78367
URIAAL_R14167	7.81336	7.29241	7.37159	7.52112	6.69352	7.01056
URIAAL_R15457	8.44784	7.62196	7.94042	6.70288	7.02475	7.6137
URIAAL_R14175	8.83884	8.23005	8.17666	7.74161	7.36151	8.4589
URIAAL_R14168	8.79364	8.13088	8.60511	7.87847	6.91126	8.40442
URIAAL_R10801	5.50531	5.6365	5.29699	5.56176	5.09334	5.62547
URIAAL_R14169	4.33045	4.33045	4.33045	4.33045	4.33045	4.33045
URIAAL_R10804	5.14018	5.77936	5.20759	4.33045	4.7743	4.62931
URIAAL_R10803	4.90672	5.67405	4.74887	4.33045	4.7743	4.75236
URIAAL_R14161	4.33045	4.33045	4.33045	4.91391	4.33045	4.33045
URIAAL_R14173	4.33045	4.33045	4.33045	4.33045	4.33045	4.33045
URIAAL_R10802	9.71603	9.95356	10.5347	9.00311	9.9427	9.90424
URIAAL_R10173	5.36713	5.90577	4.74887	5.37969	4.873	4.33045
URIAAL_R01435	4.33045	4.33045	4.33045	4.33045	4.33045	4.33045
URIAAL_R10174	4.90672	4.33045	4.33045	5.08036	4.64492	4.33045
URIAAL_R01355	9.32991	7.74687	8.51025	8.28754	9.5281	9.44201
URIAAL_R10175	8.20337	8.14224	8.83023	8.33818	8.60181	8.6395
URIAAL_R01321	11.255	11.6452	11.7691	10.3817	10.9662	11.184
URIAAL_R10135	4.33045	5.14689	4.33045	4.33045	4.95573	4.33045
URIAAL_R01346	4.33045	4.33045	4.33045	4.33045	4.7743	4.33045
URIAAL_R01356	11.2524	11.0385	11.2569	10.6558	10.7209	10.9258
URIAAL_R15384	7.34374	8.03654	6.86874	7.42037	6.70735	7.56113
URIAAL_R01357	9.39182	9.10356	9.27973	8.97784	9.03895	9.05188
URIAAL_R01350	5.36713	4.80598	5.55318	5.15015	5.20807	5.34646
URIAAL_R01320	9.97431	10.4187	10.3642	11.5291	11.2908	10.2184
URIAAL_R01358	5.66346	4.91156	5.7021	5.37969	5.47885	5.89283
URIAAL_R15283	4.33045	4.33045	4.33045	4.33045	4.33045	4.33045
URIAAL_R15278	4.33045	4.33045	4.33045	4.33045	4.33045	4.33045
URIAAL_R15282	4.33045	4.33045	4.33045	4.33045	4.33045	4.33045
URIAAL_R15280	4.33045	4.33045	4.33045	5.21391	4.64492	4.75236
URIAAL_R15277	4.33045	4.33045	4.33045	4.33045	4.33045	4.33045
URIAAL_R15281	4.33045	4.33045	4.33045	4.33045	4.33045	4.33045
URIAAL_R15276	4.33045	4.33045	4.33045	4.33045	4.33045	4.33045
URIAAL_R15279	4.33045	4.33045	4.74887	4.33045	4.33045	4.33045
URIAAL_R15291	4.33045	4.33045	4.33045	4.33045	4.33045	4.33045
URIAAL_R01359	4.33045	4.33045	4.33045	5.67919	4.33045	4.33045
URIAAL_R01360	4.33045	4.33045	4.33045	4.33045	4.33045	4.33045
URIAAL_R10176	5.14018	5.14689	4.92014	4.33045	5.25958	4.33045
URIAAL_R10249	6.29368	5.59753	5.29699	4.33045	5.62354	5.38622
URIAAL_R01361	11.2128	10.5782	11.6726	10.8192	11.5427	10.9807
URIAAL_R01439	5.14018	4.99998	5.52058	5.71557	5.58928	5.98418
URIAAL_R01362	4.33045	4.33045	4.33045	4.33045	4.33045	4.33045
URIAAL_R01363	4.33045	4.33045	4.33045	5.64151	4.33045	4.75236
URIAAL_R10177	4.33045	4.33045	4.33045	5.71557	4.33045	4.33045
URIAAL_R10178	9.44221	9.52919	9.23346	9.33942	10.3831	9.19115
URIAAL_R01364	6.47264	6.28655	6.17224	6.35754	6.43321	6.55431
URIAAL_R10254	4.33045	4.33045	4.33045	5.27289	4.33045	4.33045
URIAAL_R01365	4.33045	4.33045	4.33045	5.15015	4.33045	4.33045
URIAAL_R10134	4.33045	4.33045	4.33045	4.33045	4.33045	4.33045
URIAAL_R10248	4.33045	4.33045	4.33045	4.33045	4.33045	4.33045
URIAAL_R10179	4.33045	6.09839	5.1588	5.27289	4.7743	5.56286
URIAAL_R10133	5.66346	5.37559	5.88095	4.91391	5.75035	6.04831
URIAAL_R01366	4.802	4.99998	4.33045	5.15015	4.33045	4.33045
URIAAL_R01322	4.33045	4.33045	4.33045	4.80791	4.33045	4.33045
URIAAL_R10263	4.33045	4.33045	4.33045	4.33045	4.33045	4.33045
URIAAL_R10137	8.03372	8.49198	7.13398	9.14889	7.35293	8.78009
URIAAL_R01436	9.60986	9.39844	9.50641	7.82244	9.3442	9.42755
URIAAL_R01323	5.36713	5.26918	5.48686	4.91391	4.95573	4.92503
URIAAL_R10180	4.802	5.47063	4.74887	5.56176	4.7743	4.62931
URIAAL_R01367	4.33045	5.47063	5.75623	4.33045	5.30804	4.99405
URIAAL_R10138	10.0367	10.0912	9.85214	10.1286	10.4881	9.86991
URIAAL_R10181	5.66346	5.59753	5.4156	5.97014	5.09334	5.38622
URIAAL_R15284	4.33045	4.80598	4.33045	5.15015	4.33045	4.99405
URIAAL_R15293	4.99443	4.33045	4.74887	4.33045	4.33045	4.99405
URIAAL_R01368	7.18874	7.16272	7.40877	8.81255	7.4525	7.72528
URIAAL_R01324	9.90745	10.1386	10.4901	9.76359	10.4794	9.89245
URIAAL_R10139	4.33045	4.66746	4.33045	4.33045	4.33045	4.62931
URIAAL_R10182	4.33045	4.33045	4.33045	4.33045	4.33045	4.33045
URIAAL_R10170	4.33045	4.33045	4.62683	4.33045	4.95573	4.33045
URIAAL_R01354	5.8008	5.74539	6.26139	7.50333	6.57739	7.04005
URIAAL_R10265	4.33045	4.80598	4.33045	4.80791	4.33045	4.33045
URIAAL_R01325	7.36317	7.61378	8.36067	7.74161	7.82979	7.6137
URIAAL_R10183	10.774	10.716	11.1022	10.2574	10.5949	10.4171
URIAAL_R01440	4.802	4.80598	5.1588	4.33045	4.33045	4.75236
URIAAL_R01441	4.33045	5.26918	5.05022	5.37969	4.33045	4.33045
URIAAL_R15287	4.99443	4.33045	4.74887	4.33045	4.33045	4.33045
URIAAL_R01371	4.33045	4.33045	4.74887	4.80791	4.33045	4.33045
URIAAL_R01349	4.33045	4.33045	4.33045	4.80791	4.873	4.62931
URIAAL_R01369	4.33045	4.33045	4.33045	4.33045	4.64492	4.33045
URIAAL_R15286	4.33045	4.33045	4.33045	4.33045	4.33045	4.33045
URIAAL_R01370	4.33045	4.33045	4.33045	4.33045	4.33045	4.33045
URIAAL_R10140	13	11.6482	11.5611	12.2228	12.6757	10.7919
URIAAL_R10257	5.86354	5.14689	4.74887	5.97014	6.01545	5.30481
URIAAL_R10247	6.64629	5.77936	4.98862	5.91165	6.12843	5.91635
URIAAL_R10184	4.33045	4.33045	4.33045	4.33045	4.33045	4.92503
URIAAL_R10141	4.99443	5.37559	4.92014	5.08036	4.7743	4.33045
URIAAL_R01372	4.802	5.26918	4.33045	4.33045	4.33045	4.33045
URIAAL_R01373	12.7552	12.2703	12.3741	12.8318	12.9902	11.9604
URIAAL_R10164	5.83261	6.32947	5.88095	4.80791	6.12843	5.9394
URIAAL_R10142	4.66463	5.26918	5.61535	5.27289	4.33045	4.62931
URIAAL_R10185	11.8607	12.1616	12.3165	10.9062	10.8807	12.1194
URIAAL_R10143	6.33566	5.87547	5.25352	6.20276	5.75035	6.08923
URIAAL_R01394	4.33045	4.33045	4.33045	4.80791	4.7743	4.33045
URIAAL_R01374	7.11004	7.35299	6.40751	7.29115	6.3088	6.84156
URIAAL_R10258	9.30042	9.65103	9.43711	9.20983	9.96088	9.29041
URIAAL_R10171	7.95344	7.30269	7.34881	7.79358	8.42319	8.16303
URIAAL_R01447	6.49107	6.67885	5.92723	6.45762	5.83657	5.89283
URIAAL_R10186	4.33045	4.33045	4.33045	4.33045	4.33045	4.33045
URIAAL_R01437	4.33045	4.33045	4.33045	4.33045	4.64492	4.33045
URIAAL_R10187	9.896	9.92764	10.2273	9.07338	9.96643	9.77031
URIAAL_R01326	4.33045	4.33045	4.33045	5.27289	4.33045	4.33045
URIAAL_R01375	6.49107	7.48493	6.24406	6.24896	6.93473	6.79582
URIAAL_R01376	13.6336	13.865	14.1424	12.5161	13.3612	13.7213
URIAAL_R10188	4.33045	4.33045	4.33045	4.80791	4.33045	4.33045
URIAAL_R01327	4.99443	5.74539	6.09598	4.33045	5.43905	5.16556
URIAAL_R10144	11.5251	12.3623	12.5833	10.107	10.6826	12.0887
URIAAL_R01443	10.4675	10.7488	11.1528	10.5149	10.8022	10.95
URIAAL_R10145	4.33045	4.33045	4.33045	4.33045	4.95573	4.33045
URIAAL_R01445	8.66436	8.33768	8.83563	7.95857	10.0641	8.38203
URIAAL_R01328	14.0295	14.8676	14.9004	13.1215	13.5844	14.3142
URIAAL_R10189	4.33045	4.33045	4.33045	4.33045	4.33045	5.26101
URIAAL_R10146	5.95159	5.87547	6.24406	7.20525	5.47885	5.98418
URIAAL_R10190	9.72346	8.60694	8.5731	8.67379	9.38622	9.30828
URIAAL_R01431	5.26152	5.55702	5.55318	5.00267	5.15292	5.89283
URIAAL_R10241	5.69947	5.32403	5.72951	5.00267	5.72003	4.33045
URIAAL_R01329	9.51034	8.80177	8.24338	9.34189	8.94361	8.95934
URIAAL_R10246	5.41552	4.33045	4.33045	4.80791	4.33045	4.33045
URIAAL_R10245	9.05752	8.98594	9.32456	8.22968	8.57293	8.76
URIAAL_R01330	10.6105	9.67069	9.98428	11.5034	10.658	10.2424
URIAAL_R10191	8.43429	8.59048	8.85969	7.95207	7.93611	8.8083
URIAAL_R01377	11.089	11.3636	11.3611	9.88227	10.7851	10.9942
URIAAL_R10147	4.33045	4.33045	4.33045	4.80791	4.33045	4.33045
URIAAL_R01378	8.46126	7.94205	7.41608	8.24569	8.40281	8.55538
URIAAL_R10148	10.5719	9.70543	9.86802	11.7622	10.2654	10.5288
URIAAL_R10192	9.22392	9.22566	9.01056	9.0674	10.0141	9.84972
URIAAL_R01379	6.25025	4.80598	4.92014	7.50333	8.03504	5.91635
URIAAL_R10238	10.1318	9.94551	9.68589	9.61799	10.1011	9.9416
URIAAL_R01427	6.82858	6.50663	5.25352	7.59011	7.91316	6.48269
URIAAL_R10237	8.24021	7.88897	8.21041	7.59011	7.43639	8.31663
URIAAL_R01426	5.66346	5.47063	4.98862	5.37969	4.95573	5.49607
URIAAL_R10236	4.33045	4.33045	4.98862	5.08036	4.64492	4.33045
URIAAL_R10235	10.2471	10.3787	10.9773	10.4861	10.038	10.438
URIAAL_R01331	8.19266	8.67096	9.41024	8.15248	9.11593	9.56437
URIAAL_R01425	6.05955	6.07271	6.70778	5.00267	6.45004	6.10918
URIAAL_R10234	5.36713	5.26918	5.05022	4.33045	5.39747	5.26101
URIAAL_R10233	5.14018	5.26918	5.25352	5.47508	5.75035	5.05614
URIAAL_R10232	6.79986	6.4881	5.8078	6.73449	6.91126	6.20433
URIAAL_R01424	5.92298	6.6626	6.69551	5.75076	5.47885	6.92867
URIAAL_R10231	14.56	14.9113	15.3083	14.1639	14.9153	14.6803
URIAAL_R01423	12.9722	12.854	13.3018	12.6055	12.8953	12.759
URIAAL_R01422	10.0937	10.6571	11.4138	10.598	10.8299	10.3987
URIAAL_R10149	5.14018	5.26918	5.29699	5.27289	5.6567	4.84627
URIAAL_R10230	8.82163	9.86927	9.24161	8.75046	9.3031	9.50535
URIAAL_R10243	6.33566	7.79101	7.06058	7.08982	7.3785	7.65188
URIAAL_R10229	6.56232	6.67885	6.07615	5.56176	5.30804	5.05614
URIAAL_R10150	6.11008	7.174	5.83272	5.85003	5.55383	5.16556
URIAAL_R10262	5.58747	5.84434	5.33833	5.21391	4.64492	4.33045
URIAAL_R01332	5.14018	4.33045	4.33045	4.80791	4.64492	4.99405
URIAAL_R10151	8.37878	8.60284	8.85171	9.15735	9.90419	8.97186
URIAAL_R10152	5.97952	6.75727	5.78232	6.83963	6.65115	6.89666
URIAAL_R01421	6.69424	7.4299	6.64528	7.06553	7.60422	6.87489
URIAAL_R10228	6.8143	6.92875	6.84689	6.37819	6.51526	7.08784
URIAAL_R10212	6.95079	7.11665	7.53499	6.13006	7.22704	7.67059
URIAAL_R14739	4.66463	5.71031	5.25352	5.15015	4.64492	4.92503
URIAAL_R01448	6.31485	6.98142	7.18658	6.83963	6.27091	6.5819
URIAAL_R10227	11.3641	10.6542	11.1239	11.0531	11.2556	11.2022
URIAAL_R01420	12.2308	12.1484	12.8893	12.2742	12.4741	12.5877
URIAAL_R10153	6.45394	7.15135	6.94258	6.29352	6.39888	6.24043
URIAAL_R01333	4.33045	4.33045	4.33045	4.33045	4.33045	4.33045
URIAAL_R10226	4.33045	4.99998	4.33045	4.33045	4.7743	4.75236
URIAAL_R10154	9.18139	8.41924	8.15948	8.63791	9.38207	9.45633
URIAAL_R01334	4.33045	4.99998	4.33045	4.33045	4.7743	4.33045
URIAAL_R01335	5.41552	4.80598	5.64508	6.05277	4.64492	5.4243
URIAAL_R10155	10.1108	9.85902	9.14057	10.3427	7.88394	9.39447
URIAAL_R10225	5.73431	5.42433	5.05022	4.91391	5.39747	5.34646
URIAAL_R01336	12.2357	12.2394	12.5517	11.371	12.1777	12.0233
URIAAL_R01419	4.33045	4.33045	5.3778	5.27289	4.7743	4.62931
URIAAL_R01418	7.24235	6.04647	5.92723	5.78484	5.68884	6.48269
URIAAL_R01442	4.33045	4.33045	4.33045	4.33045	4.33045	4.33045
URIAAL_R01446	4.33045	4.33045	4.33045	4.33045	4.33045	4.33045
URIAAL_R01417	4.33045	4.33045	4.33045	5.56176	4.7743	4.33045
URIAAL_R01433	4.33045	4.33045	4.33045	4.33045	4.33045	4.33045
URIAAL_R01416	4.33045	4.33045	4.74887	4.80791	4.95573	4.33045
URIAAL_R01414	4.33045	4.33045	4.33045	4.33045	4.33045	4.33045
URIAAL_R01410	4.33045	4.33045	4.74887	4.33045	4.33045	4.33045
URIAAL_R01409	4.33045	4.33045	4.33045	4.33045	4.33045	4.33045
URIAAL_R01406	4.99443	4.33045	4.33045	4.33045	4.33045	4.33045
URIAAL_R01412	4.802	4.33045	4.33045	4.33045	4.33045	4.33045
URIAAL_R01408	4.33045	4.33045	4.62683	4.33045	4.33045	4.33045
URIAAL_R01411	4.33045	4.66746	4.33045	4.33045	4.7743	4.33045
URIAAL_R01407	4.33045	4.80598	4.74887	4.33045	4.33045	4.33045
URIAAL_R01413	4.802	4.33045	5.25352	4.91391	4.33045	4.33045
URIAAL_R01415	5.14018	4.33045	4.92014	4.33045	4.33045	4.33045
URIAAL_R10166	11.7878	11.5017	11.9651	9.83737	11.5616	11.3129
URIAAL_R01405	10.0456	10.2656	10.4083	9.34683	9.56332	10.268
URIAAL_R10224	6.62992	6.5249	7.34881	5.60241	6.23184	6.79582
URIAAL_R10223	4.33045	4.80598	4.33045	5.32794	4.33045	5.79356
URIAAL_R10253	7.14432	7.08107	6.52479	6.75002	7.09897	7.23899
URIAAL_R01344	4.33045	4.33045	4.33045	5.15015	4.33045	4.33045
URIAAL_R01404	4.33045	4.33045	4.62683	5.71557	4.7743	4.33045
URIAAL_R01337	9.49523	9.38422	9.42464	9.31693	9.40269	9.1674
URIAAL_R10244	7.50958	7.2611	7.61959	7.06553	7.65369	6.99054
URIAAL_R10255	7.25283	7.03214	7.12501	6.65401	7.06765	6.72416
URIAAL_R10261	7.50958	7.77645	7.58117	7.11369	7.66752	7.42043
URIAAL_R01403	16.3077	16.0346	16.6622	15.5348	16.9078	15.3913
URIAAL_R10169	10.9559	10.7037	10.9009	10.8852	11.1996	10.8219
URIAAL_R10156	7.99106	8.31278	8.36067	9.4353	8.76063	8.16303
URIAAL_R10222	4.802	4.99998	4.33045	4.33045	5.09334	4.33045
URIAAL_R10221	4.33045	4.33045	4.33045	4.33045	4.33045	4.33045
URIAAL_R10168	4.802	4.33045	4.74887	5.00267	4.64492	4.33045
URIAAL_R10167	4.66463	4.33045	4.33045	4.33045	5.20807	4.75236
URIAAL_R10157	4.33045	4.80598	4.33045	4.80791	4.33045	5.05614
URIAAL_R10158	4.33045	4.33045	4.33045	5.00267	4.33045	4.33045
URIAAL_R10264	4.33045	4.33045	4.33045	4.33045	4.33045	4.33045
URIAAL_R01347	4.33045	4.99998	4.33045	5.32794	4.95573	4.62931
URIAAL_R01338	9.38482	9.88955	9.93739	9.45144	9.54117	10.114
URIAAL_R01402	10.4385	9.91286	9.42642	11.1396	10.5139	10.1855
URIAAL_R01401	12.328	12.4909	12.7431	12.0226	12.5695	12.246
URIAAL_R01353	6.08508	6.21928	5.78232	4.66883	4.95573	4.75236
URIAAL_R01400	4.33045	4.33045	4.33045	6.51416	4.33045	4.33045
URIAAL_R01348	5.50531	5.74539	5.75623	6.41852	6.23184	6.18588
URIAAL_R01399	12.7694	12.3734	12.3449	12.2849	12.8752	12.3848
URIAAL_R15385	8.83542	8.367	8.49324	8.00958	8.69183	8.78293
URIAAL_R10260	9.73268	9.38897	9.8548	9.46513	9.64519	10.0063
URIAAL_R01345	11.6211	11.5202	11.8267	10.8058	11.3225	11.5427
URIAAL_R10193	4.66463	4.80598	4.74887	4.33045	5.02819	4.84627
URIAAL_R01430	7.52685	7.55511	7.92012	8.54192	8.95762	8.08188
URIAAL_R01339	14.0804	12.9224	13.1761	13.8167	14.7367	13.2894
URIAAL_R10163	5.54724	5.67405	5.72951	7.93897	5.43905	6.06894
URIAAL_R10219	11.6216	11.7929	11.9446	10.695	11.6565	11.8049
URIAAL_R10256	4.33045	4.33045	4.33045	4.33045	4.33045	4.33045
URIAAL_R10203	4.33045	4.33045	4.33045	4.33045	4.33045	4.33045
URIAAL_R01398	6.95079	6.371	6.36064	5.67919	6.748	6.73637
URIAAL_R10218	12.6104	12.3225	11.6726	12.3878	12.8394	11.8897
URIAAL_R10259	10.0157	9.22033	9.44243	9.76912	10.301	10.0901
URIAAL_R01397	4.66463	5.14689	4.33045	5.94126	4.7743	4.33045
URIAAL_R10217	4.33045	4.66746	5.25352	5.15015	4.7743	4.33045
URIAAL_R10216	7.23179	8.12516	7.32564	7.29115	7.06765	8.28881
URIAAL_R10215	11.679	11.0438	11.3587	9.86517	11.1259	10.7151
URIAAL_R01340	11.4319	11.1721	11.7193	10.3365	11.2333	10.7954
URIAAL_R10214	11.3237	11.0446	11.7524	11.0926	10.9537	11.0454
URIAAL_R10213	8.65661	8.50522	7.86277	9.30175	8.16196	9.01364
URIAAL_R10159	8.43429	8.98279	8.68214	8.74297	8.27852	8.88977
URIAAL_R01341	6.77052	6.72645	7.30209	6.22607	5.80857	6.88582
URIAAL_R01342	8.89589	9.13507	8.91941	8.26677	8.751	10.1219
URIAAL_R10211	10.8873	10.6621	10.8834	10.4983	10.1856	10.8748
URIAAL_R10242	8.24021	7.21823	7.55497	8.01583	8.12755	8.89767
URIAAL_R10220	4.33045	4.33045	4.33045	5.08036	5.09334	4.33045
URIAAL_R10160	5.26152	4.99998	4.33045	6.05277	5.15292	4.75236
URIAAL_R10161	12.8065	13.0504	13.3087	12.2415	12.8287	12.7431
URIAAL_R01396	12.4237	11.7579	11.6444	11.1995	11.4127	11.4937
URIAAL_R10210	11.5085	11.2688	11.2788	10.4601	10.8562	11.2264
URIAAL_R10209	6.05955	6.371	6.7675	5.08036	7.48418	5.7404
URIAAL_R10165	9.92204	9.9947	10.9533	8.93908	9.53185	10.0992
URIAAL_R01343	6.49107	6.17234	8.21457	6.31522	8.00824	7.77218
URIAAL_R10162	10.4158	11.0905	10.7137	9.55324	10.576	10.0658
URIAAL_R01395	8.31117	8.67876	9.29156	8.55053	7.02475	9.0281
URIAAL_R10208	6.41571	6.28655	6.34462	5.56176	5.39747	6.59548
URIAAL_R10207	6.96372	5.77936	6.1347	6.27143	6.73459	6.45291
URIAAL_R10206	4.90672	5.14689	4.98862	5.94126	4.64492	4.62931
URIAAL_R10201	4.33045	4.33045	4.33045	4.33045	4.33045	4.33045
URIAAL_R10136	4.33045	4.80598	4.92014	4.33045	4.7743	4.33045
URIAAL_R01386	13.1113	12.6805	12.613	12.3113	12.3028	12.3857
URIAAL_R01385	7.71916	7.18519	7.803	7.6955	8.536	8.04427
URIAAL_R10200	4.33045	4.33045	4.74887	4.33045	4.33045	4.33045
URIAAL_R10132	5.26152	5.99219	5.4156	5.97014	5.20807	5.16556
URIAAL_R10199	8.42518	8.07858	9.44066	7.41084	9.02038	7.91993
URIAAL_R10198	11.6255	11.3318	12.1379	10.7905	11.9167	11.6625
URIAAL_R01384	4.33045	4.33045	4.33045	4.33045	4.95573	4.33045
URIAAL_R01383	4.33045	5.26918	4.33045	4.33045	4.7743	4.33045
URIAAL_R15288	4.33045	4.33045	4.33045	4.33045	4.33045	4.33045
URIAAL_R15289	4.33045	4.33045	4.33045	4.33045	4.33045	4.33045
URIAAL_R15292	4.33045	4.33045	4.33045	4.33045	4.64492	4.33045
URIAAL_R15290	4.33045	4.33045	4.33045	4.33045	4.33045	4.33045
[truncated: 13,597 more rows]
